# Supplementary material for: Effect of Ripening and In Vitro Digestion on Bioactive Peptides Profile in Ras Cheese and Their Biological Activities
Source: MDPI journal article supplement (doi:10.3390/biology12070948), 2023-07-02
Supplement: s1 [file s1]

**Table S3.** Peptides sharing 100% of sequence homology with previously reported bioactive peptides identified in the low-molecular weight peptide fractions of un-digested and *in vitro* digested Ras cheese samples at different ripening time.

| <i>Peptide sequence</i>             | <i>Protein fragment</i>                               | <i>Bioactivity</i>                                                                                                  | <i>Sample</i>                        |
|-------------------------------------|-------------------------------------------------------|---------------------------------------------------------------------------------------------------------------------|--------------------------------------|
| RELEEL                              | $\beta$ -casein (1-6)                                 | Antioxidant                                                                                                         | R30, R90, R180, DR30, DR90 and DR180 |
| LNVPGEIVE                           | $\beta$ -casein (6-14)                                | ACE-inhibitor (IC <sub>50</sub> =300 $\mu$ mol/L)                                                                   | R30, R90, R180, DR30, DR90 and DR180 |
| NVPGEIVESL                          | $\beta$ -casein (7-16)                                | Antioxidant                                                                                                         | R30, R90, R180, DR30, DR90 and DR180 |
| VPGEIVE                             | $\beta$ -casein (8-14)                                | DPP-IV-inhibitor (IC <sub>50</sub> =225 $\mu$ mol/L)                                                                | R30, R90, R180, DR30, DR90 and DR180 |
| S(pospho)S(pospho)S(pospho)EESITRIN | $\beta$ -casein (17-27)                               | Anti-microbial                                                                                                      | R30                                  |
| FQS(pospho)EEQQQTEDELQDK            | $\beta$ -casein (33-48)                               | Promote calcium uptake                                                                                              | R30, R90, R180, DR30, DR90 and DR180 |
| FQS(pospho)EEQQQTEDELQDKIHPF        | $\beta$ -casein (33-52)                               | Promote calcium uptake                                                                                              | R30, R90, DR30, DR90 and DR180       |
| DKIHP                               | $\beta$ -casein (47-51)                               | ACE-inhibitor (IC <sub>50</sub> =113 $\mu$ mol/L)                                                                   | R30, R90, R180, DR30, DR90 and DR180 |
| DKIHPF                              | $\beta$ -casein (47-52)                               | ACE-inhibitor (IC <sub>50</sub> =257 $\mu$ mol/L)                                                                   | R30, R90, R180, DR30, DR90 and DR180 |
| LVYFPFGPI                           | $\beta$ -casein (58-66)                               | ACE-inhibitor (IC <sub>50</sub> =180 $\mu$ mol/L)                                                                   | R30, R90, DR30, DR90 and DR180       |
| LVYFPFGPIP                          | $\beta$ -casein (58-67)                               | ACE-inhibitor (IC <sub>50</sub> =89 $\mu$ mol/L)                                                                    | R30, R90, R180, DR30, DR90 and DR180 |
| VYFPFGPIPN                          | $\beta$ -casein (59-68)                               | ACE-inhibitor (IC <sub>50</sub> =325 $\mu$ mol/L), antioxidant                                                      | R30, R90, R180, DR30, DR90 and DR180 |
| YFPF                                | $\beta$ -casein (60-63)                               | Opioid, anti-cancer                                                                                                 | R30, R90, R180, DR30, DR90 and DR180 |
| YFPFGPI                             | $\beta$ -casein (60-66)                               | ACE-inhibitor (IC <sub>50</sub> =500 $\mu$ mol/L), antioxidant, opioid, immunomodulator, anxiolytic, anti-cancer    | R30, R180, DR30, DR90 and DR180      |
| YFPFGPIP                            | $\beta$ -casein (60-67)                               | ACE-inhibitor (IC <sub>50</sub> =224 $\mu$ mol/L), antioxidant                                                      | R30, R90, R180, DR30, DR90 and DR180 |
| YFPFGPIPN                           | $\beta$ -casein (60-68)                               | ACE-inhibitor (IC <sub>50</sub> =15 $\mu$ mol/L), DPP-IV-inhibitor (IC <sub>50</sub> =670 $\mu$ mol/L), antioxidant | R30, R90, R180, DR30, DR90 and DR180 |
| PFP                                 | $\beta$ -casein (61-63)<br>$\alpha$ S1-casein (27-29) | ACE-inhibitor (IC <sub>50</sub> =144 $\mu$ mol/L)                                                                   | R30, R90, R180 and DR180             |
| PFPFGPIPN                           | $\beta$ -casein (61-68)                               | ACE-inhibitor                                                                                                       | R30, R90, R180, DR30, DR90 and DR180 |

|                  |                                                       |                                                                                                                                                    |                                            |
|------------------|-------------------------------------------------------|----------------------------------------------------------------------------------------------------------------------------------------------------|--------------------------------------------|
| FPGPIP           | $\beta$ -casein (62-68)                               | DPP-IV-inhibitor<br>(IC <sub>50</sub> =260 $\mu$ mol/L)                                                                                            | R30, R90, R180,<br>DR30, DR90 and<br>DR180 |
| PGPIP            | $\beta$ -casein (63-68)                               | ACE-inhibitor,<br>immunomodulator,<br>anti-cancer, anti-<br>inflammatory                                                                           | R90, R180, DR30,<br>DR90 and DR180         |
| SLPQ             | $\beta$ -casein (69-72)                               | ACE-inhibitor<br>(IC <sub>50</sub> =330 $\mu$ mol/L)                                                                                               | R30, R90, R180,<br>DR30, DR90 and<br>DR180 |
| SLPQNIPPL        | $\beta$ -casein (69-77)                               | DPP-IV-inhibitor                                                                                                                                   | R30, R90, R180,<br>DR30, DR90 and<br>DR180 |
| NIPPLTQTPV       | $\beta$ -casein (73-82)                               | ACE-inhibitor<br>(IC <sub>50</sub> =173 $\mu$ mol/L)                                                                                               | R30, R90, DR30,<br>DR90 and DR180          |
| NIPPLTQTPVVPPFLQ | $\beta$ -casein (73-89)                               | ACE-inhibitor<br>(IC <sub>50</sub> =450 $\mu$ mol/L)                                                                                               | DR30, DR90 and<br>DR180                    |
| IPP              | $\beta$ -casein (74-76)<br>$\kappa$ -casein (108-110) | ACE-inhibitor (IC <sub>50</sub> =5<br>$\mu$ mol/L), DPP-IV-<br>inhibitor (IC <sub>50</sub> =169<br>$\mu$ mol/L), antioxidant,<br>anti-inflammatory | R30, R90, R180,<br>DR30, DR90 and<br>DR180 |
| IPPLTQT          | $\beta$ -casein (74-80)                               | DPP-IV-inhibitor<br>(IC <sub>50</sub> =465 $\mu$ mol/L)                                                                                            | R90 and DR90                               |
| TQTPVVPPFLQPE    | $\beta$ -casein (78-91)                               | Antioxidant                                                                                                                                        | R30, R90, R180,<br>DR30, DR90 and<br>DR180 |
| TPVVPPFLQP       | $\beta$ -casein (80-90)                               | ACE-inhibitor<br>(IC <sub>50</sub> =749 $\mu$ mol/L)                                                                                               | R30, R90, R180,<br>DR30, DR90 and<br>DR180 |
| VVPP             | $\beta$ -casein (83-86)                               | ACE-inhibitor<br>(IC <sub>50</sub> =258 $\mu$ mol/L)                                                                                               | R30, R90, R180,<br>DR30, DR90 and<br>DR180 |
| VPP              | $\beta$ -casein (84-86)                               | ACE-inhibitor (IC <sub>50</sub> =8<br>$\mu$ mol/L), antioxidant,<br>anti-inflammatory                                                              | R30, R90, R180,<br>DR90 and DR180          |
| EAMAPK           | $\beta$ -casein (100-105)                             | Anti-microbial                                                                                                                                     | R30, R90, R180,<br>DR30, DR90 and<br>DR180 |
| HKEMPPFK         | $\beta$ -casein (106-113)                             | Anti-microbial                                                                                                                                     | R90, R180, DR30,<br>DR90 and DR180         |
| EMPPFK           | $\beta$ -casein (108-113)                             | Anti-microbial                                                                                                                                     | R30, R90, R180,<br>DR30, DR90 and<br>DR180 |
| FPKYPVEPF        | $\beta$ -casein (111-119)                             | Antioxidant                                                                                                                                        | R30, R90, R180<br>and DR90                 |
| KYP              | $\beta$ -casein (113-115)                             | ACE-inhibitor<br>(IC <sub>50</sub> =364 $\mu$ mol/L)                                                                                               | R30, R90 and<br>R180                       |
| YPVEPF           | $\beta$ -casein (114-119)                             | DPP-IV-inhibitor<br>(IC <sub>50</sub> =125 $\mu$ mol/L),<br>antioxidant, anti-<br>microbial, opioid                                                | R30, R90, R180,<br>DR30, DR90 and<br>DR180 |
| DVENLHLPLPL      | $\beta$ -casein (129-139)                             | Anti-microbial                                                                                                                                     | R30, DR30, DR90<br>and DR180               |
| NLHLPLPLL        | $\beta$ -casein (132-140)                             | ACE-inhibitor<br>(IC <sub>50</sub> =15 $\mu$ mol/L)                                                                                                | R30, R90, DR90<br>and DR180                |
| NLHLPLP          | $\beta$ -casein (132-138)                             | ACE-inhibitor<br>(IC <sub>50</sub> =51 $\mu$ mol/L)                                                                                                | R30, R90, DR30,<br>DR90 and DR180          |
| LHLPLPL          | $\beta$ -casein (133-139)                             | ACE-inhibitor<br>(IC <sub>50</sub> =425 $\mu$ mol/L)                                                                                               | R30, DR30, DR90<br>and DR180               |
| LHLPLP           | $\beta$ -casein (133-138)                             | ACE-inhibitor (IC <sub>50</sub> =3<br>$\mu$ mol/L)                                                                                                 | R30, DR90 and<br>DR180                     |

|                   |                           |                                                                                                                 |                                            |
|-------------------|---------------------------|-----------------------------------------------------------------------------------------------------------------|--------------------------------------------|
| HLPLP             | $\beta$ -casein (134-138) | ACE-inhibitor<br>(IC <sub>50</sub> =22 $\mu$ mol/L)                                                             | R30, R90, DR30,<br>DR90 and DR180          |
| LPLPLL            | $\beta$ -casein (135-140) | ACE-inhibitor,<br>DPP/IV-inhibitor<br>(IC <sub>50</sub> =372 $\mu$ mol/L)                                       | R30, R90, R180,<br>DR30, DR90 and<br>DR180 |
| LPLPL             | $\beta$ -casein (135-139) | DPP/IV-inhibitor<br>(IC <sub>50</sub> =325 $\mu$ mol/L)                                                         | R30, R90, R180,<br>DR30, DR90 and<br>DR180 |
| LPLP              | $\beta$ -casein (135-138) | ACE-inhibitor<br>(IC <sub>50</sub> =750 $\mu$ mol/L)                                                            | R30, R90, R180,<br>DR30, DR90 and<br>DR180 |
| LQSW              | $\beta$ -casein (140-143) | ACE-inhibitor<br>(IC <sub>50</sub> =500 $\mu$ mol/L)                                                            | R30, R90, R180,<br>DR30, DR90 and<br>DR180 |
| WMHQPHQPLPPT      | $\beta$ -casein (143-154) | ACE-inhibitor, anti-<br>inflammatory                                                                            | DR30, DR90 and<br>DR180                    |
| HQPHQPLPPT        | $\beta$ -casein (145-154) | ACE-inhibitor                                                                                                   | R30, R90, DR30,<br>DR90 and DR180          |
| SKVLPVPQ          | $\beta$ -casein (168-175) | ACE-inhibitor<br>(IC <sub>50</sub> =39 $\mu$ mol/L)                                                             | R90, DR30, DR90<br>and DR180               |
| KVLPVPQ           | $\beta$ -casein (169-175) | ACE-inhibitor<br>(IC <sub>50</sub> =1000 $\mu$ mol/L),<br>anti-inflammatory                                     | R30, R90, R180,<br>DR30, DR90 and<br>DR180 |
| VLPVPQK           | $\beta$ -casein (169-175) | ACE-inhibitor<br>(IC <sub>50</sub> =15 $\mu$ mol/L),<br>antioxidant, anti-<br>microbial                         | R30, R90, DR30,<br>DR90 and DR180          |
| LPVPQ             | $\beta$ -casein (171-175) | DPP-IV-inhibitor<br>(IC <sub>50</sub> =44 $\mu$ mol/L)                                                          | R30, R90, R180,<br>DR30, DR90 and<br>DR180 |
| VPYPQR            | $\beta$ -casein (178-183) | Antioxidant                                                                                                     | R30, R90 and<br>R180                       |
| VPYPQ             | $\beta$ -casein (178-182) | DPP-IV-inhibitor<br>(IC <sub>50</sub> =41 $\mu$ mol/L),<br>antioxidant                                          | R30, R90, R180,<br>DR30, DR90 and<br>DR180 |
| PYPQ              | $\beta$ -casein (179-182) | Antioxidant                                                                                                     | R30, R90, R180,<br>DR30, DR90 and<br>DR180 |
| RDMPIQAF          | $\beta$ -casein (183-190) | ACE-inhibitor<br>(IC <sub>50</sub> =209 $\mu$ mol/L)                                                            | R30 and R90                                |
| LLY               | $\beta$ -casein (191-193) | Antioxidant,<br>immunomodulator,<br>anti-inflammatory                                                           | R30, R90, DR30,<br>DR90 and DR180          |
| LYQEPVLGPVR       | $\beta$ -casein (192-203) | ACE-inhibitor, anti-<br>inflammatory                                                                            | DR30, DR90 and<br>DR180                    |
| YQEPVLGPVR        | $\beta$ -casein (193-203) | ACE-inhibitor<br>(IC <sub>50</sub> =3300 $\mu$ mol/L),<br>antioxidant,<br>immunomodulator,<br>anti-inflammatory | R30, R90, R180,<br>DR30, DR90 and<br>DR180 |
| YQEP              | $\beta$ -casein (193-196) | ACE-inhibitor<br>(IC <sub>50</sub> =317 $\mu$ mol/L),<br>antioxidant                                            | R30, R90 and<br>R180                       |
| YQEPVLGPVRGPFPI   | $\beta$ -casein (193-207) | Anti-microbial                                                                                                  | R30, R90, R180,<br>DR30, DR90 and<br>DR180 |
| YQEPVLGPVRGPFPIIV | $\beta$ -casein (193-209) | ACE-inhibitor<br>(IC <sub>50</sub> =101 $\mu$ mol/L),<br>anti-microbial,<br>immunomodulator                     | R30, R90, R180,<br>DR30, DR90 and<br>DR180 |
| QEPV              | $\beta$ -casein (194-197) | Immunomodulator                                                                                                 | R30, R180, DR30,<br>DR90 and DR180         |

|                                  |                              |                                                                             |                                            |
|----------------------------------|------------------------------|-----------------------------------------------------------------------------|--------------------------------------------|
| QEPVLGPVRGPFPIIV                 | $\beta$ -casein (194-209)    | ACE-inhibitor<br>(IC <sub>50</sub> =600 $\mu$ mol/L)                        | R30, R90, DR30,<br>DR90 and DR180          |
| EPVLGPVRGPFPP                    | $\beta$ -casein (195-206)    | ACE-inhibitor<br>(IC <sub>50</sub> =790 $\mu$ mol/L)                        | R30, R90, R180,<br>DR30, DR90 and<br>DR180 |
| VLGPVRGPFPP                      | $\beta$ -casein (197-206)    | ACE-inhibitor<br>(IC <sub>50</sub> =137 $\mu$ mol/L)                        | R30, R90 and<br>R180                       |
| VRGPFPIIV                        | $\beta$ -casein (201-209)    | ACE-inhibitor<br>(IC <sub>50</sub> =600 $\mu$ mol/L)                        | R30, R90, R180,<br>DR90 and DR180          |
| VRGPFPP                          | $\beta$ -casein (201-206)    | ACE-inhibitor<br>(IC <sub>50</sub> =592 $\mu$ mol/L)                        | R30, R90 and<br>R180                       |
| RPK                              | $\alpha$ S1-casein (1-3)     | ACE-inhibitor<br>(IC <sub>50</sub> =92 $\mu$ mol/L),<br>anti-cancer         | DR30, DR90 and<br>DR180                    |
| RPKHPI                           | $\alpha$ S1-casein (1-6)     | ACE-inhibitor<br>(IC <sub>50</sub> =40 $\mu$ mol/L)                         | R30, R90, R180,<br>DR30 and DR90           |
| RPKHPIK                          | $\alpha$ S1-casein (1-7)     | Anti-microbial                                                              | R30 and R180                               |
| VLNENLLR                         | $\alpha$ S1-casein (15-22)   | Anti-microbial                                                              | R30, R90 and<br>R180                       |
| ENLLRF                           | $\alpha$ S1-casein (18-23)   | ACE-inhibitor<br>(IC <sub>50</sub> =82 $\mu$ mol/L),                        | R30, R90, R180,<br>DR90 and DR180          |
| LRFF                             | $\alpha$ S1-casein (21-24)   | ACE-inhibitor<br>(IC <sub>50</sub> =117 $\mu$ mol/L),                       | R30 and DR180                              |
| FVAPFPEVFG                       | $\alpha$ S1-casein (24-33)   | ACE-inhibitor<br>(IC <sub>50</sub> =650 $\mu$ mol/L)                        | R30, R90, R180,<br>DR30, DR90 and<br>DR180 |
| APFPE                            | $\alpha$ S1-casein (26-30)   | DPP-IV-inhibitor<br>(IC <sub>50</sub> =49 $\mu$ mol/L)                      | R30, R90, R180,<br>DR30, DR90 and<br>DR180 |
| PFPEVFGK                         | $\alpha$ S1-casein (27-34)   | ACE-inhibitor<br>(IC <sub>50</sub> =108 $\mu$ mol/L)                        | R30, R90 and<br>R180                       |
| FPEVFGK                          | $\alpha$ S1-casein (28-34)   | ACE-inhibitor<br>(IC <sub>50</sub> =140 $\mu$ mol/L)                        | R30, R90 and<br>R180                       |
| DIGS(pospho)ES(pospho)TEDQAMEDIK | $\alpha$ S1-casein (43-58)   | Promote calcium<br>uptake                                                   | R90, R180, DR30,<br>DR90 and DR180         |
| VPSERY                           | $\alpha$ S1-casein (86-91)   | ACE-inhibitor<br>(IC <sub>50</sub> =706 $\mu$ mol/L)                        | R30, R90 and<br>R180                       |
| VPSERYL                          | $\alpha$ S1-casein (86-92)   | ACE-inhibitor<br>(IC <sub>50</sub> =250 $\mu$ mol/L)                        | R30, R90 and<br>R180                       |
| RYLGY                            | $\alpha$ S1-casein (90-94)   | ACE-inhibitor (IC <sub>50</sub> =3<br>$\mu$ mol/L), antioxidant             | R30 and DR30                               |
| YLG                              | $\alpha$ S1-casein (91-93)   | Antioxidant                                                                 | R30, R90, R180,<br>DR30, DR90 and<br>DR180 |
| YLGY                             | $\alpha$ S1-casein (91-94)   | Antioxidant                                                                 | R30, R90, R180,<br>DR30 and DR180          |
| YLGYLE                           | $\alpha$ S1-casein (91-96)   | ACE-inhibitor<br>(IC <sub>50</sub> =86 $\mu$ mol/L),<br>antioxidant, opioid | R30, R90, R180,<br>DR90 and DR180          |
| YLGYLEQ                          | $\alpha$ S1-casein (91-97)   | Anxiolytic                                                                  | R30, R90 and<br>R180                       |
| LGY                              | $\alpha$ S1-casein (92-94)   | ACE-inhibitor<br>(IC <sub>50</sub> =22 $\mu$ mol/L),<br>antioxidant         | R30, R90, R180,<br>DR30, DR90 and<br>DR180 |
| YLEQLLR                          | $\alpha$ S1-casein (94-100)  | Anti-microbial                                                              | R30, R90, R180,<br>DR30 and DR90           |
| YKVPQL                           | $\alpha$ S1-casein (104-109) | ACE-inhibitor<br>(IC <sub>50</sub> =22 $\mu$ mol/L)                         | R30, R90, R180,<br>DR90 and DR180          |
| LHSMK                            | $\alpha$ S1-casein (104-109) | Antioxidant                                                                 | DR30, DR90 and<br>DR180                    |

|                |                              |                                                                                                        |                                      |
|----------------|------------------------------|--------------------------------------------------------------------------------------------------------|--------------------------------------|
| AYFYPE         | $\alpha$ S1-casein (143-148) | ACE-inhibitor (IC <sub>50</sub> =22 $\mu$ mol/L), antioxidant                                          | R30, R90, R180, DR30, DR90 and DR180 |
| AYFYPEL        | $\alpha$ S1-casein (143-149) | ACE-inhibitor (IC <sub>50</sub> =7 $\mu$ mol/L), antioxidant, opioid                                   | R30, R180, DR30, DR90 and DR180      |
| YFYPE          | $\alpha$ S1-casein (144-148) | Opioid                                                                                                 | R30, R90, R180, DR30, DR90 and DR180 |
| YFYPEL         | $\alpha$ S1-casein (144-149) | ACE-inhibitor (IC <sub>50</sub> =9 $\mu$ mol/L), antioxidant, opioid                                   | DR30, DR90 and DR180                 |
| PEL            | $\alpha$ S1-casein (147-149) | Antioxidant                                                                                            | R30, R90, R180, DR30, DR90 and DR180 |
| DAYPSGAW       | $\alpha$ S1-casein (157-164) | ACE-inhibitor (IC <sub>50</sub> =98 $\mu$ mol/L)                                                       | R90, R180, DR30, DR90 and DR180      |
| GAW            | $\alpha$ S1-casein (162-164) | ACE-inhibitor (IC <sub>50</sub> =240 $\mu$ mol/L)                                                      | DR30, DR90 and DR180                 |
| SDIPNPIGSENSEK | $\alpha$ S1-casein (147-149) | Anti-microbial                                                                                         | R30, R90, R180, DR30, DR90 and DR180 |
| NMAINPSK       | $\alpha$ S2-casein (25-32)   | ACE-inhibitor (IC <sub>50</sub> =600 $\mu$ mol/L)                                                      | DR30, DR90 and DR180                 |
| KALNEINQF      | $\alpha$ S2-casein (80-88)   | Antioxidant                                                                                            | R30, R90, DR90 and DR180             |
| YQKFPQY        | $\alpha$ S2-casein (89-95)   | ACE-inhibitor (IC <sub>50</sub> =98 $\mu$ mol/L), antioxidant                                          | R30, R90 and R180                    |
| NPWDQ          | $\alpha$ S2-casein (107-111) | Immunomodulator                                                                                        | R30, R90, R180, DR30, DR90 and DR180 |
| VPITPT         | $\alpha$ S2-casein (117-122) | DPP-IV-inhibitor (IC <sub>50</sub> =130 $\mu$ mol/L)                                                   | R30, R90, R180, DR30, DR90 and DR180 |
| LKKISQ         | $\alpha$ S2-casein (164-169) | Anti-microbial                                                                                         | R30                                  |
| FALPQY         | $\alpha$ S2-casein (174-179) | ACE-inhibitor (IC <sub>50</sub> =4 $\mu$ mol/L)                                                        | R30, R90 and R180                    |
| AMKPW          | $\alpha$ S2-casein (189-193) | ACE-inhibitor (IC <sub>50</sub> =580 $\mu$ mol/L)                                                      | R30, R90, R180, DR30, DR90 and DR180 |
| WIQP           | $\alpha$ S2-casein (193-196) | ACE-inhibitor (IC <sub>50</sub> =14 $\mu$ mol/L), DPP-IV-inhibitor (IC <sub>50</sub> =237 $\mu$ mol/L) | R30, R90, R180, DR90 and DR180       |
| TKVIP          | $\alpha$ S2-casein (198-202) | ACE-inhibitor (IC <sub>50</sub> =400 $\mu$ mol/L)                                                      | R30, R90, R180, DR30, DR90 and DR180 |
| TKVIPYVRYL     | $\alpha$ S2-casein (193-207) | Anti-microbial                                                                                         | R30, R90 and R180                    |
| EKDERF         | $\kappa$ -casein (12-17)     | ACE-inhibitor (IC <sub>50</sub> =14 $\mu$ mol/L)                                                       | R30, R90 and R180                    |
| DERF           | $\kappa$ -casein (14-17)     | ACE-inhibitor (IC <sub>50</sub> =38 $\mu$ mol/L)                                                       | R30, R90, R180, DR30, DR90 and DR180 |
| FFSDK          | $\kappa$ -casein (17-21)     | Anti-cancer, anti-microbial                                                                            | R30, R90, DR30, DR90 and DR180       |
| IAK            | $\kappa$ -casein (22-24)     | ACE-inhibitor (IC <sub>50</sub> =16 $\mu$ mol/L)                                                       | DR30, DR90 and DR180                 |

|             |                                      |                                                                                                                 |                                            |
|-------------|--------------------------------------|-----------------------------------------------------------------------------------------------------------------|--------------------------------------------|
| IPIQY       | $\kappa$ -casein (26-30)             | DPP-IV-inhibitor<br>(IC <sub>50</sub> =35 $\mu$ mol/L)                                                          | R30, R90, R180,<br>DR30, DR90 and<br>DR180 |
| YVL         | $\kappa$ -casein (30-32)             | Antioxidant, anti-<br>microbial                                                                                 | R30, R90, R180,<br>DR30, DR90 and<br>DR180 |
| YGL         | $\kappa$ -casein (38-40)             | ACE-inhibitor<br>(IC <sub>50</sub> =409 $\mu$ mol/L)                                                            | R30, R90, R180,<br>DR30 and DR180          |
| INNQFLPYPY  | $\kappa$ -casein (51-60)             | DPP-IV-inhibitor<br>(IC <sub>50</sub> =40 $\mu$ mol/L)                                                          | R30, DR30, DR90<br>and DR180               |
| LPYPY       | $\kappa$ -casein (56-60)             | ACE-inhibitor<br>(IC <sub>50</sub> =29 $\mu$ mol/L),<br>DPP-IV-inhibitor<br>(IC <sub>50</sub> =108 $\mu$ mol/L) | R30, R90, R180,<br>DR30, DR90 and<br>DR180 |
| IIAEK       | $\beta$ -lactoglobulin (71-<br>75)   | ACE-inhibitor<br>(IC <sub>50</sub> =64 $\mu$ mol/L)                                                             | DR30, DR90 and<br>DR180                    |
| IAEK        | $\beta$ -lactoglobulin (72-<br>75)   | ACE-inhibitor<br>(IC <sub>50</sub> =26 $\mu$ mol/L)                                                             | DR30, DR90 and<br>DR180                    |
| VLDTDYK     | $\beta$ -lactoglobulin (94-<br>100)  | ACE-inhibitor<br>(IC <sub>50</sub> =946 $\mu$ mol/L)                                                            | DR90 and DR180                             |
| YLL         | $\beta$ -lactoglobulin (78-<br>80)   | ACE-inhibitor<br>(IC <sub>50</sub> =519 $\mu$ mol/L),<br>antioxidant                                            | R30, R90, R180,<br>DR30, DR90 and<br>DR180 |
| TPEVDDEALEK | $\beta$ -lactoglobulin (125-<br>135) | DPP-IV-inhibitor<br>(IC <sub>50</sub> =320 $\mu$ mol/L),<br>anti-microbial                                      | DR30, DR90 and<br>DR180                    |
| ALPM        | $\beta$ -lactoglobulin (142-<br>145) | ACE-inhibitor<br>(IC <sub>50</sub> =928 $\mu$ mol/L)                                                            | DR30, DR90 and<br>DR180                    |
| ALPMH       | $\beta$ -lactoglobulin (142-<br>146) | ACE-inhibitor<br>(IC <sub>50</sub> =521 $\mu$ mol/L)                                                            | DR30, DR90 and<br>DR180                    |

Peptide bioactivities and IC<sub>50</sub> values were obtained from the Milk Bioactive Peptides Database.

Abbreviations are: R30: Ras cheese at 30 days of ripening; R90: Ras cheese at 90 days of ripening; R180: Ras cheese at 180 days of ripening; DR30: digested Ras cheese at 30 days of ripening; DR90: digested Ras cheese at 90 days of ripening; DR180: digested Ras cheese at 180 days of ripening; ACE: angiotensin-converting enzyme; DPP-IV: dipeptidyl peptidase IV; PEP: prolyl-endopeptidase.
