# Supplementary material for: Effect of Ripening and In Vitro Digestion on Bioactive Peptides Profile in Ras Cheese and Their Biological Activities
Source: MDPI journal article supplement (doi:10.3390/biology12070948), 2023-07-02
Supplement: s1 [file s1]

### Supplementary Figure captions.

**Figure S1.** Heat map showing differences in semi-quantitative data among  $\alpha$ S1-casein individual peptides in undigested Ras cheese at different ripening times.

**Figure S2.** Heat map showing differences in semi-quantitative data among  $\beta$ -casein individual peptides in undigested Ras cheese at different ripening times.

**Figure S3.** Venn diagrams showing differences and similarity on the peptide profiles between undigested (Ras samples) and *in vitro* digested (D-Ras samples). Ras cheese at different ripening times.
