# Supplementary material for: Effect of Ripening and In Vitro Digestion on Bioactive Peptides Profile in Ras Cheese and Their Biological Activities
Source: MDPI journal article supplement (doi:10.3390/biology12070948), 2023-07-02
Supplement: s1 [file s1]

**Table S1.** Gros chemical composition (% w/w) of Ras cheese at different ripening times.

| Ripening time (Days) | Dry matter (DM)         | Fat                     | Fat in Dry Matter (%)   | Protein                 | Soluble protein        | Soluble protein coefficient (%) | Salt                   |
|----------------------|-------------------------|-------------------------|-------------------------|-------------------------|------------------------|---------------------------------|------------------------|
| 30                   | 63.6 ± 2.4 <sup>a</sup> | 33.4 ± 1.6 <sup>a</sup> | 52.5 ± 2.8 <sup>a</sup> | 25.5 ± 1.2 <sup>a</sup> | 3.2 ± 0.1 <sup>c</sup> | 12.6 ± 1.2 <sup>b</sup>         | 2.3 ± 0.1 <sup>c</sup> |
| 90                   | 65.1 ± 2.1 <sup>a</sup> | 34.3 ± 2.0 <sup>a</sup> | 52.7 ± 1.3 <sup>a</sup> | 25.9 ± 1.7 <sup>a</sup> | 4.6 ± 0.2 <sup>b</sup> | 17.8 ± 1.3 <sup>a</sup>         | 3.2 ± 0.2 <sup>b</sup> |
| 180                  | 67.3 ± 2.4 <sup>a</sup> | 35.2 ± 1.1 <sup>a</sup> | 52.3 ± 2.1 <sup>a</sup> | 27.8 ± 1.2 <sup>a</sup> | 5.3 ± 0.2 <sup>a</sup> | 19.0 ± 1.1 <sup>a</sup>         | 3.9 ± 0.2 <sup>a</sup> |
