# Supplementary material for: Effect of Ripening and In Vitro Digestion on Bioactive Peptides Profile in Ras Cheese and Their Biological Activities
Source: Biology (Basel). 2023 Jul 2;12(7):948. doi: 10.3390/biology12070948 (PMC10376354; doi:10.3390/biology12070948)
Supplement: Supplementary file 1 [file biology-12-00948-s001.zip]

Archive with 8 entries (8 files):
- Figure_S1.png
- Figure_S2.png
- Figure_S3.jpg
- Supplementary Figure captions.pdf
- Table_S1.pdf
- Table_S2.xlsx
- Table_S3.pdf
- Table_S4.xlsx
