# Supplementary material for: Effect of Ripening and In Vitro Digestion on Bioactive Peptides Profile in Ras Cheese and Their Biological Activities
Source: Biology (Basel). 2023 Jul 2;12(7):948. doi: 10.3390/biology12070948 (PMC10376354; doi:10.3390/biology12070948)
Supplement: Supplementary file 1 [file biology-12-00948-s001.zip › Table_S2.xlsx]

## Sheet: Skyline_raw_data_proteins
Table S2. Skyline raw data output. The intensity data are the average of three different injections. Empty cells indicated that the peptide was not found in that specific sample. DR means digested Ras cheese whereas R means un-digested Ras cheese. The number indicates the days of ripening. TRUE means that the peptide was identified by Mascot software through the analysis of the frgamentation spec…
Protein	Peptide	Precursor	Precursor Charge	Precursor Mz	Peptide Modified Sequence	DR180_1a10_10uL Best Retention Time	DR180_1a10_10uL Min Start Time	DR180_1a10_10uL Max End Time	DR180_1a10_10uL Total Area	DR180_1a10_10uL Average Mass Error PPM	DR180_1a10_10uL Isotope Dot Product	DR180_1a10_10uL Identified	DR90_1a10_10uL Best Retention Time	DR90_1a10_10uL Min Start Time	DR90_1a10_10uL Max End Time	DR90_1a10_10uL Total Area	DR90_1a10_10uL Average Mass Error PPM	DR90_1a10_10uL Isotope Dot Product	DR90_1a10_10uL Identified	DR30_1a10_10uL Best Retention Time	DR30_1a10_10uL Min Start Time	DR30_1a10_10uL Max End Time	DR30_1a10_10uL Total Area	DR30_1a10_10uL Average Mass Error PPM	DR30_1a10_10uL Isotope Dot Product	DR30_1a10_10uL Identified	R180_10uL_1a10 Best Retention Time	R180_10uL_1a10 Min Start Time	R180_10uL_1a10 Max End Time	R180_10uL_1a10 Total Area	R180_10uL_1a10 Average Mass Error PPM	R180_10uL_1a10 Isotope Dot Product	R180_10uL_1a10 Identified	R90_ND_10uL Best Retention Time	R90_ND_10uL Min Start Time	R90_ND_10uL Max End Time	R90_ND_10uL Total Area	R90_ND_10uL Average Mass Error PPM	R90_ND_10uL Isotope Dot Product	R90_ND_10uL Identified	R30_ND_10uL Best Retention Time	R30_ND_10uL Min Start Time	R30_ND_10uL Max End Time	R30_ND_10uL Total Area	R30_ND_10uL Average Mass Error PPM	R30_ND_10uL Isotope Dot Product	R30_ND_10uL Identified
sp|P00711|LALBA_BOVIN	LTK	361.2445+	1	361.245	LTK								2	1.95	2.1	272507392	-2.4	0.9854	ALIGNED								2.07	1.97	2.16	93861	0.7	0.8916	ALIGNED	2.23	2.16	2.34	445083	-0.4	0.8911	ALIGNED	2.22	2.04	2.39	2127183	-0.2	0.9846	TRUE
sp|P00711|LALBA_BOVIN	LTK	441.2109+	1	441.211	LT[+80]K	21.87	21.8	21.98	7495395	0.8	0.9751	TRUE	21.89	21.72	21.99	11929216	-0.1	0.9942	ALIGNED	21.79	21.61	21.95	11818625	0	0.9811	ALIGNED								21.78	21.53	21.89	4006411	2.2	0.9811	ALIGNED	21.75	21.46	21.87	3100080	1.8	0.9804	ALIGNED
sp|P00711|LALBA_BOVIN	LLLV	457.3384+	1	457.338	LLLV	15.23	15.16	15.35	16066222	-0.4	0.878	ALIGNED	15.21	15.11	15.37	18085246	-0.9	0.8751	TRUE																						14.94	14.83	15.07	300481	3.6	0.8715	ALIGNED
sp|P00711|LALBA_BOVIN	GYGGVSLPEWV	582.2902++	2	582.29	GYGGVSLPEWV	19.35	19.22	19.47	27226388	0.8	0.9887	TRUE	19.34	19.21	19.45	24114148	0.8	0.9928	ALIGNED	19.23	19.08	19.37	4392144	1.7	0.9903	ALIGNED
sp|P00711|LALBA_BOVIN	VSL	318.2023+	1	318.202	VSL	8.41	8.34	8.53	80853488	-1.5	0.9753	TRUE	7.49	7.33	7.66	375371808	-0.7	0.9838	TRUE	7.52	7.39	7.66	237487552	-0.7	0.9853	ALIGNED	7.53	7.38	7.67	285387	0.3	0.9015	ALIGNED	7.59	7.51	7.74	2174033	-0.8	0.907	ALIGNED	7.59	7.52	7.75	3273809	-1.2	0.9216	TRUE
sp|P00711|LALBA_BOVIN	IVQNN	589.2828+	1	589.283	IVQ[+1]N[+1]N	4.15	4.08	4.2	1033826	-1.1	0.8826	ALIGNED	4.15	4.08	4.18	645107	-0.9	0.9175	ALIGNED	4.16	4.13	4.22	496244	-3.8	0.8436	ALIGNED	4.23	4.09	4.3	881910	0.7	0.9896	TRUE	4.26	4.18	4.38	1563464	-0.2	0.9631	ALIGNED	4.26	4.23	4.33	79654	-2.2	0.8315	ALIGNED
sp|P00711|LALBA_BOVIN	NNK	377.1667+	1	377.167	N[+1]N[+1]K	4.21	4.16	4.34	270582080	-0.8	0.9796	TRUE	4.2	4.13	4.33	242436448	-0.9	0.9801	TRUE	4.21	4.14	4.35	252171024	-0.5	0.9768	TRUE
sp|P00711|LALBA_BOVIN	FLDDDLTDDIM	656.7843++	2	656.784	FLDDDLTDDIM	18.23	18.13	18.33	21149542	-0.6	0.9861	TRUE	18.2	18.13	18.33	19895060	-0.8	0.9975	ALIGNED	18.12	18.03	18.26	26696294	0	0.9845	TRUE
sp|P00711|LALBA_BOVIN	ILDK	488.3079+	1	488.308	ILDK	3.87	3.8	3.99	22354882	0	0.97	TRUE	3.84	3.77	3.94	20696760	-0.3	0.9901	TRUE	3.88	3.8	3.98	14553335	-0.2	0.9723	TRUE
sp|P00711|LALBA_BOVIN	ILDK	244.6576++	2	244.658	ILDK	3.87	3.8	3.99	58643392	-0.8	0.9706	TRUE	3.84	3.77	3.94	50568552	-1.1	0.9769	TRUE	3.88	3.8	3.98	36318960	-1	0.9794	TRUE
sp|P00711|LALBA_BOVIN	ILDKV	294.1918++	2	294.192	ILDKV	8.09	8.02	8.19	42369012	-0.6	0.9739	TRUE	8.07	8	8.17	45978472	-1	0.9753	TRUE	8.08	8.01	8.19	40667600	-0.4	0.9878	TRUE
sp|P00711|LALBA_BOVIN	VGI	288.1918+	1	288.192	VGI	7.71	7.51	7.84	161709968	-0.3	0.9833	ALIGNED	7.61	7.49	7.81	274426208	-0.5	0.9818	TRUE	7.62	7.52	7.8	1255446144	0	0.9861	ALIGNED	7.67	7.56	7.81	1537861	0.2	0.975	TRUE	7.74	7.65	7.89	35292932	-0.9	0.9848	TRUE	7.75	7.65	7.89	138445568	0.3	0.9849	ALIGNED
sp|P00711|LALBA_BOVIN	VGIN	402.2347+	1	402.235	VGIN	5.38	5.33	5.48	79503272	0.2	0.9547	TRUE	5.36	5.32	5.49	86666504	-0.3	0.9582	TRUE	5.39	5.35	5.51	143424704	0.2	0.966	TRUE								5.45	5.45	5.53	203711	0	0.962	ALIGNED
sp|P02662|CASA1_BOVIN	RPK	400.2667+	1	400.267	RPK	0.53	0.42	0.62	48209024	-1.3	0.9647	ALIGNED	0.53	0.42	0.6	71025456	-0.5	0.9635	ALIGNED	0.53	0.42	0.59	81586744	-1	0.9723	TRUE
sp|P02662|CASA1_BOVIN	RPKHP	317.6928++	2	317.693	RPKHP																						0.65	0.59	0.77	1518670	-1.3	0.9725	TRUE	0.68	0.61	0.74	585338	-1.5	0.9455	ALIGNED	0.8	0.65	0.87	1517398	-2.1	0.9667	ALIGNED
sp|P02662|CASA1_BOVIN	RPKHPI	374.2348++	2	374.235	RPKHPI																						1.91	1.78	2.55	11015748	0.1	0.9827	TRUE	2.06	1.97	2.61	20849300	-0.8	0.9844	TRUE	2.1	2	2.54	3558263	-0.4	0.9661	TRUE
sp|P02662|CASA1_BOVIN	RPKHPI	249.8257+++	3	249.826	RPKHPI								1.78	1.63	1.95	833261	-0.8	0.8281	ALIGNED	1.78	1.69	1.89	927265	0.1	0.8015	ALIGNED	1.91	1.78	2.55	38794120	0.2	0.9877	TRUE	2.06	1.97	2.61	64523344	-1	0.9853	TRUE	2.12	2	2.54	13415010	-0.9	0.9817	TRUE
sp|P02662|CASA1_BOVIN	RPKHPIKHQGLPQ	384.7284++++	4	384.728	RPKHPIKHQGLPQ																						4.48	4.24	5.61	13114232	-4.1	0.9445	ALIGNED	4.58	4.28	5.68	50857672	-3.9	0.9667	ALIGNED	4.57	4.24	5.53	41512908	-2.1	0.9953	TRUE
sp|P02662|CASA1_BOVIN	RPKHPIK	292.5240+++	3	292.524	RPKHPIK																						0.68	0.63	0.74	8881385	-1.4	0.9784	TRUE								0.83	0.78	1.1	1099040	-2.1	0.9762	ALIGNED
sp|P02662|CASA1_BOVIN	PKHPI	296.1843++	2	296.184	PKHPI	2.43	2.39	2.51	46283600	-0.4	0.9411	TRUE	2.43	2.36	2.53	27875262	-0.8	0.955	ALIGNED	2.43	2.39	2.5	9741292	-0.7	0.9428	ALIGNED	2.73	2.59	2.98	1320769	0.4	0.9156	ALIGNED
sp|P02662|CASA1_BOVIN	KHPIK	311.7054++	2	311.705	KHPIK	0.64	0.56	0.69	14703288	-2.2	0.9706	ALIGNED	0.63	0.56	0.71	16809032	-2	0.96	ALIGNED	0.64	0.56	0.69	2420188	-1.9	0.9313	ALIGNED								0.71	0.66	0.8	3480341	-2	0.9692	TRUE	0.76	0.71	0.85	226971	-4	0.9451	ALIGNED
sp|P02662|CASA1_BOVIN	KHPI	494.3085+	1	494.309	KHPI	1.19	1.14	1.26	57136336	-0.7	0.9833	TRUE	1.19	1.11	1.37	130578784	-1.3	0.9795	ALIGNED	1.18	1.05	1.39	89363328	-1.1	0.9714	TRUE	1.3	1.26	1.46	580049	1.4	0.9628	ALIGNED	1.42	1.13	1.48	1567268	1.1	0.9647	ALIGNED	1.45	1.31	1.54	137961	2.5	0.8736	ALIGNED
sp|P02662|CASA1_BOVIN	HPI	366.2136+	1	366.214	HPI	2.4	2.25	2.72	3297890048	-0.2	0.9785	TRUE	2.37	2.23	2.7	5018766336	-0.5	0.982	TRUE	2.4	2.25	2.7	4840271872	-0.3	0.9809	TRUE	2.42	2.3	2.78	130031392	-0.5	0.9773	TRUE	2.56	2.4	2.9	89362296	-0.7	0.9794	ALIGNED	2.64	2.44	2.91	10541751	0.5	0.9799	ALIGNED
sp|P02662|CASA1_BOVIN	HPIKHQGLPQ	577.8251++	2	577.825	HPIKHQGLPQ																						4.88	4.79	5.06	8579878	-0.1	0.9891	TRUE	4.96	4.85	5.13	9351526	-1.7	0.9851	ALIGNED	4.98	4.86	5.08	961396	-3.4	0.9559	ALIGNED
sp|P02662|CASA1_BOVIN	HPIKHQ	380.2167++	2	380.217	HPIKHQ	0.6	0.51	0.65	8318875	-2.8	0.9696	ALIGNED	0.6	0.56	0.65	8043771	-2.6	0.9848	ALIGNED	0.6	0.56	0.66	4066150	-4.2	0.9071	ALIGNED	0.59	0.54	0.69	9321203	0.6	0.9279	TRUE	0.7	0.65	0.79	19255270	-1.6	0.9806	TRUE	0.76	0.64	0.89	2790953	-2	0.9738	ALIGNED
sp|P02662|CASA1_BOVIN	HPIK	494.3085+	1	494.309	HPIK	0.76	0.72	0.96	1737501184	-1.4	0.9876	TRUE	0.77	0.72	0.95	1603303680	-1.7	0.9875	TRUE	0.77	0.72	0.94	459937504	-1.4	0.9811	TRUE	0.78	0.73	1.01	50087060	-1.1	0.9841	TRUE	0.81	0.79	0.9	69643056	-2.2	0.982	TRUE	0.83	0.78	1.03	953520	-1.6	0.8742	ALIGNED
sp|P02662|CASA1_BOVIN	HPIK	247.6579++	2	247.658	HPIK	0.76	0.72	0.96	1789391872	-1.7	0.9854	TRUE	0.77	0.72	0.95	1782716800	-1.8	0.984	TRUE	0.77	0.72	0.94	556970560	-1.6	0.9816	TRUE	0.78	0.73	1.01	192662816	-2.9	0.9831	TRUE	0.84	0.79	0.9	82939528	-3.2	0.9809	TRUE	0.83	0.78	1.03	2255173	-2	0.9764	ALIGNED
sp|P02662|CASA1_BOVIN	HPIKH	631.3675+	1	631.367	HPIKH	0.62	0.57	0.7	198915824	-2.3	0.984	TRUE	0.61	0.56	0.7	197576240	-2.1	0.9855	TRUE	0.62	0.56	0.69	77875064	-2.1	0.9864	TRUE								0.7	0.65	0.84	586353	-1	0.9605	TRUE
sp|P02662|CASA1_BOVIN	HPIKH	316.1874++	2	316.187	HPIKH	0.62	0.57	0.7	250705408	-2.3	0.9834	TRUE	0.61	0.56	0.7	299844608	-2.1	0.9842	TRUE	0.62	0.56	0.69	165985888	-2.2	0.9847	TRUE								0.7	0.65	0.84	2901971	-1.6	0.9657	TRUE
sp|P02662|CASA1_BOVIN	HPIKH	211.1273+++	3	211.127	HPIKH	0.62	0.57	0.7	193052880	-2.5	0.9668	TRUE	0.61	0.56	0.7	226479680	-2.2	0.9774	TRUE	0.62	0.56	0.69	125113856	-1.9	0.9689	TRUE	0.62	0.56	0.74	704333	-1.5	0.9141	ALIGNED	0.7	0.65	0.84	2350357	-2.6	0.9336	TRUE
sp|P02662|CASA1_BOVIN	HPIKHQ	380.7087++	2	380.709	HPIKHQ[+1]	0.66	0.63	0.73	123751480	-1.6	0.9939	TRUE	0.66	0.62	0.73	81944456	-2	0.9929	TRUE	0.66	0.53	0.73	3811385	2.7	0.8067	ALIGNED	0.66	0.61	0.74	16832934	-1.2	0.9856	TRUE	0.8	0.76	0.87	22243120	-2	0.9892	TRUE	0.82	0.76	0.87	315799	-1.9	0.9098	ALIGNED
sp|P02662|CASA1_BOVIN	HPIKHQ	254.1415+++	3	254.142	HPIKHQ[+1]	0.66	0.63	0.73	119929152	-1.5	0.9734	TRUE	0.66	0.62	0.73	91559016	-1.7	0.9829	TRUE	0.66	0.53	0.73	2489682	-1.3	0.9392	ALIGNED	0.66	0.61	0.74	18811412	-1.1	0.9851	TRUE	0.82	0.76	0.87	9756115	-2.2	0.9782	TRUE	0.82	0.76	0.87	290045	-1.8	0.9609	ALIGNED
sp|P02662|CASA1_BOVIN	PIK	357.2496+	1	357.25	PIK	1.03	1	1.06	8001125	-1.3	0.9516	TRUE	0.76	0.6	0.96	451282272	-1.9	0.9852	ALIGNED	1.03	0.98	1.13	20658880	-1.3	0.9597	TRUE	0.78	0.64	0.98	47015228	-1.8	0.9825	TRUE	0.84	0.79	0.9	21034436	-2.4	0.9786	TRUE	1.14	1.03	1.21	642178	-1.7	0.9532	ALIGNED
sp|P02662|CASA1_BOVIN	PIKH	494.3085+	1	494.309	PIKH	0.62	0.57	0.7	60271808	-2	0.9715	ALIGNED	0.61	0.57	0.7	75541496	-1.9	0.9717	TRUE															0.81	0.68	0.97	77329424	-2.1	0.9821	ALIGNED	0.83	0.71	1.03	1094657	-1.5	0.8746	ALIGNED
sp|P02662|CASA1_BOVIN	IKHQGLPQ	460.7693++	2	460.769	IKHQGLPQ	5.41	5.3	5.52	34430256	-0.1	0.9891	ALIGNED	5.39	5.29	5.5	26822734	-0.5	0.9821	ALIGNED	5.42	5.32	5.53	14636118	0.1	0.9888	ALIGNED	5.41	5.32	5.52	7371372	-1.1	0.9823	ALIGNED	5.48	5.37	5.74	18258538	-0.7	0.9812	TRUE	5.48	5.36	5.65	7676104	-4.5	0.9718	ALIGNED
sp|P02662|CASA1_BOVIN	KHQGLPQEV	518.2827++	2	518.283	KHQGLPQEV	7.62	7.53	7.77	27102590	1.4	0.9636	TRUE	7.61	7.56	7.71	49425828	0.4	0.9951	TRUE	7.63	7.53	7.76	22026476	1.6	0.973	ALIGNED															7.71	7.65	7.76	114716	-1.2	0.9117	ALIGNED
sp|P02662|CASA1_BOVIN	KHQGLPQEV	345.8576+++	3	345.858	KHQGLPQEV	7.62	7.53	7.77	16911026	0.6	0.9597	TRUE	7.61	7.56	7.71	31292926	-0.2	0.9664	TRUE	7.63	7.53	7.76	12179826	-0.2	0.9704	ALIGNED								7.7	7.56	7.85	71505	0.3	0.8145	ALIGNED
sp|P02662|CASA1_BOVIN	KHQGLPQ	807.4472+	1	807.447	KHQGLPQ	3.97	3.87	4.11	25679916	0.3	0.9729	TRUE	3.96	3.86	4.08	30362124	-0.1	0.9843	TRUE	3.96	3.87	4.12	90849528	-0.1	0.991	TRUE	4.05	3.96	4.21	1229727	0.5	0.9754	TRUE	4.14	4.03	4.4	5144900	-0.8	0.9912	TRUE	4.15	4.03	4.3	2277648	-2.6	0.9864	ALIGNED
sp|P02662|CASA1_BOVIN	KHQGLPQ	404.2272++	2	404.227	KHQGLPQ	3.97	3.87	4.11	158816000	-0.2	0.9906	TRUE	3.96	3.86	4.08	184641152	-0.6	0.9992	TRUE	3.96	3.87	4.12	508399328	-0.5	0.9938	TRUE	4.06	3.96	4.21	22239026	0.1	0.994	TRUE	4.14	4.03	4.4	44550136	-1.1	0.9879	TRUE	4.15	4.03	4.3	14574932	-2.6	0.9863	ALIGNED
sp|P02662|CASA1_BOVIN	KHQGLPQ	269.8206+++	3	269.821	KHQGLPQ	3.97	3.87	4.11	59010368	0	0.9912	TRUE	3.94	3.86	4.08	67713376	-0.3	0.9851	TRUE	3.96	3.87	4.12	205791360	-0.2	0.9949	TRUE	4.06	3.96	4.21	10220312	0.1	0.9933	TRUE	4.14	4.03	4.4	20196572	-0.8	0.9895	TRUE	4.15	4.03	4.3	6317835	-2.2	0.9792	ALIGNED
sp|P02662|CASA1_BOVIN	KHQGLPQ	404.7192++	2	404.719	KHQ[+1]GLPQ	4.37	4.26	4.48	128666224	-0.2	0.9843	TRUE	4.35	4.25	4.48	85466344	-0.8	0.9883	ALIGNED	4.39	4.29	4.47	5902791	-1.1	0.9662	ALIGNED	4.49	4.36	4.63	13166005	-1	0.9868	ALIGNED	4.57	4.42	4.79	29012214	-1	0.9862	TRUE	4.57	4.44	4.8	1475393	-0.8	0.9617	ALIGNED
sp|P02662|CASA1_BOVIN	HQGLPQ	680.3362+	1	680.336	HQ[+1]GLPQ	5.72	5.56	5.87	55892244	3.4	0.9827	TRUE	5.69	5.54	5.86	43402116	3.2	0.9954	TRUE	2.22	2.1	2.31	5230322	-0.3	0.9349	TRUE	5.73	5.55	5.87	1518913	0.5	0.9821	TRUE	5.75	5.6	5.94	12694618	0	0.9903	TRUE
sp|P02662|CASA1_BOVIN	HQGLPQ	340.6717++	2	340.672	HQ[+1]GLPQ	5.7	5.56	5.87	114423776	1.3	0.9937	TRUE	5.69	5.54	5.86	86788664	0.8	0.995	TRUE	2.22	2.1	2.31	6545709	-0.8	0.9703	TRUE	5.73	5.55	5.87	8700666	0	0.9869	TRUE	5.78	5.6	5.94	45619020	0	0.9882	TRUE
sp|P02662|CASA1_BOVIN	HQGLPQ	340.6717++	2	340.672	HQGLPQ[+1]	6.01	5.93	6.15	9934258	-0.1	0.9586	ALIGNED	6	5.88	6.09	8758284	-2.1	0.969	ALIGNED	6.02	5.89	6.13	4521477	-0.6	0.9114	ALIGNED	6.01	5.91	6.12	424686	0.4	0.8383	ALIGNED	6.07	5.96	6.23	6919364	-1.1	0.9703	TRUE	6.06	5.95	6.22	1658540	-0.5	0.9819	TRUE
sp|P02662|CASA1_BOVIN	HQGLP	551.2936+	1	551.294	HQGLP																						6.16	6.16	6.74	1543053	-1.6	0.9794	ALIGNED	6.32	6.23	6.85	10756305	0.4	0.9249	TRUE	6.25	6.25	6.63	563913	-0.4	0.9092	ALIGNED
sp|P02662|CASA1_BOVIN	HQGLP	276.1504++	2	276.15	HQGLP	6.24	6.17	6.63	13365913	0.3	0.9671	ALIGNED	6.22	6.15	6.59	12622088	-0.1	0.9467	ALIGNED	6.24	6.16	6.64	15368665	0.1	0.9542	TRUE	6.24	6.16	6.74	2111783	0.5	0.969	ALIGNED	6.32	6.23	6.85	10584762	0.2	0.9738	TRUE	6.34	6.25	6.63	1377560	0.4	0.9612	ALIGNED
sp|P02662|CASA1_BOVIN	HQGLPQE	808.3948+	1	808.395	HQGLPQE	6.17	5.91	6.27	102564488	-0.1	0.9932	TRUE	6.13	5.92	6.26	235954368	-0.7	0.993	TRUE	6.15	5.93	6.28	78597568	-0.3	0.9946	TRUE	6.16	6	6.29	94370	0.9	0.8252	TRUE	6.2	6.04	6.35	1505419	0.8	0.9743	TRUE	6.13	5.96	6.33	65817	0.3	0.8008	ALIGNED
sp|P02662|CASA1_BOVIN	HQGLPQE	404.7010++	2	404.701	HQGLPQE	6.17	5.91	6.27	253295392	0.1	0.9924	TRUE	6.13	5.92	6.26	604384000	-0.6	0.9932	TRUE	6.17	5.93	6.28	217453568	-0.2	0.988	TRUE	6.18	6	6.29	1389363	0.6	0.9532	TRUE	6.2	6.04	6.35	10472320	0.5	0.986	TRUE	6.19	5.96	6.33	1102935	-0.1	0.9819	ALIGNED
sp|P02662|CASA1_BOVIN	HQGLPQ	679.3522+	1	679.352	HQGLPQ	5.22	5.05	5.34	828118848	-0.5	0.99	TRUE	5.19	5.04	5.35	1566649728	-1.3	0.9919	TRUE	5.22	5.08	5.36	2080827648	-0.8	0.9902	TRUE	5.26	5.12	5.37	3644393	-0.2	0.979	TRUE	5.31	5.17	5.45	40775472	-1.1	0.9846	TRUE	5.31	5.18	5.45	4035162	-1.8	0.9762	TRUE
sp|P02662|CASA1_BOVIN	HQGLPQ	340.1797++	2	340.18	HQGLPQ	5.22	5.05	5.34	1347488512	-0.3	0.99	TRUE	5.21	5.04	5.35	2481169920	-0.9	0.994	TRUE	5.21	5.08	5.36	3354494720	-0.5	0.9936	TRUE	5.24	5.12	5.37	14983878	-0.3	0.9801	TRUE	5.3	5.17	5.45	76092816	-1	0.9849	TRUE	5.3	5.18	5.45	13149271	-1.9	0.9803	TRUE
sp|P02662|CASA1_BOVIN	HQGLP	552.2776+	1	552.278	HQ[+1]GLP	6.71	6.64	6.86	1677739	-0.3	0.8172	ALIGNED															6.74	6.62	7.03	712114	2.5	0.9252	ALIGNED	6.83	6.65	7.26	6474894	2.2	0.9377	TRUE
sp|P02662|CASA1_BOVIN	HQGLP	276.6425++	2	276.642	HQ[+1]GLP	6.72	6.64	6.86	1751045	-0.5	0.8352	ALIGNED	6.72	6.63	6.86	1825971	-0.4	0.9092	ALIGNED								6.74	6.62	7.03	1158624	0	0.9371	ALIGNED	6.83	6.65	7.26	9035770	-0.7	0.9448	TRUE
sp|P02662|CASA1_BOVIN	HQGLPQEV	907.4632+	1	907.463	HQGLPQEV	8.93	8.86	9.05	285973888	0	0.9917	TRUE	8.91	8.83	9.04	706801984	-0.6	0.9928	TRUE	8.93	8.86	9.07	209631168	0	0.9926	TRUE
sp|P02662|CASA1_BOVIN	HQGLPQEV	454.2352++	2	454.235	HQGLPQEV	8.94	8.86	9.05	975067776	-0.2	0.9942	TRUE	8.91	8.83	9.04	2343516160	-0.7	0.995	TRUE	8.94	8.86	9.07	642278144	-0.2	0.992	TRUE															9	8.91	9.07	175784	-0.8	0.8632	ALIGNED
sp|P02662|CASA1_BOVIN	HQGLPQEVL	1020.5473+	1	1020.55	HQGLPQEVL	12.23	12.07	12.44	26435540	0.4	0.9831	TRUE	12.16	12.07	12.43	73519528	-0.1	0.9883	TRUE
sp|P02662|CASA1_BOVIN	HQGLPQEVL	510.7773++	2	510.777	HQGLPQEVL	12.2	12.07	12.44	225007072	0.2	0.9963	TRUE	12.16	12.07	12.43	566553344	-0.2	0.9983	TRUE															12.17	12.02	12.35	1340017	1.8	0.9678	ALIGNED	12.15	12.05	12.35	3387347	1.2	0.9868	ALIGNED
sp|P02662|CASA1_BOVIN	QGL	318.1660+	1	318.166	Q[+1]GL	5	4.92	5.11	49931068	-0.7	0.9677	ALIGNED	4.99	4.92	5.07	49132364	-1.2	0.9714	TRUE
sp|P02662|CASA1_BOVIN	QGLPQEV	770.4043+	1	770.404	QGLPQEV	10.36	10.26	10.48	274338880	-1.2	0.9893	TRUE	10.32	10.24	10.48	613995200	-1.7	0.9918	TRUE	10.31	10.23	10.47	269578400	-1.2	0.9876	TRUE
sp|P02662|CASA1_BOVIN	QGLPQEV	385.7058++	2	385.706	QGLPQEV	10.33	10.26	10.48	64050976	-1.3	0.9943	TRUE	10.32	10.24	10.48	117998152	-1.6	0.9743	TRUE	10.3	10.23	10.47	69114376	-1.3	0.9804	TRUE															10.34	10.34	10.4	42125	-0.1	0.8736	ALIGNED
sp|P02662|CASA1_BOVIN	QGLPQ	542.2933+	1	542.293	QGLPQ	6.29	6.19	6.39	713882944	0.1	0.9861	TRUE	6.27	6.18	6.38	781583232	-0.4	0.9886	TRUE	6.29	6.19	6.4	1599408384	0	0.9911	TRUE	6.3	6.21	6.4	10431539	0.6	0.9765	TRUE	6.32	6.23	6.44	45658064	0.5	0.9857	TRUE	6.34	6.23	6.44	11303711	0.7	0.9837	TRUE
sp|P02662|CASA1_BOVIN	QGLPQ	271.6503++	2	271.65	QGLPQ	6.29	6.19	6.39	145692704	-0.3	0.9815	TRUE	6.27	6.18	6.38	151167280	-0.7	0.9793	TRUE	6.29	6.19	6.4	330183008	-0.6	0.9835	TRUE	6.3	6.21	6.4	4643445	0	0.9706	TRUE	6.32	6.23	6.44	16095991	-0.2	0.981	TRUE	6.34	6.23	6.44	4732003	-0.1	0.9799	TRUE
sp|P02662|CASA1_BOVIN	QGLP	414.2347+	1	414.235	QGLP	7.72	7.61	8.14	37184768	1.7	0.9871	ALIGNED	7.75	7.62	8.11	21137560	1	0.9814	ALIGNED	7.74	7.61	8.15	18704304	1.3	0.9703	ALIGNED	7.72	7.58	8.34	5025827	0	0.9302	TRUE	7.77	7.66	8.5	28411666	-0.5	0.9695	ALIGNED
sp|P02662|CASA1_BOVIN	QGLPQEVL	442.2478++	2	442.248	QGLPQEVL	13.87	13.77	14.01	34940180	-0.1	0.9976	ALIGNED	13.87	13.76	14.03	73332120	-0.5	0.9971	TRUE															13.81	13.67	13.99	1304002	1.8	0.9782	ALIGNED	13.78	13.65	13.91	2224021	-0.1	0.9911	ALIGNED
sp|P02662|CASA1_BOVIN	QGLPQ	543.2773+	1	543.277	Q[+1]GLPQ	6.69	6.54	6.81	1286827136	-0.1	0.9913	TRUE	6.59	6.52	6.8	1248906880	-0.5	0.9779	TRUE	6.61	6.56	6.78	368227712	0.1	0.9794	ALIGNED	6.62	6.55	6.83	70417552	0.4	0.9901	ALIGNED	6.65	6.57	6.84	518586208	0	0.9916	ALIGNED	6.66	6.58	6.81	123771864	-1.2	0.9861	TRUE
sp|P02662|CASA1_BOVIN	QGLPQ	272.1423++	2	272.142	Q[+1]GLPQ	6.69	6.54	6.81	160326624	-0.3	0.9781	TRUE	6.59	6.52	6.8	164230032	-0.9	0.9808	TRUE	6.61	6.56	6.78	56403556	-0.5	0.974	ALIGNED	6.62	6.55	6.83	22341248	-0.5	0.9866	ALIGNED	6.65	6.57	6.84	106693136	-1.4	0.9858	ALIGNED	6.66	6.58	6.81	28877620	-1.9	0.9869	TRUE
sp|P02662|CASA1_BOVIN	QGLPQ	544.2613+	1	544.261	Q[+1]GLPQ[+1]	7.58	7.5	7.68	20976704	0.2	0.9701	TRUE	7.57	7.46	7.67	13018840	-0.1	0.897	ALIGNED	7.57	7.55	7.64	341864	-3.4	0.8584	ALIGNED	7.59	7.49	7.73	1010078	1	0.9821	ALIGNED	7.63	7.5	7.75	14233040	-0.4	0.9735	ALIGNED	7.62	7.56	7.76	515764	-1.5	0.8583	ALIGNED
sp|P02662|CASA1_BOVIN	QGLPQE	671.3359+	1	671.336	QGLPQE	7.14	7.03	7.24	68808616	0	0.9766	TRUE	7.15	7.02	7.23	135160896	-0.5	0.9813	TRUE	7.13	7.05	7.23	53108280	-0.4	0.9647	TRUE	7.19	6.94	7.32	442736	1.3	0.9333	ALIGNED	7.2	7.09	7.33	4705728	0.2	0.9675	TRUE	7.2	7.11	7.27	576365	0.2	0.9678	TRUE
sp|P02662|CASA1_BOVIN	QGLPQE	336.1716++	2	336.172	QGLPQE	7.14	7.03	7.24	24860756	0.8	0.9759	TRUE	7.15	7.02	7.23	43626492	0	0.9787	TRUE	7.13	7.05	7.23	18339504	0.5	0.9816	TRUE	7.19	6.94	7.32	540364	0.7	0.9286	ALIGNED	7.18	7.09	7.33	4049349	-0.9	0.9778	TRUE	7.2	7.11	7.27	669161	-1	0.9707	TRUE
sp|P02662|CASA1_BOVIN	GLPQ	414.2347+	1	414.235	GLPQ	5.51	5.42	5.63	635603392	-0.2	0.9514	TRUE	5.51	5.43	5.63	729598272	-0.9	0.9528	TRUE	5.52	5.45	5.65	755260096	-0.4	0.9515	TRUE	5.54	5.45	5.67	175359808	-0.3	0.989	TRUE	5.58	5.5	5.72	761984448	-1.2	0.9897	TRUE	5.6	5.51	5.71	130388056	-1.2	0.9875	TRUE
sp|P02662|CASA1_BOVIN	GLPQEVLN	435.2400++	2	435.24	GLPQEVLN								12.04	12	12.14	1524623	0.9	0.8135	ALIGNED								12.12	11.96	12.36	598709	1.2	0.9503	ALIGNED	12.1	11.98	12.38	8066295	2.8	0.9815	TRUE	12.08	11.96	12.38	14731062	1.4	0.9874	ALIGNED
sp|P02662|CASA1_BOVIN	LPQEVL	699.3923+	1	699.392	LPQ[+1]EVL																													13.19	13.07	13.36	8097488	1.7	0.936	ALIGNED	13.17	13.08	13.33	44251872	2	0.9885	TRUE
sp|P02662|CASA1_BOVIN	LPQEVL	350.1998++	2	350.2	LPQ[+1]EVL																						13.18	13.1	13.19	34583	0.5	0.9841	ALIGNED	13.19	13.07	13.36	3391595	1	0.8951	ALIGNED	13.17	13.08	13.33	18058512	1.5	0.9797	TRUE
sp|P02662|CASA1_BOVIN	LPQEVL	698.4083+	1	698.408	LPQEVL	12.6	12.58	12.88	2379185	3.3	0.8746	ALIGNED	12.61	12.54	12.91	6029048	0.9	0.9345	ALIGNED	12.81	12.54	12.84	384451	-3.7	0.9784	ALIGNED	12.59	12.5	12.7	4070815	1	0.9864	TRUE	12.6	12.5	12.74	83529304	0.1	0.9923	TRUE	12.58	12.47	12.72	434249856	-1.4	0.9936	TRUE
sp|P02662|CASA1_BOVIN	LPQEVL	349.7078++	2	349.708	LPQEVL																						12.59	12.5	12.7	3531975	0.9	0.9796	TRUE	12.59	12.5	12.74	49871996	0	0.9926	TRUE	12.58	12.47	12.72	246215296	-1.6	0.9942	TRUE
sp|P02662|CASA1_BOVIN	LPQEVLN	406.7293++	2	406.729	LPQEVLN																													10.47	10.39	10.59	2405551	0.5	0.9776	TRUE	10.46	10.37	10.59	7090836	-0.8	0.9905	TRUE
sp|P02662|CASA1_BOVIN	LPQEVLNENLL	641.3561++	2	641.356	LPQEVLNENLL																																				16.99	16.88	17.1	3382638	3.8	0.983	TRUE
sp|P02662|CASA1_BOVIN	PQEVL	586.3083+	1	586.308	PQ[+1]EVL																													14.46	14.29	14.68	2522831	2.7	0.971	ALIGNED	14.39	14.16	14.61	12414910	1	0.9618	TRUE
sp|P02662|CASA1_BOVIN	PQEVL	585.3243+	1	585.324	PQEVL								13.94	13.71	14.13	42254684	-1.9	0.8355	TRUE								13.89	13.77	14.11	2063454	3.3	0.9823	ALIGNED	13.89	13.75	14.17	44906396	0.5	0.9865	TRUE	13.85	13.72	14.12	141225696	-0.9	0.988	TRUE
sp|P02662|CASA1_BOVIN	PQEVLNENLL	584.8141++	2	584.814	PQEVLNENLL																													14.28	14.21	14.46	357257	2.3	0.9682	ALIGNED	14.23	14.13	14.36	10123241	1.7	0.9962	TRUE
sp|P02662|CASA1_BOVIN	EVLNENLLR	550.3089++	2	550.309	EVLNENLLR																						12.77	12.63	12.92	2060631	1.3	0.9843	ALIGNED	12.78	12.69	12.93	30305320	3.8	0.9976	TRUE	12.75	12.66	12.9	178472560	1.6	0.9945	TRUE
sp|P02662|CASA1_BOVIN	EVLNENLLR	367.2084+++	3	367.208	EVLNENLLR																						12.77	12.63	12.92	72573	1.2	0.9127	ALIGNED	12.78	12.69	12.93	1194625	2.3	0.9898	TRUE	12.75	12.66	12.9	7225257	0.6	0.9916	TRUE
sp|P02662|CASA1_BOVIN	EVLNENLLRF	624.3352++	2	624.335	EVLNEN[+1]LLRF																																				17.77	17.65	18.04	6064846	1.6	0.9823	TRUE
sp|P02662|CASA1_BOVIN	EVLNENLLRF	623.8431++	2	623.843	EVLNENLLRF																						17.41	17.3	17.59	2280420	1.7	0.9921	ALIGNED	17.37	17.26	17.54	12137171	3.9	0.9914	TRUE	17.31	17.22	17.49	231496672	1.8	0.9941	TRUE
sp|P02662|CASA1_BOVIN	EVLNENLLRF	416.2312+++	3	416.231	EVLNENLLRF																						17.41	17.3	17.59	262591	1.8	0.8621	ALIGNED	17.37	17.26	17.54	1092377	3.3	0.9693	TRUE	17.32	17.22	17.49	18556016	1.4	0.9899	TRUE
sp|P02662|CASA1_BOVIN	VLNENLLR	485.7876++	2	485.788	VLNENLLR																						11.64	11.5	11.75	3704395	0.4	0.9925	TRUE	11.66	11.59	11.83	16183244	-0.5	0.9886	TRUE	11.63	11.54	11.8	243675424	-0.4	0.9946	TRUE
sp|P02662|CASA1_BOVIN	VLNENLL	814.4669+	1	814.467	VLNENLL																						14.24	14.15	14.38	792905	2.3	0.961	ALIGNED	14.23	14.14	14.34	6344138	2.9	0.9851	TRUE	14.2	14.1	14.33	131617104	0.8	0.9936	TRUE
sp|P02662|CASA1_BOVIN	VLNENLL	407.7371++	2	407.737	VLNENLL																						14.26	14.15	14.38	1150608	2.1	0.9799	ALIGNED	14.23	14.14	14.34	6566739	2.4	0.9886	TRUE	14.2	14.1	14.33	130479104	0.5	0.9942	TRUE
sp|P02662|CASA1_BOVIN	VLNENLLRF	559.3218++	2	559.322	VLNENLLRF	16.97	16.77	17.2	5879990	4.8	0.8015	ALIGNED															16.72	16.63	16.83	5433703	2.1	0.9894	TRUE	16.71	16.62	16.89	19030388	5	0.9939	TRUE	16.66	16.55	16.84	498150112	0.5	0.9943	TRUE
sp|P02662|CASA1_BOVIN	VLNENLLRF	373.2170+++	3	373.217	VLNENLLRF																						16.72	16.63	16.83	134938	1.6	0.9356	TRUE	16.69	16.62	16.89	523896	4.4	0.9591	TRUE	16.66	16.55	16.84	12450372	-0.2	0.9864	TRUE
sp|P02662|CASA1_BOVIN	VLNENLLRF	559.8139++	2	559.814	VLN[+1]ENLLRF																													17.2	17.08	17.33	292343	-0.3	0.8796	ALIGNED	17.11	16.93	17.38	13523244	1.1	0.9901	TRUE
sp|P02662|CASA1_BOVIN	VLNENLLR	486.2796++	2	486.28	VLNEN[+1]LLR																						12.16	12.07	12.3	694304	-2.8	0.8527	ALIGNED	12.14	12.05	12.23	517191	-0.2	0.9409	ALIGNED	12.09	12.02	12.19	5313967	0.2	0.9811	TRUE
sp|P02662|CASA1_BOVIN	VLNENLLR	486.2796++	2	486.28	VLN[+1]ENLLR																													12.29	12.23	12.44	181493	0.6	0.902	ALIGNED	12.27	12.2	12.41	3586657	1.4	0.9724	TRUE
sp|P02662|CASA1_BOVIN	VLNEN	588.2988+	1	588.299	VLNEN								4.04	3.93	4.12	35287792	0.1	0.9742	ALIGNED	4.06	3.96	4.16	139210768	-0.3	0.9867	TRUE	4.1	4.03	4.25	2425644	1.4	0.9764	ALIGNED	4.15	4.09	4.27	10225836	-0.5	0.981	ALIGNED
sp|P02662|CASA1_BOVIN	LNENLLRF	509.7876++	2	509.788	LNENLLRF																						15.95	15.8	16.15	2274581	4	0.9685	ALIGNED	15.94	15.84	16.16	9769893	4.6	0.9925	ALIGNED	15.9	15.79	16.08	130312368	2.1	0.9946	TRUE
sp|P02662|CASA1_BOVIN	LNENLLR	436.2534++	2	436.253	LNENLLR																						10.46	10.35	10.56	1771914	0	0.9712	ALIGNED	10.46	10.37	10.62	6636549	0	0.9808	TRUE	10.44	10.37	10.61	44293252	-0.3	0.9925	TRUE
sp|P02662|CASA1_BOVIN	LNENLLRF	510.2796++	2	510.28	LNEN[+1]LLRF	16.21	15.93	16.46	11886672	-2	0.9089	ALIGNED								16.18	15.98	16.45	7840167	0.2	0.8719	ALIGNED								16.42	16.34	16.58	186299	2.6	0.973	ALIGNED	16.39	16.23	16.56	4146111	1.8	0.9793	TRUE
sp|P02662|CASA1_BOVIN	LNENL	301.6608++	2	301.661	LNENL	8.62	8.56	8.73	43030316	0	0.9683	ALIGNED	8.6	8.55	8.72	88464272	-0.6	0.9889	TRUE	8.65	8.52	8.79	38883684	0	0.9783	TRUE	8.69	8.62	8.81	1970045	-0.5	0.9818	ALIGNED	8.73	8.64	8.82	4549024	-1	0.9847	ALIGNED	8.72	8.64	8.83	12330301	-1.7	0.9812	ALIGNED
sp|P02662|CASA1_BOVIN	LNENLL	715.3985+	1	715.398	LNENLL	13.18	13.1	13.3	11799343	-2	0.9565	ALIGNED	13.17	13.09	13.29	12145960	-1.7	0.9699	TRUE								13.14	13.03	13.25	860228	1.5	0.9935	ALIGNED	13.16	13.07	13.28	7690705	1.5	0.9919	TRUE	13.12	13.04	13.25	54634852	1.2	0.9923	TRUE
sp|P02662|CASA1_BOVIN	LNENLL	358.2029++	2	358.203	LNENLL	13.21	13.1	13.3	4052615	-1.1	0.936	ALIGNED	13.19	13.09	13.29	4824290	-2.2	0.944	TRUE								13.14	13.03	13.25	665702	1.2	0.9624	ALIGNED	13.14	13.07	13.28	4912087	0.9	0.9939	TRUE	13.12	13.04	13.25	36382836	0.7	0.9929	TRUE
sp|P02662|CASA1_BOVIN	LNEN	489.2304+	1	489.23	LNEN	1.55	1.43	1.67	100060184	-1	0.9809	ALIGNED	1.56	1.43	1.68	180521152	-1.2	0.9789	TRUE	1.56	1.42	1.68	407541056	-0.8	0.9848	TRUE	1.56	1.49	1.73	5504975	-0.7	0.9218	ALIGNED	1.62	1.51	1.75	21047098	-0.9	0.9822	ALIGNED	1.64	1.57	1.75	23789756	-0.9	0.9833	ALIGNED
sp|P02662|CASA1_BOVIN	NENLL	602.3144+	1	602.314	NENLL	11.04	10.95	11.12	66487544	-0.1	0.9409	TRUE	11	10.93	11.1	215570432	-0.6	0.9797	TRUE	11.03	10.93	11.11	9549496	0.5	0.8303	ALIGNED	11.09	11.01	11.21	15786752	1.2	0.985	TRUE	11.11	11.02	11.26	328207008	-0.6	0.992	TRUE	11.09	11	11.23	863874688	-2	0.9921	TRUE
sp|P02662|CASA1_BOVIN	NENLL	301.6608++	2	301.661	NENLL	11.02	10.95	11.12	4177738	-0.7	0.8856	TRUE	11	10.93	11.1	16159738	-0.9	0.9497	TRUE	11.04	10.93	11.11	515633	-4	0.8925	ALIGNED	11.08	11.01	11.21	4183946	0.4	0.9859	TRUE	11.11	11.02	11.26	58262136	-1	0.9858	TRUE	11.09	11	11.23	137403808	-2.3	0.9882	TRUE
sp|P02662|CASA1_BOVIN	NENLL	603.2984+	1	603.298	N[+1]ENLL								11.45	11.33	11.53	5688156	-1.5	0.9255	ALIGNED								11.41	11.32	11.6	2708864	-0.3	0.9825	ALIGNED	11.41	11.31	11.49	8888401	-0.9	0.9851	TRUE	11.39	11.29	11.47	17867756	-1.1	0.9867	TRUE
sp|P02662|CASA1_BOVIN	NENLLRF	453.7376++	2	453.738	N[+1]ENLLRF								15.69	15.49	15.87	69840400	4.9	0.9945	ALIGNED	15.59	15.53	15.78	781421	5	0.8559	ALIGNED	15.41	15.24	15.5	227183	0.9	0.9582	ALIGNED	15.37	15.29	15.52	5637855	2.2	0.9857	TRUE	15.34	15.25	15.59	56165488	3.6	0.9942	TRUE
sp|P02662|CASA1_BOVIN	NENLLRFF	526.7798++	2	526.78	NENLLRFF																																				18.75	18.66	18.97	38984784	-0.3	0.9913	TRUE
sp|P02662|CASA1_BOVIN	NENLLRF	453.7376++	2	453.738	NEN[+1]LLRF																													15.1	15	15.28	4994262	0.8	0.9892	TRUE	15.07	14.97	15.24	62449276	0	0.9906	TRUE
sp|P02662|CASA1_BOVIN	NENLLRF	905.4839+	1	905.484	NENLLRF																						14.57	14.48	14.72	1448337	1.5	0.9828	TRUE	14.59	14.5	14.78	29628166	-0.7	0.9892	TRUE	14.55	14.43	14.75	454706656	-2.3	0.9938	TRUE
sp|P02662|CASA1_BOVIN	NENLLRF	453.2456++	2	453.246	NENLLRF															14.68	14.58	14.77	358341	1.5	0.8835	ALIGNED	14.57	14.48	14.72	53023524	1.1	0.993	TRUE	14.59	14.5	14.78	523771264	-0.4	0.9947	TRUE	14.55	14.43	14.75	4094318336	-1.9	0.994	TRUE
sp|P02662|CASA1_BOVIN	NENLLR	758.4155+	1	758.416	NENLLR																						7.87	7.75	8.01	564326	-0.3	0.9873	TRUE	7.93	7.83	8.09	10487013	-0.9	0.9888	TRUE	7.9	7.83	8.1	31661378	-1.5	0.9901	TRUE
sp|P02662|CASA1_BOVIN	NENLLR	379.7114++	2	379.711	NENLLR																						7.87	7.75	8.01	8319204	-0.2	0.9903	TRUE	7.92	7.83	8.09	75454480	-1.1	0.9952	TRUE	7.9	7.83	8.1	290988768	-1.3	0.9938	TRUE
sp|P02662|CASA1_BOVIN	NENLLR	380.2034++	2	380.203	NEN[+1]LLR																						8.41	8.32	8.52	60391	-0.3	0.8187	ALIGNED	8.45	8.36	8.56	1028135	0.7	0.9616	ALIGNED	8.45	8.34	8.55	5818202	-0.7	0.984	TRUE
sp|P02662|CASA1_BOVIN	ENLLRFF	469.7584++	2	469.758	ENLLRFF																																				18.77	18.67	18.97	23327240	-0.2	0.9875	TRUE
sp|P02662|CASA1_BOVIN	ENLLR	644.3726+	1	644.373	ENLLR																						7.59	7.52	7.73	839256	0.9	0.9769	TRUE	7.67	7.58	7.85	22537028	-0.9	0.9896	TRUE	7.67	7.57	7.84	38314180	-1.3	0.9809	TRUE
sp|P02662|CASA1_BOVIN	ENLLR	322.6899++	2	322.69	ENLLR	7.6	7.54	7.7	189161	0.3	0.8399	ALIGNED	7.63	7.52	7.66	656250	0.3	0.9625	ALIGNED								7.61	7.52	7.73	8151654	0.5	0.9825	TRUE	7.67	7.58	7.85	66778204	-1.2	0.9891	TRUE	7.67	7.57	7.84	194046336	-1.7	0.9897	TRUE
sp|P02662|CASA1_BOVIN	ENLLRF	791.4410+	1	791.441	ENLLRF								14.65	14.65	14.86	672056	3.9	0.9269	ALIGNED								14.62	14.52	14.77	1759822	1.6	0.9888	TRUE	14.64	14.54	14.83	30316690	-0.7	0.9878	TRUE	14.58	14.47	14.8	331152256	-2.4	0.9916	TRUE
sp|P02662|CASA1_BOVIN	ENLLRF	396.2241++	2	396.224	ENLLRF	14.75	14.66	14.8	686138	-0.7	0.9234	ALIGNED	14.75	14.65	14.86	615893	-3.1	0.8717	ALIGNED								14.62	14.52	14.77	38753888	1.4	0.994	TRUE	14.63	14.54	14.83	353388128	-0.4	0.9953	TRUE	14.58	14.47	14.8	2373551360	-1.8	0.9929	TRUE
sp|P02662|CASA1_BOVIN	ENLLR	323.1819++	2	323.182	EN[+1]LLR	8.04	7.93	8.07	202119	1.7	0.8134	ALIGNED																						8.17	8.08	8.3	854637	-0.2	0.851	ALIGNED	8.16	8.08	8.33	3076553	-1	0.9786	TRUE
sp|P02662|CASA1_BOVIN	ENLLRF	396.7162++	2	396.716	EN[+1]LLRF																													15.17	15.05	15.33	2999465	0.1	0.9928	TRUE	15.12	15.02	15.3	30779636	-0.1	0.9842	TRUE
sp|P02662|CASA1_BOVIN	NLLR	515.3300+	1	515.33	NLLR																						6.66	6.56	6.78	2658081	0.1	0.9753	TRUE	6.72	6.63	6.9	43309956	-0.3	0.9822	TRUE	6.72	6.64	6.92	25540516	-0.4	0.9823	TRUE
sp|P02662|CASA1_BOVIN	NLLR	258.1686++	2	258.169	NLLR																						6.66	6.56	6.78	8475845	0.1	0.9722	TRUE	6.72	6.63	6.9	60148980	-0.5	0.9777	TRUE	6.72	6.64	6.92	61879512	-0.7	0.9797	TRUE
sp|P02662|CASA1_BOVIN	NLLRF	662.3984+	1	662.398	NLLRF																						13.97	13.86	14.11	4915877	1.2	0.9877	TRUE	14.02	13.92	14.24	32211376	1.2	0.9897	TRUE	13.96	13.88	14.19	115742416	-0.5	0.9895	TRUE
sp|P02662|CASA1_BOVIN	NLLRF	331.7028++	2	331.703	NLLRF																						13.97	13.86	14.11	55002664	0.6	0.991	TRUE	14.02	13.92	14.24	227732752	0.8	0.9947	TRUE	13.98	13.88	14.19	708930752	-0.6	0.993	TRUE
sp|P02662|CASA1_BOVIN	NLLRFF	405.2371++	2	405.237	NLLRFF																													18.26	18.17	18.55	183945	1.1	0.9375	ALIGNED	18.19	18.08	18.42	55122380	0.1	0.9956	TRUE
sp|P02662|CASA1_BOVIN	LLR	401.2871+	1	401.287	LLR	8.74	8.64	8.87	777816256	-0.1	0.9743	TRUE	8.73	8.63	8.86	1112524544	-0.5	0.9765	TRUE	3.51	3.43	3.64	16762906	0	0.9527	TRUE	8.77	8.68	8.9	18380616	0.7	0.9751	TRUE	8.9	8.79	9.1	47518028	0.6	0.9775	TRUE	8.89	8.78	9.12	7495778	0	0.9667	TRUE
sp|P02662|CASA1_BOVIN	LLR	201.1472++	2	201.147	LLR	8.74	8.64	8.87	346676544	0	0.9843	TRUE	8.73	8.63	8.86	452106784	-0.3	0.9917	TRUE	3.5	3.43	3.64	5496007	-0.2	0.9736	TRUE	8.77	8.68	8.9	14574016	1	0.9925	TRUE	8.9	8.79	9.1	33156192	1	0.9902	TRUE	8.89	8.78	9.12	5770873	0	0.9818	TRUE
sp|P02662|CASA1_BOVIN	LLRF	548.3555+	1	548.355	LLRF																													12.52	12.41	12.74	11939780	1.4	0.9786	TRUE	14.58	14.48	14.81	120629144	-1.8	0.9846	TRUE
sp|P02662|CASA1_BOVIN	LLRFF	348.2156++	2	348.216	LLRFF																						16.81	16.66	17.01	315781	2.7	0.9759	ALIGNED	16.82	16.66	17.02	411310	3.2	0.9741	ALIGNED	16.76	16.65	17	93478032	1.9	0.9921	TRUE
sp|P02662|CASA1_BOVIN	LRFF	582.3398+	1	582.34	LRFF	16.81	16.72	16.85	122934	-4.2	0.8186	ALIGNED																													14.59	14.5	14.79	331715360	-1.9	0.9859	TRUE
sp|P02662|CASA1_BOVIN	FFVAPFPE	477.2420++	2	477.242	FFVAPFPE																													18.45	18.32	18.57	855180	4.8	0.9887	ALIGNED	18.39	18.26	18.57	2483092	4.6	0.9892	TRUE
sp|P02662|CASA1_BOVIN	FVAPF	580.3130+	1	580.313	FVAPF	15.92	15.54	16.1	108172056	0.7	0.9857	TRUE	15.9	15.73	16.08	152369296	0.3	0.9911	TRUE	15.81	15.67	16.02	166331376	0.7	0.9913	TRUE								15.79	15.66	15.97	5357941	2	0.993	TRUE	15.77	15.63	15.94	9317108	0.5	0.997	TRUE
sp|P02662|CASA1_BOVIN	FVAPFPE	806.4083+	1	806.408	FVAPFPE	15.3	15.19	15.4	51127084	-1	0.9874	TRUE	15.28	15.16	15.41	81595504	-1.4	0.9845	TRUE	15.2	15.09	15.33	104098976	-0.6	0.9899	TRUE	15.21	15.1	15.35	139086480	-0.1	0.9941	TRUE	15.17	15.07	15.33	273366624	-0.6	0.9954	TRUE	15.15	15.04	15.29	605882496	-1	0.9944	TRUE
sp|P02662|CASA1_BOVIN	FVAPFPE	403.7078++	2	403.708	FVAPFPE	15.27	15.19	15.4	37526296	0.3	0.9963	TRUE	15.26	15.16	15.41	60660716	-0.7	0.9652	TRUE	15.2	15.09	15.33	81785360	0	0.9863	TRUE	15.21	15.1	15.35	181709552	0.1	0.9949	TRUE	15.17	15.07	15.33	283368960	-0.6	0.9947	TRUE	15.15	15.04	15.29	584680448	-1	0.9956	TRUE
sp|P02662|CASA1_BOVIN	FVAPFPEVFGKE	683.8557++	2	683.856	FVAPFPEVFGKE																						18.28	18.16	18.43	17262780	0.2	0.9953	TRUE	18.24	18.09	18.42	11950317	-0.3	0.9917	TRUE	18.17	18.02	18.37	8884774	0.2	0.9937	TRUE
sp|P02662|CASA1_BOVIN	FVAP	433.2445+	1	433.245	FVAP	9.39	9.28	9.53	11802272	-1.1	0.9844	ALIGNED	9.37	9.25	9.53	18369868	-1	0.9943	ALIGNED	9.39	9.26	9.54	35065544	-0.3	0.9727	TRUE	9.4	9.31	9.64	15686312	0.7	0.9813	ALIGNED	9.45	9.33	9.68	33866936	1.8	0.9835	ALIGNED	9.42	9.32	9.64	20084174	0.1	0.9654	ALIGNED
sp|P02662|CASA1_BOVIN	FVAPFPEV	905.4767+	1	905.477	FVAPFPEV	18.07	17.93	18.25	945047936	-2.4	0.9952	TRUE	18.09	17.92	18.24	1458912512	-2.6	0.9956	TRUE	18	17.84	18.17	885479040	-2	0.9947	TRUE	17.96	17.82	18.11	1699431	2.1	0.9862	ALIGNED	17.9	17.76	18.07	3160705	3.9	0.9871	TRUE	17.84	17.7	18.03	10013180	1.3	0.9874	TRUE
sp|P02662|CASA1_BOVIN	FVAPFPEV	453.2420++	2	453.242	FVAPFPEV	18.07	17.93	18.25	835613696	-2.4	0.9914	TRUE	18.07	17.92	18.24	1213296128	-2.5	0.9938	TRUE	17.99	17.84	18.17	907725568	-2.1	0.9943	TRUE	17.96	17.82	18.11	4021368	2.1	0.9897	ALIGNED	17.9	17.76	18.07	6137826	2.7	0.9958	TRUE	17.84	17.7	18.03	17225042	0.8	0.9902	TRUE
sp|P02662|CASA1_BOVIN	FVAPFPEVFG	1109.5666+	1	1109.57	FVAPFPEVFG	21.22	21.12	21.34	95220160	-1.3	0.9916	TRUE	21.18	21.09	21.31	257462640	-1.6	0.9966	TRUE	21.08	20.98	21.2	202249760	-1.1	0.9928	TRUE	20.83	20.71	21	6422148	3.1	0.9923	ALIGNED	20.78	20.66	20.93	12249263	3.8	0.9929	TRUE	20.72	20.58	20.87	8705138	4.2	0.9904	ALIGNED
sp|P02662|CASA1_BOVIN	FVAPFPEVFG	555.2869++	2	555.287	FVAPFPEVFG	21.23	21.12	21.34	94198008	-1.7	0.9957	TRUE	21.19	21.09	21.31	259574208	-1.9	0.9945	TRUE	21.08	20.98	21.2	200277376	-1.5	0.9976	TRUE	20.83	20.71	21	35055296	2.5	0.9952	ALIGNED	20.76	20.66	20.93	50723720	3	0.9968	TRUE	20.71	20.58	20.87	36681292	3.3	0.9958	ALIGNED
sp|P02662|CASA1_BOVIN	FVAPFP	677.3657+	1	677.366	FVAPFP															16.28	16.11	16.47	4818142	-2.6	0.8866	ALIGNED	16.25	16.09	16.78	37565824	1.5	0.987	TRUE	16.24	16.06	16.76	74715648	0.6	0.9884	TRUE	16.22	16.02	16.72	144873648	0.5	0.994	TRUE
sp|P02662|CASA1_BOVIN	FVAPFP	339.1865++	2	339.187	FVAPFP																						16.27	16.09	16.78	18698326	1	0.9904	TRUE	16.24	16.06	16.76	29720426	0.2	0.9883	TRUE	16.22	16.02	16.72	55724416	0.3	0.9879	TRUE
sp|P02662|CASA1_BOVIN	FVAPFPEVFGKEK	498.9379+++	3	498.938	FVAPFPEVFGKEK																						16.39	16.25	16.54	9473507	1.5	0.9964	TRUE	16.34	16.22	16.56	14556776	1	0.999	TRUE	16.31	16.2	16.47	4347094	0.4	0.9905	TRUE
sp|P02662|CASA1_BOVIN	FVAPFPEVF	1052.5451+	1	1052.55	FVAPFPEVF																						21.23	21.11	21.4	6574754	3.3	0.9936	TRUE								21.12	21	21.29	354624224	-2	0.9948	TRUE
sp|P02662|CASA1_BOVIN	FVAPFPEVF	526.7762++	2	526.776	FVAPFPEVF								21.5	21.31	21.84	7451979	-0.8	0.9914	ALIGNED	21.37	21.19	21.77	4977374	-1.5	0.972	ALIGNED	21.23	21.11	21.4	25935034	2.8	0.9943	TRUE	21.18	21.05	21.34	17225082	4.2	0.9948	TRUE	21.12	21	21.29	834827776	-1.3	0.9946	TRUE
sp|P02662|CASA1_BOVIN	FVAPFPEVFGK	619.3344++	2	619.334	FVAPFPEVFGK															18.3	18.2	18.46	6836107	-0.5	0.9829	ALIGNED	18.22	18.07	18.36	25164458	1.1	0.9955	TRUE	18.18	18.06	18.36	144496704	0.1	0.9961	TRUE	18.11	17.99	18.31	29131346	0.6	0.9913	TRUE
sp|P02662|CASA1_BOVIN	VAPFP	530.2973+	1	530.297	VAPFP								12.17	11.96	12.65	86728272	-0.4	0.9833	ALIGNED	12.18	11.9	12.64	137687424	0.2	0.9817	TRUE	12.18	11.61	12.77	39926948	1.5	0.9475	TRUE	12.17	11.88	12.75	59649664	1.3	0.9889	ALIGNED	12.18	11.88	12.73	123742664	0.4	0.9904	TRUE
sp|P02662|CASA1_BOVIN	VAPFPEVFGKEKVNEL	601.6611+++	3	601.661	VAPFPEVFGKEKVNEL																																				16.17	16.06	16.41	69938328	0.3	0.9983	TRUE
sp|P02662|CASA1_BOVIN	VAPFPEVFGKEKVN	520.9522+++	3	520.952	VAPFPEVFGKEKVN																						14.26	14.15	14.4	913593	0.9	0.9907	ALIGNED	14.26	14.12	14.43	883362	-1.2	0.9494	ALIGNED	14.2	14.09	14.44	7279087	1.3	0.9858	TRUE
sp|P02662|CASA1_BOVIN	VAPFPEVF	905.4767+	1	905.477	VAPFPEVF	19	18.85	19.12	34596000	-1	0.984	ALIGNED	18.97	18.8	19.14	78922640	-1.2	0.994	TRUE	18.87	18.75	19.03	35226468	-0.6	0.9864	TRUE	18.8	18.67	19	25798844	1.7	0.9906	TRUE	18.75	18.62	18.96	33476222	2.8	0.993	TRUE	18.7	18.54	18.9	934550400	-2.2	0.995	TRUE
sp|P02662|CASA1_BOVIN	VAPFPEVF	453.2420++	2	453.242	VAPFPEVF	18.99	18.85	19.12	18534374	-0.9	0.9807	ALIGNED	18.96	18.8	19.14	41084212	-1	0.9648	TRUE	18.87	18.75	19.03	19471148	-0.6	0.9672	TRUE	18.8	18.67	19	45791548	1.8	0.9942	TRUE	18.75	18.62	18.96	45213668	2.2	0.9949	TRUE	18.7	18.54	18.9	969584384	-1.9	0.995	TRUE
sp|P02662|CASA1_BOVIN	VAPFPEVFGKE	610.3215++	2	610.322	VAPFPEVFGKE	16.01	15.77	16.21	14630964	0.7	0.9316	ALIGNED	16.02	15.91	16.22	12317983	-0.6	0.9868	ALIGNED								15.88	15.62	16.02	24316180	2.1	0.9081	TRUE	15.84	15.73	16.06	10731446	3.4	0.9842	TRUE	15.79	15.69	15.99	39645544	0.8	0.9976	TRUE
sp|P02662|CASA1_BOVIN	VAPFPE	659.3399+	1	659.34	VAPFPE	11.48	11.21	11.79	1461406848	0.2	0.9915	TRUE	11.49	11.24	11.73	1602715136	-0.2	0.9928	TRUE	11.45	11.21	11.76	1864662528	-0.1	0.9928	TRUE	11.46	11.22	11.78	264021728	0	0.9948	TRUE	11.43	11.22	11.77	503778848	-0.1	0.9944	TRUE	11.44	11.21	11.74	1009811328	-1.2	0.9949	TRUE
sp|P02662|CASA1_BOVIN	VAPFPE	330.1736++	2	330.174	VAPFPE	11.48	11.21	11.79	366241600	-0.5	0.9881	TRUE	11.49	11.24	11.73	404860384	-0.9	0.9878	TRUE	11.44	11.21	11.76	514929824	-0.6	0.992	TRUE	11.44	11.22	11.78	143837392	-0.4	0.9863	TRUE	11.44	11.22	11.77	216299456	-0.9	0.9753	TRUE	11.44	11.21	11.74	426250208	-1.9	0.9733	TRUE
sp|P02662|CASA1_BOVIN	VAPFPEV	758.4083+	1	758.408	VAPFPEV	14.97	14.77	15.2	15000041472	-1.1	0.9955	TRUE	14.9	14.75	15.18	20357525504	-1.7	0.9962	TRUE	14.91	14.73	15.14	14524474368	-0.7	0.995	TRUE	14.96	14.8	15.16	2996633	2.4	0.9884	ALIGNED	14.94	14.78	15.11	5009967	4.8	0.9863	TRUE	14.91	14.71	15.11	23847558	4	0.9875	TRUE
sp|P02662|CASA1_BOVIN	VAPFPEV	379.7078++	2	379.708	VAPFPEV	14.93	14.77	15.2	5042707968	-1.1	0.9928	TRUE	14.9	14.75	15.18	6531192320	-1.7	0.9945	TRUE	14.9	14.73	15.14	5286432256	-0.6	0.9941	TRUE	14.96	14.8	15.16	2867651	1.8	0.9845	ALIGNED	14.94	14.78	15.11	4170593	3.2	0.9829	TRUE	14.91	14.71	15.11	17904140	3.1	0.9845	TRUE
sp|P02662|CASA1_BOVIN	VAPFPEVFGKEK	449.9151+++	3	449.915	VAPFPEVFGKEK																						13.93	13.82	14.05	5100261	1.2	0.9932	TRUE	13.93	13.78	14.25	5572417	0.3	0.9908	TRUE	13.86	13.75	14.01	7424397	-1.2	0.9766	TRUE
sp|P02662|CASA1_BOVIN	VAPFPEVFG	481.7527++	2	481.753	VAPFPEVFG	18.46	18.32	18.66	3020283392	-0.4	0.9954	TRUE	18.45	18.3	18.64	6928828928	-0.9	0.9965	TRUE	18.36	18.22	18.56	4711059456	-0.4	0.9956	TRUE	18.33	18.18	18.52	118158656	0.6	0.9947	TRUE	18.28	18.13	18.46	154547504	0.5	0.9952	TRUE	18.23	18.06	18.41	175879552	1.1	0.9951	TRUE
sp|P02662|CASA1_BOVIN	VAPFPEVFGK	545.8002++	2	545.8	VAPFPEVFGK	15.91	15.73	16.08	10201888	0.8	0.9911	ALIGNED	15.91	15.76	16.06	11375534	0.5	0.9851	ALIGNED	15.84	15.71	16.2	8262859	0.5	0.9927	ALIGNED	15.77	15.62	15.95	22052598	1.5	0.9954	TRUE	15.73	15.6	15.94	115378744	1.6	0.996	TRUE	15.69	15.52	15.9	38850160	1.1	0.9832	TRUE
sp|P02662|CASA1_BOVIN	VAPF	433.2445+	1	433.245	VAPF	10.49	10.33	10.86	168674960	-0.1	0.9781	TRUE	10.47	10.31	10.7	237923936	-0.6	0.9821	TRUE	10.51	10.34	10.75	349325280	0	0.9812	TRUE	10.54	10.45	10.67	114697	0.6	0.8292	ALIGNED	10.67	10.49	10.74	669252	0.7	0.9204	ALIGNED	10.6	10.39	11	2764969	0.9	0.9626	ALIGNED
sp|P02662|CASA1_BOVIN	APFPEVFGK	496.2660++	2	496.266	APFPEVFGK																						14.72	14.6	14.89	43177712	2	0.9943	TRUE	14.69	14.59	14.89	191256976	0.9	0.9962	TRUE	14.67	14.57	14.85	25682344	-0.7	0.9898	TRUE
sp|P02662|CASA1_BOVIN	APF	334.1761+	1	334.176	APF	8.14	7.96	8.48	183451200	-0.4	0.9854	ALIGNED	8.14	7.96	8.45	201350112	-0.9	0.9918	TRUE	8.17	7.99	8.5	220529168	-0.4	0.9837	TRUE	8.18	8.04	8.44	1562440	0.2	0.9365	ALIGNED	8.25	8.07	8.48	4380948	0.2	0.976	ALIGNED	8.25	8.08	8.5	886500	-0.2	0.9664	ALIGNED
sp|P02662|CASA1_BOVIN	APFP	431.2289+	1	431.229	APFP																						10.15	9.93	10.31	15778312	0.8	0.962	TRUE	10.2	9.98	11.5	69387920	0.5	0.9799	TRUE	10.26	9.83	11.21	20533680	0.5	0.9491	TRUE
sp|P02662|CASA1_BOVIN	APFPEV	659.3399+	1	659.34	APFPEV	13.83	13.69	14.01	1221505024	-0.7	0.9928	TRUE	13.8	13.66	14.04	797382912	-0.9	0.9898	TRUE	13.77	13.58	14	837832064	-0.4	0.9941	TRUE	13.73	13.59	13.93	36385240	1.3	0.99	TRUE	13.74	13.6	13.96	28727672	2.2	0.9876	TRUE	13.7	13.58	13.9	16300398	0.5	0.98	TRUE
sp|P02662|CASA1_BOVIN	APFPEV	330.1736++	2	330.174	APFPEV	13.83	13.69	14.01	197680000	-0.2	0.988	TRUE	13.81	13.66	14.04	124210912	-0.5	0.9888	TRUE	13.77	13.58	14	147450176	0	0.9842	TRUE	13.73	13.59	13.93	12106534	0.8	0.961	TRUE	13.74	13.6	13.96	8105785	1.4	0.9759	TRUE	13.7	13.58	13.9	4512315	0.1	0.9912	TRUE
sp|P02662|CASA1_BOVIN	APFPEVFGKE	560.7873++	2	560.787	APFPEVFGKE								14.75	14.73	14.87	107452	-0.7	0.8017	ALIGNED								14.85	14.74	15.01	21011832	1.9	0.9951	TRUE	14.84	14.72	15	7515535	3.7	0.9932	TRUE	14.79	14.71	14.98	17153972	3.2	0.9891	TRUE
sp|P02662|CASA1_BOVIN	APFPEVFG	863.4298+	1	863.43	APFPEVFG	17.42	17.28	17.61	1006353792	-0.7	0.9942	TRUE	17.42	17.27	17.6	597645376	-0.7	0.9933	TRUE	17.34	17.19	17.53	125045936	0.7	0.9909	TRUE	17.31	17.15	17.49	360861504	-0.8	0.9946	TRUE	17.23	17.09	17.45	342515520	-1	0.995	TRUE	17.2	16.99	17.53	84407392	1.3	0.9927	TRUE
sp|P02662|CASA1_BOVIN	APFPEVFG	432.2185++	2	432.219	APFPEVFG	17.42	17.28	17.61	391552736	-0.3	0.9938	TRUE	17.42	17.27	17.6	220718416	-0.3	0.9946	TRUE	17.34	17.19	17.53	60153412	0.9	0.9791	TRUE	17.31	17.15	17.49	266741488	-0.5	0.9945	TRUE	17.25	17.09	17.45	195438000	-0.7	0.9947	TRUE	17.2	16.99	17.53	57771440	1.4	0.9909	TRUE
sp|P02662|CASA1_BOVIN	APFPEVFGKEK	416.8923+++	3	416.892	APFPEVFGKEK																						12.91	12.8	13.05	9738790	1.5	0.9937	TRUE								12.87	12.78	13.1	2395739	2.5	0.995	ALIGNED
sp|P02662|CASA1_BOVIN	APFPEVF	806.4083+	1	806.408	APFPEVF	17.63	17.5	17.88	3201637	-0.2	0.9305	ALIGNED	17.62	17.4	17.71	2897205	4.3	0.9132	ALIGNED								17.86	17.71	18.04	111933928	0.3	0.994	TRUE	17.82	17.67	18	113496736	0.4	0.9943	TRUE	17.74	17.6	17.94	701412096	-0.9	0.9955	TRUE
sp|P02662|CASA1_BOVIN	APFPEVF	403.7078++	2	403.708	APFPEVF								17.65	17.4	17.71	1693350	4.2	0.936	ALIGNED								17.86	17.71	18.04	57949072	0.4	0.9941	TRUE	17.82	17.67	18	46732816	0.1	0.9915	TRUE	17.74	17.6	17.94	256032752	-1	0.993	TRUE
sp|P02662|CASA1_BOVIN	APFPE	560.2715+	1	560.271	APFPE																						9.8	9.59	10.08	748714240	-0.3	0.996	TRUE	9.83	9.6	10.09	885913408	-0.4	0.9961	TRUE	9.81	9.59	10.08	280757984	-0.5	0.9922	TRUE
sp|P02662|CASA1_BOVIN	APFPE	280.6394++	2	280.639	APFPE	9.75	9.59	10.1	97415824	-0.5	0.9828	TRUE	9.73	9.54	10.03	28400436	-0.8	0.9708	TRUE	9.73	9.41	9.82	7929520	-0.7	0.9236	TRUE	9.79	9.59	10.08	111500568	-0.9	0.9903	TRUE	9.81	9.6	10.09	98079600	-0.8	0.988	TRUE	9.81	9.59	10.08	37012452	-0.6	0.9794	TRUE
sp|P02662|CASA1_BOVIN	PFPE	489.2344+	1	489.234	PFPE	9.08	8.89	9.2	93300944	4.5	0.9502	ALIGNED															11.46	11.2	11.78	13571812	0.1	0.9824	TRUE	8.68	8.22	8.95	26702340	0.8	0.9879	TRUE	11.43	11.26	11.73	42601112	-1.2	0.9838	TRUE
sp|P02662|CASA1_BOVIN	PFPEVFGK	460.7475++	2	460.747	PFPEVFGK																						15.75	15.62	15.88	388829	1.4	0.9571	ALIGNED	15.74	15.61	15.95	2560592	1.2	0.9885	TRUE	15.7	15.54	15.86	834720	0.6	0.9697	ALIGNED
sp|P02662|CASA1_BOVIN	PFPEV	588.3028+	1	588.303	PFPEV	14.96	14.67	15.17	779761024	0.2	0.9875	TRUE	14.9	14.65	15.25	993683136	-0.3	0.9901	TRUE	14.91	14.62	15.17	762974400	0.8	0.9851	TRUE								14.93	14.78	15.12	402889	3.8	0.9545	ALIGNED	14.89	14.67	15.13	1932509	3.3	0.9739	ALIGNED
sp|P02662|CASA1_BOVIN	PFPEVFG	792.3927+	1	792.393	PFPEVFG	18.46	18.34	18.66	49327092	-1	0.9889	ALIGNED	18.43	18.31	18.64	110529888	-1.5	0.9939	TRUE	18.36	18.22	18.56	74883904	-1.1	0.9918	TRUE	18.31	18.18	18.47	1373665	0.7	0.9875	ALIGNED	18.27	18.15	18.44	2150810	0.2	0.9832	ALIGNED	18.22	18.06	18.4	2454294	0.9	0.9886	ALIGNED
sp|P02662|CASA1_BOVIN	PFPEVFG	396.7000++	2	396.7	PFPEVFG	18.47	18.34	18.66	15501142	-1.1	0.9774	ALIGNED	18.43	18.31	18.64	35231296	-1.6	0.991	TRUE	18.38	18.22	18.56	23574282	-1.2	0.9835	TRUE								18.27	18.15	18.44	767359	-0.4	0.9594	ALIGNED	18.22	18.06	18.4	855964	1.8	0.9648	ALIGNED
sp|P02662|CASA1_BOVIN	FPEVFGKE	476.7424++	2	476.742	FPEVFGKE	13.3	13.25	13.42	881228	-4.8	0.8691	ALIGNED	13.27	13.16	13.37	796105	-1.8	0.8713	ALIGNED								13.32	13.16	13.45	6113780	2	0.9847	TRUE	13.32	13.18	13.48	3094789	3.2	0.9842	TRUE	13.3	13.11	13.47	5515052	3.9	0.9925	TRUE
sp|P02662|CASA1_BOVIN	FPEVFG	695.3399+	1	695.34	FPEVFG	15.71	15.6	15.87	355082560	0.5	0.997	TRUE	15.7	15.59	15.87	278991680	0.4	0.989	TRUE	15.63	15.51	15.76	33746592	1.7	0.9783	TRUE	15.61	15.5	15.79	223032112	-0.1	0.9941	TRUE	15.56	15.47	15.76	370093568	-0.3	0.9958	TRUE	15.54	15.43	15.71	33125482	2.2	0.9905	TRUE
sp|P02662|CASA1_BOVIN	FPEVFG	348.1736++	2	348.174	FPEVFG	15.71	15.6	15.87	60654436	-0.3	0.9838	TRUE	15.7	15.59	15.87	48082060	-0.5	0.9832	TRUE	15.63	15.51	15.76	6165091	0.1	0.9547	TRUE	15.61	15.5	15.79	68108512	-0.4	0.9854	TRUE	15.56	15.47	15.76	92768480	-0.7	0.9901	TRUE	15.54	15.43	15.71	9520252	2	0.9763	TRUE
sp|P02662|CASA1_BOVIN	FPEVF	638.3184+	1	638.318	FPEVF	16.56	16.48	16.96	1663748	1	0.9661	ALIGNED	16.74	16.44	16.93	2950873	3.7	0.8459	ALIGNED								16.48	16.34	16.66	81553536	1.1	0.9956	TRUE	16.43	16.3	16.65	129875296	2	0.9953	TRUE	16.39	16.27	16.61	250353696	1.6	0.995	TRUE
sp|P02662|CASA1_BOVIN	FPEVF	319.6629++	2	319.663	FPEVF																						16.45	16.34	16.66	7809224	0.7	0.9854	TRUE	16.43	16.3	16.65	10232569	1.1	0.986	TRUE	16.39	16.27	16.61	19796622	0.8	0.9911	TRUE
sp|P02662|CASA1_BOVIN	FPEVFGK	823.4349+	1	823.435	FPEVFGK																													13.14	13.03	13.31	5446185	1.9	0.9821	TRUE	13.12	13.01	13.36	219230	1.1	0.808	ALIGNED
sp|P02662|CASA1_BOVIN	FPEVFGK	412.2211++	2	412.221	FPEVFGK																						13.14	13.03	13.32	18438586	0.8	0.9943	TRUE	13.14	13.03	13.31	133504000	1.6	0.9964	TRUE	13.12	13.01	13.36	7411375	1.2	0.9905	ALIGNED
sp|P02662|CASA1_BOVIN	PEVFGK	338.6869++	2	338.687	PEVFGK																						7.61	7.54	7.76	288168	1.3	0.9768	ALIGNED	7.64	7.54	7.78	3122601	0.8	0.9258	TRUE
sp|P02662|CASA1_BOVIN	PEVFG	548.2715+	1	548.271	PEVFG	18.47	18.34	18.65	116321744	-0.7	0.9875	TRUE	18.43	18.3	18.64	270363392	-1.2	0.9886	TRUE	18.32	18.22	18.56	178505728	-0.8	0.987	TRUE	18.32	18.18	18.54	3535868	0.6	0.977	TRUE	9.85	9.76	9.98	22178150	0.6	0.986	TRUE	18.21	18.09	18.39	6203033	0.7	0.9874	TRUE
sp|P02662|CASA1_BOVIN	EVFGK	579.3137+	1	579.314	EVFGK																						5.95	5.86	6.06	702651	-1.4	0.9597	ALIGNED	5.99	5.9	6.14	14867660	-1.6	0.9825	TRUE	5.98	5.91	6.13	1032137	-0.4	0.9873	ALIGNED
sp|P02662|CASA1_BOVIN	EVFGK	290.1605++	2	290.16	EVFGK																						5.93	5.86	6.06	1602300	-1.2	0.9718	ALIGNED	5.99	5.9	6.14	24056480	-1.4	0.984	TRUE	5.98	5.91	6.13	3438594	-0.8	0.9749	ALIGNED
sp|P02662|CASA1_BOVIN	VFGK	450.2711+	1	450.271	VFGK	4.37	4.3	4.47	8066140	-0.1	0.8739	ALIGNED	4.36	4.31	4.43	864737	0	0.8245	ALIGNED	4.55	4.47	4.67	22414296	-0.8	0.9512	ALIGNED	4.52	4.44	4.64	11201887	-0.4	0.9848	TRUE	4.55	4.48	4.72	83108840	-0.9	0.9853	TRUE	4.57	4.5	4.74	2517288	-1.1	0.9679	TRUE
sp|P02662|CASA1_BOVIN	VFGK	225.6392++	2	225.639	VFGK	4.37	4.3	4.47	7446990	0.2	0.9397	ALIGNED	4.35	4.31	4.43	998612	-0.4	0.8617	ALIGNED								4.52	4.44	4.64	18246664	-1.2	0.983	TRUE	4.55	4.48	4.72	99829344	-2	0.9863	TRUE	4.57	4.5	4.74	5918796	-1.1	0.9795	TRUE
sp|P02662|CASA1_BOVIN	VFGKEK	354.2080++	2	354.208	VFGKEK																						3.31	3.24	3.44	5503499	-0.9	0.9887	TRUE	3.39	3.3	3.62	4825848	-1.5	0.9822	TRUE	3.39	3.32	3.57	1399411	-1.3	0.9932	TRUE
sp|P02662|CASA1_BOVIN	VFGKEK	236.4744+++	3	236.474	VFGKEK																						3.31	3.24	3.44	8064635	-1.1	0.9827	TRUE	3.39	3.3	3.62	8650561	-1.2	0.974	TRUE	3.39	3.32	3.57	2845864	-0.7	0.9679	TRUE
sp|P02662|CASA1_BOVIN	VFGKE	579.3137+	1	579.314	VFGKE	5.12	5.06	5.17	3270031	-2.4	0.9774	ALIGNED	5.09	5.05	5.15	2185388	-3.9	0.8564	ALIGNED								5.21	5.14	5.43	4726699	1.2	0.9784	TRUE	5.25	5.11	5.59	8393937	0.1	0.9753	ALIGNED	5.25	5.12	5.37	5265835	-2	0.9738	ALIGNED
sp|P02662|CASA1_BOVIN	VFGKEKVN	307.5115+++	3	307.512	VFGKEKVN
sp|P02662|CASA1_BOVIN	FGK	351.2027+	1	351.203	FGK	4.38	4.27	4.47	6902072	-1	0.9023	ALIGNED	4.36	4.25	4.52	1170033	-2.6	0.877	ALIGNED								4.52	4.44	4.64	16127266	-0.6	0.9829	ALIGNED	5.99	5.9	6.11	7836723	-1.4	0.9733	TRUE	4.57	4.5	4.73	5732154	-1.3	0.9885	TRUE
sp|P02662|CASA1_BOVIN	GKEKVNEL	458.7585++	2	458.759	GKEKVNEL																						5.46	5.39	5.62	3701173	0.3	0.9832	ALIGNED	5.56	5.49	5.68	4323847	-3.2	0.9289	ALIGNED	5.57	5.48	5.85	88508456	-1.4	0.9961	TRUE
sp|P02662|CASA1_BOVIN	KEK	404.2504+	1	404.25	KEK	0.43	0.39	0.51	15178459	0.9	0.974	ALIGNED	0.43	0.38	0.5	10264258	1.2	0.9779	TRUE	0.43	0.38	0.53	4904094	0.5	0.9637	ALIGNED
sp|P02662|CASA1_BOVIN	KEKVN	309.1845++	2	309.184	KEKVN	0.65																					0.62	0.62	0.73	4158087	-0.3	0.9693	ALIGNED	0.69	0.64	0.75	12391900	-1.7	0.9792	TRUE	0.71	0.66	0.77	5418800	-1.8	0.9756	TRUE
sp|P02662|CASA1_BOVIN	KEKV	503.3188+	1	503.319	KEKV	0.65	0.54	0.72	11107925	-1.9	0.9466	ALIGNED	0.65	0.61	0.68	6688157	-1.7	0.9713	ALIGNED								0.65	0.58	0.71	528626	-0.6	0.9649	ALIGNED	0.69	0.64	0.75	2494435	-1	0.9676	TRUE	0.83	0.78	0.89	943942	-2.3	0.9628	ALIGNED
sp|P02662|CASA1_BOVIN	KEKVNELS	473.7638++	2	473.764	KEKVNELS																						4.41	4.32	4.53	8974617	-0.1	0.9833	TRUE	4.48	4.4	4.67	45511504	-0.9	0.9937	TRUE	4.49	4.41	4.66	2399216	0.1	0.9937	ALIGNED
sp|P02662|CASA1_BOVIN	EKVNE	618.3093+	1	618.309	EKVNE	1.27	1.22	1.34	290137952	-1	0.9812	TRUE	1.27	1.22	1.34	403450464	-1.4	0.9838	TRUE	1.26	1.21	1.33	312792864	-1.1	0.9904	TRUE	1.56	1.34	1.68	3709477	0.2	0.9866	ALIGNED	1.63	1.51	1.73	23611798	-1	0.9895	ALIGNED	1.63	1.58	1.74	765888	-1	0.9901	ALIGNED
sp|P02662|CASA1_BOVIN	EKVNELSK	1026.4867+	1	1026.49	EKVNELS[+80]K	4.85	4.79	4.95	18242528	0.2	0.9784	TRUE	4.84	4.78	4.95	32422124	-0.4	0.9877	TRUE	4.88	4.81	4.96	9644824	-0.6	0.9825	TRUE
sp|P02662|CASA1_BOVIN	EKVNELSK	513.7470++	2	513.747	EKVNELS[+80]K	4.86	4.79	4.95	52480776	0	0.9871	TRUE	4.85	4.78	4.95	85818192	-0.3	0.9978	TRUE	4.88	4.81	4.96	25609318	0.2	0.9744	TRUE
sp|P02662|CASA1_BOVIN	EKVNELS	449.6995++	2	449.7	EKVNELS[+80]								5.63	5.59	5.74	4146078	1.6	0.9058	ALIGNED								5.63	5.56	5.74	919226	0.5	0.9909	ALIGNED	5.65	5.58	5.75	9867535	-0.7	0.9913	TRUE	5.65	5.61	5.73	229645	3.4	0.9061	ALIGNED
sp|P02662|CASA1_BOVIN	KVN	360.2241+	1	360.224	KVN	0.38	0.33	0.43	2668	-0.8	0.9039	ALIGNED															0.59	0.54	0.69	6877519	-0.8	0.9788	TRUE	0.76	0.66	0.8	1296680	-2.5	0.9557	ALIGNED	0.84	0.68	0.89	835690	-2.8	0.8922	ALIGNED
sp|P02662|CASA1_BOVIN	KVNELSK	449.2257++	2	449.226	KVNELS[+80]K	3.89	3.89	4.05	148410080	-1.6	0.8897	ALIGNED
sp|P02662|CASA1_BOVIN	KVNELS	689.3828+	1	689.383	KVNELS	4.45	4.37	4.57	43530912	0	0.9814	ALIGNED	4.4	4.35	4.56	76335936	-0.7	0.9807	TRUE	4.44	4.37	4.58	35650060	-0.3	0.9806	ALIGNED	4.57	4.49	4.68	2078209	-0.5	0.9766	ALIGNED	4.66	4.56	4.78	5894656	-1.5	0.9824	ALIGNED	4.66	4.59	4.75	293070	-1.4	0.9536	ALIGNED
sp|P02662|CASA1_BOVIN	VNE	361.1718+	1	361.172	VNE	1.12	1.08	1.27	535806304	-1.4	0.9918	ALIGNED	1.12	1.07	1.27	646645376	-1.8	0.991	TRUE	1.12	1.08	1.27	640916160	-1.1	0.9898	TRUE	1.19	1.15	1.33	6319063	-0.3	0.9926	TRUE								1.28	1.23	1.41	1614596	-2.4	0.9734	ALIGNED
sp|P02662|CASA1_BOVIN	VNE	362.1558+	1	362.156	VN[+1]E	1.34	1	1.53	94756632	-2.5	0.8662	ALIGNED	1.34	0.99	1.53	99637472	-3.1	0.8597	ALIGNED	1.34	1.23	1.52	64081612	-1.3	0.9844	ALIGNED	1.39	1.34	1.52	139919	1.3	0.9139	ALIGNED	1.39	1.33	1.6	699508	0.8	0.9683	ALIGNED	1.45	1.38	1.59	7804769	1.6	0.9896	TRUE
sp|P02662|CASA1_BOVIN	VNELSK	769.3492+	1	769.349	VNELS[+80]K	4.49	4.44	4.61	148238880	-0.8	0.9888	TRUE	4.5	4.42	4.61	207221872	-1.4	0.9895	TRUE	4.52	4.45	4.64	79452712	-0.9	0.9928	TRUE	4.78	4.7	4.87	229922	-1.1	0.9627	ALIGNED
sp|P02662|CASA1_BOVIN	VNELSK	385.1782++	2	385.178	VNELS[+80]K	4.51	4.44	4.61	232672560	-0.7	0.9872	TRUE	4.5	4.42	4.61	310335168	-1.3	0.9921	TRUE	4.52	4.45	4.64	109459488	-0.8	0.9884	TRUE	4.78	4.7	4.87	817804	-0.6	0.9725	ALIGNED	4.62	4.56	4.63	29773	0	0.8441	ALIGNED
sp|P02662|CASA1_BOVIN	VNELS	561.2879+	1	561.288	VNELS	5.32	5.25	5.44	1299810432	-0.7	0.9885	TRUE	5.31	5.24	5.44	2676531200	-0.5	0.9918	TRUE	5.34	5.25	5.45	1388704000	-0.4	0.9913	TRUE	5.35	5.28	5.46	14745508	0.5	0.9833	ALIGNED	5.4	5.31	5.5	72999072	-0.7	0.9876	TRUE	5.41	5.29	5.53	2591808	-0.9	0.9754	ALIGNED
sp|P02662|CASA1_BOVIN	NELSKDIGSEST	720.7626++	2	720.763	N[+1]ELSKDIGS[+80]EST[+80]																						6.68	6.58	6.81	4342791	0.5	0.9897	TRUE	6.65	6.54	6.77	4806658	-1.4	0.99	ALIGNED
sp|P02662|CASA1_BOVIN	ELSKDIGSESTE	727.7704++	2	727.77	ELS[+80]KDIGS[+80]ESTE																						7.35	7.23	7.48	16119262	-0.8	0.9958	TRUE	7.33	7.26	7.44	13924120	-0.1	0.9953	ALIGNED
sp|P02662|CASA1_BOVIN	ELSKDIGSESTE	767.7536++	2	767.754	ELS[+80]KDIGS[+80]ES[+80]TE																						7.35	7.26	7.58	12540260	-0.7	0.9926	ALIGNED	7.28	7.21	7.43	14820341	-0.2	0.9921	TRUE
sp|P02662|CASA1_BOVIN	LSKDIGSESTE	663.2491++	2	663.249	LSKDIGS[+80]ES[+80]TE																						6.61	6.51	6.73	20542844	-1	0.9938	ALIGNED	6.58	6.49	6.71	13516699	-0.4	0.9967	TRUE	6.59	6.53	6.7	161561	-0.1	0.9274	ALIGNED
sp|P02662|CASA1_BOVIN	LSKDIGSE	464.7048++	2	464.705	LSKDIGS[+80]E																						6.18	6.11	6.36	3678393	-0.5	0.9772	TRUE	6.17	6.08	6.28	1835006	0.4	0.988	ALIGNED	6.17	6.14	6.23	16762	-0.5	0.8076	ALIGNED
sp|P02662|CASA1_BOVIN	SKDIGSESTE	606.7071++	2	606.707	SKDIGS[+80]ES[+80]TE								4.45	4.4	4.49	1410507	-0.6	0.9453	ALIGNED								4.44	4.35	4.6	21347266	-0.9	0.9983	TRUE	4.45	4.36	4.62	25875670	-1.7	0.9944	TRUE	4.45	4.37	4.55	678233	-0.5	0.9885	ALIGNED
sp|P02662|CASA1_BOVIN	SKDIGSESTEDQAM	829.2886++	2	829.289	SKDIGS[+80]ES[+80]TEDQAM																						8.05	7.95	8.22	5119071	0.1	0.9992	ALIGNED	8.01	7.87	8.11	7066033	0.6	0.9665	TRUE	8	7.92	8.08	548145	-0.1	0.9827	ALIGNED
sp|P02662|CASA1_BOVIN	SKDIGSESTEDQ	728.2498++	2	728.25	SKDIGS[+80]ES[+80]TEDQ	4.69	4.62	4.79	27147472	-1.5	0.987	ALIGNED	4.69	4.62	4.78	27647276	-1.5	0.9928	TRUE	4.67	4.6	4.79	31853888	-1.8	0.9941	ALIGNED	4.67	4.58	4.78	10088753	-1.2	0.9942	ALIGNED	4.64	4.56	4.79	13612968	-2.2	0.9873	TRUE
sp|P02662|CASA1_BOVIN	SKDIGSESTE	646.6902++	2	646.69	S[+80]KDIGSES[+80]T[+80]E																						3.97	3.9	4.26	3070559	-0.1	0.9902	ALIGNED	3.96	3.9	4.17	5609720	-0.9	0.9867	TRUE
sp|P02662|CASA1_BOVIN	SKDIGSESTEDQ	768.2330++	2	768.233	S[+80]KDIGS[+80]ES[+80]TEDQ																						4.29	4.22	4.51	2751693	-1.2	0.9898	TRUE	4.26	4.18	4.4	5142062	-1.5	0.9795	TRUE
sp|P02662|CASA1_BOVIN	KDIGSESTEDQAM	785.7726++	2	785.773	KDIGS[+80]ES[+80]TEDQAM																						8.18	8.05	8.31	7738888	0.3	0.9902	TRUE	8.14	8.07	8.26	19497366	-1.4	0.9936	TRUE	8.13	8.08	8.2	275744	-0.8	0.9626	ALIGNED
sp|P02662|CASA1_BOVIN	KDIGSESTEDQ	684.7338++	2	684.734	KDIGS[+80]ES[+80]TEDQ	4.71	4.64	4.8	23700396	-0.4	0.9765	TRUE	4.69	4.64	4.78	21191016	-0.4	0.9823	ALIGNED								4.68	4.61	4.81	21550176	-1.1	0.9966	TRUE	4.68	4.6	4.79	49169608	-2.2	0.9947	TRUE
sp|P02662|CASA1_BOVIN	KDIGSESTEDQAME	850.2939++	2	850.294	KDIGS[+80]ES[+80]TEDQAME																						8.12	8.04	8.26	9960609	-0.5	0.9947	TRUE	8.07	7.99	8.19	22003468	-0.3	0.9966	TRUE	8.05	7.99	8.13	203601	0.3	0.9543	ALIGNED
sp|P02662|CASA1_BOVIN	KDIGSESTE	563.1911++	2	563.191	KDIGS[+80]ES[+80]TE								4.48	4.41	4.56	7744637	4	0.9295	ALIGNED								4.46	4.39	4.59	41488820	-0.7	0.9957	TRUE	4.46	4.4	4.59	87927856	-1.2	0.9952	TRUE
sp|P02662|CASA1_BOVIN	KDIGSESTEDQ	685.2258++	2	685.226	KDIGS[+80]ES[+80]TEDQ[+1]																						5.23	4.94	5.33	1084535	1.4	0.9131	ALIGNED	5.21	5.14	5.31	4944991	-1	0.9922	TRUE
sp|P02662|CASA1_BOVIN	KDIGSESTEDQAMEDIK	685.9337+++	3	685.934	KDIGS[+80]ES[+80]TEDQAMEDIK																						11.45	11.38	11.58	729794	-0.1	0.9694	ALIGNED	11.4	11.32	11.57	5445669	-1	0.9729	TRUE
sp|P02662|CASA1_BOVIN	KDIGSESTEDQAMED	907.8074++	2	907.807	KDIGS[+80]ES[+80]TEDQAMED																						8.24	8.15	8.37	2771670	1.4	0.9855	ALIGNED	8.19	8.11	8.27	12522884	-0.5	0.9971	TRUE	8.19	8.13	8.25	158621	0.5	0.9477	ALIGNED
sp|P02662|CASA1_BOVIN	KDIGSESTEDQA	720.2524++	2	720.252	KDIGS[+80]ES[+80]TEDQA																						5.78	5.71	5.92	3389264	1.1	0.9917	TRUE	5.76	5.68	5.86	9574794	0	0.9971	TRUE
sp|P02662|CASA1_BOVIN	KDIGSESTED	620.7045++	2	620.705	KDIGS[+80]ES[+80]TED																						4.67	4.6	4.74	8263292	-0.6	0.9926	TRUE	4.66	4.6	4.71	25855512	-1.1	0.9986	ALIGNED
sp|P02662|CASA1_BOVIN	KDI	375.2238+	1	375.224	KDI	7.14	7.07	7.25	1411826	0.1	0.8395	ALIGNED	7.15	7.15	7.33	1133291	-0.9	0.8751	ALIGNED	7.22	7.1	7.31	1874871	-0.8	0.8186	ALIGNED	7.12	7.07	7.27	843967	0.1	0.8631	ALIGNED	7.2	7.14	7.37	2140226	-0.6	0.9638	TRUE	7.21	7.15	7.3	271847	0.3	0.8527	ALIGNED
sp|P02662|CASA1_BOVIN	DIGSESTED	556.6571++	2	556.657	DIGS[+80]ES[+80]TED																						4.72	4.63	4.86	10232767	-1	0.99	TRUE	4.68	4.61	4.81	16766789	-2	0.9845	ALIGNED
sp|P02662|CASA1_BOVIN	DIGSESTEDQAMEDIK	964.3494++	2	964.349	DIGS[+80]ES[+80]TEDQAMEDIK	12.27	12.18	12.38	60991388	-0.2	0.9964	TRUE	12.26	12.17	12.38	72474288	-0.8	0.9857	TRUE	12.19	12.1	12.29	27329720	0	0.9877	TRUE								12.13	12.05	12.2	830710	1.1	0.9908	ALIGNED
sp|P02662|CASA1_BOVIN	DIGSESTEDQAMEDIK	643.2354+++	3	643.235	DIGS[+80]ES[+80]TEDQAMEDIK	12.27	12.18	12.38	45716384	-0.4	0.9906	TRUE	12.26	12.17	12.38	52280128	-1.1	0.9918	TRUE	12.19	12.1	12.29	22263070	0	0.9878	TRUE	12.19	12.08	12.34	450289	1.8	0.9955	ALIGNED	12.13	12.05	12.2	1033572	0.9	0.9849	ALIGNED
sp|P02662|CASA1_BOVIN	DIGSESTEDQ	1240.3654+	1	1240.37	DIGS[+80]ES[+80]TEDQ	4.89	4.79	5.01	81989568	0.1	0.9936	TRUE	4.89	4.81	5.02	77273968	-0.2	0.9942	TRUE	4.86	4.76	4.99	71349352	0.4	0.9931	TRUE	4.75	4.67	4.94	8875735	0.6	0.9919	TRUE	4.71	4.66	4.85	14769662	-1.1	0.9945	TRUE
sp|P02662|CASA1_BOVIN	DIGSESTEDQ	620.6863++	2	620.686	DIGS[+80]ES[+80]TEDQ	4.9	4.79	5.01	72714520	-0.9	0.9971	TRUE	4.92	4.81	5.02	74137872	-1.2	0.9899	TRUE	4.86	4.76	4.99	35974736	-0.6	0.9963	TRUE	4.76	4.67	4.94	43848448	-0.7	0.998	TRUE	4.72	4.66	4.85	63269952	-2.2	0.994	TRUE	4.72	4.66	4.81	217329	-0.8	0.9217	ALIGNED
sp|P02662|CASA1_BOVIN	DIGSESTE	997.2799+	1	997.28	DIGS[+80]ES[+80]TE																						4.48	4.37	4.75	51635184	-0.4	0.9952	TRUE	4.45	4.37	4.61	84043336	-1.2	0.9938	TRUE	4.44	4.4	4.58	249853	-0.9	0.9797	ALIGNED
sp|P02662|CASA1_BOVIN	DIGSESTE	499.1436++	2	499.144	DIGS[+80]ES[+80]TE																						4.48	4.37	4.75	43257216	-0.6	0.995	TRUE	4.45	4.37	4.61	49765624	-1.1	0.9939	TRUE
sp|P02662|CASA1_BOVIN	DIGSESTEDQAM	721.7251++	2	721.725	DIGS[+80]ES[+80]TEDQAM																						8.5	8.39	8.7	11830553	0.5	0.991	TRUE	8.42	8.33	8.54	19261050	0.2	0.9988	TRUE	8.41	8.34	8.55	597567	-0.7	0.9797	ALIGNED
sp|P02662|CASA1_BOVIN	DIGSESTE	917.3136+	1	917.314	DIGS[+80]ESTE																						5.31	5.2	5.44	5268046	0.3	0.9952	TRUE	5.31	5.23	5.42	12249994	-0.8	0.994	TRUE
sp|P02662|CASA1_BOVIN	DIGSE	600.1913+	1	600.191	DIGS[+80]E	3.89	3.82	3.99	19668608	0.4	0.9794	TRUE	3.9	3.82	4	8232885	0	0.9947	ALIGNED	3.91	3.84	3.96	1060065	0.7	0.8455	ALIGNED
sp|P02662|CASA1_BOVIN	DIGSESTEDQA	656.2049++	2	656.205	DIGS[+80]ES[+80]TEDQA																						5.94	5.85	6.12	7675411	-1.2	0.9916	ALIGNED	5.88	5.81	6	10785006	0.7	0.9934	TRUE
sp|P02662|CASA1_BOVIN	DIGSESTEDQAME	786.2464++	2	786.246	DIGS[+80]ES[+80]TEDQAME																						8.45	8.34	8.63	16693807	0.1	0.9946	TRUE	8.35	8.28	8.51	20746474	-0.2	0.9945	TRUE	8.36	8.25	8.43	486208	0.5	0.9955	ALIGNED
sp|P02662|CASA1_BOVIN	IGSESTE	882.2530+	1	882.253	IGS[+80]ES[+80]TE																						3.72	3.63	3.87	21099226	-0.7	0.9924	TRUE	3.72	3.66	3.83	26649834	-1.4	0.9919	TRUE	3.72	3.66	3.81	76097	1	0.9226	ALIGNED
sp|P02662|CASA1_BOVIN	IGSESTEDQAME	728.7330++	2	728.733	IGS[+80]ES[+80]TEDQAME																						7.87	7.79	8.02	4756711	0.7	0.9904	TRUE	7.78	7.71	7.9	5230562	-0.2	0.9896	ALIGNED
sp|P02662|CASA1_BOVIN	IGSE	405.1980+	1	405.198	IGSE	2.41	2.27	2.51	6802343	-0.1	0.8771	ALIGNED	2.4	2.28	2.5	7441150	-0.7	0.8835	ALIGNED	2.43	2.27	2.5	4141813	-0.6	0.943	ALIGNED	2.44	2.35	2.54	2925148	-0.9	0.9792	TRUE	2.46	2.4	2.57	20015116	-1.1	0.9881	ALIGNED	2.49	2.4	2.58	386281	-0.4	0.9505	ALIGNED
sp|P02662|CASA1_BOVIN	IGSESTE	802.2866+	1	802.287	IGS[+80]ESTE																						4.59	4.51	4.68	3514695	-0.6	0.9831	ALIGNED	4.59	4.51	4.66	6445916	-0.8	0.9891	TRUE
sp|P02662|CASA1_BOVIN	IGSESTED	499.1436++	2	499.144	IGS[+80]ES[+80]TED																						4.01	3.92	4.15	4008649	-0.3	0.9922	TRUE	3.99	3.93	4.19	4107542	-1	0.9886	ALIGNED	4.04	3.94	4.1	103503	-3	0.9224	ALIGNED
sp|P02662|CASA1_BOVIN	IGSESTEDQ	563.1729++	2	563.173	IGS[+80]ES[+80]TEDQ																						4.12	4.03	4.26	14553885	1	0.9951	TRUE	4.08	4.03	4.23	20720946	-0.8	0.9953	TRUE
sp|P02662|CASA1_BOVIN	DQAME	594.2076+	1	594.208	DQ[+1]AME																						3.81	3.69	3.96	2916443	0.6	0.9434	TRUE	3.87	3.73	4	9281456	0	0.9475	ALIGNED	3.85	3.81	3.96	135383	1.5	0.8178	ALIGNED
sp|P02662|CASA1_BOVIN	DQAMEDIK	475.2184++	2	475.218	DQAMEDIK	7.29	7.18	7.43	27053376	0.4	0.981	TRUE	7.3	7.18	7.38	25292150	-0.3	0.9814	TRUE	7.3	7.16	7.38	6842336	1.5	0.92	ALIGNED	7.35	7.28	7.46	3646188	-0.6	0.9697	ALIGNED	7.36	7.29	7.49	8373587	-0.7	0.9763	TRUE
sp|P02662|CASA1_BOVIN	DQAME	593.2236+	1	593.224	DQAME	3.27	3.2	3.37	36999244	-0.3	0.9187	ALIGNED	3.27	3.2	3.37	20510656	-0.5	0.8962	ALIGNED								3.32	3.23	3.41	55782912	-0.6	0.9552	ALIGNED	3.36	3.29	3.47	82424040	-1	0.9598	ALIGNED	3.36	3.29	3.49	1242922	0	0.9479	TRUE
sp|P02662|CASA1_BOVIN	QAME	479.1806+	1	479.181	Q[+1]AME
sp|P02662|CASA1_BOVIN	AMEDIKQ	418.1969++	2	418.197	AMEDIKQ[+1]	6.92	6.86	7.02	60256620	-0.6	0.9673	TRUE	6.92	6.86	7.02	24205208	-1	0.9575	ALIGNED	6.92	6.83	6.98	2310496	0.6	0.8841	ALIGNED	6.98	6.89	7.09	990011	0.1	0.9446	ALIGNED	6.98	6.91	7.27	1676954	1.2	0.949	ALIGNED	7	6.95	7.09	80180	1	0.8516	ALIGNED
sp|P02662|CASA1_BOVIN	AMEDIK	706.3440+	1	706.344	AMEDIK	5.91	5.82	6.03	1304553856	-0.7	0.9573	TRUE	5.87	5.8	6.03	1773230336	-1	0.9603	TRUE	5.9	5.83	6.04	1290958848	-0.8	0.9658	TRUE	5.96	5.89	6.07	771260	-1.9	0.8915	TRUE	5.99	5.93	6.13	2849719	-1.6	0.943	TRUE
sp|P02662|CASA1_BOVIN	AMEDIK	353.6756++	2	353.676	AMEDIK	5.91	5.82	6.03	3649487104	-0.4	0.9816	TRUE	5.89	5.8	6.03	4874392576	-0.9	0.9879	TRUE	5.9	5.83	6.04	3737855232	-0.6	0.987	TRUE	5.96	5.89	6.07	3605274	-1.8	0.9573	TRUE	6	5.93	6.13	9147232	-1.7	0.9415	TRUE	6	5.89	6.13	401835	-0.8	0.9124	ALIGNED
sp|P02662|CASA1_BOVIN	AMED	465.1650+	1	465.165	AMED	2.6	2.53	2.88	25696504	0.5	0.9431	TRUE	2.54	2.51	2.75	24814694	-0.1	0.9455	ALIGNED	2.57	2.54	2.8	19241944	0.3	0.9407	TRUE								2.68	2.61	2.79	1167393	0.6	0.8972	ALIGNED
sp|P02662|CASA1_BOVIN	AMEDIKQ	834.4026+	1	834.403	AMEDIKQ	6.01	5.94	6.11	68661968	0.8	0.9862	TRUE	5.99	5.93	6.1	83564312	0.2	0.9825	TRUE	6.01	5.94	6.11	99209016	-0.1	0.9812	TRUE
sp|P02662|CASA1_BOVIN	AMEDIKQ	417.7049++	2	417.705	AMEDIKQ	6.01	5.94	6.11	432417568	-0.2	0.9809	TRUE	5.99	5.93	6.1	541749824	-0.7	0.9843	TRUE	6.01	5.94	6.11	661988864	-0.7	0.9854	TRUE	6.03	5.96	6.19	2118476	-0.5	0.9534	ALIGNED	6.06	6	6.26	2636649	-1.2	0.9866	ALIGNED
sp|P02662|CASA1_BOVIN	AMEDIKQ	425.7024++	2	425.702	AM[+16]EDIKQ	3.78	3.71	3.9	13072040	-0.5	0.964	TRUE	3.77	3.7	3.89	14921123	-1	0.9615	TRUE	3.8	3.71	3.92	23439564	-0.7	0.9628	TRUE	3.85	3.78	3.96	241241	0.7	0.9416	ALIGNED	3.9	3.84	4	391405	-0.4	0.9303	ALIGNED
sp|P02662|CASA1_BOVIN	AMEDIK	722.3389+	1	722.339	AM[+16]EDIK	3.3	3.25	3.49	39382784	-1	0.9663	TRUE	3.29	3.24	3.49	41887128	-1.2	0.9639	TRUE	3.35	3.28	3.49	37850392	-0.5	0.9742	TRUE
sp|P02662|CASA1_BOVIN	AMEDIK	361.6731++	2	361.673	AM[+16]EDIK	3.31	3.25	3.49	108614824	-1	0.9506	TRUE	3.31	3.24	3.49	127264264	-1.4	0.942	TRUE	3.35	3.28	3.49	151029024	-0.7	0.9456	TRUE								3.48	3.36	3.71	1035641	-1.6	0.8093	ALIGNED
sp|P02662|CASA1_BOVIN	MED	394.1279+	1	394.128	MED	1.98	1.93	2.07	42722036	-1.9	0.9736	TRUE	1.97	1.9	2.04	44871864	-2.2	0.9699	TRUE	1.98	1.93	2.07	72939720	-1.6	0.9747	ALIGNED	2.04	1.96	2.2	90587	-0.2	0.8916	ALIGNED	2.12	2.05	2.29	911444	-0.1	0.9779	ALIGNED	2.13	2.04	2.29	1440147	-2.3	0.844	TRUE
sp|P02662|CASA1_BOVIN	MEDIKQ	382.1864++	2	382.186	MEDIKQ								5.19	5.13	5.28	15251934	-2	0.9766	ALIGNED	5.2	5.13	5.3	16399754	-1	0.9307	TRUE								5.27	5.19	5.38	1776668	-1.5	0.9348	ALIGNED
sp|P02662|CASA1_BOVIN	MEDIK	635.3069+	1	635.307	MEDIK	5.9	5.83	6.04	710288576	-0.7	0.9592	TRUE	5.88	5.81	6.04	911496064	-1	0.9613	TRUE	5.9	5.83	6.05	731441280	-0.7	0.9618	TRUE	5	4.93	5.11	318320	1	0.9392	TRUE	5.06	4.99	5.19	2006017	0.1	0.95	TRUE
sp|P02662|CASA1_BOVIN	MEDIK	318.1571++	2	318.157	MEDIK	5.9	5.83	6.04	14921273	-0.5	0.9137	TRUE	5.88	5.81	6.04	18831448	-1.5	0.927	TRUE	5.9	5.83	6.05	15509464	-0.9	0.9501	TRUE	5	4.93	5.11	2019249	0.9	0.9425	TRUE	5.06	4.99	5.19	4972707	0.1	0.9386	TRUE	5.07	5.01	5.19	169154	-1.3	0.958	ALIGNED
sp|P02662|CASA1_BOVIN	MEDI	507.2119+	1	507.212	MEDI	8.44	8.28	8.56	21644722	-1.2	0.9063	TRUE	8.44	8.32	8.58	46728884	-1.1	0.921	TRUE	8.45	8.36	8.55	87967568	-0.3	0.9547	TRUE	8.49	7.85	9.05	1307851	-5	0.9193	ALIGNED	8.51	8.38	8.6	900331	-1	0.8786	ALIGNED
sp|P02662|CASA1_BOVIN	EDIKQME	446.7077++	2	446.708	EDIKQME																						6.99	6.93	7.11	11345159	0.1	0.9772	TRUE	7	6.82	7.13	16857482	-0.2	0.965	ALIGNED	7.01	6.82	7.11	1394781	-0.1	0.9215	ALIGNED
sp|P02662|CASA1_BOVIN	EDI	376.1714+	1	376.171	EDI	5.2	5.1	5.31	45344452	-0.2	0.9487	TRUE	5.17	5.09	5.3	53119604	-1.2	0.947	ALIGNED	5.23	5.13	5.34	82442896	-0.9	0.9737	TRUE	5.39	5.33	5.53	1625600	0.2	0.9743	TRUE	5.33	5.25	5.5	27942356	-0.9	0.982	TRUE	5.34	5.26	5.47	13021447	-1.7	0.9795	ALIGNED
sp|P02662|CASA1_BOVIN	EDIK	504.2664+	1	504.266	EDIK	5.91	5.83	6.04	1121184512	-0.6	0.9877	TRUE	5.88	5.81	6.02	1436023168	-0.9	0.9885	TRUE	5.91	5.84	6.05	1163470592	-0.7	0.9887	TRUE	1.91	1.8	2.03	9201755	0.7	0.9871	TRUE	1.99	1.89	2.11	22657598	-0.6	0.9869	TRUE	1.99	1.92	2.12	186629	0.7	0.9354	ALIGNED
sp|P02662|CASA1_BOVIN	EDIKQ	632.3250+	1	632.325	EDIKQ	6.01	5.94	6.09	41009284	0.2	0.9795	ALIGNED	5.99	5.92	6.1	51311932	-0.4	0.9867	TRUE	6	5.93	6.11	62211576	-0.2	0.9831	ALIGNED								6.05	6.02	6.14	171153	-1.1	0.8371	ALIGNED
sp|P02662|CASA1_BOVIN	DIK	375.2238+	1	375.224	DIK	1.1	1.05	1.18	522362592	-1.2	0.9775	TRUE	1.09	1.05	1.19	621419520	-1.8	0.9773	TRUE	1.09	1.05	1.18	529746720	-0.9	0.9796	TRUE	1.18	1.12	1.25	25915172	-0.7	0.9773	TRUE	1.15	1.11	1.21	47660768	-0.9	0.9813	TRUE	1.22	1	1.27	2353651	-1.2	0.9759	ALIGNED
sp|P02662|CASA1_BOVIN	IKQM	260.1516++	2	260.152	IKQM	3.56	3.48	3.74	103010728	0.1	0.9509	ALIGNED	3.55	3.46	3.69	99427952	-0.3	0.9535	TRUE	3.57	3.5	3.74	28891558	-0.2	0.9566	TRUE								3.75	3.66	3.9	3227991	-0.2	0.9344	ALIGNED	3.76	3.68	3.92	512076	0.8	0.9606	ALIGNED
sp|P02662|CASA1_BOVIN	KQMEAE	735.3342+	1	735.334	KQMEAE	2.41	2.36	2.5	11112126	-0.4	0.9734	TRUE	2.4	2.33	2.5	15648303	-0.9	0.9682	ALIGNED	2.4	2.36	2.46	9760751	-1	0.9641	ALIGNED	2.57	2.43	2.7	168043	-0.2	0.8006	ALIGNED
sp|P02662|CASA1_BOVIN	QMEAE	608.2232+	1	608.223	Q[+1]MEAE	3.78	3.71	3.87	17857138	0	0.9537	TRUE	3.76	3.7	3.84	7958297	-0.4	0.9509	ALIGNED															3.87	3.81	3.98	3059161	-0.5	0.954	ALIGNED
sp|P02662|CASA1_BOVIN	SISSSEEIVPN	701.2348++	2	701.235	SIS[+80]S[+80]S[+80]EEIVPN																						10.22	9.74	10.97	23048776	0.8	0.9939	ALIGNED	9.87	9.4	10.17	31424624	-0.3	0.9931	TRUE
sp|P02662|CASA1_BOVIN	ISS	306.1660+	1	306.166	ISS	1.88	1.8	1.97	381442016	-1.4	0.9935	ALIGNED	1.86	1.79	1.99	435760640	-1.4	0.9865	ALIGNED	1.89	1.81	2.02	504756256	-1.1	0.989	ALIGNED	1.91	1.82	2.02	576195	-0.1	0.9619	ALIGNED	1.99	1.88	2.09	2367170	-1.1	0.9954	TRUE	2	1.93	2.11	2032964	-0.1	0.9821	ALIGNED
sp|P02662|CASA1_BOVIN	ISS	386.1323+	1	386.132	ISS[+80]																													1.86	1.75	2.09	1405709	-1.1	0.8577	TRUE
sp|P02662|CASA1_BOVIN	ISSS	393.1980+	1	393.198	ISSS								2.26	2.16	2.35	8667425	-0.9	0.9396	ALIGNED	2.27	2.22	2.36	17973568	-0.9	0.9525	TRUE								2.38	2.32	2.65	297296	-0.4	0.8707	ALIGNED	2.6	2.51	2.71	34000	-3	0.8105	ALIGNED
sp|P02662|CASA1_BOVIN	EEIVPN	700.3512+	1	700.351	EEIVPN	8.22	8.16	8.3	8217150	-0.8	0.9717	TRUE	8.2	8.16	8.32	7386654	-0.9	0.9677	ALIGNED	8.24	8.17	8.31	6401156	-0.5	0.827	ALIGNED	8.28	8.12	8.37	424514	1.1	0.96	ALIGNED	8.29	8.22	8.4	980746	0.7	0.9546	ALIGNED	8.3	8.17	8.39	300868	-0.7	0.8372	ALIGNED
sp|P02662|CASA1_BOVIN	EIVPN	571.3086+	1	571.309	EIVPN	7.32	7.25	7.44	3858141696	-0.2	0.993	TRUE	7.31	7.24	7.44	4062475520	-0.8	0.9929	TRUE	7.31	7.24	7.45	7758634496	-0.4	0.9947	TRUE	7.35	7.26	7.46	165923280	-0.5	0.9916	TRUE	7.38	7.3	7.5	280393216	-0.9	0.9921	TRUE	7.39	7.31	7.49	877773120	-1.8	0.9935	ALIGNED
sp|P02662|CASA1_BOVIN	EIVP	457.2657+	1	457.266	EIVP	9.29	9.16	9.37	45260424	-0.3	0.9696	ALIGNED	9.26	9.17	9.34	26061374	-0.5	0.9475	ALIGNED	9.25	9.14	9.37	6936112	-0.1	0.9807	ALIGNED	9.31	9.2	9.51	11967158	0.7	0.9833	TRUE	9.33	9.24	9.55	33190438	0.8	0.987	ALIGNED	9.34	9.23	9.57	9101401	-0.2	0.978	ALIGNED
sp|P02662|CASA1_BOVIN	EIVPN	572.2926+	1	572.293	EIVPN[+1]	8.23	8.16	8.32	10484828	-1.4	0.9393	ALIGNED	8.22	8.16	8.3	8369809	-1.5	0.8584	ALIGNED	8.25	8.17	8.34	14582454	-0.9	0.9166	ALIGNED	8.27	8.18	8.42	3142385	1	0.9885	ALIGNED	8.29	8.22	8.43	10748962	0.6	0.9894	TRUE	8.3	8.2	8.42	38051772	0	0.9913	ALIGNED
sp|P02662|CASA1_BOVIN	IVPN	442.2660+	1	442.266	IVPN	4.63	4.53	4.8	433444640	-0.6	0.9775	TRUE	4.62	4.52	4.79	412305024	-1.1	0.9837	TRUE	4.66	4.54	4.81	1377139840	-0.7	0.9843	TRUE	4.72	4.59	4.93	32092120	-0.7	0.9835	TRUE	4.75	4.65	4.91	79851736	-1.1	0.9829	TRUE	4.77	4.65	4.94	197903664	-1.9	0.9895	TRUE
sp|P02662|CASA1_BOVIN	SVEQK	591.2984+	1	591.298	SVEQ[+1]K								1	0.96	1.04	996182	-1.2	0.8596	ALIGNED								1.02	0.96	1.09	894733	-0.3	0.9683	ALIGNED	1.05	0.99	1.12	4730002	-1.5	0.9845	TRUE
sp|P02662|CASA1_BOVIN	SVEQKHIQ	524.7448++	2	524.745	S[+80]VEQKHIQ																						3.92	3.84	4.01	26328838	-0.3	0.9974	TRUE	3.95	3.84	4.09	12109384	-0.6	0.9933	TRUE	3.96	3.89	4.03	369135	1.3	0.9846	ALIGNED
sp|P02662|CASA1_BOVIN	SVEQKHIQ	350.1656+++	3	350.166	S[+80]VEQKHIQ																						3.92	3.84	4.01	15382012	-0.9	0.9952	TRUE	3.95	3.84	4.09	6639618	-1.4	0.9886	TRUE	3.96	3.89	4.03	246480	-0.5	0.9198	ALIGNED
sp|P02662|CASA1_BOVIN	SVEQ	542.1858+	1	542.186	S[+80]VEQ	1.39	1.32	1.5	216649984	-0.7	0.9868	ALIGNED	1.38	1.32	1.5	363140704	-0.9	0.9908	TRUE	1.38	1.32	1.51	773847360	-0.6	0.9929	TRUE	1.37	1.29	1.49	54966696	0.4	0.991	TRUE	1.41	1.35	1.5	134718800	-0.1	0.9933	ALIGNED	1.77	1.68	1.89	149663	1.3	0.9518	ALIGNED
sp|P02662|CASA1_BOVIN	SVEQK	671.2648+	1	671.265	S[+80]VEQ[+1]K	1.22	1.13	1.27	38693704	-0.9	0.9991	TRUE	1.22	1.12	1.33	16492085	-0.6	0.9757	ALIGNED								1.24	1.19	1.44	18223846	1.6	0.9789	TRUE	1.23	1.13	1.37	24631878	0.6	0.9825	TRUE
sp|P02662|CASA1_BOVIN	SVEQK	336.1360++	2	336.136	S[+80]VEQ[+1]K	1.22	1.13	1.27	4247928	-1.4	0.9343	TRUE	1.23	1.12	1.33	1362507	-1.3	0.8534	ALIGNED								1.26	1.19	1.44	8651198	0.3	0.9915	TRUE	1.23	1.13	1.37	5751601	-0.3	0.9933	TRUE
sp|P02662|CASA1_BOVIN	SVEQK	295.6608++	2	295.661	SVEQK	0.82	0.77	0.87	47377248	-1.5	0.9839	TRUE																						1.08	1.03	1.1	25022	-3.5	0.8571	ALIGNED
sp|P02662|CASA1_BOVIN	SVEQK	670.2807+	1	670.281	S[+80]VEQK	0.99	0.93	1.06	402697120	-1.3	0.9906	TRUE	0.99	0.91	1.06	289845344	-1.7	0.9918	TRUE	0.99	0.93	1.06	87109632	-1.4	0.9827	TRUE	0.98	0.92	1.09	45980244	-0.9	0.9924	TRUE	1.02	0.97	1.09	52994388	-1.5	0.9924	TRUE
sp|P02662|CASA1_BOVIN	SVEQK	335.6440++	2	335.644	S[+80]VEQK	1	0.93	1.06	106506720	-1.7	0.9867	TRUE	0.99	0.91	1.06	82724856	-1.9	0.978	TRUE	0.99	0.93	1.06	22091298	-1.8	0.9891	TRUE	1	0.92	1.09	29963970	-1.4	0.9876	TRUE	1.04	0.97	1.09	31602474	-2.1	0.988	TRUE
sp|P02662|CASA1_BOVIN	SVEQKHIQKE	435.8781+++	3	435.878	S[+80]VEQKHIQKE																						3.44	3.39	3.53	9369718	0.2	0.9862	TRUE	3.49	3.4	3.6	6922672	-0.7	0.9901	ALIGNED	3.49	3.42	3.64	357650	-0.4	0.9435	ALIGNED
sp|P02662|CASA1_BOVIN	KHIQKEDVPSER	367.1994++++	4	367.199	KHIQKEDVPSER																						4.21	4.06	4.37	423444	0.6	0.9835	ALIGNED	4.23	4.09	4.46	4748926	-1.5	0.9917	TRUE	4.23	4.13	4.47	701667	-2.7	0.9751	ALIGNED
sp|P02662|CASA1_BOVIN	HIQKEDVPSER	669.3440++	2	669.344	HIQKEDVPSER	4.89	4.8	4.99	76811920	-0.7	0.9905	TRUE	4.88	4.79	4.98	57967080	-0.8	0.9952	TRUE	4.89	4.81	4.99	4246071	-0.5	0.9893	TRUE	4.91	4.82	5.09	158738	-0.6	0.9187	TRUE	4.97	4.87	5.1	638491	-1.1	0.9329	TRUE	4.97	4.85	5.03	23767	-3.1	0.8637	ALIGNED
sp|P02662|CASA1_BOVIN	HIQKEDVPSER	446.5651+++	3	446.565	HIQKEDVPSER	4.89	4.8	4.99	335496032	-0.7	0.9955	TRUE	4.88	4.79	4.98	256509232	-0.9	0.9942	TRUE	4.89	4.81	4.99	19884360	-0.6	0.9646	TRUE	4.93	4.82	5.09	2680763	0.3	0.9858	TRUE	4.95	4.87	5.1	7934259	-1	0.9695	TRUE	4.96	4.85	5.03	696505	-1.6	0.9607	ALIGNED
sp|P02662|CASA1_BOVIN	HIQKE	327.6821++	2	327.682	HIQKE	0.76	0.73	0.84	123469064	-1.8	0.9821	TRUE	0.76	0.72	0.83	95802904	-2	0.9818	ALIGNED	0.77	0.73	0.84	91167544	-1.8	0.9894	ALIGNED	0.9	0.87	1.15	1693835	0.4	0.9755	ALIGNED
sp|P02662|CASA1_BOVIN	HIQKEDVPSE	1181.5797+	1	1181.58	HIQKEDVPSE	5.6	5.51	5.71	14846263	1	0.9884	TRUE	5.59	5.52	5.7	25448234	0.4	0.997	TRUE	5.59	5.52	5.73	31090482	0.7	0.9915	TRUE
sp|P02662|CASA1_BOVIN	HIQKEDVPSE	591.2935++	2	591.293	HIQKEDVPSE	5.6	5.51	5.71	326199840	0.2	0.9987	TRUE	5.59	5.52	5.7	540943104	-0.4	0.9963	TRUE	5.6	5.52	5.73	621686144	0	0.9957	TRUE								5.65	5.58	5.77	2219406	-0.2	0.9931	ALIGNED
sp|P02662|CASA1_BOVIN	HIQKEDVPSE	394.5314+++	3	394.531	HIQKEDVPSE	5.6	5.51	5.71	103179304	0.1	0.9852	TRUE	5.6	5.52	5.7	183128384	-0.4	0.9947	TRUE	5.6	5.52	5.73	220486016	-0.4	0.9946	TRUE								5.65	5.58	5.77	1031955	-0.2	0.9934	ALIGNED
sp|P02662|CASA1_BOVIN	HIQKE	328.1741++	2	328.174	HIQ[+1]KE	0.89	0.84	0.99	21266762	0.2	0.8799	TRUE															1.17	1.1	1.22	398978	2.3	0.8094	ALIGNED
sp|P02662|CASA1_BOVIN	HIQKEDVPS	526.7722++	2	526.772	HIQKEDVPS	5.12	5.03	5.2	52791260	-0.2	0.9909	TRUE	5.1	5.01	5.2	17393760	0.7	0.9477	ALIGNED	5.13	5.06	5.2	6731855	1.2	0.9805	ALIGNED	5.14	5.05	5.25	5092457	0.7	0.9891	TRUE	5.18	5.09	5.4	6382233	-0.3	0.9858	ALIGNED	5.18	5.12	5.27	512714	-0.3	0.9421	ALIGNED
sp|P02662|CASA1_BOVIN	HIQK	525.3144+	1	525.314	HIQK	0.67	0.64	0.73	980136448	-1.2	0.9841	TRUE	0.67	0.63	0.73	837654848	-1.7	0.9857	TRUE	0.67	0.63	0.73	204917152	-1.5	0.982	TRUE
sp|P02662|CASA1_BOVIN	HIQ	397.2194+	1	397.219	HIQ	0.97	0.91	1.04	2108382336	-1.4	0.9811	TRUE	0.96	0.91	1.05	4023407872	-1.4	0.9853	TRUE	0.96	0.91	1.04	5488624128	-1.2	0.9859	TRUE	0.98	0.93	1.09	7990517	-0.6	0.9723	ALIGNED	1.03	0.98	1.13	23180322	-1.3	0.98	TRUE	1.03	0.98	1.18	3877779	-1.6	0.9748	ALIGNED
sp|P02662|CASA1_BOVIN	HIQ	398.2034+	1	398.203	HIQ[+1]	1.13	1.03	1.2	26458768	-0.9	0.9878	ALIGNED	1.13	1.01	1.2	11211675	-1.4	0.9505	ALIGNED	1.12	1.01	1.18	5604965	0	0.9192	ALIGNED	1.23	1.19	1.46	1358693	0.7	0.9585	TRUE	1.29	1.28	1.53	591813	-0.4	0.911	ALIGNED	1.6	1.53	1.73	384561	-0.6	0.9497	TRUE
sp|P02662|CASA1_BOVIN	IQKEDVPSE	522.7640++	2	522.764	IQKEDVPSE	6.35	6.28	6.45	122700824	0.6	0.9952	TRUE	6.34	6.27	6.44	197114896	-0.3	0.9977	TRUE	6.36	6.29	6.46	252996080	0.1	0.9925	ALIGNED	6.4	6.31	6.48	3262303	1.2	0.9939	ALIGNED	6.4	6.31	6.5	8617588	1.1	0.9929	ALIGNED	6.4	6.31	6.54	2448138	1.1	0.9946	TRUE
sp|P02662|CASA1_BOVIN	IQKEDVPSER	600.8146++	2	600.815	IQKEDVPSER	5.52	5.45	5.6	40519048	-0.1	0.9895	TRUE	5.51	5.44	5.59	28005228	-0.6	0.992	TRUE	5.51	5.46	5.63	2086906	0.9	0.8986	ALIGNED	5.56	5.47	5.65	1101327	-0.2	0.9765	TRUE	5.56	5.49	5.69	3817269	-1.3	0.9813	TRUE	5.56	5.48	5.74	285571	-0.8	0.8902	ALIGNED
sp|P02662|CASA1_BOVIN	IQKEDVPSER	400.8788+++	3	400.879	IQKEDVPSER	5.5	5.45	5.6	130554560	-0.2	0.9887	TRUE	5.51	5.44	5.59	91869928	-1.1	0.9876	TRUE	5.51	5.46	5.63	8475141	0.1	0.9726	ALIGNED	5.56	5.47	5.65	8467884	-0.2	0.9955	TRUE	5.56	5.49	5.69	21384014	-0.9	0.9925	TRUE	5.56	5.48	5.74	2566596	-1	0.9915	ALIGNED
sp|P02662|CASA1_BOVIN	KEDVPSE	803.3781+	1	803.378	KEDVPSE	4.68	4.56	4.8	56365900	-0.8	0.9864	TRUE	4.67	4.55	4.79	72066952	-0.9	0.9871	TRUE	4.71	4.58	4.81	38129544	-0.6	0.9942	TRUE	4.75	4.61	4.85	7824623	-0.7	0.9895	TRUE	4.79	4.65	4.92	21920034	-1.1	0.9886	TRUE	4.8	4.7	4.95	774215	-1.7	0.9934	ALIGNED
sp|P02662|CASA1_BOVIN	KEDVPSE	402.1927++	2	402.193	KEDVPSE							TRUE	4.69	4.55	4.79	134070296	5	0.9293	TRUE	4.71	4.58	4.81	76604960	4.3	0.9473	TRUE	4.75	4.61	4.85	24426484	-0.9	0.9934	TRUE	4.8	4.65	4.92	60009140	-1.3	0.9957	TRUE	4.8	4.7	4.95	4209063	-2.1	0.9381	ALIGNED
sp|P02662|CASA1_BOVIN	KEDVPS	674.3355+	1	674.336	KEDVPS	3.84	3.63	3.98	54379796	0.2	0.9808	TRUE	3.83	3.63	3.97	21897948	-0.1	0.9215	TRUE	3.85	3.74	3.98	2013438	2.6	0.8969	ALIGNED	3.9	3.7	4.02	20621968	-0.4	0.9928	TRUE	3.97	3.77	4.09	30010276	-0.9	0.9892	TRUE	3.98	3.8	4.12	632236	-0.1	0.9731	TRUE
sp|P02662|CASA1_BOVIN	KEDVPS	337.6714++	2	337.671	KEDVPS	3.85	3.63	3.98	84268336	-0.8	0.9831	TRUE	3.83	3.63	3.97	37046832	-1	0.9769	TRUE	3.85	3.74	3.98	2401857	-2	0.84	ALIGNED	3.9	3.7	4.02	47196988	-0.8	0.9947	TRUE	3.96	3.77	4.09	58660448	-1.4	0.9925	TRUE	3.96	3.8	4.12	2590269	-1	0.9802	TRUE
sp|P02662|CASA1_BOVIN	KEDVPSERY	374.8524+++	3	374.852	KEDVPSERY	6.45	6.39	6.58	824761	0.6	0.8737	ALIGNED															6.47	6.41	6.62	1565180	0.1	0.982	ALIGNED	6.52	6.43	6.72	2510731	0	0.9897	TRUE	6.52	6.42	6.62	2753773	0	0.9985	TRUE
sp|P02662|CASA1_BOVIN	KEDVPSER	959.4793+	1	959.479	KEDVPSER	3.88	3.77	3.98	12558659	1.2	0.984	TRUE	3.86	3.72	3.98	5617164	1	0.9875	TRUE								3.96	3.83	4.06	975925	0.2	0.9858	TRUE	3.98	3.86	4.14	2903559	-0.3	0.9965	TRUE
sp|P02662|CASA1_BOVIN	KEDVPSER	480.2433++	2	480.243	KEDVPSER	3.88	3.77	3.98	138524832	-0.2	0.9874	TRUE	3.87	3.72	3.98	65432992	-0.7	0.9891	TRUE	3.89	3.77	3.98	2206350	-0.7	0.8726	ALIGNED	3.96	3.83	4.06	32712540	-0.4	0.9968	TRUE	3.98	3.86	4.14	67007764	-1.2	0.9967	TRUE	4	3.86	4.15	2643915	-0.9	0.9881	TRUE
sp|P02662|CASA1_BOVIN	KEDVPSER	320.4979+++	3	320.498	KEDVPSER	3.88	3.77	3.98	59368652	-0.3	0.9884	TRUE	3.87	3.72	3.98	28020952	-0.7	0.989	TRUE	3.91	3.77	3.98	1027912	-0.3	0.9597	ALIGNED	3.96	3.83	4.06	15466277	-0.5	0.991	TRUE	3.98	3.86	4.14	33442214	-1.1	0.9927	TRUE	4	3.86	4.15	1466985	-0.9	0.9853	TRUE
sp|P02662|CASA1_BOVIN	EDVPSE	675.2832+	1	675.283	EDVPSE	5.54	5.47	5.75	1340933120	-0.2	0.9943	TRUE	5.54	5.47	5.66	2360946688	-0.9	0.9956	ALIGNED	5.55	5.47	5.66	2449229312	-0.5	0.9955	ALIGNED	5.57	5.46	5.7	12023972	-0.2	0.989	ALIGNED	5.57	5.49	5.69	55506772	-1.5	0.9907	TRUE	5.57	5.5	5.68	1052473	-0.6	0.9591	ALIGNED
sp|P02662|CASA1_BOVIN	EDVPSERY	497.7274++	2	497.727	EDVPSERY	7.42	7.35	7.66	41492184	-0.6	0.9809	TRUE	7.4	7.33	7.66	46166560	-0.9	0.9933	TRUE								7.46	7.38	7.68	3790313	0.6	0.9891	ALIGNED	7.48	7.39	7.68	7638709	-0.2	0.9954	ALIGNED	7.47	7.39	7.67	4317681	-0.9	0.9803	ALIGNED
sp|P02662|CASA1_BOVIN	EDVPSER	831.3843+	1	831.384	EDVPSER	4.63	4.54	4.75	788568448	-1	0.9914	TRUE	4.62	4.51	4.75	772983424	-1.5	0.9959	TRUE	4.66	4.53	4.76	65058672	-0.6	0.9836	TRUE	4.7	4.63	4.83	6254032	-0.6	0.9896	TRUE	4.71	4.65	4.84	21611124	-1.4	0.9941	TRUE
sp|P02662|CASA1_BOVIN	EDVPSER	416.1958++	2	416.196	EDVPSER	4.63	4.54	4.75	2678381824	-0.5	0.9944	TRUE	4.61	4.51	4.75	2493991168	-1.1	0.9943	TRUE	4.66	4.53	4.76	262096496	-0.4	0.9692	TRUE	4.7	4.63	4.83	35990904	-0.8	0.9954	TRUE	4.72	4.65	4.84	123619016	-1.5	0.9941	TRUE	4.72	4.66	4.84	3162470	-1.7	0.9257	ALIGNED
sp|P02662|CASA1_BOVIN	DVPSERYLGY	599.7906++	2	599.791	DVPSERYLGY																						12.21	12.07	12.37	1409589	1.6	0.9914	TRUE	12.17	12.08	12.26	318176	0.9	0.9189	ALIGNED	12.13	12.03	12.32	8196970	0.3	0.9938	TRUE
sp|P02662|CASA1_BOVIN	DVPSER	702.3417+	1	702.342	DVPSER	3.56	3.48	3.82	120575728	-0.2	0.989	TRUE	3.53	3.46	3.82	65190880	-0.8	0.9825	TRUE	3.57	3.41	3.65	1909861	-0.2	0.8391	ALIGNED	3.62	3.55	3.96	62275464	-0.7	0.9917	TRUE	3.66	3.57	3.99	172784560	-1.5	0.9927	TRUE	3.65	3.54	3.94	2132703	0.4	0.9798	TRUE
sp|P02662|CASA1_BOVIN	DVPSER	351.6745++	2	351.674	DVPSER	3.56	3.48	3.82	182406144	-0.3	0.9846	TRUE	3.55	3.46	3.82	88518400	-0.8	0.9668	TRUE	3.55	3.41	3.65	2582469	-0.2	0.8789	ALIGNED	3.64	3.55	3.96	143885840	-0.8	0.9949	TRUE	3.66	3.57	3.99	245832320	-1.6	0.9928	TRUE	3.67	3.54	3.94	8285399	-0.2	0.9844	TRUE
sp|P02662|CASA1_BOVIN	DVPSERYLG	518.2589++	2	518.259	DVPSERYLG																						9.99	9.88	10.23	11113548	0.8	0.9959	TRUE	9.96	9.86	10.17	5143042	0.3	0.998	ALIGNED	9.94	9.85	10.14	7169118	-0.9	0.9896	TRUE
sp|P02662|CASA1_BOVIN	DVPSE	546.2406+	1	546.241	DVPSE	4.24	4.15	4.59	391029248	0	0.9858	ALIGNED	4.26	4.15	4.5	434930784	-0.4	0.9797	TRUE	4.27	4.17	4.49	178351392	-0.2	0.9894	TRUE	4.28	4.19	4.62	173872544	-0.2	0.9937	ALIGNED	4.32	4.22	4.64	659792448	-1.2	0.9935	TRUE	4.31	4.22	4.68	15544108	-1	0.9874	ALIGNED
sp|P02662|CASA1_BOVIN	DVPSERY	433.2061++	2	433.206	DVPSERY																						6.91	6.81	7.25	49454980	0.3	0.9968	TRUE	6.91	6.81	7.25	72777488	-0.5	0.9945	TRUE	6.92	6.81	7.24	50358992	-1	0.9855	TRUE
sp|P02662|CASA1_BOVIN	VPSERYL	432.2347++	2	432.235	VPSERYL																						9.73	9.64	9.97	21951854	-0.9	0.9926	TRUE	9.77	9.68	9.98	11211020	-0.9	0.9882	TRUE	9.53	9.43	9.9	45871636	-3.7	0.8523	ALIGNED
sp|P02662|CASA1_BOVIN	VPSE	431.2136+	1	431.214	VPSE	3.18	3.14	3.54	213765824	-0.2	0.9793	TRUE	3.19	3.13	3.51	110290184	-0.5	0.9771	ALIGNED	3.2	3.15	3.27	16352083	-0.5	0.9653	ALIGNED	3.23	3.16	3.54	204930256	-1.4	0.9865	TRUE	3.29	3.23	3.6	232200112	-1.7	0.9847	TRUE	3.29	3.22	3.65	3227292	-1	0.9765	TRUE
sp|P02662|CASA1_BOVIN	VPSER	294.1610++	2	294.161	VPSER	2.26	2.19	2.48	50993028	-0.1	0.9726	ALIGNED	2.24	2.2	2.42	17166412	-0.1	0.9712	ALIGNED								2.33	2.26	2.57	34807752	-1.8	0.9775	TRUE	2.38	2.32	2.6	48249820	-2	0.9799	TRUE	2.42	2.33	2.65	1067953	-1	0.9479	TRUE
sp|P02662|CASA1_BOVIN	VPSERY	375.6927++	2	375.693	VPSERY																						5.86	5.79	6.2	19286940	-0.4	0.9903	TRUE	5.91	5.78	6.25	25090246	-0.2	0.9889	TRUE	5.92	5.78	6.23	10619365	-0.6	0.9922	TRUE
sp|P02662|CASA1_BOVIN	PSE	332.1452+	1	332.145	PSE	4.24	4.17	4.48	10811660	-0.5	0.9515	ALIGNED	4.24	4.17	4.47	12411781	-0.7	0.9028	ALIGNED	4.25	4.18	4.46	5114840	-0.1	0.9645	ALIGNED	4.29	4.18	4.61	4957456	-1.4	0.9928	ALIGNED	4.32	4.21	4.65	20803546	-2.5	0.994	TRUE	4.33	4.24	4.62	612093	-2.3	0.8571	ALIGNED
sp|P02662|CASA1_BOVIN	PSERY	651.3097+	1	651.31	PSERY																						6.9	6.81	7.23	11632707	0.4	0.9866	TRUE	6.91	6.81	7.25	20683320	-0.1	0.9862	ALIGNED	6.93	6.83	7.27	14143719	-0.6	0.9895	ALIGNED
sp|P02662|CASA1_BOVIN	PSER	244.6268++	2	244.627	PSER	3.57	3.48	3.8	15522655	-0.5	0.952	ALIGNED	3.55	3.46	3.76	7615784	-1.2	0.9641	ALIGNED								3.62	3.55	3.87	9076143	-0.8	0.9767	TRUE	3.66	3.57	3.92	21053992	-1.4	0.9758	TRUE	3.67	3.58	3.9	721326	-0.2	0.9697	ALIGNED
sp|P02662|CASA1_BOVIN	ERYLGY	400.7005++	2	400.701	ERYLGY																						9.64	9.55	9.79	4896270	-0.1	0.992	ALIGNED	9.65	9.57	9.88	3615728	-0.3	0.9702	TRUE	9.64	9.57	9.88	6104887	-3.4	0.9961	ALIGNED
sp|P02662|CASA1_BOVIN	ERYLGYLEQ	585.7931++	2	585.793	ERYLGYLEQ																						12.41	12.32	12.54	6092434	1.7	0.9901	TRUE	12.39	12.19	12.41	1601898	3.1	0.9912	ALIGNED	12.47	12.27	12.56	2483796	-2.1	0.8686	ALIGNED
sp|P02662|CASA1_BOVIN	ERYLGYLE	521.7638++	2	521.764	ERYLGYLE	12.77	12.64	12.91	16270801	-0.5	0.9246	ALIGNED	12.75	12.64	12.88	10805175	-0.6	0.9578	ALIGNED								12.71	12.57	12.98	56537016	-2.2	0.9161	TRUE	12.68	12.56	12.94	57751824	-1.7	0.9066	ALIGNED	12.66	12.52	12.76	13446275	-1.7	0.8957	ALIGNED
sp|P02662|CASA1_BOVIN	RYLGY	336.1792++	2	336.179	RYLGY															8.72	8.55	8.92	4676854	4.5	0.8819	ALIGNED															8.78	8.61	8.97	5077722	0.4	0.9658	TRUE
sp|P02662|CASA1_BOVIN	YLG	352.1867+	1	352.187	YLG	5.31	5.22	5.46	1900846336	-0.8	0.9872	TRUE	5.3	5.21	5.45	2625448704	-0.7	0.988	TRUE	5.33	5.26	5.49	2621781760	-0.4	0.9877	TRUE	5.4	5.31	5.53	43532540	0.6	0.9862	TRUE	5.47	5.38	5.6	115990656	-0.3	0.9887	TRUE	5.47	5.38	5.6	7799691	-0.7	0.9836	TRUE
sp|P02662|CASA1_BOVIN	YLGY	515.2500+	1	515.25	YLGY	10.29	10.23	10.38	19019536	-1.8	0.8981	ALIGNED								10.3	10.23	10.38	4569589	-4	0.8462	ALIGNED	10.42	10.33	10.56	8714158	0.5	0.9891	TRUE	10.42	10.3	10.55	20956146	0.4	0.9901	TRUE	10.41	10.32	10.54	42027524	-0.3	0.9902	TRUE
sp|P02662|CASA1_BOVIN	YLGYLEQ	886.4193+	1	886.419	YLGYLEQ[+1]																						13.58	13.49	13.69	1250302	2.5	0.991	TRUE	13.56	13.46	13.69	2684822	3.3	0.9822	TRUE	13.51	13.44	13.6	495254	1.4	0.9432	ALIGNED
sp|P02662|CASA1_BOVIN	YLGYLE	757.3767+	1	757.377	YLGYLE																						13.67	13.56	13.79	128163744	0.2	0.9956	TRUE	13.64	13.55	13.79	129508784	1.4	0.994	TRUE	13.62	13.52	13.76	33956552	0.6	0.9895	TRUE
sp|P02662|CASA1_BOVIN	YLGYLE	379.1920++	2	379.192	YLGYLE	13.74	13.68	13.8	533804	1.7	0.9197	ALIGNED	13.54	13.49	13.98	1030568	-1	0.8968	ALIGNED								13.65	13.56	13.79	14353287	0	0.9921	TRUE	13.64	13.55	13.79	10837845	1	0.9942	TRUE	13.6	13.52	13.76	3101350	0.5	0.987	TRUE
sp|P02662|CASA1_BOVIN	YLGYLEQ	885.4353+	1	885.435	YLGYLEQ																						12.91	12.8	13.05	14725302	1.9	0.9934	TRUE	12.87	12.78	13.02	23348780	3.4	0.991	TRUE
sp|P02662|CASA1_BOVIN	YLGYLEQ	443.2213++	2	443.221	YLGYLEQ																						12.91	12.8	13.05	22085948	2.3	0.9937	TRUE	12.87	12.78	13.02	26908258	2.8	0.9974	TRUE	12.84	12.78	13.04	4475789	1.2	0.9256	TRUE
sp|P02662|CASA1_BOVIN	YLGYL	628.3341+	1	628.334	YLGYL	14.89	14.82	15	83312552	-0.1	0.9854	TRUE	14.87	14.78	14.98	118844496	-1	0.9824	TRUE	14.87	14.77	14.94	5665142	2.1	0.842	ALIGNED	14.89	14.78	15.01	34252828	1.7	0.9965	TRUE	14.87	14.76	15.02	49576220	3.7	0.9945	TRUE	14.84	14.73	14.98	9294425	3.1	0.9956	TRUE
sp|P02662|CASA1_BOVIN	YLGYL	314.6707++	2	314.671	YLGYL																						14.89	14.78	15.01	815781	1.1	0.9617	TRUE	14.87	14.76	15.02	815064	2	0.9705	TRUE	14.86	14.73	14.98	153238	3.2	0.8636	TRUE
sp|P02662|CASA1_BOVIN	YLGYLEQL	998.5193+	1	998.519	YLGYLEQL	17.57	17.5	17.76	2584777	2.9	0.971	TRUE	17.57	17.47	17.68	2522618	2.7	0.9638	TRUE	17.49	17.41	17.61	1740784	4	0.8587	ALIGNED	17.49	17.39	17.62	3580791	3	0.9927	TRUE								17.35	17.23	17.5	2860904	3.1	0.9839	TRUE
sp|P02662|CASA1_BOVIN	YLGYLEQL	499.7633++	2	499.763	YLGYLEQL	17.6	17.5	17.76	6591569	2.7	0.9785	TRUE	17.58	17.47	17.68	5990041	2.5	0.9774	TRUE	17.51	17.41	17.61	3209914	4.3	0.9793	ALIGNED	17.49	17.39	17.62	14482804	2	0.9961	TRUE	17.42	17.31	17.58	9563371	4.5	0.9917	TRUE	17.35	17.23	17.5	9152866	2.1	0.9905	TRUE
sp|P02662|CASA1_BOVIN	LGY	352.1867+	1	352.187	LGY	7.46	7.39	7.58	283879584	-1	0.9775	TRUE	7.46	7.38	7.57	381068992	-1	0.9823	TRUE	7.46	7.38	7.56	5659620	-1.2	0.9248	ALIGNED	7.48	7.4	7.57	2137340	-0.1	0.9238	TRUE	7.52	7.45	7.61	6354179	-0.9	0.9584	TRUE	7.53	7.44	7.68	4600298	-1.4	0.8703	TRUE
sp|P02662|CASA1_BOVIN	LGYLEQL	418.2316++	2	418.232	LGYLEQL																						15.84	15.73	15.98	36003888	1	0.9936	ALIGNED	15.79	15.68	15.93	72962096	0.9	0.9928	TRUE	15.74	15.64	15.88	26388264	-0.5	0.9871	TRUE
sp|P02662|CASA1_BOVIN	LGYLEQLLR	552.8242++	2	552.824	LGYLEQLLR																						17.58	17.42	17.72	2068204	0.3	0.9871	TRUE	17.54	17.47	17.72	1774640	4.3	0.9856	TRUE	17.47	17.31	17.64	612720	-0.4	0.9779	ALIGNED
sp|P02662|CASA1_BOVIN	GYLEQ	609.2879+	1	609.288	GYLEQ	7.64	7.54	7.78	35227704	3.4	0.9812	ALIGNED	7.63	7.54	7.78	51047572	3.2	0.9821	ALIGNED	7.63	7.46	7.78	39372980	1	0.9743	TRUE	7.68	7.59	7.8	8797191	0.9	0.9892	ALIGNED	7.69	7.6	7.79	26212832	-0.6	0.9881	TRUE	7.68	7.6	7.81	3164392	-1.3	0.8471	TRUE
sp|P02662|CASA1_BOVIN	GYLEQLLR	496.2822++	2	496.282	GYLEQLLR																						15.89	15.8	16.04	3425830	2.2	0.9866	TRUE	15.86	15.75	16.06	4637611	4.4	0.9902	TRUE	15.8	15.73	16.01	1474670	2.3	0.9658	TRUE
sp|P02662|CASA1_BOVIN	YLE	424.2078+	1	424.208	YLE	5.9	5.82	6.07	24491230	-3.2	0.9788	ALIGNED	5.89	5.81	6.06	18055142	-1.5	0.8806	TRUE	5.91	5.84	6.08	13569180	-1.3	0.8808	ALIGNED	5.92	5.83	6.05	4429795	-1.9	0.9708	TRUE	5.96	5.88	6.09	43714852	-1	0.9811	ALIGNED	5.98	5.91	6.1	11040145	-0.4	0.9885	TRUE
sp|P02662|CASA1_BOVIN	YLEQLLR	467.7715++	2	467.771	YLEQLLR								13.68	13.64	13.85	1133127	-1.2	0.8533	ALIGNED	13.66	13.6	13.78	629252	-0.1	0.8211	ALIGNED	13.66	13.59	13.81	29015608	0.6	0.9926	TRUE	13.67	13.58	13.85	33986840	1.9	0.9927	TRUE	13.62	13.53	13.79	4706069	1	0.9921	TRUE
sp|P02662|CASA1_BOVIN	YLEQL	666.3345+	1	666.334	YLEQ[+1]L																						12.67	12.58	12.81	24055084	0.8	0.992	ALIGNED	12.65	12.56	12.8	66225996	1	0.9942	TRUE	12.64	12.52	12.78	8063103	0.2	0.99	ALIGNED
sp|P02662|CASA1_BOVIN	YLEQ	553.2504+	1	553.25	YLEQ[+1]	6.64	6.58	6.7	7328045	-0.2	0.9665	ALIGNED	6.65	6.56	6.69	6607079	-1	0.9888	ALIGNED	6.67	6.6	6.73	4470837	1.6	0.9817	ALIGNED	6.68	6.6	6.78	8063046	-0.4	0.9916	ALIGNED	6.71	6.62	6.79	31561024	-2	0.9887	TRUE	6.71	6.64	6.81	1653458	-0.7	0.9944	ALIGNED
sp|P02662|CASA1_BOVIN	YLEQ	552.2664+	1	552.266	YLEQ	5.61	5.51	5.75	72541128	1.1	0.9749	ALIGNED	5.61	5.52	5.72	86346568	0.3	0.9911	ALIGNED	5.62	5.55	5.74	68445920	0.7	0.9829	TRUE	5.63	5.56	5.74	22693520	0.8	0.9919	TRUE	5.65	5.58	5.77	101699240	-0.1	0.9903	ALIGNED	5.66	5.57	5.77	8167166	0.1	0.9871	ALIGNED
sp|P02662|CASA1_BOVIN	YLEQLLRL	524.3135++	2	524.313	YLEQLLRL															18.8	18.31	19.02	12148518	-1.7	0.9827	ALIGNED	18.42	18.26	18.57	4093719	2.1	0.993	TRUE	18.37	18.28	18.55	3970128	3.6	0.991	TRUE
sp|P02662|CASA1_BOVIN	YLEQL	665.3505+	1	665.35	YLEQL	12.05	11.97	12.21	18085606	-1.3	0.9375	TRUE	12.03	11.94	12.2	24325936	-2	0.9108	ALIGNED								12.03	11.92	12.15	58806116	0.2	0.992	ALIGNED	12.01	11.92	12.14	197509072	-0.4	0.995	TRUE	12.01	11.9	12.12	44114552	-1.8	0.987	ALIGNED
sp|P02662|CASA1_BOVIN	LEQLLR	386.2398++	2	386.24	LEQLLR																						10.41	10.32	10.57	6934123	-0.3	0.9786	TRUE	10.44	10.35	10.71	8244923	-0.3	0.9846	TRUE	10.41	10.08	10.67	6452566	-1.4	0.9811	TRUE
sp|P02662|CASA1_BOVIN	LEQLLRLK	338.2220+++	3	338.222	LEQLLRLK																													12.3	12.21	12.41	109824	1.4	0.9304	ALIGNED	12.27	12.18	12.46	3276799	0.9	0.9893	TRUE
sp|P02662|CASA1_BOVIN	LEQLLRL	442.7818++	2	442.782	LEQLLRL																						15.82	15.73	15.93	5213453	1.3	0.9859	TRUE	15.82	15.73	16.07	16862734	2.9	0.99	TRUE	15.79	15.69	15.99	11139243	1	0.9924	TRUE
sp|P02662|CASA1_BOVIN	LEQ	390.1871+	1	390.187	LEQ[+1]	3.43	3.37	3.53	437299552	-0.8	0.9758	TRUE	3.42	3.28	3.65	536871424	-0.9	0.9952	ALIGNED	3.45	3.4	3.57	550651712	-1.1	0.9858	ALIGNED	3.35	3.26	3.55	10424494	-0.6	0.9767	ALIGNED								3.44	3.35	3.53	102120024	-1.2	0.9913	ALIGNED
sp|P02662|CASA1_BOVIN	LEQL	503.2712+	1	503.271	LEQ[+1]L	9.89	9.81	10.03	1077391104	-0.4	0.9833	ALIGNED	9.89	9.8	10.01	1152584832	-1.1	0.986	ALIGNED	9.92	9.82	10.03	1050026688	-0.5	0.9855	ALIGNED	9.93	9.84	10.06	82443768	0.6	0.9921	ALIGNED	9.97	9.88	10.09	218626256	0.8	0.9931	TRUE	9.95	9.86	10.09	599044096	-0.4	0.9936	ALIGNED
sp|P02662|CASA1_BOVIN	LEQLL	615.3712+	1	615.371	LEQLL	13.83	13.73	13.96	206234416	0.2	0.989	TRUE	13.8	13.72	13.94	235161248	-0.3	0.9862	TRUE	13.77	13.69	13.87	3083049	2.6	0.9188	ALIGNED	13.75	13.52	13.82	2415815	2	0.9856	ALIGNED	13.77	13.68	13.95	9308085	2.6	0.9959	TRUE	13.73	13.64	13.87	16801474	0.4	0.99	TRUE
sp|P02662|CASA1_BOVIN	LEQLL	308.1892++	2	308.189	LEQLL	13.83	13.73	13.96	59738192	-0.3	0.9828	TRUE	13.82	13.72	13.94	70132520	-0.6	0.9825	TRUE	13.77	13.69	13.87	1097338	-0.6	0.9298	ALIGNED								13.77	13.68	13.95	4885149	1.7	0.9913	TRUE	13.73	13.64	13.87	8335110	-0.1	0.9844	TRUE
sp|P02662|CASA1_BOVIN	LEQLLRL	443.2738++	2	443.274	LEQ[+1]LLRL																													16.3	16.2	16.42	715746	-0.1	0.9636	TRUE
sp|P02662|CASA1_BOVIN	EQLLRL	386.2398++	2	386.24	EQLLRL																						13.89	13.79	14.04	11124807	0.4	0.9874	TRUE	13.93	13.83	14.13	35514496	-0.5	0.9902	TRUE	13.88	13.79	14.08	11663086	-1.9	0.9905	TRUE
sp|P02662|CASA1_BOVIN	EQLL	503.2712+	1	503.271	EQ[+1]LL																						11.48	11.39	11.61	1112150	0	0.9752	ALIGNED	11.5	11.4	11.62	9634247	0.1	0.9895	TRUE	11.5	11.4	11.63	5064267	-1.5	0.9707	ALIGNED
sp|P02662|CASA1_BOVIN	EQLLR	329.6978++	2	329.698	EQLLR																						7.35	7.26	7.47	10713936	-1.4	0.9804	TRUE	7.41	7.31	7.57	12591156	-1.1	0.9857	TRUE	7.41	7.33	7.57	4307531	-2.1	0.9841	TRUE
sp|P02662|CASA1_BOVIN	QLLRL	321.7185++	2	321.718	QLLRL																						13.16	13.07	13.29	6045968	1.1	0.9805	TRUE
sp|P02662|CASA1_BOVIN	QLLR	265.1765++	2	265.176	QLLR																						6.16	6.06	6.27	4765132	-0.1	0.9787	TRUE	6.23	6.14	6.41	10529152	-1.4	0.9807	TRUE	6.23	6.14	6.43	1450673	-2.1	0.9676	ALIGNED
sp|P02662|CASA1_BOVIN	LLRLK	214.8269+++	3	214.827	LLRLK																						7.72	7.68	7.83	27843	-0.2	0.8082	ALIGNED	7.8	7.72	7.98	274846	-0.9	0.8185	ALIGNED	7.79	7.72	7.91	2049755	0.1	0.9593	TRUE
sp|P02662|CASA1_BOVIN	LRLKKY	274.1850+++	3	274.185	LRLKKY																													5.64	5.59	5.75	251810	-0.7	0.981	ALIGNED	5.62	5.57	5.83	15588393	-0.9	0.9855	TRUE
sp|P02662|CASA1_BOVIN	RLKKY	236.4903+++	3	236.49	RLKKY																																				1.54	1.45	1.83	4472998	0.1	0.9613	TRUE
sp|P02662|CASA1_BOVIN	LKKY	276.1812++	2	276.181	LKKY	2.15	2.04	2.26	6222636	0	0.9512	ALIGNED	2.14	1.96	2.21	5399010	-0.5	0.9312	ALIGNED	2.15	2.07	2.24	920027	-0.2	0.8327	ALIGNED															2.35	2.28	2.53	5335403	-1	0.9741	TRUE
sp|P02662|CASA1_BOVIN	KKY	438.2711+	1	438.271	KKY	0.69	0.64	0.74	112839592	-1.2	0.9765	TRUE	0.69	0.64	0.74	80083896	-1.6	0.9825	TRUE
sp|P02662|CASA1_BOVIN	KKYKVPQLEIVPN	519.3117+++	3	519.312	KKYKVPQLEIVPN																						12.07	11.94	12.27	14910321	1.1	0.9948	TRUE	12.14	11.87	12.47	14309448	2.2	0.9928	TRUE	12.09	12.01	12.18	873238	4.3	0.8973	ALIGNED
sp|P02662|CASA1_BOVIN	KKYKVPQLEIVPN	389.7356++++	4	389.736	KKYKVPQLEIVPN																						12.07	11.94	12.27	6383463	0.6	0.9962	TRUE	12.14	11.87	12.47	6381594	0.6	0.997	TRUE	12.14	12.01	12.18	230321	-0.1	0.9315	ALIGNED
sp|P02662|CASA1_BOVIN	KKYKVPQ	297.5201+++	3	297.52	KKYKVPQ																						3.8	3.67	4	14729703	-0.5	0.9899	TRUE								3.94	3.85	4.13	877537	0.1	0.9935	ALIGNED
sp|P02662|CASA1_BOVIN	KYKVPQL	438.2711++	2	438.271	KYKVPQL																						10.4	9.97	10.56	14350074	0.1	0.9948	ALIGNED	10.48	10.1	10.73	16506295	0.2	0.9936	ALIGNED	10.46	10.05	10.72	61422052	-0.6	0.9912	TRUE
sp|P02662|CASA1_BOVIN	KYKVPQLEIVPN	476.6134+++	3	476.613	KYKVPQLEIVPN																						13.45	13.25	13.6	7480936	2.5	0.9889	TRUE	13.47	13.28	13.74	6367412	3.2	0.9961	ALIGNED	13.43	13.26	13.66	2586166	1.9	0.9663	ALIGNED
sp|P02662|CASA1_BOVIN	KYKVPQ	762.4509+	1	762.451	KYKVPQ																						4.9	4.84	5.04	1858142	0	0.9871	TRUE	5	4.93	5.22	3138183	-1.5	0.98	TRUE	5.01	4.92	5.17	1409877	-1.8	0.98	TRUE
sp|P02662|CASA1_BOVIN	KYKVPQ	381.7291++	2	381.729	KYKVPQ	4.88	4.82	4.95	905807	-1.5	0.8155	ALIGNED	4.85	4.81	4.94	784918	-1.3	0.8221	ALIGNED								4.92	4.84	5.04	10710371	0.9	0.9899	TRUE	5	4.93	5.22	11228027	-1.2	0.9895	TRUE	5.01	4.92	5.17	4039043	-2	0.9877	TRUE
sp|P02662|CASA1_BOVIN	YKVPQL	374.2236++	2	374.224	YKVPQL	12.19	11.84	12.35	506837408	-0.2	0.9905	TRUE	12.17	11.85	12.34	787953344	-0.6	0.9914	TRUE								12.16	11.76	12.33	16749738	0.9	0.9865	ALIGNED	12.18	11.81	12.36	17153316	0.6	0.9874	ALIGNED	12.18	11.76	12.32	58916460	-0.1	0.9901	TRUE
sp|P02662|CASA1_BOVIN	YKVPQ	634.3559+	1	634.356	YKVPQ	6.26	6.19	6.37	636944768	-0.4	0.9906	TRUE	6.25	6.17	6.36	907376064	-0.8	0.9919	TRUE	6.27	6.2	6.39	372696672	-0.6	0.9894	TRUE	6.29	6.21	6.39	11334014	0	0.988	ALIGNED	6.32	6.23	6.46	11049772	-0.1	0.9894	TRUE	6.32	6.25	6.46	1077604	0.2	0.9784	TRUE
sp|P02662|CASA1_BOVIN	YKVPQ	317.6816++	2	317.682	YKVPQ	6.26	6.19	6.37	1388535808	-0.4	0.9923	TRUE	6.25	6.17	6.36	1920567424	-0.6	0.9938	TRUE	6.27	6.2	6.39	863279104	-0.6	0.9923	TRUE	6.29	6.21	6.39	42200868	-0.2	0.9907	ALIGNED	6.32	6.23	6.46	28350404	-0.3	0.9884	TRUE	6.32	6.25	6.46	5892656	-0.3	0.9837	TRUE
sp|P02662|CASA1_BOVIN	YKVPQ	318.1736++	2	318.174	YKVPQ[+1]	6.92	6.86	7	5525267	-2.8	0.8431	ALIGNED	6.9	6.86	7.02	1578208	-2.6	0.8212	ALIGNED	6.94	6.89	7.04	705245	1.6	0.8258	ALIGNED	6.96	6.88	7.08	4247529	-0.1	0.9888	TRUE	7.01	6.92	7.12	4144539	-0.5	0.9782	TRUE	7.01	6.93	7.14	912602	-0.9	0.9717	ALIGNED
sp|P02662|CASA1_BOVIN	KVP	343.2340+	1	343.234	KVP	3.73	3.58	3.97	5911844	-0.7	0.9217	ALIGNED	3.72	3.59	3.89	5639020	-0.9	0.8959	ALIGNED	3.77	3.63	3.94	19410160	-0.6	0.9745	TRUE								3.95	3.87	4	102377	-0.1	0.8945	ALIGNED	3.94	3.66	4.06	664383	0.3	0.9337	ALIGNED
sp|P02662|CASA1_BOVIN	KVPQLEIVPNSAEER	894.9482++	2	894.948	KVPQLEIVPNS[+80]AEER	12.77	12.64	12.91	39222188	1.5	0.9924	TRUE	12.75	12.64	12.89	27307150	1.2	0.9911	TRUE	12.69	12.58	12.83	4294778	1.8	0.9759	TRUE
sp|P02662|CASA1_BOVIN	KVPQLEIVPNSAEER	596.9679+++	3	596.968	KVPQLEIVPNS[+80]AEER	12.77	12.64	12.91	196742128	1.1	0.9956	TRUE	12.75	12.64	12.89	132982192	0.7	0.9946	TRUE	12.71	12.58	12.83	24102224	1.6	0.993	TRUE								12.65	12.65	12.75	92100	1.9	0.8306	ALIGNED
sp|P02662|CASA1_BOVIN	KVPQLEIVPN	568.8373++	2	568.837	KVPQLEIVPN	13.44	13.36	13.57	751992256	0.6	0.9955	TRUE	13.42	13.34	13.55	549937664	0.2	0.9963	TRUE	13.37	13.29	13.53	236168144	1.1	0.9967	TRUE	13.36	13.27	13.5	26669402	1.7	0.9956	TRUE	13.38	13.28	13.54	30159826	2.9	0.9946	TRUE	13.34	13.24	13.48	23736136	2.7	0.9946	TRUE
sp|P02662|CASA1_BOVIN	KVPQLEIVPN	379.5606+++	3	379.561	KVPQLEIVPN	13.44	13.36	13.57	34560616	0.3	0.9883	TRUE	13.42	13.34	13.55	25851634	0	0.9803	TRUE	13.39	13.29	13.53	12645218	0.9	0.9861	TRUE	13.38	13.27	13.5	1611827	1.3	0.9932	TRUE	13.38	13.28	13.54	1834227	2.1	0.9905	TRUE	13.34	13.24	13.48	1459752	2	0.971	TRUE
sp|P02662|CASA1_BOVIN	KVPQLE	713.4192+	1	713.419	KVPQLE	7.95	7.85	8.04	61149660	-0.4	0.9868	TRUE	7.95	7.85	8.05	45646432	-0.8	0.9876	TRUE	7.93	7.86	8.1	12589271	-0.1	0.9753	TRUE	7.95	7.87	8.08	5709494	-0.2	0.9898	TRUE	8.01	7.92	8.18	8527468	-0.3	0.9839	TRUE	7.99	7.89	8.17	1448496	0	0.9707	TRUE
sp|P02662|CASA1_BOVIN	KVPQLE	357.2132++	2	357.213	KVPQLE	7.94	7.85	8.04	87807456	-1	0.9879	TRUE	7.94	7.85	8.05	68529088	-1.5	0.9866	TRUE	7.94	7.86	8.1	23307426	-0.9	0.9667	TRUE	7.95	7.87	8.08	17588936	-0.8	0.9833	TRUE	8.01	7.92	8.18	17448648	-0.4	0.9822	TRUE	7.99	7.89	8.17	7535249	-0.4	0.9757	TRUE
sp|P02662|CASA1_BOVIN	KVPQL	584.3766+	1	584.377	KVPQL	8.84	8.69	9.04	3143386112	-0.6	0.9918	ALIGNED	8.83	8.69	9.01	3138836736	-1.1	0.9913	TRUE	8.93	8.81	9.06	17081244	-1.8	0.9895	ALIGNED	8.97	8.79	9.1	16372428	0.8	0.9868	TRUE	9.03	8.88	9.23	15980471	0.6	0.9789	TRUE	9.03	8.86	9.21	20859398	-0.4	0.981	ALIGNED
sp|P02662|CASA1_BOVIN	KVPQL	292.6919++	2	292.692	KVPQL	8.84	8.69	9.04	3317507584	-1.2	0.9915	ALIGNED	8.83	8.69	9.01	3628180480	-1.7	0.9923	TRUE	8.93	8.81	9.06	15307055	-1.6	0.9586	ALIGNED	8.95	8.79	9.1	49008472	0.1	0.9917	TRUE	9.05	8.88	9.23	33705808	-0.2	0.985	TRUE	9.03	8.86	9.21	66602112	-1.1	0.9857	ALIGNED
sp|P02662|CASA1_BOVIN	KVPQLEIVPN	569.3293++	2	569.329	KVPQ[+1]LEIVPN	13.84	13.74	14.01	3936219	-0.4	0.9507	ALIGNED	13.84	13.8	13.89	564771	-2	0.9397	ALIGNED	13.9	13.86	13.95	236448	-2.8	0.8924	ALIGNED	13.8	13.69	14	6808293	3.1	0.9406	ALIGNED	13.8	13.71	14	10019017	1.4	0.9959	TRUE	13.77	13.68	13.97	3269785	0.1	0.9642	ALIGNED
sp|P02662|CASA1_BOVIN	KVPQLEIV	463.2895++	2	463.289	KVPQLEIV	14.08	13.98	14.17	32755888	-0.6	0.9723	TRUE	14.07	13.97	14.13	28322166	-1	0.9945	ALIGNED
sp|P02662|CASA1_BOVIN	KVPQ	471.2926+	1	471.293	KVPQ	1.6	1.46	1.79	2104824320	-0.3	0.9871	TRUE	1.59	1.46	1.77	2127914752	-0.6	0.9882	TRUE	1.57	1.4	1.8	1552945024	-0.4	0.9861	TRUE	1.58	1.29	1.81	14930448	0.6	0.9796	TRUE	1.65	1.5	1.9	9777303	0.2	0.9776	TRUE	1.67	1.52	1.95	863260	0.6	0.9634	ALIGNED
sp|P02662|CASA1_BOVIN	KVPQ	236.1499++	2	236.15	KVPQ	1.6	1.46	1.79	806658880	-0.6	0.9795	TRUE	1.56	1.46	1.77	797383040	-0.9	0.9786	TRUE	1.57	1.4	1.8	485938976	-0.6	0.9766	TRUE	1.6	1.29	1.81	10076961	0.5	0.9756	TRUE	1.68	1.5	1.9	6258780	0.4	0.9634	TRUE	1.7	1.52	1.95	1210056	0.1	0.9597	ALIGNED
sp|P02662|CASA1_BOVIN	KVPQ	472.2766+	1	472.277	KVPQ[+1]	2.33	2.23	2.49	15121188	-0.4	0.8745	ALIGNED	2.31	2.21	2.44	4451628	-0.4	0.8535	ALIGNED								2.42	2.33	2.54	1676424	-0.7	0.9678	TRUE	2.48	2.42	2.62	2262939	-1.1	0.9667	TRUE	2.53	2.46	2.62	214572	0.8	0.946	ALIGNED
sp|P02662|CASA1_BOVIN	KVPQL	585.3606+	1	585.361	KVPQ[+1]L	9.37	9.25	9.49	73046536	-0.2	0.9844	TRUE	9.37	9.26	9.48	27052732	-0.4	0.9828	ALIGNED								9.39	9.27	9.54	3321168	0.1	0.9839	TRUE	9.47	9.36	9.65	2287375	0.7	0.9868	TRUE	9.44	9.3	9.63	1756648	-1.4	0.9528	ALIGNED
sp|P02662|CASA1_BOVIN	KVPQL	293.1840++	2	293.184	KVPQ[+1]L	9.37	9.25	9.49	78382264	-0.8	0.9806	TRUE	9.37	9.26	9.48	28882086	-1.4	0.9594	ALIGNED								9.39	9.27	9.54	11301775	-0.3	0.9778	TRUE	9.47	9.36	9.65	7100634	1	0.9815	TRUE	9.44	9.3	9.63	5640307	-0.7	0.9849	ALIGNED
sp|P02662|CASA1_BOVIN	VPQLEIVPN	1008.5724+	1	1008.57	VPQLEIVPN	14.56	14.39	14.68	31738648	0.1	0.9883	TRUE	14.52	14.41	14.65	28623284	0.1	0.9959	TRUE	14.47	14.33	14.57	10514545	0.8	0.976	TRUE	14.49	14.39	14.64	2465600	2.2	0.9924	ALIGNED	14.44	14.36	14.61	7236785	4.1	0.9947	TRUE	14.4	14.32	14.55	9409281	1.6	0.9897	ALIGNED
sp|P02662|CASA1_BOVIN	VPQLEIVPN	504.7898++	2	504.79	VPQLEIVPN	14.56	14.39	14.68	67005128	-0.7	0.9876	TRUE	14.52	14.41	14.65	58460068	-1.2	0.9892	TRUE	14.47	14.33	14.57	15587567	-2.2	0.9806	TRUE	14.49	14.39	14.64	14314988	1.3	0.9929	ALIGNED	14.44	14.36	14.61	30229540	3.2	0.9965	TRUE	14.4	14.32	14.55	36015356	1	0.9954	ALIGNED
sp|P02662|CASA1_BOVIN	VPQLE	586.3083+	1	586.308	VPQ[+1]LE	9.12	9.05	9.22	4303143	0.8	0.9714	ALIGNED	9.11	9.04	9.13	2018530	-1.6	0.8594	ALIGNED								9.15	9.06	9.35	3461769	4.3	0.8842	ALIGNED	9.16	9.08	9.33	7689947	2.7	0.9263	TRUE
sp|P02662|CASA1_BOVIN	VPQLEIVPN	505.2819++	2	505.282	VPQ[+1]LEIVPN																						14.94	14.83	15.19	3217431	2.5	0.9864	TRUE	14.9	14.79	15.14	9192340	3.7	0.9893	TRUE	14.86	14.76	14.94	3162272	3.8	0.9938	ALIGNED
sp|P02662|CASA1_BOVIN	QLEIVPN	406.7293++	2	406.729	QLEIVPN	12.34	12.2	12.4	2080413	-0.8	0.8181	ALIGNED	12.33	12.2	12.38	2524807	-1.2	0.8191	ALIGNED								12.27	12.2	12.36	610131	0.9	0.9662	ALIGNED	12.27	12.19	12.38	3657967	1.5	0.9821	TRUE	12.24	12.15	12.37	4850653	0.6	0.959	TRUE
sp|P02662|CASA1_BOVIN	LEIVPNSAEERL	725.3529++	2	725.353	LEIVPNS[+80]AEERL																						14.61	14.52	14.72	1346379	1.1	0.9921	ALIGNED	14.55	14.48	14.64	3442964	0.5	0.9912	TRUE
sp|P02662|CASA1_BOVIN	LEIVPNSAEE	590.7603++	2	590.76	LEIVPNS[+80]AEE	11.85	11.79	11.95	10204493	0.3	0.9773	ALIGNED	11.85	11.77	11.94	18794680	-0.7	0.9812	ALIGNED	11.79	11.72	11.91	22161842	0.2	0.9824	TRUE	11.8	11.73	11.89	169933	0.8	0.9084	ALIGNED	11.74	11.65	11.83	1778668	0	0.9796	ALIGNED	11.7	11.65	11.81	679694	0.5	0.9656	ALIGNED
sp|P02662|CASA1_BOVIN	LEIVPNSAE	526.2390++	2	526.239	LEIVPNS[+80]AE																						11.6	11.53	11.71	553520	0.8	0.9778	ALIGNED	11.55	11.47	11.64	1841627	0.6	0.9894	TRUE	11.53	11.47	11.56	82234	-2.3	0.9434	ALIGNED
sp|P02662|CASA1_BOVIN	LEIVPNSAEER	668.8109++	2	668.811	LEIVPNS[+80]AEER	11	10.91	11.1	237191856	-0.3	0.9899	TRUE	10.99	10.91	11.09	237011488	-0.4	0.9954	TRUE	10.96	10.87	11.09	64022052	0	0.9922	TRUE	10.99	10.91	11.07	468916	0.3	0.9889	ALIGNED	10.95	10.87	11.05	2326365	1.8	0.9937	ALIGNED	10.93	10.84	11	921198	-1.1	0.9798	ALIGNED
sp|P02662|CASA1_BOVIN	LEIVPN	684.3927+	1	684.393	LEIVPN	11.73	11.64	11.84	558192192	-1.3	0.991	TRUE	11.7	11.63	11.83	530367840	-1.7	0.9922	TRUE	11.7	11.6	11.81	840183296	-1.2	0.9917	TRUE	11.69	11.6	11.82	9162409	0.4	0.988	TRUE	11.68	11.59	11.81	24699232	-0.5	0.9902	TRUE	11.66	11.57	11.79	29063780	-0.5	0.9889	TRUE
sp|P02662|CASA1_BOVIN	LEIVPN	342.7000++	2	342.7	LEIVPN	11.73	11.64	11.84	215772080	-0.9	0.9856	TRUE	11.7	11.63	11.83	215466928	-1.3	0.9917	TRUE	11.68	11.6	11.81	380854752	-0.7	0.9892	TRUE	11.69	11.6	11.82	10155668	0.4	0.986	TRUE	11.68	11.59	11.81	21578564	-0.5	0.9863	TRUE	11.66	11.57	11.79	24936220	-0.6	0.9873	TRUE
sp|P02662|CASA1_BOVIN	LEI	374.2286+	1	374.229	LEI	11.37	11.27	11.51	245645760	-0.5	0.9772	ALIGNED	11.34	11.24	11.5	212438016	-0.8	0.9786	TRUE	11.37	11.27	11.52	118065016	-0.6	0.9759	ALIGNED
sp|P02662|CASA1_BOVIN	EIVPNSA	809.3441+	1	809.344	EIVPNS[+80]A	8.17	8.08	8.26	39334328	-0.4	0.9759	TRUE	8.18	8.07	8.26	42179592	-0.8	0.9624	ALIGNED	8.14	8.08	8.22	6254201	-0.2	0.9467	ALIGNED
sp|P02662|CASA1_BOVIN	EIVPNSAEERLHSM	564.5868+++	3	564.587	EIVPNS[+80]AEERLHSM																																				12.43	12.35	12.59	14044756	-0.8	0.9851	TRUE
sp|P02662|CASA1_BOVIN	EIVPNSAEER	1223.5304+	1	1223.53	EIVPNS[+80]AEER	7.65	7.57	7.81	205795360	0.8	0.9924	TRUE	7.64	7.55	7.81	189172656	0.7	0.9921	TRUE	7.64	7.56	7.8	41996160	1	0.9964	TRUE
sp|P02662|CASA1_BOVIN	EIVPNSAEER	612.2688++	2	612.269	EIVPNS[+80]AEER	7.65	7.57	7.81	3069110784	0.3	0.9962	TRUE	7.65	7.55	7.81	2823910400	0.2	0.996	TRUE	7.64	7.56	7.8	643088384	0.1	0.9961	TRUE	7.68	7.59	7.86	3228549	0.7	0.994	TRUE	7.66	7.57	7.82	10222923	-0.8	0.9919	TRUE	7.65	7.58	7.82	5779159	-1.1	0.9927	TRUE
sp|P02662|CASA1_BOVIN	EIVPNSAEER	408.5150+++	3	408.515	EIVPNS[+80]AEER	7.65	7.57	7.81	49804716	-0.2	0.9938	TRUE	7.65	7.55	7.81	52127636	-0.2	0.9867	TRUE	7.63	7.56	7.8	9894782	-0.1	0.993	TRUE	7.68	7.59	7.86	90886	-1.1	0.8931	TRUE	7.66	7.57	7.82	251394	-1.9	0.9538	TRUE	7.65	7.58	7.82	144693	-1.7	0.8277	TRUE
sp|P02662|CASA1_BOVIN	EIVPNSAEERL	668.8109++	2	668.811	EIVPNS[+80]AEERL	12.13	12.03	12.39	103372040	0.8	0.9976	TRUE	12.12	12.01	12.32	88539136	0.3	0.9912	TRUE								12.07	11.95	12.36	7051241	0.3	0.9964	TRUE	12.04	11.93	12.29	12652944	-0.3	0.9925	TRUE	12.02	11.91	12.28	9113979	-0.9	0.9834	TRUE
sp|P02662|CASA1_BOVIN	EIVPNSAE	469.6970++	2	469.697	EIVPNS[+80]AE																						7.89	7.8	8.02	781572	0.7	0.9831	ALIGNED	7.86	7.77	7.96	2149840	0.2	0.9899	TRUE	7.86	7.78	8.03	2865809	0	0.9735	ALIGNED
sp|P02662|CASA1_BOVIN	EIVPNSAEE	534.2183++	2	534.218	EIVPNS[+80]AEE	8.32	8.23	8.44	57237852	-0.1	0.9812	TRUE	8.32	8.23	8.47	106199776	-0.5	0.9919	TRUE	8.3	8.2	8.44	101121200	-0.4	0.9952	TRUE	8.28	8.21	8.39	690333	0.6	0.9818	ALIGNED	8.25	8.16	8.41	6325655	0.6	0.9875	ALIGNED	8.25	8.15	8.38	7964138	-0.1	0.9868	ALIGNED
sp|P02662|CASA1_BOVIN	EIVPNSAEER	612.7608++	2	612.761	EIVPN[+1]S[+80]AEER	8.06	7.96	8.14	59406900	-0.6	0.9878	TRUE	8.06	7.96	8.14	49543300	-1	0.9939	TRUE	8.07	7.99	8.14	10986394	0	0.9658	ALIGNED	8.1	8	8.16	248885	-0.9	0.9342	ALIGNED	8.08	7.99	8.14	340050	-0.3	0.9519	ALIGNED
sp|P02662|CASA1_BOVIN	EIVPNSAEERLH	491.8960+++	3	491.896	EIVPNS[+80]AEERLH																						9.89	9.83	10.12	1468349	0.6	0.9928	ALIGNED	9.88	9.8	10.08	2683858	0.3	0.981	ALIGNED	9.87	9.78	10.11	10269255	0.5	0.9921	TRUE
sp|P02662|CASA1_BOVIN	IVPNSAEER	1094.4878+	1	1094.49	IVPNS[+80]AEER	5.91	5.77	6.32	73274504	-0.2	0.9873	TRUE	5.94	5.66	6.28	60633656	-0.6	0.9845	TRUE	5.92	5.65	6.26	9933110	0	0.9537	TRUE								6.06	5.76	6.16	284876	0.6	0.8936	TRUE	5.98	5.77	6.29	370886	0.7	0.9345	TRUE
sp|P02662|CASA1_BOVIN	IVPNSAEER	547.7475++	2	547.748	IVPNS[+80]AEER	5.91	5.77	6.32	877568064	-0.3	0.9953	TRUE	5.91	5.66	6.28	723493568	-0.7	0.9964	TRUE	5.9	5.65	6.26	139627952	-0.1	0.9904	TRUE	5.93	5.75	6.16	7261190	-0.8	0.995	TRUE	5.93	5.76	6.16	9749563	-0.3	0.9866	TRUE	5.95	5.77	6.29	21964560	-0.2	0.9912	TRUE
sp|P02662|CASA1_BOVIN	IVPNSAEERL	604.2896++	2	604.29	IVPNS[+80]AEERL	10.74	10.56	11.02	28726792	-0.5	0.9945	ALIGNED	10.69	10.55	11.02	22494036	-0.9	0.9928	ALIGNED								10.72	10.5	11.1	11892184	1.2	0.9912	TRUE	10.69	10.47	11.08	11710716	1	0.9943	TRUE	10.65	10.4	10.99	4392956	1.7	0.9804	ALIGNED
sp|P02662|CASA1_BOVIN	VPN	329.1819+	1	329.182	VPN	1.51	1.19	1.72	30034622	-1.1	0.9833	ALIGNED	1.49	1.24	1.72	29750060	-1.2	0.9893	ALIGNED	1.5	1.4	1.73	18183238	-1	0.9866	ALIGNED	1.52	1.32	2.2	10530849	0	0.9786	TRUE	1.55	1.27	2.25	17027526	-0.4	0.9866	TRUE	1.55	1.41	1.75	4531758	-0.3	0.9823	ALIGNED
sp|P02662|CASA1_BOVIN	VPNSAEERL	547.7475++	2	547.748	VPNS[+80]AEERL																						8.69	8.56	9.07	14821025	0.4	0.9894	TRUE	8.69	8.57	9.09	15779655	-0.1	0.9918	TRUE	8.72	8.57	9.04	1296584	0.3	0.9594	ALIGNED
sp|P02662|CASA1_BOVIN	VPNSAEER	491.2055++	2	491.205	VPNS[+80]AEER	3.5	3.4	3.6	8179697	0.4	0.9729	ALIGNED	3.47	3.4	3.63	4326671	0	0.8904	ALIGNED								3.51	3.38	3.99	4058415	0	0.9424	TRUE	3.55	3.41	4	8227603	-0.6	0.9534	TRUE	3.55	3.44	4.03	3079065	0.2	0.9844	ALIGNED
sp|P02662|CASA1_BOVIN	NSAEERL	449.6869++	2	449.687	NS[+80]AEERL																						6.88	6.82	7.03	1103306	0.3	0.9826	ALIGNED	6.91	6.82	7.05	6124499	-0.5	0.9882	TRUE	6.91	6.85	7	319403	-1.3	0.9546	ALIGNED
sp|P02662|CASA1_BOVIN	NSAEE	629.1814+	1	629.181	NS[+80]AEE																						0.87	0.82	1.03	269250	-0.9	0.8613	ALIGNED	0.91	0.85	1	4860060	-1.2	0.9857	TRUE
sp|P02662|CASA1_BOVIN	SAEER	671.2396+	1	671.24	S[+80]AEER	0.8	0.76	0.87	314346624	-1.3	0.9909	TRUE	0.8	0.74	0.87	294851168	-1.6	0.9923	TRUE	0.8	0.76	0.87	81979872	-1.5	0.9904	TRUE	0.8	0.74	0.89	24019580	-1.5	0.9887	TRUE	0.84	0.8	0.9	51648232	-2	0.991	TRUE	0.85	0.8	0.92	16681164	-1.9	0.9841	TRUE
sp|P02662|CASA1_BOVIN	SAEER	336.1234++	2	336.123	S[+80]AEER	0.8	0.76	0.87	103584776	-2.1	0.9931	TRUE	0.8	0.74	0.87	99534240	-2.3	0.9861	TRUE	0.8	0.76	0.87	32968112	-2.1	0.9716	TRUE	0.8	0.74	0.89	36718412	-2	0.9908	TRUE	0.84	0.8	0.9	37407392	-2.5	0.9879	TRUE	0.85	0.8	0.92	17839686	-2.5	0.9845	TRUE
sp|P02662|CASA1_BOVIN	SAEERLHS	504.7109++	2	504.711	S[+80]AEERLHS
sp|P02662|CASA1_BOVIN	SAEERLHSM	570.2312++	2	570.231	S[+80]AEERLHSM																						7.58	7.49	7.7	2861401	0.9	0.9882	TRUE	7.6	7.53	7.75	5288867	-0.7	0.993	TRUE	7.59	7.52	7.77	110859248	-1.5	0.9899	TRUE
sp|P02662|CASA1_BOVIN	SAEERL	784.3237+	1	784.324	S[+80]AEERL	6.49	6.41	6.61	11181647	0.7	0.9748	ALIGNED	6.48	6.41	6.58	8416364	0	0.9729	ALIGNED								6.51	6.43	6.63	19446094	-0.3	0.9888	TRUE	6.54	6.46	6.72	26703096	-0.2	0.987	TRUE	6.55	6.47	6.73	10070398	-0.2	0.9842	TRUE
sp|P02662|CASA1_BOVIN	SAEERL	392.6655++	2	392.665	S[+80]AEERL	6.49	6.41	6.61	19478526	-0.8	0.9795	ALIGNED	6.48	6.41	6.58	14445488	-1.9	0.9755	ALIGNED								6.51	6.43	6.63	83759280	-0.5	0.995	TRUE	6.54	6.46	6.72	91101920	-0.4	0.9942	TRUE	6.56	6.47	6.73	47193764	-0.7	0.9934	TRUE
sp|P02662|CASA1_BOVIN	SAEERL	352.6823++	2	352.682	SAEERL	5.68	5.62	5.81	3444797	0	0.932	ALIGNED	5.67	5.6	5.79	3054056	-0.3	0.9305	ALIGNED								5.7	5.63	5.81	4900095	-0.2	0.9798	TRUE	5.77	5.7	5.93	10719882	-0.2	0.9794	TRUE	5.78	5.69	5.93	2131449	-1.8	0.9732	TRUE
sp|P02662|CASA1_BOVIN	SAEERLH	461.1949++	2	461.195	S[+80]AEERLH																						4.01	3.94	4.12	59803280	-0.1	0.9933	TRUE	4.04	3.96	4.2	68005512	-1	0.9939	TRUE	4.04	3.98	4.19	65539120	-1.4	0.9923	TRUE
sp|P02662|CASA1_BOVIN	SAEERLH	307.7990+++	3	307.799	S[+80]AEERLH																						4.01	3.94	4.12	13835023	-0.6	0.9917	TRUE	4.04	3.96	4.2	14762186	-1.1	0.9909	TRUE	4.05	3.98	4.19	15764443	-1.6	0.9869	TRUE
sp|P02662|CASA1_BOVIN	SAEER	296.1403++	2	296.14	SAEER								0.7	0.66	0.76	14888564	-1.8	0.9791	TRUE
sp|P02662|CASA1_BOVIN	AEERLH	377.6958++	2	377.696	AEERLH																						2.73	2.64	2.88	3612942	0.5	0.9802	TRUE	2.81	2.67	2.96	1813514	-0.3	0.9651	ALIGNED	2.81	2.72	2.99	2134538	0.2	0.9736	ALIGNED
sp|P02662|CASA1_BOVIN	AEER	504.2413+	1	504.241	AEER								0.7	0.6	0.74	5929650	-2.1	0.954	ALIGNED								0.8	0.71	0.87	6214524	-1.2	0.9703	ALIGNED	0.74	0.69	0.79	8580664	-1.2	0.9862	TRUE	0.85	0.73	0.91	4152264	-1.7	0.9659	ALIGNED
sp|P02662|CASA1_BOVIN	AEER	252.6243++	2	252.624	AEER																													0.74	0.69	0.79	5483869	-1.2	0.9483	TRUE	0.78	0.73	0.91	1148486	-0.1	0.9466	ALIGNED
sp|P02662|CASA1_BOVIN	EER	433.2041+	1	433.204	EER	0.57	0.53	0.67	38422812	-2	0.9703	ALIGNED	0.57	0.54	0.66	32364070	-2.1	0.9722	ALIGNED	0.8	0.69	0.86	12524514	-2.3	0.9597	ALIGNED	0.8	0.74	0.89	8106003	-1.3	0.9839	TRUE								0.85	0.78	1.05	5151574	-1.6	0.9586	ALIGNED
sp|P02662|CASA1_BOVIN	RLHSM	322.1709++	2	322.171	RLHSM																																				3.41	3.34	3.59	10113412	-1.5	0.9414	TRUE
sp|P02662|CASA1_BOVIN	LHSMK	615.3283+	1	615.328	LHSMK	2.01	1.95	2.11	16471625	-0.8	0.9414	TRUE	1.97	1.94	2.08	2383526	-1.1	0.9473	ALIGNED	2.01	1.96	2.13	1635417	-1.2	0.8386	ALIGNED
sp|P02662|CASA1_BOVIN	LHSM	244.1203++	2	244.12	LHSM	4.03	3.9	4.24	2472606208	-0.3	0.9627	ALIGNED	4.01	3.93	4.12	2268843264	-0.5	0.9653	TRUE	4.06	4	4.16	32734458	-0.1	0.954	TRUE								4.2	4.12	4.33	811546	-0.2	0.9017	ALIGNED	4.21	4.13	4.39	9355560	-1.6	0.953	ALIGNED
sp|P02662|CASA1_BOVIN	LHSM	503.2282+	1	503.228	LHSM[+16]	0.9	0.86	0.99	115416896	-1.7	0.9492	ALIGNED	0.89	0.85	0.96	106627104	-1.7	0.9678	TRUE
sp|P02662|CASA1_BOVIN	HSM	374.1493+	1	374.149	HSM	0.96	0.91	1.04	1416944512	-1	0.9823	TRUE	0.95	0.91	1.02	1432134912	-1.3	0.9815	TRUE	0.94	0.91	1.03	650371840	-1.3	0.9763	TRUE
sp|P02662|CASA1_BOVIN	SMKEGIHA	291.4813+++	3	291.481	SMKEGIHA								5.71	5.62	5.82	680290	-0.2	0.9737	ALIGNED								5.62	5.53	5.79	2000919	0.2	0.954	ALIGNED	5.71	5.64	5.84	2343355	0	0.9704	TRUE
sp|P02662|CASA1_BOVIN	MKEGIH	357.6838++	2	357.684	MKEGIH	3.6	3.54	3.7	18674958	-0.6	0.9374	TRUE	3.59	3.52	3.68	19651172	-1	0.9394	TRUE	3.61	3.5	3.72	13952651	-0.6	0.9356	ALIGNED								3.74	3.69	3.81	595347	-1.5	0.9172	ALIGNED	3.75	3.68	3.85	592234	-0.6	0.9102	ALIGNED
sp|P02662|CASA1_BOVIN	KEGIH	583.3198+	1	583.32	KEGIH	1.07	0.98	1.13	23426208	0.1	0.9837	TRUE	1.05	0.97	1.14	23683562	-0.6	0.9637	ALIGNED	1.06	0.97	1.13	59818776	-0.4	0.985	TRUE															1.17	1.12	1.28	2477152	-0.7	0.985	TRUE
sp|P02662|CASA1_BOVIN	KEGIH	292.1636++	2	292.164	KEGIH	1.05	0.98	1.13	44647304	-0.9	0.9733	TRUE	1.05	0.97	1.14	43469144	-1	0.9614	ALIGNED	1.06	0.97	1.13	106409088	-1.1	0.9776	TRUE															1.19	1.12	1.28	21561052	-2.4	0.984	TRUE
sp|P02662|CASA1_BOVIN	KEGIHAQ	392.2034++	2	392.203	KEGIHAQ[+1]	2.72	2.5	2.89	7832905	-0.7	0.9653	ALIGNED	2.72	2.53	2.86	5523945	-1	0.9571	ALIGNED	2.73	2.56	2.89	6390431	0	0.9253	ALIGNED	2.99	2.92	3.12	241585	0.6	0.9002	ALIGNED								2.89	2.81	3.03	2690539	-0.4	0.9829	TRUE
sp|P02662|CASA1_BOVIN	KEGIHAQ	782.4155+	1	782.416	KEGIHAQ	2.01	1.95	2.17	45097492	-1	0.9872	TRUE	2.01	1.93	2.15	40247680	-0.9	0.9959	TRUE	2.04	1.95	2.19	26385156	-0.8	0.986	TRUE								2.24	2.15	2.37	82986	-1.1	0.9466	TRUE	2.24	2.17	2.48	174431	0.1	0.9931	TRUE
sp|P02662|CASA1_BOVIN	KEGIHAQ	391.7114++	2	391.711	KEGIHAQ	2.01	1.95	2.17	370815776	-2.9	0.9886	TRUE	1.99	1.93	2.15	307645376	-3.5	0.9897	TRUE	2.01	1.95	2.19	204310976	-3.5	0.9819	TRUE	2.23	2.07	2.34	1754613	0.4	0.9867	ALIGNED	2.23	2.15	2.37	3227367	-0.6	0.9918	TRUE	2.24	2.17	2.48	21164160	-0.9	0.9932	TRUE
sp|P02662|CASA1_BOVIN	KEGIHA	654.3570+	1	654.357	KEGIHA	2.6	2.5	2.84	78558432	0.2	0.9859	TRUE	2.57	2.39	2.78	77588456	0	0.9866	TRUE	2.58	2.41	2.78	301868032	0	0.9912	TRUE	2.97	2.83	3.08	485722	0.8	0.9779	ALIGNED	3.1	2.81	3.22	1671707	-0.4	0.9714	TRUE
sp|P02662|CASA1_BOVIN	KEGIHA	327.6821++	2	327.682	KEGIHA	2.61	2.5	2.84	66938356	-0.2	0.9836	TRUE	2.58	2.39	2.78	56910716	0.1	0.9793	TRUE	2.6	2.41	2.78	177943728	-0.3	0.9884	TRUE	2.97	2.83	3.08	7329355	0.2	0.988	ALIGNED	3.08	2.81	3.22	8063862	0	0.9629	TRUE	3.1	3.03	3.3	546159	-0.9	0.9777	ALIGNED
sp|P02662|CASA1_BOVIN	KEGIHAQQ	455.7407++	2	455.741	KEGIHAQQ	2.34	2.25	2.5	275769280	-0.8	0.9901	ALIGNED	2.33	2.22	2.5	223523920	-1	0.9902	ALIGNED	2.39	2.23	2.51	95857520	-0.9	0.9941	TRUE															2.68	2.45	2.82	1269185	0.6	0.9878	ALIGNED
sp|P02662|CASA1_BOVIN	KEGIHAQQ	304.1629+++	3	304.163	KEGIHAQQ	2.34	2.25	2.5	198044480	-0.9	0.9938	ALIGNED	2.33	2.22	2.5	125612544	-1.4	0.9735	ALIGNED	2.4	2.23	2.51	26298616	-1.4	0.9756	TRUE															2.7	2.45	2.82	153861	-1.1	0.9366	ALIGNED
sp|P02662|CASA1_BOVIN	EGIHAQQ	782.3791+	1	782.379	EGIHAQQ	3.74	3.68	3.84	360083872	-0.3	0.9905	TRUE	3.73	3.66	3.83	710172800	-0.9	0.992	TRUE	3.75	3.68	3.85	348263776	-1	0.9912	TRUE
sp|P02662|CASA1_BOVIN	EGIHAQ	327.6639++	2	327.664	EGIHAQ	3.34	3.27	3.52	3662225152	-2	0.9926	TRUE	3.33	3.25	3.52	3551885312	-2.2	0.992	TRUE	3.38	3.31	3.53	1307152768	-2	0.9892	TRUE	3.47	3.41	3.58	230043	1.9	0.9632	ALIGNED	3.53	3.48	3.71	1192516	0.9	0.9788	ALIGNED	3.55	3.47	3.69	9054668	-1.7	0.9863	TRUE
sp|P02662|CASA1_BOVIN	EGIH	455.2249+	1	455.225	EGIH	1.96	1.88	2.06	364474976	-0.7	0.979	TRUE	1.95	1.86	2.05	398251840	-0.9	0.9843	TRUE	1.98	1.88	2.08	418245792	-0.4	0.9813	ALIGNED								2.12	2.04	2.28	3458484	-2.6	0.852	ALIGNED	2.12	2.05	2.28	2439637	0.5	0.9714	ALIGNED
sp|P02662|CASA1_BOVIN	EGIHA	263.6346++	2	263.635	EGIHA	4.93	4.84	4.98	15770981	-0.5	0.9562	TRUE	4.93	4.93	5.01	2176791	-1.9	0.8261	ALIGNED	4.52	4.43	4.71	2355663616	-1.1	0.9847	ALIGNED	5	4.75	5.27	720846	0.9	0.9784	ALIGNED	4.74	4.65	4.88	7880394	-1.1	0.9054	TRUE	4.76	4.68	4.87	665852	-1.6	0.8717	ALIGNED
sp|P02662|CASA1_BOVIN	GIHAQQK	391.2194++	2	391.219	GIHAQQK	2.34	2.23	2.43	46667668	-0.9	0.9664	TRUE	2.33	2.19	2.42	31828866	-0.9	0.9789	TRUE
sp|P02662|CASA1_BOVIN	GIHAQQ	653.3365+	1	653.337	GIHAQQ	3.74	3.66	3.82	12145952	2.3	0.9506	ALIGNED	3.73	3.63	3.82	22661196	1.3	0.9681	TRUE	3.75	3.66	3.85	12837249	2.3	0.9404	ALIGNED
sp|P02662|CASA1_BOVIN	GIHAQ	263.1426++	2	263.143	GIHAQ	2.01	1.94	2.15	42774364	-0.8	0.9698	ALIGNED	1.98	1.91	2.08	45104496	-0.7	0.9775	TRUE	2.01	1.91	2.19	9867142	-0.5	0.9552	ALIGNED															2.19	2.11	2.33	4695900	-0.1	0.9813	ALIGNED
sp|P02662|CASA1_BOVIN	IHAQ	468.2565+	1	468.257	IHAQ	3.35	3.26	3.52	93767840	0.1	0.9848	TRUE	3.33	3.26	3.5	86430760	-0.3	0.9852	ALIGNED	3.38	3.31	3.52	31548424	0.8	0.9745	ALIGNED															3.55	3.47	3.64	205093	0	0.8836	ALIGNED
sp|P02662|CASA1_BOVIN	IHAQQ	596.3151+	1	596.315	IHAQQ	1.69	1.41	1.76	11505908	-0.5	0.9754	TRUE	1.67	1.44	1.76	14383615	-0.6	0.9797	TRUE	1.68	1.52	1.77	1630164	-0.8	0.9353	ALIGNED
sp|P02662|CASA1_BOVIN	IHAQQ	298.6612++	2	298.661	IHAQQ	1.69	1.41	1.76	23918798	-0.4	0.9834	TRUE	1.67	1.44	1.76	27975754	-0.7	0.9784	TRUE	1.68	1.52	1.77	3794411	-0.8	0.9586	ALIGNED								1.82	1.67	1.96	155824	-1.1	0.8504	ALIGNED	1.83	1.74	1.99	2435742	0	0.9812	ALIGNED
sp|P02662|CASA1_BOVIN	HAQ	355.1724+	1	355.172	HAQ	3.35	3.28	3.52	107500712	-1.2	0.9442	TRUE	3.33	3.26	3.51	103452064	-1.6	0.9268	ALIGNED	3.38	3.28	3.53	45090768	-1.4	0.8357	ALIGNED															3.55	3.49	3.73	366484	-3.6	0.9656	ALIGNED
sp|P02662|CASA1_BOVIN	AQQKEPMIGV	550.7921++	2	550.792	AQQKEPMIGV	10.9	10.8	11.07	168144304	-0.2	0.9854	TRUE	10.91	10.8	11.05	95395968	-0.5	0.9798	TRUE	10.9	10.79	11.09	41985136	0.2	0.9811	TRUE								10.95	10.81	11.08	963510	-0.4	0.9288	ALIGNED	10.93	10.84	11.03	1428210	-0.5	0.9519	ALIGNED
sp|P02662|CASA1_BOVIN	AQQKEPMIG	501.2579++	2	501.258	AQQKEPMIG	7.86	7.74	8.02	27282216	0	0.9775	TRUE	7.84	7.74	8	14241136	-0.3	0.9408	ALIGNED	7.84	7.77	7.98	5466278	-1.7	0.9437	ALIGNED								7.96	7.84	8.05	394070	-2	0.9682	ALIGNED	7.91	7.8	8.11	1527326	-1.6	0.9872	ALIGNED
sp|P02662|CASA1_BOVIN	AQQKEPM	831.4029+	1	831.403	AQQKEPM	4.03	3.96	4.16	20109920	0.2	0.99	TRUE	4.03	3.96	4.14	13317096	0.8	0.968	TRUE	4.03	3.96	4.19	11242453	1.3	0.9282	TRUE															4.21	4.14	4.36	833648	-2.3	0.9707	TRUE
sp|P02662|CASA1_BOVIN	AQQKEPM	416.2051++	2	416.205	AQQKEPM	4.03	3.96	4.16	101685312	-0.6	0.9629	TRUE	4.03	3.96	4.14	56759348	-0.8	0.9548	TRUE	4.03	3.96	4.19	53434352	-0.7	0.9594	TRUE	4.15	4.06	4.24	322539	1.2	0.9319	ALIGNED	4.19	4.13	4.31	1748439	-1.1	0.935	ALIGNED	4.21	4.14	4.36	13140838	-2.3	0.9693	TRUE
sp|P02662|CASA1_BOVIN	QQKEPMIGVN	572.2950++	2	572.295	QQKEPMIGVN	9.3	9.23	9.48	114101168	0.9	0.9616	TRUE	9.28	9.14	9.47	98631232	0.4	0.9685	TRUE	9.28	9.15	9.51	50255076	2.5	0.9158	ALIGNED
sp|P02662|CASA1_BOVIN	QQKEPMIGV	515.2735++	2	515.274	QQKEPMIGV	10.89	10.79	11.03	279064352	-3	0.9218	TRUE	10.87	10.7	11.01	280460672	-3.3	0.8872	TRUE															10.93	10.84	11.07	397640	2.9	0.8654	ALIGNED	10.93	10.78	11	699978	-0.3	0.9937	ALIGNED
sp|P02662|CASA1_BOVIN	QKEPMIG	802.4128+	1	802.413	QKEPMIG	7.65	7.54	7.85	72252984	0.2	0.9934	TRUE	7.65	7.53	7.84	69520656	0.2	0.9848	TRUE	7.64	7.53	7.84	45635064	0.4	0.984	TRUE															7.76	7.62	7.87	1799959	4.7	0.8925	ALIGNED
sp|P02662|CASA1_BOVIN	QKEPMIG	401.7100++	2	401.71	QKEPMIG	7.64	7.54	7.85	351935296	0.2	0.971	TRUE	7.65	7.53	7.84	329046080	0.2	0.9722	TRUE	7.63	7.53	7.84	244714832	0.3	0.9705	TRUE	7.68	7.58	7.83	581924	0.4	0.9125	ALIGNED	7.72	7.58	7.87	3055833	-0.8	0.9478	ALIGNED	7.74	7.62	7.87	8554293	0.8	0.9344	ALIGNED
sp|P02662|CASA1_BOVIN	QKEPMIGVNQEL	693.3583++	2	693.358	QKEPMIGVNQEL	12.87	12.78	12.97	36305828	-0.4	0.9791	TRUE	12.85	12.75	12.95	36294056	-1.2	0.9869	ALIGNED								12.79	12.72	12.86	272368	2.8	0.9781	ALIGNED	12.8	12.71	12.91	972682	3.9	0.9795	ALIGNED	12.76	12.69	12.88	1857240	0.9	0.9807	ALIGNED
sp|P02662|CASA1_BOVIN	QKEPMIGVN	1015.5241+	1	1015.52	QKEPMIGVN	9.23	9.13	9.37	97597952	-0.2	0.9924	TRUE	9.23	9.12	9.36	89155440	-0.4	0.981	TRUE	9.22	9.13	9.38	71577952	0	0.9865	TRUE
sp|P02662|CASA1_BOVIN	QKEPMIGVN	508.2657++	2	508.266	QKEPMIGVN	9.24	9.13	9.37	672579008	0.3	0.983	TRUE	9.23	9.12	9.36	631442880	0	0.9788	TRUE	9.22	9.13	9.38	608902336	0.5	0.9824	TRUE	9.26	9.13	9.44	99071	0.8	0.851	ALIGNED	8.93	8.84	9.15	1444837	1.1	0.9766	ALIGNED	9.26	9.18	9.41	5337383	1.2	0.9805	ALIGNED
sp|P02662|CASA1_BOVIN	QKEPMIGV	901.4812+	1	901.481	QKEPMIGV	10.83	10.74	10.99	277047296	2	0.936	TRUE	10.82	10.72	10.97	274586432	2.3	0.9285	TRUE	10.82	10.71	10.98	201238416	0.7	0.9887	TRUE
sp|P02662|CASA1_BOVIN	QKEPMIGV	451.2442++	2	451.244	QKEPMIGV	10.83	10.74	10.99	1810285056	-0.2	0.9769	TRUE	10.82	10.72	10.97	1803993600	-0.5	0.9746	TRUE	10.82	10.71	10.98	1756639104	0	0.9813	TRUE	10.83	10.76	10.95	207234	0.6	0.8915	ALIGNED	10.9	10.74	11.02	1539227	0.2	0.9655	ALIGNED	10.87	10.75	10.99	3255904	-0.1	0.9707	ALIGNED
sp|P02662|CASA1_BOVIN	QKEPMIGVNQELA	728.8769++	2	728.877	QKEPMIGVNQELA	12.38	12.29	12.49	65233136	-0.1	0.9741	TRUE	12.36	12.25	12.45	60286756	-0.6	0.9689	TRUE	12.31	12.24	12.54	19401760	-1.3	0.9799	ALIGNED															12.27	12.2	12.54	350936	0.8	0.9567	ALIGNED
sp|P02662|CASA1_BOVIN	QKEPM	632.3072+	1	632.307	QKEPM	3.63	3.54	3.74	158349744	-0.2	0.9697	TRUE	3.6	3.53	3.72	166178976	-0.8	0.9637	TRUE	3.63	3.54	3.74	210772480	-0.5	0.9594	TRUE															3.76	3.68	3.89	873965	-0.5	0.9669	ALIGNED
sp|P02662|CASA1_BOVIN	KEPMIGVN	444.2364++	2	444.236	KEPMIGVN	9.1	8.98	9.35	70315040	-2.1	0.9123	ALIGNED	9.04	8.98	9.35	74578384	-2.2	0.9055	ALIGNED	9.11	8.99	9.37	91255512	-1.1	0.9135	ALIGNED								9.19	9.09	9.37	779358	0.7	0.9838	ALIGNED	9.15	8.99	9.41	7057524	0.3	0.9484	TRUE
sp|P02662|CASA1_BOVIN	KEPM	504.2486+	1	504.249	KEPM	2.86	2.62	3.06	34249260	-0.4	0.9513	ALIGNED	2.86	2.56	3.04	36765068	-0.8	0.9445	ALIGNED	2.83	2.57	2.96	34461360	-1.2	0.9378	TRUE	3.05	2.96	3.17	579694	0.3	0.9238	ALIGNED								3.16	3.05	3.34	2680128	-0.5	0.9348	ALIGNED
sp|P02662|CASA1_BOVIN	KEPMIGVNQE	572.7870++	2	572.787	KEPMIGVNQE																						9.19	9.11	9.33	76176	1.6	0.8985	ALIGNED	9.25	9.13	9.39	517550	2.6	0.9502	ALIGNED	9.2	9.1	9.34	5140027	1.1	0.9885	TRUE
sp|P02662|CASA1_BOVIN	KEPMIGV	387.2149++	2	387.215	KEPMIGV	10.77	10.51	10.96	146140880	-0.7	0.9548	TRUE	10.73	10.52	11.02	155319968	-1	0.9579	TRUE	10.74	10.5	10.99	157279376	-0.4	0.9532	TRUE	10.76	10.54	11	949965	1.1	0.9334	ALIGNED	10.83	10.65	11.02	2230853	0.4	0.9621	ALIGNED	10.79	10.67	10.99	2947267	0	0.959	ALIGNED
sp|P02662|CASA1_BOVIN	EPMIGVNQEL	565.2815++	2	565.282	EPMIGVNQEL	14.39	14.25	14.56	253524656	-0.4	0.9877	TRUE	14.37	14.22	14.55	273825376	-0.7	0.9877	ALIGNED	14.33	14.14	14.43	36770992	3	0.983	ALIGNED								14.28	14.01	14.51	802053	4.1	0.9466	ALIGNED	14.24	14.14	14.39	1861511	1.7	0.9886	ALIGNED
sp|P02662|CASA1_BOVIN	EPMIGVNQELA	600.8001++	2	600.8	EPMIGVNQELA	13.78	13.68	13.97	464914368	0.7	0.9908	TRUE	13.77	13.67	13.95	530323424	0.3	0.9946	TRUE	13.72	13.63	13.93	98968544	0.8	0.9893	TRUE
sp|P02662|CASA1_BOVIN	EPMIGVN	759.3706+	1	759.371	EPMIGVN	10.44	10.3	10.72	2545751040	-1.2	0.9762	TRUE	10.37	10.27	10.71	2774896128	-1.4	0.9805	TRUE	10.4	10.27	10.71	1371907072	-1.1	0.972	TRUE								10.48	10.38	10.62	233095	1.5	0.8764	ALIGNED	10.46	10.36	10.71	2835804	0.1	0.9733	ALIGNED
sp|P02662|CASA1_BOVIN	PMI	360.1952+	1	360.195	PMI	9.64	9.4	10.05	794775552	-0.5	0.9778	TRUE	9.6	9.39	10.02	980450368	-0.8	0.9807	TRUE	9.66	9.45	10.06	716161344	-0.7	0.9764	TRUE
sp|P02662|CASA1_BOVIN	PMIG	417.2166+	1	417.217	PMIG	7.94	7.85	8.07	78013328	-0.5	0.9642	TRUE	7.92	7.85	8.06	80638128	-1	0.9643	TRUE	7.94	7.86	8.06	73480048	-0.1	0.9615	TRUE								8.01	7.86	8.14	2886524	-0.1	0.9335	ALIGNED	8.01	7.75	8.25	1444538	0.5	0.8945	ALIGNED
sp|P02662|CASA1_BOVIN	PMIGVNQELA	536.2788++	2	536.279	PMIGVNQELA	13.58	13.5	13.66	31705496	1.2	0.9815	TRUE	13.57	13.49	13.64	30236072	0.5	0.9821	TRUE	13.51	13.35	13.58	10758409	0.9	0.9728	ALIGNED
sp|P02662|CASA1_BOVIN	PMIGV	516.2850+	1	516.285	PMIGV	12.16	12.06	12.27	303062432	0.2	0.959	TRUE	12.16	12.05	12.25	323429120	-0.2	0.9626	TRUE	12.11	12.02	12.24	311740608	0.5	0.9604	TRUE								12.13	12.05	12.19	1193305	0.1	0.9152	ALIGNED	12.49	12.05	12.61	1822408	1.5	0.8327	ALIGNED
sp|P02662|CASA1_BOVIN	MIGVN	533.2752+	1	533.275	MIGVN																						8.69	8.56	8.73	61265	-3.7	0.8236	ALIGNED	8.72	8.64	8.76	247374	2.6	0.9159	ALIGNED	8.69	8.58	8.9	2716043	1.5	0.9257	ALIGNED
sp|P02662|CASA1_BOVIN	IGV	288.1918+	1	288.192	IGV	7.34	7.25	7.48	1434266880	-0.9	0.9853	ALIGNED	7.32	7.25	7.47	1439078528	-1.6	0.9846	TRUE	7.34	7.25	7.49	1836534016	-1.2	0.985	TRUE	7.5	7.42	7.55	94099	0.6	0.9083	ALIGNED	7.56	7.36	7.63	420108	0.4	0.8301	ALIGNED
sp|P02662|CASA1_BOVIN	IGVNQE	659.3359+	1	659.336	IGVNQE	6.14	6.04	6.24	479532288	0.2	0.9503	TRUE	6.13	5.99	6.23	501335072	-0.4	0.8913	ALIGNED	6.14	6.04	6.24	380920864	-0.1	0.9532	TRUE															6.17	6.1	6.28	18013654	0.5	0.9934	TRUE
sp|P02662|CASA1_BOVIN	IGVNQELA	843.4571+	1	843.457	IGVNQELA	10.66	10.57	10.75	664230080	-0.2	0.9921	TRUE	10.63	10.56	10.73	786569600	-0.5	0.9934	TRUE	10.61	10.55	10.73	446398272	-0.1	0.9947	TRUE	10.64	10.58	10.69	40165	0.8	0.9087	ALIGNED	10.63	10.56	10.75	762976	0.4	0.955	ALIGNED	10.62	10.53	10.73	2431556	1.7	0.9859	ALIGNED
sp|P02662|CASA1_BOVIN	IGVNQELA	422.2322++	2	422.232	IGVNQELA	10.66	10.57	10.75	367057408	-0.3	0.9931	TRUE	10.63	10.56	10.73	439359872	-0.6	0.9947	TRUE	10.61	10.55	10.73	259134048	-0.2	0.9895	TRUE								10.63	10.56	10.75	801830	3.1	0.9707	ALIGNED	10.6	10.53	10.73	3168610	1.2	0.9783	ALIGNED
sp|P02662|CASA1_BOVIN	IGVNQ	531.2773+	1	531.277	IGVNQ[+1]															6.39	6.31	6.48	1572218	0.1	0.9247	ALIGNED	6.4	6.33	6.48	902670	1.6	0.9778	ALIGNED	6.41	6.28	6.52	16084304	1.4	0.951	TRUE	6.42	6.34	6.55	2073393	0.9	0.8979	ALIGNED
sp|P02662|CASA1_BOVIN	IGVNQEL	772.4199+	1	772.42	IGVNQEL	11.22	11.13	11.42	780488768	-1.3	0.9924	TRUE	11.22	11.15	11.35	849007744	-1.7	0.9903	TRUE	11.2	11.12	11.33	475618176	-1.3	0.9925	TRUE	11.22	11.13	11.31	2256310	1	0.9872	ALIGNED	11.21	11.12	11.34	17450680	-0.8	0.9887	TRUE	11.18	11.11	11.31	21563934	-2	0.9881	TRUE
sp|P02662|CASA1_BOVIN	IGVNQEL	386.7136++	2	386.714	IGVNQEL								11.22	11.15	11.35	195698192	-1.5	0.9837	TRUE	11.21	11.12	11.33	111346200	-1.1	0.987	TRUE	11.22	11.13	11.31	2174208	0.6	0.9824	ALIGNED	11.21	11.12	11.34	10625405	-0.9	0.9853	TRUE	11.18	11.11	11.31	10969474	-2	0.9927	TRUE
sp|P02662|CASA1_BOVIN	IGVNQ	530.2933+	1	530.293	IGVNQ	5.4	5.33	5.51	343463968	0.5	0.9883	TRUE	5.41	5.32	5.52	377351040	0	0.9883	TRUE	5.41	5.35	5.53	364414272	0.4	0.9872	TRUE	5.42	5.35	5.53	2388891	1.5	0.9802	ALIGNED	5.45	5.38	5.56	35743976	0.1	0.9878	TRUE	5.45	5.35	5.54	8614170	-0.1	0.9795	TRUE
sp|P02662|CASA1_BOVIN	IGVNQ	265.6503++	2	265.65	IGVNQ	5.4	5.33	5.51	18823382	0.1	0.9765	TRUE	5.41	5.32	5.52	20177636	-0.5	0.978	TRUE	5.42	5.35	5.53	21814152	0	0.9793	TRUE	5.42	5.35	5.53	315082	0.6	0.9764	ALIGNED	5.45	5.38	5.56	3030096	0	0.9763	TRUE	5.45	5.35	5.54	1067635	-0.5	0.9568	TRUE
sp|P02662|CASA1_BOVIN	IGVNQELAY	503.7638++	2	503.764	IGVNQELAY															12.66	12.49	12.8	5537353	-0.3	0.951	ALIGNED								12.81	12.66	12.99	1153291	3.7	0.9788	ALIGNED	12.76	12.69	12.96	16309388	0.6	0.9929	TRUE
sp|P02662|CASA1_BOVIN	GVNQEL	659.3359+	1	659.336	GVNQEL	8.15	8.07	8.24	23401076	0.7	0.9663	TRUE	8.14	8.06	8.24	26488230	0.4	0.9918	ALIGNED	8.16	8.07	8.25	14707661	0	0.9581	ALIGNED	8.18	8.12	8.26	208845	0.3	0.9165	ALIGNED	8.2	8.14	8.27	818224	0	0.963	ALIGNED	8.21	8.07	8.41	1636552	-0.3	0.976	ALIGNED
sp|P02662|CASA1_BOVIN	NQELA	574.2831+	1	574.283	NQELA	4.94	4.86	5.05	1644030464	-0.8	0.993	TRUE	4.92	4.85	5.03	1746040704	-1.1	0.9937	TRUE	4.96	4.83	5.04	1274740224	-0.9	0.9905	TRUE															5.09	5.01	5.17	851794	-0.6	0.9703	ALIGNED
sp|P02662|CASA1_BOVIN	NQELA	287.6452++	2	287.645	NQELA	4.93	4.86	5.05	61292812	-0.9	0.977	TRUE	4.93	4.85	5.03	51607028	-1.1	0.9833	TRUE
sp|P02662|CASA1_BOVIN	NQEL	503.2460+	1	503.246	NQEL	5.33	5.25	5.49	2485791232	-0.3	0.9901	TRUE	5.32	5.24	5.48	2939299072	-0.3	0.991	ALIGNED	5.35	5.28	5.51	1812226560	0	0.9898	TRUE	5.42	5.34	5.54	1753256	1.1	0.9851	ALIGNED	5.48	5.41	5.59	6202064	-0.1	0.976	TRUE	5.49	5.42	5.63	4271162	-0.3	0.972	ALIGNED
sp|P02662|CASA1_BOVIN	QELAYF	770.3719+	1	770.372	QELAYF																																				14.81	14.72	14.95	5810412	3.3	0.9859	TRUE
sp|P02662|CASA1_BOVIN	ELAYF	642.3134+	1	642.313	ELAYF																													14.84	14.75	14.97	255736	-1.2	0.8898	ALIGNED	14.79	14.68	14.92	26526956	2.6	0.9818	TRUE
sp|P02662|CASA1_BOVIN	AYFYPE	789.3454+	1	789.345	AYFYPE	12.62	12.51	12.82	98960976	0.2	0.9908	ALIGNED	12.61	12.5	12.81	68236640	-0.5	0.9919	TRUE	12.6	12.47	12.76	32675854	0.7	0.9933	ALIGNED	12.64	12.51	12.76	761023	1.4	0.9837	ALIGNED	12.6	12.48	12.72	2585448	0.6	0.9811	ALIGNED	12.57	12.48	12.75	7568712	-1	0.9938	ALIGNED
sp|P02662|CASA1_BOVIN	AYFYPE	395.1763++	2	395.176	AYFYPE	12.62	12.51	12.82	57501640	0.5	0.9924	ALIGNED	12.63	12.5	12.81	41516472	-0.1	0.9818	TRUE	12.61	12.47	12.76	22161076	1.1	0.9893	ALIGNED	12.62	12.51	12.76	1022213	1.6	0.9954	ALIGNED	12.6	12.48	12.72	2819595	0.9	0.9911	ALIGNED	12.57	12.48	12.75	7543123	-0.8	0.9962	ALIGNED
sp|P02662|CASA1_BOVIN	AYFYPEL	902.4294+	1	902.429	AYFYPEL	17.47	17.36	17.63	173782592	0	0.9959	TRUE	17.46	17.36	17.61	173650688	-0.1	0.994	TRUE	17.4	17.29	17.56	8745010	0.1	0.9653	ALIGNED															17.34	17.31	17.69	380918	-0.2	0.8914	ALIGNED
sp|P02662|CASA1_BOVIN	AYFYPEL	451.7184++	2	451.718	AYFYPEL	17.47	17.36	17.63	188522832	0.2	0.9959	TRUE	17.47	17.36	17.61	181265184	0.1	0.994	TRUE	17.39	17.29	17.56	10037892	1.9	0.9819	ALIGNED	17.39	17.06	17.46	126476	-1.4	0.8663	ALIGNED								17.49	17.31	17.69	162593	-1.5	0.9282	ALIGNED
sp|P02662|CASA1_BOVIN	YFYPEL	831.3923+	1	831.392	YFYPEL	17.07	16.93	17.23	2653861376	-1.1	0.9944	TRUE	17.05	16.93	17.21	3008251648	-1.4	0.996	TRUE	16.98	16.87	17.12	276629504	-0.3	0.994	TRUE
sp|P02662|CASA1_BOVIN	YFYPE	718.3083+	1	718.308	YFYPE	11.78	11.61	12.02	1073849088	-0.9	0.9927	TRUE	11.8	11.6	12.03	836799104	-1.3	0.9926	TRUE	11.78	11.58	11.98	927571904	-0.5	0.9926	TRUE	11.79	11.64	11.98	1084265	0.6	0.9823	ALIGNED	11.78	11.6	11.96	3988341	-0.5	0.9896	ALIGNED	11.75	11.58	11.97	8399527	0.1	0.9873	TRUE
sp|P02662|CASA1_BOVIN	YFYPE	359.6578++	2	359.658	YFYPE	11.81	11.61	12.02	330827072	-0.9	0.9879	TRUE	11.8	11.6	12.03	264264592	-1.3	0.9913	TRUE	11.75	11.58	11.98	327313984	-0.6	0.9907	TRUE	11.77	11.64	11.98	842960	0.9	0.9926	ALIGNED	11.75	11.6	11.96	2485891	0	0.98	ALIGNED	11.75	11.58	11.97	5462760	-0.2	0.9795	TRUE
sp|P02662|CASA1_BOVIN	FYPE	555.2449+	1	555.245	FYPE	8.84	8.42	9.43	2267942656	-0.5	0.9901	TRUE	8.89	8.42	9.42	1788162688	-0.9	0.9898	TRUE	8.89	8.45	9.41	2249298432	-0.3	0.9918	ALIGNED	8.93	8.5	9.29	862244	-1.1	0.9562	ALIGNED	8.97	8.51	9.42	6612809	0.1	0.9819	ALIGNED	8.87	8.49	9.4	18704284	-0.6	0.9905	ALIGNED
sp|P02662|CASA1_BOVIN	PEL	358.1973+	1	358.197	PEL	6.95	6.83	7.09	1080790912	-1.1	0.9857	TRUE	6.93	6.82	7.08	1212224128	-1.4	0.9857	TRUE	6.98	6.88	7.1	448215392	-1	0.9835	TRUE	9.39	9.27	9.52	1686794	-0.2	0.996	TRUE	7.07	7.01	7.25	3888333	-1.1	0.9796	TRUE	7.1	7.03	7.3	631697	-0.7	0.8913	ALIGNED
sp|P02662|CASA1_BOVIN	FRQFYQL	501.2638++	2	501.264	FRQFYQL																						14.46	14.37	14.6	2746436	2.3	0.9801	TRUE	14.49	14.3	14.59	1035859	0.8	0.9507	ALIGNED
sp|P02662|CASA1_BOVIN	FRQF	299.1608++	2	299.161	FRQF	8.37	8.31	8.48	2372100	0.2	0.8538	ALIGNED	8.35	8.31	8.46	2887456	-0.5	0.9469	ALIGNED	8.44	8.37	8.48	685635	0.5	0.8439	ALIGNED	8.49	8.4	8.63	6007812	0.2	0.9791	TRUE
sp|P02662|CASA1_BOVIN	FRQFY	380.6925++	2	380.692	FRQFY								10.87	10.79	10.97	3230940	-0.5	0.9169	ALIGNED								10.89	10.8	11	472696	0.8	0.966	ALIGNED	10.9	10.73	11.04	800581	-0.8	0.9013	ALIGNED	10.9	10.84	11.06	1747923	-1.9	0.9573	TRUE
sp|P02662|CASA1_BOVIN	YQL	424.2078+	1	424.208	YQ[+1]L	9.89	9.79	10.01	43595992	-0.5	0.944	TRUE	9.88	9.75	10	21858748	-1	0.9191	ALIGNED								9.94	9.89	10.07	178053	-0.7	0.8601	ALIGNED
sp|P02662|CASA1_BOVIN	QLDAYPSGA	921.4312+	1	921.431	QLDAYPSGA	9.35	9.3	9.45	21660618	-0.1	0.9856	ALIGNED	9.35	9.3	9.44	17720652	0	0.9963	TRUE	9.35	9.29	9.43	3605271	0.1	0.9528	ALIGNED
sp|P02662|CASA1_BOVIN	QLDAYPS	793.3727+	1	793.373	QLDAYPS	8.7	8.6	8.79	959047872	-0.4	0.994	TRUE	8.66	8.59	8.79	943941952	-0.9	0.9931	TRUE	8.69	8.6	8.8	431761632	-0.3	0.9927	TRUE															8.92	8.83	9.03	103353	2.4	0.9731	ALIGNED
sp|P02662|CASA1_BOVIN	QLDAYPS	397.1900++	2	397.19	QLDAYPS	8.69	8.6	8.79	342376192	0	0.9931	TRUE	8.66	8.59	8.79	304238112	-0.3	0.9919	TRUE	8.67	8.6	8.8	219502272	-0.1	0.993	TRUE
sp|P02662|CASA1_BOVIN	LDA	318.1660+	1	318.166	LDA	3.77	3.7	3.9	46931100	-0.2	0.9792	ALIGNED	3.76	3.67	3.87	52947908	-0.7	0.9744	TRUE	3.78	3.68	3.89	59445288	-0.5	0.9849	ALIGNED	4.08	3.97	4.15	333405	0.4	0.9019	ALIGNED	3.88	3.82	4.06	549987	-0.7	0.945	ALIGNED	3.97	3.86	4.06	120188	-0.6	0.8551	ALIGNED
sp|P02662|CASA1_BOVIN	LDAYPS	665.3141+	1	665.314	LDAYPS	7.91	7.83	8.02	476503040	0	0.9899	TRUE	7.9	7.81	8.01	520927552	-0.5	0.9931	TRUE	7.92	7.82	8.03	298071776	-0.1	0.9902	TRUE
sp|P02662|CASA1_BOVIN	LDAYPS	333.1607++	2	333.161	LDAYPS	7.91	7.83	8.02	111591768	-1.9	0.9881	TRUE	7.9	7.81	8.01	118238576	-2.3	0.9893	TRUE	7.92	7.82	8.03	80068072	-1.6	0.9824	TRUE
sp|P02662|CASA1_BOVIN	DAYPS	552.2300+	1	552.23	DAYPS	4.96	4.72	5.16	5878985728	-0.3	0.9921	TRUE	4.94	4.7	5.16	6103730176	-0.8	0.9928	TRUE	4.99	4.73	5.19	5107097088	-0.5	0.9932	TRUE								5.03	4.78	5.19	1661763	-1.8	0.86	ALIGNED	5.06	4.83	5.2	1101627	-1.5	0.8651	ALIGNED
sp|P02662|CASA1_BOVIN	DAYPSGAW	866.3679+	1	866.368	DAYPSGAW	12.42	12.29	12.67	180253120	-1.1	0.9959	TRUE	12.42	12.29	12.66	153036768	-1.7	0.9992	TRUE	12.39	12.29	12.58	8897698	-2.3	0.9348	ALIGNED	12.43	12.29	12.65	1325259	2.4	0.9905	ALIGNED	12.41	12.26	12.54	473296	3.1	0.9443	ALIGNED
sp|P02662|CASA1_BOVIN	DAYPSG	609.2515+	1	609.251	DAYPSG	5.06	4.88	5.2	243802800	-0.7	0.9893	ALIGNED	5.07	4.87	5.19	167464496	-1.4	0.988	TRUE	5.07	4.89	5.25	137861376	-0.9	0.9816	TRUE								5.11	5	5.18	450481	1.2	0.9314	ALIGNED
sp|P02662|CASA1_BOVIN	DAYPSGA	680.2886+	1	680.289	DAYPSGA	6.1	6.01	6.22	884744192	-0.4	0.9943	TRUE	6.09	6.01	6.21	797704512	-0.8	0.993	TRUE	6.11	6.01	6.22	516570144	-0.7	0.9921	TRUE	6.14	6.07	6.25	36353	4.7	0.8404	ALIGNED
sp|P02662|CASA1_BOVIN	DAYPSGA	340.6479++	2	340.648	DAYPSGA	6.1	6.01	6.22	148722112	-0.4	0.9848	TRUE	6.11	6.01	6.21	133416312	-0.8	0.9913	TRUE	6.11	6.01	6.22	102860384	-0.4	0.9843	TRUE
sp|P02662|CASA1_BOVIN	AYPSGA	565.2617+	1	565.262	AYPSGA	5.36	5.27	5.47	20602764	-0.6	0.9765	ALIGNED	5.36	5.22	5.48	37116248	-1	0.9775	TRUE	5.38	5.28	5.51	31563576	-0.8	0.9822	ALIGNED
sp|P02662|CASA1_BOVIN	YPSGA	494.2245+	1	494.225	YPSGA	4.96	4.66	5.09	341101856	-0.8	0.9834	TRUE	4.94	4.65	5.09	333665280	-1.2	0.9844	TRUE	4.99	4.69	5.1	411670112	-0.7	0.9839	TRUE
sp|P02662|CASA1_BOVIN	YPSGAW	680.3039+	1	680.304	YPSGAW	11.65	11.27	12.2	287929088	3.7	0.9224	TRUE	11.61	11.27	12.04	287937024	4.2	0.9065	TRUE
sp|P02662|CASA1_BOVIN	PSGAW	517.2405+	1	517.241	PSGAW	8.45	8.38	8.58	63492124	-0.6	0.9823	TRUE	8.45	8.35	8.56	69342808	-1	0.9744	TRUE	8.47	8.38	8.65	48238128	-1	0.9761	ALIGNED
sp|P02662|CASA1_BOVIN	GAW	333.1557+	1	333.156	GAW	7.5	7.36	7.7	2504830720	-0.7	0.9835	TRUE	7.43	7.33	7.67	2820271616	-0.8	0.9832	TRUE	7.52	7.39	7.69	1555362176	-0.7	0.9835	ALIGNED
sp|P02662|CASA1_BOVIN	YYVP	541.2657+	1	541.266	YYVP	10.68	10.54	10.92	25359372	0.8	0.9341	ALIGNED	10.68	10.55	10.96	29302564	0.7	0.9391	ALIGNED	10.67	10.56	10.9	46270184	1	0.9763	TRUE
sp|P02662|CASA1_BOVIN	YYVPL	654.3497+	1	654.35	YYVPL	14.82	14.73	14.94	2883145472	-0.7	0.992	TRUE	14.8	14.7	14.92	2713396224	-1	0.9919	TRUE	14.76	14.67	14.9	1286585984	0	0.9934	TRUE	14.79	14.69	14.91	1005371	1.3	0.89	ALIGNED	14.77	14.67	14.89	1132569	3.5	0.959	ALIGNED
sp|P02662|CASA1_BOVIN	YYVPL	327.6785++	2	327.679	YYVPL	14.8	14.73	14.94	342991392	-1	0.9896	TRUE	14.78	14.7	14.92	333926912	-1.3	0.9895	TRUE	14.74	14.67	14.9	184154112	-0.2	0.9844	TRUE	14.79	14.69	14.91	188279	1.7	0.9302	ALIGNED	14.79	14.67	14.89	245985	2.1	0.9217	ALIGNED
sp|P02662|CASA1_BOVIN	YVP	378.2023+	1	378.202	YVP	6.18	5.68	6.19	6476678	1.1	0.9478	ALIGNED	6.1	5.96	6.14	8948448	0.5	0.9747	ALIGNED	6.24	5.98	6.63	155938224	-3.9	0.8259	ALIGNED								6.17	6.08	6.25	1335332	1.1	0.9663	ALIGNED	6.19	6.07	6.29	4436858	1.6	0.8084	TRUE
sp|P02662|CASA1_BOVIN	YVPL	491.2864+	1	491.286	YVPL	11.12	11.02	11.29	18424162304	-0.6	0.9915	TRUE	11.12	11	11.27	20196542464	-0.9	0.9935	TRUE	11.12	11.04	11.29	16356618240	-0.3	0.9931	TRUE	11.27	11.14	11.44	4678370	0.1	0.9653	ALIGNED	11.31	11.12	11.43	9802606	-3.3	0.9604	ALIGNED	11.29	11.26	11.44	3677247	-1.6	0.9822	ALIGNED
sp|P02662|CASA1_BOVIN	YVPLGTQ	777.4141+	1	777.414	YVPLGTQ	9.48	9.36	9.7	83701824	-0.3	0.9906	TRUE	9.5	9.36	9.68	100895512	-0.9	0.9918	ALIGNED	9.51	9.39	9.63	11892436	-1.2	0.9208	ALIGNED
sp|P02662|CASA1_BOVIN	YVPLG	548.3079+	1	548.308	YVPLG	9.98	9.88	10.13	201102416	0.2	0.9852	TRUE	9.99	9.87	10.11	152290240	0	0.9862	TRUE	9.97	9.88	10.14	179600320	0.5	0.985	TRUE
sp|P02662|CASA1_BOVIN	VPLGTQ	614.3508+	1	614.351	VPLGTQ	6.69	6.55	7.02	2035794688	-0.5	0.9917	TRUE	6.64	6.54	7.01	2122820864	-1	0.9913	TRUE	6.68	6.56	7.01	407605248	-0.5	0.9929	TRUE								6.75	6.66	6.88	267367	0.3	0.8476	ALIGNED
sp|P02662|CASA1_BOVIN	PLGT	387.2238+	1	387.224	PLGT	4.71	4.58	4.8	18310806	-0.6	0.8888	TRUE	4.7	4.59	4.77	24159690	-0.7	0.959	ALIGNED	4.73	4.63	4.81	41461376	-0.6	0.9568	TRUE	4.87	4.8	4.99	73884	-2.9	0.8334	ALIGNED	4.96	4.84	5.09	162781	0	0.8783	ALIGNED
sp|P02662|CASA1_BOVIN	LGT	290.1710+	1	290.171	LGT	3.13	3.08	3.23	30959166	-0.8	0.9839	TRUE	3.13	3.08	3.23	32726656	-1.3	0.9701	TRUE	3.13	3.08	3.25	35243148	-1.2	0.9802	TRUE
sp|P02662|CASA1_BOVIN	QYTDA	597.2515+	1	597.251	QYTDA	3.96	3.91	4.13	26531364	0.5	0.9891	TRUE	3.96	3.89	4.11	25692700	0.2	0.9816	TRUE	3.98	3.91	4.03	7636131	0.2	0.9744	ALIGNED
sp|P02662|CASA1_BOVIN	QYTDAPS	781.3363+	1	781.336	QYTDAPS	5.36	5.29	5.53	112095216	-0.7	0.9984	TRUE	5.35	5.29	5.51	130347264	-0.7	0.9973	TRUE	5.36	5.29	5.52	33316482	-0.6	0.993	ALIGNED
sp|P02662|CASA1_BOVIN	QYTDAPS	391.1718++	2	391.172	QYTDAPS	5.37	5.29	5.53	23616738	-0.5	0.973	TRUE	5.36	5.29	5.51	25407626	-0.8	0.9602	TRUE	5.35	5.29	5.52	7565750	-0.8	0.9598	ALIGNED
sp|P02662|CASA1_BOVIN	YTDAPS	653.2777+	1	653.278	YTDAPS	4.37	4.3	4.47	2788612096	-0.3	0.9947	ALIGNED	4.35	4.28	4.46	2539877120	-0.8	0.9957	TRUE	4.39	4.3	4.48	1235812992	-0.4	0.993	TRUE								4.45	4.36	4.56	3088540	-1.6	0.9813	ALIGNED
sp|P02662|CASA1_BOVIN	YTDAPSFSDIPNPI	768.8645++	2	768.864	YTDAPSFSDIPNPI	17.54	17.41	17.69	10413817	1.4	0.996	TRUE	17.53	17.41	17.67	10723624	1.4	0.9792	ALIGNED	17.41	17.29	17.56	2962198	2.7	0.9738	ALIGNED
sp|P02662|CASA1_BOVIN	TDAPS	490.2144+	1	490.214	TDAPS	1.92	1.79	2.03	4452658176	-0.5	0.9934	ALIGNED	1.9	1.77	2.01	4815685632	-0.7	0.9943	TRUE	1.92	1.79	2.04	2153166592	-0.3	0.9929	ALIGNED								2.03	1.85	2.15	4089224	-0.1	0.9811	ALIGNED
sp|P02662|CASA1_BOVIN	TDAPSFS	724.3148+	1	724.315	TDAPSFS	8.6	8.51	8.72	132251752	0	0.9945	TRUE	8.57	8.49	8.7	158223072	-0.6	0.9886	TRUE	8.59	8.5	8.72	64557364	-0.4	0.9882	ALIGNED								8.61	8.48	8.67	170097	-4.5	0.9427	ALIGNED	8.6	8.57	8.66	27820	1.7	0.8063	ALIGNED
sp|P02662|CASA1_BOVIN	TDAPSF	637.2828+	1	637.283	TDAPSF	9.94	9.84	10.05	100974144	-1	0.9889	TRUE	9.92	9.82	10.04	96801424	-1.4	0.9902	TRUE	9.93	9.86	10.01	2587994	-1	0.9062	ALIGNED	9.94	9.9	10.03	54492	0.3	0.849	ALIGNED	9.96	9.91	10.06	340742	-0.1	0.8415	ALIGNED
sp|P02662|CASA1_BOVIN	TDAPSFSDIPNPI	1373.6583+	1	1373.66	TDAPSFSDIPNPI	17.01	16.87	17.17	175119632	-0.3	0.995	TRUE	17.01	16.85	17.15	170905792	-0.7	0.9942	TRUE	16.91	16.78	17.07	36665148	0.5	0.9941	TRUE
sp|P02662|CASA1_BOVIN	TDAPSFSDIPNPI	687.3328++	2	687.333	TDAPSFSDIPNPI	17.01	16.87	17.17	909867584	-0.9	0.9961	TRUE	16.98	16.85	17.15	852555968	-1.2	0.9965	TRUE	16.91	16.78	17.07	316793536	-0.3	0.9953	TRUE
sp|P02662|CASA1_BOVIN	PSF	350.1710+	1	350.171	PSF	7.38	7.29	7.49	216350528	-0.6	0.9829	ALIGNED	7.37	7.28	7.49	198297392	-1.3	0.9845	TRUE																						7.46	7.33	7.56	155207	-0.7	0.8353	ALIGNED
sp|P02662|CASA1_BOVIN	PSFSDIPNPI	1086.5466+	1	1086.55	PSFSDIPNPI	16.32	16.24	16.47	32827138	-0.4	0.9842	TRUE	16.31	16.2	16.53	36926320	-0.4	0.9925	TRUE	16.25	16.15	16.32	9435475	0.1	0.9757	ALIGNED
sp|P02662|CASA1_BOVIN	PSFSDIPNPI	543.7769++	2	543.777	PSFSDIPNPI	16.32	16.24	16.47	54993340	0.1	0.9846	TRUE	16.31	16.2	16.53	67247600	0.1	0.9742	TRUE	16.24	16.15	16.32	16072799	-0.8	0.9517	ALIGNED
sp|P02662|CASA1_BOVIN	FSDIPNPI	902.4618+	1	902.462	FSDIPNPI	14.97	14.84	15.07	119808976	-1.4	0.9922	TRUE	14.95	14.82	15.06	135181824	-1.9	0.9764	TRUE	14.91	14.74	15.04	240073824	-0.8	0.9972	TRUE
sp|P02662|CASA1_BOVIN	FSDIPNPI	451.7345++	2	451.735	FSDIPNPI	14.99	14.84	15.07	73558752	-1.2	0.9815	TRUE	14.95	14.82	15.06	73432648	-1.5	0.9743	TRUE	14.9	14.74	15.04	168553888	-0.5	0.9948	TRUE								14.87	14.81	15	87743	2.6	0.9619	ALIGNED
sp|P02662|CASA1_BOVIN	SDIPNPIGSENSEK	743.8546++	2	743.855	SDIPNPIGSENSEK	10.58	10.28	10.76	1152797696	-1	0.993	TRUE	10.54	10.22	10.73	968834432	-1.3	0.9964	TRUE	10.53	10.21	10.66	175436320	0.7	0.9641	TRUE	10.56	10.42	10.67	166999	1	0.9469	ALIGNED	10.54	10.32	10.64	1233022	1.4	0.9758	ALIGNED	10.51	10.34	10.6	153869	0.5	0.9173	ALIGNED
sp|P02662|CASA1_BOVIN	SDIPNPIGSENSEK	496.2388+++	3	496.239	SDIPNPIGSENSEK	10.58	10.28	10.76	159890912	-1	0.9978	TRUE	10.57	10.22	10.73	132485520	-1.4	0.9855	TRUE	10.58	10.21	10.66	22417280	1.8	0.9103	TRUE
sp|P02662|CASA1_BOVIN	SDIPNPIGSEN	1142.5324+	1	1142.53	SDIPNPIGSEN	11.65	11.35	11.8	285909984	0.4	0.9946	TRUE	11.61	11.38	11.72	223730256	0	0.9889	TRUE	11.56	11.32	11.71	57678376	0.2	0.9923	TRUE
sp|P02662|CASA1_BOVIN	SDIPNPIGSEN	571.7698++	2	571.77	SDIPNPIGSEN	11.62	11.35	11.8	553927680	0	0.9947	TRUE	11.61	11.38	11.72	456371392	-0.5	0.9968	TRUE	11.56	11.32	11.71	161327488	0.2	0.9958	TRUE	11.58	11.2	11.71	1192607	0.3	0.9479	ALIGNED	11.55	11.26	11.66	4520200	-0.1	0.9872	ALIGNED	11.51	11.27	11.61	649524	-0.9	0.8608	ALIGNED
sp|P02662|CASA1_BOVIN	SDIPNPI	755.3934+	1	755.393	SDIPNPI	12.43	12.26	12.64	14538097664	-0.7	0.9946	TRUE	12.42	12.25	12.63	16239423488	-1.2	0.996	TRUE	12.4	12.21	12.58	11806732288	-0.8	0.9958	TRUE	12.45	12.32	12.59	148500	1.3	0.8204	ALIGNED	12.42	12.29	12.62	208395	2.3	0.9339	ALIGNED
sp|P02662|CASA1_BOVIN	SDIPNPI	378.2003++	2	378.2	SDIPNPI	12.43	12.26	12.64	5092405760	-0.7	0.9947	TRUE	12.42	12.25	12.63	5169730560	-1.2	0.9924	TRUE	12.4	12.21	12.58	4592945152	-0.7	0.9923	TRUE	12.43	12.32	12.59	173376	0.6	0.826	ALIGNED	12.44	12.29	12.62	271454	2.4	0.9466	ALIGNED
sp|P02662|CASA1_BOVIN	DIPNPIGSEN	528.2538++	2	528.254	DIPNPIGSEN																						11.52	11.32	11.67	2173240	0.1	0.9826	ALIGNED	11.47	11.28	11.6	8463381	0.2	0.9834	TRUE	11.39	11.31	11.54	795416	-1.3	0.958	ALIGNED
sp|P02662|CASA1_BOVIN	DIPNPI	668.3614+	1	668.361	DIPNPI	12.47	12.32	12.61	300119520	-1	0.9862	ALIGNED	12.44	12.29	12.6	365064160	-1.5	0.9816	ALIGNED	12.41	12.27	12.57	323019360	-1	0.9855	TRUE	12.44	12.23	12.62	257454	2.3	0.9317	ALIGNED
sp|P02662|CASA1_BOVIN	IPNPIGSEN	470.7404++	2	470.74	IPNPIGSEN																						10.53	10.15	10.67	17466818	0.5	0.9917	TRUE	10.51	10.14	10.64	16218750	0.5	0.9919	TRUE
sp|P02662|CASA1_BOVIN	IPNPIG	610.3559+	1	610.356	IPNPIG	10.88	10.55	10.98	102499272	0.2	0.981	TRUE	10.85	10.52	11.04	28584934	-1.1	0.9237	ALIGNED	10.82	10.57	10.89	4213623	2.7	0.9157	ALIGNED	10.87	10.52	11	20291800	1.3	0.9882	TRUE	10.86	10.59	10.99	16415149	1.5	0.9849	TRUE	10.66	10.61	10.9	1337720	4.9	0.9183	ALIGNED
sp|P02662|CASA1_BOVIN	IPNPIG	305.6816++	2	305.682	IPNPIG	10.86	10.55	10.98	13357330	-1.1	0.9134	TRUE	10.86	10.52	11.04	3175792	-1.4	0.8466	ALIGNED	10.68	10.57	10.89	661917	-1.1	0.8518	ALIGNED	10.87	10.52	11	8660111	0.8	0.98	TRUE	10.86	10.59	10.99	5104976	0.5	0.9799	TRUE	10.83	10.61	10.9	94288	0.3	0.9635	ALIGNED
sp|P02662|CASA1_BOVIN	IPNPIGSENSEK	642.8251++	2	642.825	IPNPIGSENSEK	9.45	9.25	9.58	43091144	-0.6	0.9854	TRUE	9.43	9.19	9.55	29057376	-1.1	0.97	ALIGNED	9.15	8.76	9.52	39693136	-2.4	0.8241	ALIGNED	9.49	9.02	9.66	1993341	1.3	0.9818	ALIGNED	9.48	9.11	9.59	2297048	2.2	0.9586	ALIGNED	9.47	9.42	9.52	47036	3.5	0.8677	ALIGNED
sp|P02662|CASA1_BOVIN	PNPI	440.2504+	1	440.25	PNPI	12.43	12.27	12.66	308084288	-0.5	0.9749	TRUE	12.42	12.17	12.67	331533760	-1	0.9764	TRUE	12.39	12.24	12.59	281397184	-0.6	0.9808	TRUE															12.27	12.04	12.5	4518701	2.1	0.8751	ALIGNED
sp|P02662|CASA1_BOVIN	NPIGSE	616.2937+	1	616.294	NPIGSE	5.37	5.31	5.44	1491885	3.9	0.8373	ALIGNED															5.52	5.45	5.65	5006080	-0.4	0.9868	TRUE	5.57	5.48	5.67	6575898	-1.2	0.9689	ALIGNED	5.57	5.5	5.66	918783	-1.3	0.9579	ALIGNED
sp|P02662|CASA1_BOVIN	NPIGSEN	730.3366+	1	730.337	NPIGSEN	4.93	4.83	5.01	20433424	-0.9	0.9937	TRUE	4.92	4.87	5.01	10571752	-0.9	0.993	ALIGNED	4.93	4.9	4.99	417955	-2.8	0.8556	ALIGNED	4.98	4.91	5.11	6826956	1	0.991	TRUE	5.01	4.94	5.1	20706590	-1.2	0.9902	TRUE	5.02	4.98	5.07	95070	0.1	0.8134	ALIGNED
sp|P02662|CASA1_BOVIN	NPIGSEN	365.6719++	2	365.672	NPIGSEN	4.93																					4.98	4.91	5.11	4783518	0.7	0.9891	TRUE	5.01	4.94	5.1	5379161	-1	0.9833	TRUE
sp|P02662|CASA1_BOVIN	IGS	276.1554+	1	276.155	IGS	1.76	1.7	1.87	16889622	-0.9	0.958	ALIGNED	1.54	1.34	1.7	20709584	-0.8	0.9548	ALIGNED	1.55	1.45	1.7	10473484	-0.7	0.9734	TRUE	1.82	1.59	2.06	86794	0.6	0.9381	ALIGNED	1.89	1.7	2.04	237857	-0.5	0.8904	ALIGNED
sp|P02662|CASA1_BOVIN	IGSEN	519.2409+	1	519.241	IGSEN	1.97	1.92	2.04	2110734	-0.7	0.8636	ALIGNED	1.97	1.9	2.07	5082598	-0.7	0.9278	ALIGNED	1.98	1.94	2.07	1352892	0.1	0.8718	ALIGNED	2.02	1.93	2.17	1505188	1.2	0.9828	ALIGNED	2.09	2.01	2.2	23611800	0.2	0.9883	TRUE	2.09	2.02	2.2	890655	0.8	0.9791	ALIGNED
sp|P02662|CASA1_BOVIN	GSENSEKT	426.1907++	2	426.191	GSENSEKT	0.82	0.77	0.87	48689088	-1.5	0.9919	TRUE	0.8	0.77	0.87	55114212	-1.6	0.9849	TRUE
sp|P02662|CASA1_BOVIN	GSENSEK	750.3264+	1	750.326	GSENSEK								0.59	0.55	0.66	399497120	-2.1	0.9883	TRUE	0.59	0.55	0.67	150525872	-2.1	0.9864	TRUE
sp|P02662|CASA1_BOVIN	GSENSEK	375.6669++	2	375.667	GSENSEK	0.59	0.52	0.79	120482824	-2.1	0.9858	TRUE	0.59	0.55	0.66	131322064	-2.1	0.9829	TRUE	0.59	0.55	0.67	65843064	-2.3	0.9868	TRUE
sp|P02662|CASA1_BOVIN	KTTMPL	706.3804+	1	706.38	KTTM[+16]PL	5.56	5.56	5.8	11317703	2.7	0.8959	TRUE								5.68	5.61	5.81	5532511	0.9	0.978	ALIGNED
sp|P02662|CASA1_BOVIN	KTTMPL	353.6938++	2	353.694	KTTM[+16]PL	5.66	5.56	5.8	10541308	0.3	0.9343	TRUE	5.64	5.54	5.75	7201764	0.5	0.8875	ALIGNED	5.67	5.61	5.81	5430797	1.1	0.9234	ALIGNED
sp|P02662|CASA1_BOVIN	KTTMPL	345.6964++	2	345.696	KTTMPL	9.37	9.24	9.55	195415648	-0.2	0.9424	TRUE	9.37	9.2	9.54	167857696	-0.5	0.9379	TRUE	9.39	9.26	9.55	92363088	-0.6	0.9365	TRUE	9.41	9.29	9.52	520692	0.1	0.9095	ALIGNED	9.48	9.38	9.66	767080	1.1	0.9551	ALIGNED	9.49	9.35	9.58	477506	-0.4	0.9365	ALIGNED
sp|P02662|CASA1_BOVIN	TTM	352.1537+	1	352.154	TTM	2.64	2.55	2.79	577555328	-0.3	0.9837	TRUE	2.61	2.53	2.79	593197824	-0.7	0.9875	TRUE	2.64	2.54	2.8	294027040	-0.8	0.9745	TRUE															2.98	2.92	3.05	52721	0.2	0.9537	ALIGNED
sp|P02662|CASA1_BOVIN	TTMPL	562.2905+	1	562.291	TTMPL	11.17	11.05	11.41	21052905472	-0.7	0.9578	ALIGNED	11.15	11.03	11.4	23431182336	-0.9	0.9593	ALIGNED	11.19	11.05	11.38	19441870848	-0.4	0.959	ALIGNED	11.3	11.17	11.41	4282128	0.4	0.921	TRUE	11.31	11.21	11.5	7253230	-0.2	0.9354	ALIGNED	11.3	11.21	11.37	1597297	0.8	0.9344	ALIGNED
sp|P02662|CASA1_BOVIN	PLW	415.2340+	1	415.234	PLW	14.07	13.97	14.21	2169910528	-0.8	0.9869	TRUE	14.06	13.96	14.21	2159810816	-1.4	0.9878	TRUE	14.05	13.85	14.23	103499640	-0.7	0.9715	TRUE	14.02	13.91	14.18	24821592	1.6	0.9806	TRUE	14.04	13.94	14.23	25337078	1.6	0.9573	TRUE	14.03	13.93	14.35	2874013	-4.6	0.9136	ALIGNED
sp|P02663|CASA2_BOVIN	KNTM	493.2439+	1	493.244	KNTM	1.12	1.08	1.17	93581992	-1.3	0.9517	TRUE	1.12	1.08	1.18	109957272	-1.8	0.9491	TRUE								1.38	1.38	1.45	8258	-1.6	0.8229	ALIGNED	1.29	1.25	1.48	200006	0.4	0.8288	ALIGNED	1.31	1.24	1.49	2145192	1	0.9352	ALIGNED
sp|P02663|CASA2_BOVIN	KNTME	319.6443++	2	319.644	KNTM[+16]E															1.58	1.55	1.63	275954	-3.3	0.8147	ALIGNED	1.66	1.53	1.82	2978331	0.5	0.9448	TRUE	1.73	1.54	1.88	1046490	-0.1	0.9636	ALIGNED	1.75	1.66	1.89	452297	-0.2	0.9206	ALIGNED
sp|P02663|CASA2_BOVIN	KNTM	509.2388+	1	509.239	KNTM[+16]																						1.2	1.14	1.27	4472638	1.1	0.954	TRUE	1.19	1.13	1.29	1607517	-0.2	0.9434	ALIGNED	1.3	1.24	1.48	1086269	0.8	0.9435	ALIGNED
sp|P02663|CASA2_BOVIN	KNTMEH	759.3454+	1	759.345	KNTMEH	0.97	0.91	1.06	99758184	-1.4	0.9754	TRUE	0.97	0.9	1.06	129172344	-1.8	0.9727	TRUE	0.97	0.91	1.04	85536816	-1.5	0.9737	TRUE
sp|P02663|CASA2_BOVIN	KNTMEH	380.1763++	2	380.176	KNTMEH	0.99	0.91	1.06	410466304	-1.1	0.9564	TRUE	0.97	0.9	1.06	431193728	-0.7	0.956	TRUE	0.99	0.91	1.04	319383680	-0.1	0.9505	TRUE
sp|P02663|CASA2_BOVIN	KNTME	622.2865+	1	622.286	KNTME	1.64	1.42	1.73	10143892	-1	0.8969	ALIGNED	1.63	1.46	1.72	7914447	-1.2	0.8886	ALIGNED	1.63	1.42	1.72	5150151	1.6	0.8879	ALIGNED	1.66	1.53	1.82	3090280	1	0.9587	TRUE	1.75	1.63	1.9	3814787	1.2	0.9512	TRUE	1.77	1.68	1.89	559531	0.7	0.9483	ALIGNED
sp|P02663|CASA2_BOVIN	KNTME	311.6469++	2	311.647	KNTME	1.64	1.42	1.73	7152801	-1.5	0.8543	ALIGNED	1.63	1.46	1.72	5144704	-0.8	0.8768	ALIGNED	1.59	1.42	1.72	3378704	0.8	0.8682	ALIGNED	1.66	1.53	1.82	5437374	0.2	0.952	TRUE	1.75	1.63	1.9	5894935	0.6	0.9528	TRUE	1.77	1.68	1.89	1292157	0.1	0.9419	ALIGNED
sp|P02663|CASA2_BOVIN	KNTME	351.6300++	2	351.63	KNT[+80]ME								1.96	1.96	2.11	1627418	1.2	0.8316	ALIGNED								2.11	2.01	2.24	2906761	-0.5	0.9454	TRUE	2.18	2.1	2.27	4335872	-0.5	0.9364	TRUE
sp|P02663|CASA2_BOVIN	NTMEH	631.2504+	1	631.25	NTMEH	1.25	1.17	1.32	34933572	-0.6	0.9646	ALIGNED	1.26	1.17	1.33	49213044	-1.2	0.9554	TRUE	1.24	1.16	1.31	25924762	-1.1	0.9513	TRUE
sp|P02663|CASA2_BOVIN	NTMEH	316.1289++	2	316.129	NTMEH	1.25	1.17	1.32	19136118	-1.4	0.9458	ALIGNED	1.26	1.17	1.33	24359024	-1.7	0.9482	TRUE	1.24	1.16	1.31	9919816	-1.6	0.9507	TRUE								1.52	1.41	1.57	48939	-2.5	0.859	ALIGNED	1.54	1.41	1.58	26677	-1.3	0.9694	ALIGNED
sp|P02663|CASA2_BOVIN	TME	460.1149+	1	460.115	T[+80]ME																						1.91	1.85	2.05	851562	0.2	0.951	TRUE	1.96	1.9	2.08	1492142	-0.8	0.9414	ALIGNED
sp|P02663|CASA2_BOVIN	MEHVSSSEESIISQETYK	801.9429+++	3	801.943	MEHVS[+80]S[+80]S[+80]EESIIS[+80]QETYK																						11.64	11.53	11.77	473177	-0.1	0.9636	ALIGNED	11.52	11.42	11.7	3771284	-0.3	0.9862	TRUE	11.5	11.4	11.64	1269205	-1.2	0.9536	ALIGNED
sp|P02663|CASA2_BOVIN	MEHVSSSEES	681.1739++	2	681.174	MEHVS[+80]S[+80]S[+80]EES																						4.46	4.37	4.57	339248	-1.3	0.9666	ALIGNED	4.43	4.36	4.64	3039983	-1.5	0.9719	TRUE	4.43	4.37	4.56	230067	-0.1	0.9686	ALIGNED
sp|P02663|CASA2_BOVIN	EHVSSSEE	572.1377++	2	572.138	EHVS[+80]S[+80]S[+80]EE																						2.44	2.35	2.51	2791269	-0.6	0.9889	TRUE	2.46	2.38	2.55	7123416	-1	0.9906	TRUE	2.44	2.38	2.6	251551	-0.6	0.9541	ALIGNED
sp|P02663|CASA2_BOVIN	HVSSSEE	1014.2254+	1	1014.23	HVS[+80]S[+80]S[+80]EE																						1.29	1.15	1.53	1837865	2.1	0.997	ALIGNED	1.33	1.15	1.49	6221371	3.1	0.9923	TRUE
sp|P02663|CASA2_BOVIN	HVSSSEESIISQE	876.7582++	2	876.758	HVS[+80]S[+80]SEES[+80]IIS[+80]Q[+1]E																													9.78	9.53	10.82	27941890	0.5	0.976	TRUE
sp|P02663|CASA2_BOVIN	HVSSSEESIIS	707.7324++	2	707.732	HVS[+80]S[+80]S[+80]EESIIS																						9.33	9.22	9.56	9952418	0.6	0.9879	ALIGNED	9.24	9.12	9.42	15991452	2	0.9924	TRUE
sp|P02663|CASA2_BOVIN	HVSSSEES	551.1324++	2	551.132	HVS[+80]S[+80]S[+80]EES																						1.06	0.92	1.21	5540848	-0.6	0.9922	TRUE	1.14	1.07	1.22	10466984	-0.7	0.9922	TRUE
sp|P02663|CASA2_BOVIN	SIISQETYK	574.7654++	2	574.765	SIIS[+80]QETYK																						10.83	10.74	10.92	2445608	1.4	0.9907	ALIGNED	10.79	10.71	10.87	5476249	1.1	0.992	TRUE	10.77	10.66	10.84	1615572	0.6	0.9865	ALIGNED
sp|P02663|CASA2_BOVIN	IISQETYK	531.2494++	2	531.249	IIS[+80]QETYK																						8.43	8.36	8.54	2306578	0.4	0.9862	TRUE	8.42	8.32	8.51	5126575	0.6	0.9923	TRUE	8.41	8.32	8.49	1290033	0.6	0.9783	ALIGNED
sp|P02663|CASA2_BOVIN	IIS	332.2180+	1	332.218	IIS	4.44	4.39	4.53	53642264	-0.7	0.9839	ALIGNED	4.42	4.38	4.53	54806680	-1.3	0.9826	ALIGNED	4.44	4.4	4.55	65120920	-1	0.9855	ALIGNED	4.5	4.42	4.61	1679774	-1.2	0.9727	TRUE	4.58	4.51	4.67	2488059	-1.5	0.9715	ALIGNED	4.59	4.53	4.66	120831	-1.3	0.9072	ALIGNED
sp|P02663|CASA2_BOVIN	IIS	412.1843+	1	412.184	IIS[+80]																						4.48	4.41	4.59	1258454	-0.9	0.9725	TRUE	4.52	4.45	4.64	4790517	-0.6	0.9798	TRUE	4.52	4.44	4.6	449526	-0.5	0.9754	ALIGNED
sp|P02663|CASA2_BOVIN	IISQ	460.2766+	1	460.277	IISQ	4.27	4.16	4.37	5780487	-0.1	0.9474	ALIGNED	4.26	4.13	4.4	5630395	-0.7	0.929	ALIGNED	4.2	4.13	4.35	4274801	-1.1	0.867	ALIGNED	4.32	4.25	4.43	794479	-0.4	0.942	TRUE	4.37	4.31	4.49	1609790	-1.1	0.959	ALIGNED	4.38	4.33	4.52	94491	-0.8	0.8821	ALIGNED
sp|P02663|CASA2_BOVIN	IISQET	771.3172+	1	771.317	IIS[+80]Q[+1]ET																						7.63	7.56	7.73	1260380	1.1	0.9856	ALIGNED	7.6	7.53	7.71	6899002	-1.1	0.9844	TRUE
sp|P02663|CASA2_BOVIN	IISQETY	934.3805+	1	934.381	IIS[+80]Q[+1]ETY																						10.38	10.31	10.49	3339289	1.2	0.9902	TRUE	10.32	10.24	10.45	8135625	0.4	0.9935	TRUE	10.31	10.25	10.4	513059	0.1	0.9758	ALIGNED
sp|P02663|CASA2_BOVIN	IISQETY	467.6939++	2	467.694	IIS[+80]Q[+1]ETY																						10.38	10.31	10.49	4953413	0.5	0.9953	TRUE	10.32	10.24	10.45	9429633	-0.1	0.9912	TRUE	10.31	10.25	10.4	674345	0.3	0.944	ALIGNED
sp|P02663|CASA2_BOVIN	IISQETY	933.3965+	1	933.397	IIS[+80]QETY																						9.97	9.9	10.1	4459718	1.2	0.9894	TRUE	9.93	9.85	10.02	11071829	0.2	0.9963	TRUE	9.91	9.85	10.03	3349356	0.2	0.9854	TRUE
sp|P02663|CASA2_BOVIN	IISQETY	467.2019++	2	467.202	IIS[+80]QETY																						9.97	9.9	10.1	11136273	0.4	0.9949	TRUE	9.93	9.85	10.02	18757182	0.1	0.9924	TRUE	9.91	9.85	10.03	6008823	-0.3	0.9952	TRUE
sp|P02663|CASA2_BOVIN	IISQETYK	531.7414++	2	531.741	IIS[+80]Q[+1]ETYK																						8.89	8.82	8.98	1134875	1.5	0.993	ALIGNED	8.87	8.78	9.03	3659529	0.8	0.9877	TRUE	8.86	8.74	9.02	130075	-0.1	0.9093	ALIGNED
sp|P02663|CASA2_BOVIN	QETY	541.2140+	1	541.214	Q[+1]ETY	4.58	4.5	4.6	705346	-2.1	0.8651	ALIGNED	4.54	4.52	4.59	876534	-2.8	0.865	ALIGNED	4.58	4.54	4.65	780390	-2.9	0.8542	ALIGNED	4.62	4.49	4.73	9214300	-4.8	0.9792	TRUE
sp|P02663|CASA2_BOVIN	KQEK	532.3089+	1	532.309	KQEK	0.54	0.49	0.57	1909004	-0.2	0.8679	ALIGNED	0.43	0.39	0.49	13168188	1.7	0.9782	TRUE	0.43	0.38	0.49	16590273	1.2	0.9825	TRUE
sp|P02663|CASA2_BOVIN	NMAINPS	747.3342+	1	747.334	N[+1]MAINPS	8.62	8.52	8.73	21661006	-0.1	0.9525	ALIGNED	8.62	8.52	8.7	29411536	-0.5	0.9645	TRUE	8.61	8.53	8.76	9776580	-0.1	0.9499	ALIGNED
sp|P02663|CASA2_BOVIN	NMAINPSK	874.4451+	1	874.445	NMAINPSK	6.85	6.72	6.96	100011560	-0.4	0.9793	TRUE	6.86	6.72	6.94	58320556	-0.7	0.9742	TRUE	6.84	6.73	6.94	7946731	-0.6	0.97	TRUE
sp|P02663|CASA2_BOVIN	NMAINPSK	437.7262++	2	437.726	NMAINPSK	6.85	6.72	6.96	242547680	-0.3	0.9668	TRUE	6.84	6.72	6.94	130340880	-0.6	0.9627	TRUE	6.84	6.73	6.94	20342116	-0.1	0.9603	TRUE
sp|P02663|CASA2_BOVIN	NMAINPS	746.3502+	1	746.35	NMAINPS	8.25	8.16	8.38	736697088	-1.3	0.9734	TRUE	8.25	8.16	8.37	1214602752	-1.6	0.9761	TRUE	8.28	8.18	8.4	480185472	-1	0.9743	TRUE								8.36	8.29	8.44	270663	0.7	0.8011	ALIGNED	8.36	8.3	8.42	110572	0.8	0.9093	ALIGNED
sp|P02663|CASA2_BOVIN	NMAINPS	373.6787++	2	373.679	NMAINPS	8.25	8.16	8.38	82341512	-0.6	0.9477	TRUE	8.25	8.16	8.37	119491032	-1	0.9509	TRUE	8.27	8.18	8.4	55732328	-0.4	0.9503	TRUE															8.33	8.3	8.42	53990	1.4	0.8053	ALIGNED
sp|P02663|CASA2_BOVIN	NMAINPS	762.3451+	1	762.345	NM[+16]AINPS	5.45	5.37	5.56	56034708	0	0.9623	TRUE	5.44	5.35	5.56	68398280	-0.7	0.9639	TRUE	5.5	5.35	5.59	40424536	-0.1	0.9582	TRUE
sp|P02663|CASA2_BOVIN	NMAINPS	381.6762++	2	381.676	NM[+16]AINPS	5.45	5.37	5.56	23146194	2.1	0.829	TRUE	5.44	5.35	5.56	24800036	0.8	0.8488	TRUE	5.45	5.35	5.59	12486175	-0.2	0.9439	TRUE
sp|P02663|CASA2_BOVIN	NMAINPSK	477.7094++	2	477.709	NMAINPS[+80]K	6.99	6.89	7.09	18748760	-0.6	0.9522	TRUE	6.97	6.87	7.07	24016918	-0.8	0.9729	ALIGNED	6.99	6.88	7.14	9013128	-0.4	0.9234	ALIGNED
sp|P02663|CASA2_BOVIN	NMAINPSKENL	655.7942++	2	655.794	NMAINPS[+80]KENL	11.6	11.46	11.7	82169120	0.2	0.9865	TRUE	11.61	11.44	11.69	122317928	-0.2	0.9923	TRUE	11.54	11.32	11.66	69696832	0.4	0.979	TRUE
sp|P02663|CASA2_BOVIN	MAINPS	632.3072+	1	632.307	MAINPS	7.91	7.83	8.01	55694888	-0.5	0.9649	TRUE	7.89	7.82	7.99	90314472	-0.9	0.9573	TRUE	7.92	7.83	8.02	41470272	-0.4	0.9638	TRUE								7.93	7.87	8.02	285722	1	0.8046	ALIGNED
sp|P02663|CASA2_BOVIN	AINPSKENL	493.2693++	2	493.269	AINPSKENL	8.49	8.39	8.62	137530992	-0.4	0.879	TRUE	8.49	8.39	8.69	158406160	-0.8	0.8706	TRUE	8.5	8.39	8.63	87930752	-0.6	0.947	TRUE								8.54	8.45	8.63	744247	0.4	0.8267	ALIGNED	8.54	8.43	8.63	4147712	0.2	0.9248	ALIGNED
sp|P02663|CASA2_BOVIN	AINPSKE	379.7058++	2	379.706	AINPSKE	4.16	4.05	4.24	24734464	-1	0.9662	ALIGNED	4.14	4.02	4.24	29713108	-1.2	0.9617	TRUE	4.16	4.02	4.24	22746516	-1.3	0.9566	TRUE	4.23	4.09	4.36	1709329	-0.1	0.9818	TRUE	4.29	4.14	4.43	8465494	-1.6	0.9806	TRUE	4.27	4.17	4.42	3183753	-1.1	0.9889	TRUE
sp|P02663|CASA2_BOVIN	AINPSKE	419.6890++	2	419.689	AINPS[+80]KE	4.52	4.42	4.62	10660206	-3.2	0.9198	ALIGNED	4.51	4.4	4.63	15781191	-3.1	0.9831	ALIGNED	4.54	4.44	4.65	10358346	-3.4	0.9202	ALIGNED	4.56	4.45	4.67	2065873	-0.3	0.9878	ALIGNED	4.59	4.44	4.69	9918714	-1	0.9922	TRUE	4.59	4.48	4.67	975871	-1	0.9744	ALIGNED
sp|P02663|CASA2_BOVIN	AINPSKENL	533.2524++	2	533.252	AINPS[+80]KENL	8.9	8.76	9	84020224	-0.6	0.984	TRUE	8.89	8.79	8.98	132588560	-0.9	0.9902	TRUE	8.89	8.82	9	98378864	-0.6	0.9837	TRUE	8.94	8.82	9.03	402374	1.2	0.988	ALIGNED	8.91	8.75	9.03	2342964	1.2	0.985	ALIGNED	8.91	8.74	9.01	1437946	-0.7	0.9848	ALIGNED
sp|P02663|CASA2_BOVIN	AINPSKEN	476.7104++	2	476.71	AINPS[+80]KEN	3.92	3.84	4.01	4178229	4.4	0.9337	ALIGNED								3.94	3.81	4.01	11448822	1.4	0.9663	ALIGNED	3.94	3.81	4.1	1274280	0.4	0.9772	ALIGNED	3.97	3.75	4.13	10220661	0.1	0.9898	TRUE	3.98	3.86	4.11	1202133	0.4	0.9981	ALIGNED
sp|P02663|CASA2_BOVIN	AINPSK	629.3617+	1	629.362	AINPSK	2.98	2.82	3.13	100076792	0.1	0.9872	TRUE	2.97	2.81	3.11	62091800	-0.7	0.9885	TRUE	2.99	2.83	3.11	14099749	-0.3	0.9649	TRUE	3.05	2.91	3.19	123648	0.7	0.8484	ALIGNED	3.16	2.99	3.26	1684477	0.2	0.9853	ALIGNED
sp|P02663|CASA2_BOVIN	AINPSK	315.1845++	2	315.184	AINPSK	2.98	2.82	3.13	141621296	-0.2	0.9521	TRUE	2.97	2.81	3.11	86357848	-0.9	0.9398	TRUE	2.97	2.83	3.11	28171368	-0.8	0.8204	TRUE	3.07	2.91	3.19	889384	-0.1	0.8238	ALIGNED	3.16	2.99	3.26	3600081	-2	0.9664	ALIGNED	3.17	3.17	3.27	174857	-0.6	0.845	ALIGNED
sp|P02663|CASA2_BOVIN	INPSK	279.6659++	2	279.666	INPSK	1.89	1.78	2.03	13882830	-1	0.9655	ALIGNED	1.88	1.76	2.01	7526684	-1.3	0.9343	ALIGNED								1.97	1.74	2.08	949560	0.2	0.9706	TRUE	2.06	1.94	2.18	2262514	-0.7	0.9751	TRUE	2.07	1.96	2.18	104574	0.1	0.8596	ALIGNED
sp|P02663|CASA2_BOVIN	INPSKE	384.1704++	2	384.17	INPS[+80]KE	3.53	3.44	3.63	14075750	-0.1	0.9913	ALIGNED	3.52	3.44	3.6	10155101	-0.5	0.9821	TRUE	3.54	3.44	3.61	1259180	-0.7	0.9066	ALIGNED	3.57	3.5	3.68	8162937	-0.2	0.9904	TRUE	3.61	3.55	3.7	17942162	-1.2	0.9919	TRUE	3.62	3.56	3.67	313987	0.1	0.9722	ALIGNED
sp|P02663|CASA2_BOVIN	NPSK	445.2405+	1	445.241	NPSK								2.97	2.8	3.05	43931072	-0.9	0.9241	TRUE																						3.15	3.02	3.29	194849	0	0.8824	ALIGNED
sp|P02663|CASA2_BOVIN	NPSKE	287.6452++	2	287.645	NPSKE															0.69	0.6	0.72	1183550	3.3	0.8068	ALIGNED	0.69	0.63	0.76	2122866	-0.7	0.9693	TRUE	0.82	0.68	0.86	2182823	2.5	0.8116	ALIGNED
sp|P02663|CASA2_BOVIN	KEVV	474.2922+	1	474.292	KEVV	3.67	3.6	3.83	21807584	0	0.9765	TRUE	3.66	3.58	3.79	25040540	-0.8	0.9652	ALIGNED	3.68	3.63	3.83	10277894	-0.3	0.9551	ALIGNED								3.88	3.82	3.98	598308	-0.9	0.9545	ALIGNED	3.89	3.81	4	332583	-0.5	0.9243	ALIGNED
sp|P02663|CASA2_BOVIN	EVVRN	308.6743++	2	308.674	EVVRN	1.92	1.8	2.02	5255548	-2.6	0.9346	ALIGNED															1.99	1.9	2.12	1085091	0.1	0.9679	ALIGNED	2.09	1.96	2.23	4231222	-0.8	0.9681	TRUE	2.1	1.99	2.22	427210	0	0.9876	ALIGNED
sp|P02663|CASA2_BOVIN	EVVR	251.6528++	2	251.653	EVVR																						2.29	2.18	2.45	1573448	1.4	0.9742	ALIGNED	2.37	2.19	2.48	14181890	1.3	0.9734	TRUE	2.38	2.31	2.53	1035690	1.4	0.9621	ALIGNED
sp|P02663|CASA2_BOVIN	VVRNANE	401.2143++	2	401.214	VVRNANE																						1.97	1.86	2.08	670128	0.5	0.9675	TRUE	2.06	2	2.17	907229	-0.7	0.9627	ALIGNED	2.05	1.96	2.14	36808	0.4	0.8123	ALIGNED
sp|P02663|CASA2_BOVIN	NANEEE	706.2526+	1	706.253	N[+1]ANEEE	1.66	1.59	1.81	12196282	-0.3	0.9815	TRUE	1.65	1.56	1.85	14136354	-0.7	0.9757	TRUE	1.65	1.58	1.87	13558803	-0.8	0.9748	TRUE
sp|P02663|CASA2_BOVIN	NANEEEY	868.3319+	1	868.332	NANEEEY	5.45	5.37	5.55	490232000	0.3	0.994	TRUE	5.43	5.36	5.56	494250112	-0.3	0.9944	TRUE	5.46	5.39	5.57	44193456	0.8	0.9903	TRUE								5.5	5.43	5.61	3362229	0.3	0.9566	ALIGNED
sp|P02663|CASA2_BOVIN	NANEEEY	434.6696++	2	434.67	NANEEEY	5.45	5.37	5.55	189100336	0.3	0.992	TRUE	5.45	5.36	5.56	182886304	-0.3	0.9919	TRUE	5.46	5.39	5.57	19200556	1	0.9903	TRUE								5.5	5.43	5.61	2257435	0.2	0.9712	ALIGNED
sp|P02663|CASA2_BOVIN	NANEEE	705.2686+	1	705.269	NANEEE	1.13	1.09	1.36	376414656	-1.1	0.9903	TRUE	1.14	1.07	1.34	374948096	-1.3	0.9878	TRUE	1.13	1.09	1.36	399536064	-0.9	0.9899	TRUE	1.22	1.17	1.4	2273325	1.2	0.9872	ALIGNED	1.18	1.13	1.39	12028880	-0.2	0.9856	TRUE	1.29	1.24	1.38	192645	0.7	0.8444	ALIGNED
sp|P02663|CASA2_BOVIN	ANEEEY	754.2890+	1	754.289	ANEEEY	5.26	5.19	5.35	8290750	-1.2	0.9653	ALIGNED	5.24	5.19	5.33	8670370	-1.6	0.9526	TRUE	5.26	5.24	5.31	376305	-2	0.8251	ALIGNED	5.32	5.23	5.44	1656428	0.3	0.9875	ALIGNED	5.33	5.25	5.45	13785683	-1.1	0.9947	TRUE	5.34	5.26	5.45	4718160	-1.6	0.9797	ALIGNED
sp|P02663|CASA2_BOVIN	EEY	440.1664+	1	440.166	EEY	3.92	3.85	4.02	129317352	0	0.9777	ALIGNED	3.9	3.83	4	150715856	-0.4	0.9801	ALIGNED	3.94	3.84	4.02	11016877	-0.5	0.938	ALIGNED	3.97	3.9	4.06	163932	0.6	0.8784	ALIGNED	4.02	3.95	4.13	3621471	-0.8	0.9816	TRUE	4.03	3.96	4.12	293217	-0.6	0.9527	ALIGNED
sp|P02663|CASA2_BOVIN	TEEVK	303.1607++	2	303.161	TEEVK	1.53	1.32	1.63	11647211	-3.3	0.9606	TRUE	1.5	1.38	1.6	3150517	-3.4	0.8115	ALIGNED
sp|P02663|CASA2_BOVIN	EVK	375.2238+	1	375.224	EVK	0.82	0.77	0.94	323246048	-1.2	0.9791	ALIGNED	0.66	0.55	0.73	41074476	-1.9	0.9726	ALIGNED	0.66	0.56	0.74	32946550	-1.8	0.9753	TRUE								1.03	0.9	1.11	1926402	-1.9	0.969	ALIGNED	0.85	0.82	1.07	8922052	-1.6	0.9746	ALIGNED
sp|P02663|CASA2_BOVIN	VKITVDDKH	527.7982++	2	527.798	VKITVDDKH	5.91	5.81	5.97	5997932	-1	0.9634	TRUE	5.9	5.8	5.97	3751984	-2.6	0.921	ALIGNED	5.9	5.83	6	12150064	-0.9	0.9807	TRUE
sp|P02663|CASA2_BOVIN	VKITVDDKH	264.4027++++	4	264.403	VKITVDDKH	5.9	5.81	5.97	15157265	-0.7	0.9678	TRUE	5.91	5.8	5.97	10367460	-1.2	0.9864	ALIGNED	5.9	5.83	6	34318912	-0.9	0.978	TRUE
sp|P02663|CASA2_BOVIN	VKITVDDK	917.5302+	1	917.53	VKITVDDK	6.84	6.74	6.93	19452698	-0.8	0.9799	TRUE	6.84	6.75	6.93	17436164	-1.1	0.9866	TRUE	6.84	6.76	6.94	10768427	-1.7	0.9689	TRUE
sp|P02663|CASA2_BOVIN	VKITVDDK	459.2687++	2	459.269	VKITVDDK	6.84	6.74	6.93	137220080	-0.5	0.9926	TRUE	6.83	6.75	6.93	109602752	-0.9	0.9785	TRUE	6.84	6.76	6.94	85327184	-0.7	0.9765	TRUE
sp|P02663|CASA2_BOVIN	VKITVDDK	306.5149+++	3	306.515	VKITVDDK	6.84	6.74	6.93	257658272	-0.6	0.9933	TRUE	6.83	6.75	6.93	204290416	-1.1	0.9936	TRUE	6.84	6.76	6.94	169552640	-0.8	0.9929	TRUE								6.94	6.89	6.95	15086	0.1	0.8033	ALIGNED
sp|P02663|CASA2_BOVIN	KIT	361.2445+	1	361.245	KIT	4.58	4.49	4.69	10354589	-1.6	0.9592	ALIGNED	4.55	4.48	4.69	10364015	-1.8	0.9004	ALIGNED	4.59	4.48	4.77	17438248	-1.4	0.9017	ALIGNED								4.6	4.44	4.75	4544320	-1.5	0.966	TRUE	4.62	4.56	4.73	326447	-1.1	0.8955	ALIGNED
sp|P02663|CASA2_BOVIN	KITV	460.3130+	1	460.313	KITV	6.56	6.43	6.67	32142766	0.4	0.9713	TRUE	6.55	6.44	6.68	33174348	-0.4	0.9795	TRUE	6.57	6.46	6.7	57108448	-0.3	0.9788	TRUE
sp|P02663|CASA2_BOVIN	KITVDDK	818.4618+	1	818.462	KITVDDK	4.23	4.14	4.34	83368496	-0.4	0.9885	TRUE	4.19	4.13	4.33	76026080	-0.5	0.9868	TRUE	4.2	4.14	4.37	77825344	-0.5	0.9915	TRUE
sp|P02663|CASA2_BOVIN	KITVDDK	409.7345++	2	409.735	KITVDDK	4.21	4.14	4.34	569110144	-0.6	0.9935	TRUE	4.21	4.13	4.33	504264480	-0.8	0.9942	TRUE	4.2	4.14	4.37	514226016	-0.5	0.9941	TRUE
sp|P02663|CASA2_BOVIN	KITVDDK	273.4921+++	3	273.492	KITVDDK	4.21	4.14	4.34	258044832	-0.2	0.9927	TRUE	4.21	4.13	4.33	222426224	-0.4	0.9901	TRUE	4.2	4.14	4.37	235433488	0.2	0.9871	TRUE
sp|P02663|CASA2_BOVIN	KITVDDKH	478.2640++	2	478.264	KITVDDKH	3.54	3.46	3.63	20130392	1	0.9598	ALIGNED	3.53	3.45	3.59	15903628	0.4	0.976	TRUE	3.54	3.47	3.63	68241992	0.3	0.9886	TRUE
sp|P02663|CASA2_BOVIN	KITVDDKH	319.1784+++	3	319.178	KITVDDKH	3.54	3.46	3.63	45421064	-0.3	0.9854	ALIGNED	3.52	3.45	3.59	33886612	-0.9	0.9822	TRUE	3.54	3.47	3.63	166544064	-1.2	0.9905	TRUE
sp|P02663|CASA2_BOVIN	KITVDDKH	239.6356++++	4	239.636	KITVDDKH	3.54	3.46	3.63	9258492	1.4	0.9272	ALIGNED	3.52	3.45	3.59	6338106	0.8	0.944	TRUE	3.54	3.47	3.63	28666952	0.3	0.9601	TRUE
sp|P02663|CASA2_BOVIN	ITVDDKH	827.4258+	1	827.426	ITVDDKH	4.23	4.09	4.35	23132100	-0.3	0.984	TRUE	4.21	4.15	4.31	21375866	-0.4	0.9929	TRUE	4.23	4.12	4.35	53213056	-0.2	0.9909	TRUE
sp|P02663|CASA2_BOVIN	ITVDDKH	414.2165++	2	414.217	ITVDDKH	4.22	4.09	4.35	237462448	-1.1	0.996	TRUE	4.21	4.15	4.31	200175216	-1.3	0.9941	TRUE	4.23	4.12	4.35	540438656	-1	0.9967	TRUE
sp|P02663|CASA2_BOVIN	ITVDDKH	276.4801+++	3	276.48	ITVDDKH	4.22	4.09	4.35	371013792	-0.9	0.9908	TRUE	4.21	4.15	4.31	307377344	-1	0.9903	TRUE	4.23	4.12	4.35	855219456	-0.6	0.9944	TRUE								4.35	4.33	4.47	144942	-1.8	0.8129	ALIGNED	4.37	4.28	4.49	261651	-0.8	0.9741	ALIGNED
sp|P02663|CASA2_BOVIN	ITVDD	562.2719+	1	562.272	ITVDD	6.64	6.57	6.72	59258540	0.2	0.9154	TRUE	6.63	6.41	6.72	109538264	-0.7	0.9336	TRUE	6.64	6.59	6.76	236970608	0	0.982	TRUE	6.65	6.6	6.76	1065962	-0.7	0.9707	ALIGNED	6.69	6.62	6.78	17972656	-1.9	0.9578	ALIGNED	6.71	6.61	6.8	8191037	-1.4	0.9868	ALIGNED
sp|P02663|CASA2_BOVIN	ITVDDK	690.3668+	1	690.367	ITVDDK	5.12	5.03	5.24	1174592640	-0.9	0.9947	TRUE	5.11	5.03	5.22	1229740800	-1.7	0.9911	TRUE	5.12	5.07	5.24	710608448	-1.2	0.9921	TRUE								5.21	5.09	5.37	299997	-2.6	0.8169	ALIGNED
sp|P02663|CASA2_BOVIN	ITVDDK	345.6871++	2	345.687	ITVDDK	5.12	5.03	5.24	3741838336	-0.6	0.9941	TRUE	5.11	5.03	5.22	3963523072	-1.4	0.9939	TRUE	5.12	5.07	5.24	2794383360	-1.4	0.9953	TRUE	5.19	5.12	5.32	181545	-0.4	0.9498	ALIGNED	5.21	5.09	5.37	1469032	-1.2	0.9622	ALIGNED	5.21	5.16	5.31	559455	-1.7	0.9828	ALIGNED
sp|P02663|CASA2_BOVIN	ITVDDKHY	330.8345+++	3	330.835	ITVDDKHY	7.2	7.12	7.29	74361240	-1.1	0.9903	TRUE	7.2	7.11	7.28	60600760	-1.6	0.9848	TRUE	7.21	7.12	7.28	12884540	-0.6	0.9982	ALIGNED								7.26	7.15	7.35	389104	-1.6	0.9178	ALIGNED	7.26	7.15	7.38	1105811	-2	0.9663	ALIGNED
sp|P02663|CASA2_BOVIN	ITVDDKHYQ	559.7775++	2	559.777	ITVDDKHYQ	6.68	6.62	6.75	88163192	0.2	0.994	TRUE	6.67	6.61	6.77	92604760	-0.7	0.9957	TRUE	6.7	6.44	6.77	20309298	2.1	0.9841	TRUE	6.72	6.69	6.85	50358	4.1	0.8082	ALIGNED	6.74	6.68	6.84	208563	-3.7	0.8242	ALIGNED	6.75	6.66	6.89	301993	0.1	0.989	ALIGNED
sp|P02663|CASA2_BOVIN	ITVDDKHYQ	373.5207+++	3	373.521	ITVDDKHYQ	6.68	6.62	6.75	216179824	-0.5	0.9963	TRUE	6.67	6.61	6.77	230289776	-1	0.9916	TRUE								6.74	6.69	6.85	156472	2.4	0.9132	ALIGNED	6.74	6.68	6.84	750409	-1.6	0.9735	ALIGNED	6.75	6.66	6.89	1273594	-0.8	0.9451	ALIGNED
sp|P02663|CASA2_BOVIN	TVDDK	577.2828+	1	577.283	TVDDK	5.11	5.04	5.24	1459071104	-0.5	0.9909	TRUE	5.11	5.03	5.22	1453920128	-1.4	0.9919	TRUE	5.14	5.07	5.24	1049434496	-0.9	0.9902	TRUE
sp|P02663|CASA2_BOVIN	TVDDKHYQ	503.2354++	2	503.235	TVDDKHYQ	6.68	6.62	6.78	74858664	0.8	0.9933	TRUE	6.67	6.6	6.77	77212896	0.1	0.9891	ALIGNED	6.7	6.63	6.78	20639208	1.2	0.9424	ALIGNED								6.75	6.68	6.86	257001	0.7	0.8806	ALIGNED	6.75	6.7	6.86	381003	0.1	0.9334	ALIGNED
sp|P02663|CASA2_BOVIN	TVDDKH	357.6745++	2	357.674	TVDDKH	4.23	4.08	4.35	91540128	-0.8	0.9879	TRUE	4.2	4.15	4.35	86739440	-0.7	0.9932	TRUE	4.25	4.12	4.36	221304544	-0.8	0.9855	TRUE
sp|P02663|CASA2_BOVIN	VDDKH	613.2940+	1	613.294	VDDKH															4.24	4.18	4.32	37405856	0.1	0.9904	TRUE
sp|P02663|CASA2_BOVIN	VDDKHYQ	302.1435+++	3	302.143	VDDKHYQ	2.71	2.57	2.83	2588121	-0.5	0.9357	ALIGNED															2.88	2.76	3.03	1262651	1.9	0.9562	ALIGNED	2.91	2.83	3	2977347	-1.2	0.9958	TRUE	2.92	2.83	3.1	2590182	-0.9	0.9881	ALIGNED
sp|P02663|CASA2_BOVIN	VDDK	476.2351+	1	476.235	VDDK	5.12	5.03	5.23	670081920	-0.2	0.9834	TRUE	5.11	5.03	5.22	657175040	-0.9	0.985	TRUE	5.13	5.06	5.24	465977536	-0.4	0.981	TRUE								5.21	5.1	5.31	322969	-0.8	0.9758	ALIGNED
sp|P02663|CASA2_BOVIN	DDK	377.1667+	1	377.167	DDK	4.21	4.16	4.34	270582080	-0.8	0.9796	TRUE	4.2	4.13	4.33	242436448	-0.9	0.9801	TRUE	4.21	4.14	4.35	252171024	-0.5	0.9768	TRUE
sp|P02663|CASA2_BOVIN	DDKH	514.2256+	1	514.226	DDKH	4.22	4.09	4.35	71636792	0.1	0.9818	ALIGNED	4.21	4.16	4.32	61851716	-0.1	0.984	ALIGNED	4.25	4.12	4.37	163140256	0.2	0.9818	TRUE
sp|P02663|CASA2_BOVIN	DDKHY	339.1481++	2	339.148	DDKHY																						1.65	1.54	1.76	172559	0.1	0.9916	ALIGNED	1.7	1.57	1.81	3140881	0.4	0.9933	TRUE	1.69	1.64	1.8	178004	0.1	0.9554	ALIGNED
sp|P02663|CASA2_BOVIN	HYQ	224.1030++	2	224.103	HYQ	0.9	0.86	0.97	22087770	-1.3	0.9695	TRUE
sp|P02663|CASA2_BOVIN	KAL	331.2340+	1	331.234	KAL	1.82	1.65	1.91	11067606	-0.4	0.9088	ALIGNED	1.8	1.66	1.91	10162914	-0.2	0.9085	ALIGNED	1.81	1.62	1.91	6547163	0.4	0.9072	ALIGNED								1.99	1.91	2.1	310671	0.4	0.9964	ALIGNED	1.99	1.92	2.14	773958	0.7	0.9722	TRUE
sp|P02663|CASA2_BOVIN	KALNEINQF	538.7904++	2	538.79	KALNEINQF	11.6	11.54	11.69	1453444	3.4	0.9076	ALIGNED	11.59	11.56	11.62	508171	2.4	0.8998	ALIGNED															11.66	11.6	11.88	1376194	0.7	0.9836	ALIGNED	11.64	11.5	11.82	11379786	-0.6	0.9942	TRUE
sp|P02663|CASA2_BOVIN	ALNEINQ	801.4101+	1	801.41	ALNEINQ															7.49	7.41	7.56	69932448	-1	0.9979	TRUE
sp|P02663|CASA2_BOVIN	ALNEINQ	401.2087++	2	401.209	ALNEINQ	7.5	7.41	7.6	135745360	0.2	0.8694	TRUE	7.49	7.28	7.52	81958272	-0.2	0.9487	TRUE	7.49	7.41	7.56	37072588	0	0.9485	TRUE															7.77	7.61	7.87	13357586	2.3	0.8183	ALIGNED
sp|P02663|CASA2_BOVIN	LNEINQ	730.3730+	1	730.373	LNEINQ	6.26	6.19	6.34	35220032	-0.2	0.9926	TRUE	6.25	6.18	6.33	36387372	-0.6	0.9904	TRUE	6.26	6.19	6.34	27148160	-0.2	0.9859	ALIGNED								6.28	6.23	6.35	167726	0.8	0.9176	ALIGNED	6.31	6.31	6.49	134899	0.1	0.9288	ALIGNED
sp|P02663|CASA2_BOVIN	LNEINQF	877.4414+	1	877.441	LNEINQF																													12.42	12.35	12.5	382017	3.1	0.974	ALIGNED	12.39	12.24	12.5	4924215	1.1	0.9946	TRUE
sp|P02663|CASA2_BOVIN	NEINQ	617.2889+	1	617.289	NEINQ															3.36	3.31	3.5	315527712	-3.1	0.8905	ALIGNED								3.46	3.4	3.63	1720946	2.5	0.9523	ALIGNED
sp|P02663|CASA2_BOVIN	NEINQF	382.6823++	2	382.682	NEINQF																						10.51	10.35	10.64	955459	-0.1	0.9716	ALIGNED	10.5	10.41	10.63	6828345	0.3	0.9909	ALIGNED	10.49	10.4	10.63	25168902	-0.3	0.988	TRUE
sp|P02663|CASA2_BOVIN	INQ	374.2034+	1	374.203	INQ	1.15	1.06	1.34	91026160	-1	0.9739	ALIGNED	1.16	1.06	1.33	101515648	-1.3	0.9759	TRUE	1.14	1.07	1.32	102196024	-1.1	0.9737	TRUE
sp|P02663|CASA2_BOVIN	INQ	375.1874+	1	375.187	IN[+1]Q	1.55	1.51	1.75	13218501	-0.4	0.9725	ALIGNED	1.56	1.5	1.7	13479348	-1	0.9695	TRUE	1.57	1.33	1.75	53675016	-0.7	0.9808	ALIGNED	1.84	1.75	1.97	1489267	0.6	0.9584	ALIGNED	1.6	1.38	1.76	1889020	-0.5	0.9624	ALIGNED	1.92	1.85	2.05	2376363	0.1	0.9569	ALIGNED
sp|P02663|CASA2_BOVIN	YQKFPQY	487.2425++	2	487.243	YQKFPQY																						10.37	10.19	10.75	2375441	3.4	0.811	ALIGNED	10.43	10.27	11.04	5673362	2	0.841	ALIGNED	10.4	10.23	10.69	68301952	-0.3	0.9961	TRUE
sp|P02663|CASA2_BOVIN	YQKFPQ	810.4145+	1	810.414	YQKFPQ	7.38	7.18	7.73	498422912	-0.6	0.9893	TRUE	7.37	7.17	7.72	497449120	-1	0.9924	TRUE	7.4	7.18	7.73	409602688	-0.9	0.9951	TRUE															7.38	7.15	7.81	1743742	-0.8	0.9298	TRUE
sp|P02663|CASA2_BOVIN	YQKFPQ	405.7109++	2	405.711	YQKFPQ	7.38	7.18	7.73	3035044352	-0.5	0.993	TRUE	7.37	7.17	7.72	2814103296	-0.9	0.9929	TRUE	7.4	7.18	7.73	2534332928	-0.8	0.9911	TRUE								7.42	7.15	7.49	3986933	-0.8	0.9949	ALIGNED	7.43	7.15	7.81	21831296	-1	0.9813	TRUE
sp|P02663|CASA2_BOVIN	QKFPQ	647.3511+	1	647.351	QKFPQ	5.63	5.39	5.89	235900576	0.5	0.9858	TRUE	5.59	5.39	5.87	204760656	0	0.9872	TRUE	5.64	5.42	5.93	244573520	0.3	0.9885	TRUE
sp|P02663|CASA2_BOVIN	KFPQ	519.2926+	1	519.293	KFPQ	5.38	5.18	5.55	65481752	0.2	0.9927	TRUE	5.33	4.97	5.52	122150896	0.2	0.9867	TRUE	5.33	4.99	5.88	210033408	0.4	0.9833	TRUE								5.77	5.61	6	496798	0.8	0.8854	ALIGNED	5.4	5.09	5.73	918264	-3.3	0.8885	ALIGNED
sp|P02663|CASA2_BOVIN	KFPQ	260.1499++	2	260.15	KFPQ	5.29	5.18	5.55	46528648	-0.3	0.9906	TRUE	5.24	4.97	5.52	59556796	-0.7	0.9618	TRUE	5.29	4.99	5.88	124112200	-0.1	0.9626	TRUE															5.4	5.09	5.73	1304141	-1.3	0.9263	ALIGNED
sp|P02663|CASA2_BOVIN	PQYL	520.2766+	1	520.277	PQYL	9.84	9.68	9.97	50410928	0.3	0.9791	ALIGNED	9.83	9.67	9.93	49205968	0.1	0.9822	ALIGNED								9.89	9.8	9.98	2314484	-1.1	0.9607	TRUE	9.92	9.83	10.03	7897877	-0.4	0.9763	ALIGNED
sp|P02663|CASA2_BOVIN	YLQY	293.6472++	2	293.647	YLQY																													10	9.95	10.1	226392	0.8	0.9512	ALIGNED	10	9.91	10.13	2180796	-0.1	0.9805	TRUE
sp|P02663|CASA2_BOVIN	YLYQG	644.2926+	1	644.293	YLYQ[+1]G								5.32	5.21	5.42	104094128	-0.7	0.9891	ALIGNED	5.34	5.25	5.45	51164656	-0.4	0.9924	TRUE
sp|P02663|CASA2_BOVIN	LYQGPIV	789.4505+	1	789.451	LYQGPIV	13.42	12.37	13.8	493796640	0.2	0.9897	TRUE	13.4	13.28	13.54	361896512	-0.1	0.9955	TRUE	13.35	13.25	13.5	178045440	0.8	0.992	TRUE
sp|P02663|CASA2_BOVIN	LYQGPIV	395.2289++	2	395.229	LYQGPIV								13.4	13.28	13.54	201971504	0.1	0.9906	TRUE	13.35	13.25	13.5	111763032	1.1	0.9879	TRUE
sp|P02663|CASA2_BOVIN	LYQGPIVLNPW	650.3584++	2	650.358	LYQGPIVLNPW	19.98	19.86	20.09	15643222	2.3	0.9706	ALIGNED	19.94	19.86	20.07	13494279	2	0.9494	TRUE	19.85	19.72	19.97	2803510	3.4	0.9618	ALIGNED
sp|P02663|CASA2_BOVIN	LYQGPIVL	451.7709++	2	451.771	LYQGPIVL	17.03	16.91	17.17	30408350	-0.8	0.9682	TRUE	17	16.9	17.16	27079134	-1.1	0.9776	TRUE	16.93	16.85	17.12	3122568	-0.6	0.977	ALIGNED
sp|P02663|CASA2_BOVIN	YQGPIVLNPWDQ	715.3592++	2	715.359	YQGPIVLNPWDQ	17.92	17.85	17.93	193624	-2.2	0.91	ALIGNED	17.97	17.9	18.09	17972798	-1.9	0.9908	ALIGNED	17.88	17.78	18.04	34096680	-1.5	0.9931	TRUE															17.72	17.59	17.83	732509	-0.8	0.9615	ALIGNED
sp|P02663|CASA2_BOVIN	YQGP	464.2140+	1	464.214	YQGP
sp|P02663|CASA2_BOVIN	YQGPIV	676.3665+	1	676.366	YQGPIV	11.22	11.14	11.38	4680334848	-1.8	0.9909	ALIGNED	11.23	11.11	11.38	4702051840	-2.1	0.9923	ALIGNED	11.2	11.1	11.39	5756964864	-1.6	0.9917	TRUE	11.24	11.16	11.31	81572	0.7	0.8343	ALIGNED								11.23	11.11	11.37	4081497	0	0.95	ALIGNED
sp|P02663|CASA2_BOVIN	YQGPIV	338.6869++	2	338.687	YQGPIV	11.25	11.14	11.38	332528832	-0.4	0.9858	ALIGNED	11.22	11.11	11.38	340172992	-0.6	0.992	ALIGNED	11.2	11.1	11.39	461366336	-0.5	0.9839	TRUE															11.23	11.11	11.37	566113	-0.2	0.8931	ALIGNED
sp|P02663|CASA2_BOVIN	YQGPIVLNPWDQVK	828.9408++	2	828.941	YQGPIVLNPWDQVK	17.18	17.1	17.38	24427572	0.5	0.9964	TRUE	17.17	17.1	17.3	4292504	1	0.9923	ALIGNED	17.07	17.01	17.18	1217476	2.3	0.9517	ALIGNED	17.04	16.95	17.09	73453	2.5	0.9489	ALIGNED
sp|P02663|CASA2_BOVIN	YQGPIVLNPWD	651.3299++	2	651.33	YQGPIVLNPWD	18.37	18.2	18.5	73716248	-3.1	0.986	TRUE	18.37	18.21	18.47	64066728	-3.6	0.9877	TRUE	18.26	18.14	18.38	21946048	-1.2	0.9835	TRUE	18.24	18.04	18.31	70415	-1.4	0.8577	ALIGNED
sp|P02663|CASA2_BOVIN	YQGPIVLNPWDQV	764.8934++	2	764.893	YQGPIVLNPWDQV	19.51	19.4	19.66	918518720	-1.6	0.9956	TRUE	19.49	19.39	19.63	1162333440	-1.6	0.9977	TRUE	19.37	19.29	19.56	558975424	-0.4	0.998	ALIGNED
sp|P02663|CASA2_BOVIN	YQGPIVLNPW	1186.6255+	1	1186.63	YQGPIVLNPW	18.93	18.85	19.08	164183424	-0.3	0.9932	TRUE	18.93	18.83	19.07	151723328	-0.6	0.9933	TRUE	18.83	18.75	18.97	45287432	0.3	0.9906	TRUE
sp|P02663|CASA2_BOVIN	YQGPIVLNPW	593.8164++	2	593.816	YQGPIVLNPW	18.93	18.85	19.08	405541216	-0.5	0.9945	TRUE	18.93	18.83	19.07	368626048	-0.6	0.9968	TRUE	18.83	18.75	18.97	122135616	0.3	0.9918	TRUE	18.79	18.62	18.99	186038	1.7	0.9908	ALIGNED	18.72	18.61	18.92	386109	1.8	0.9832	ALIGNED	18.66	18.58	18.78	999242	-2.1	0.913	ALIGNED
sp|P02663|CASA2_BOVIN	YQGPIVLNPWDQVKR	604.9967+++	3	604.997	YQGPIVLNPWDQVKR																						15.53	15.32	15.66	682903	2.4	0.9876	ALIGNED	15.5	15.37	15.66	3223167	1.6	0.9721	TRUE	15.47	15.31	15.64	2282475	3.9	0.9932	ALIGNED
sp|P02663|CASA2_BOVIN	QGPIVLNPWDQV	683.3617++	2	683.362	QGPIVLNPWDQV	18.73	18.63	18.88	369429152	0.1	0.9951	TRUE	18.71	18.61	18.85	461907936	-0.4	0.9973	TRUE	18.63	18.53	18.76	288605728	0.6	0.9948	TRUE
sp|P02663|CASA2_BOVIN	QGPIV	513.3031+	1	513.303	QGPIV	8.7	8.59	8.87	1877599616	0.1	0.9903	ALIGNED	8.69	8.56	8.86	1591295744	-0.3	0.9876	ALIGNED	8.71	8.6	8.89	2200718080	0.3	0.9911	TRUE	8.63	8.48	8.95	567157	1.3	0.8674	ALIGNED	8.64	8.42	8.73	2214091	-0.2	0.9562	ALIGNED	8.74	8.46	8.98	4745835	-0.5	0.9619	ALIGNED
sp|P02663|CASA2_BOVIN	QGPIVLNPWDQ	633.8275++	2	633.827	QGPIVLNPWDQ	17.06	16.98	17.18	6203964	1.8	0.9647	ALIGNED	17.07	16.99	17.13	5249933	1	0.9758	ALIGNED	16.97	16.88	17.11	16814664	0.7	0.9879	TRUE															16.83	16.76	16.98	423523	4	0.9931	ALIGNED
sp|P02663|CASA2_BOVIN	QGPIVL	626.3872+	1	626.387	QGPIVL	13.71	13.61	13.93	646578880	0.8	0.9922	ALIGNED	13.73	13.6	13.93	617190784	0.1	0.9938	TRUE	13.69	13.56	13.9	85331872	0.9	0.9879	ALIGNED															13.65	13.4	13.75	3722142	2.3	0.8991	ALIGNED
sp|P02663|CASA2_BOVIN	QGPIVLNPW	1023.5622+	1	1023.56	QGPIVLNPW	17.99	17.89	18.16	233866432	-1.3	0.9906	TRUE	17.97	17.88	18.13	209178320	-1.6	0.9962	TRUE	17.92	17.81	18.09	86526328	-1.2	0.9926	ALIGNED
sp|P02663|CASA2_BOVIN	QGPIVLNPW	512.2847++	2	512.285	QGPIVLNPW	17.99	17.89	18.16	211839328	-1.3	0.9968	TRUE	17.97	17.88	18.13	181191360	-1.5	0.991	TRUE	17.91	17.81	18.09	109933432	-1.3	0.9868	ALIGNED	17.87	17.78	18.02	175549	1.2	0.9129	ALIGNED	17.83	17.74	18.01	669816	1.6	0.9733	ALIGNED	17.75	17.7	17.91	486523	-0.5	0.9855	ALIGNED
sp|P02663|CASA2_BOVIN	QGPIVLNPWD	569.7982++	2	569.798	QGPIVLNPWD	17.4	17.28	17.52	34830560	-1.2	0.9708	ALIGNED	17.39	17.26	17.56	31774364	-1.5	0.9475	TRUE	17.33	17.17	17.46	16044870	-0.6	0.9948	TRUE	16.94	16.68	17.17	1561578	0.9	0.9685	ALIGNED								16.87	16.87	17.14	267668	3.4	0.9261	ALIGNED
sp|P02663|CASA2_BOVIN	QGPIVLNPWDQVK	747.4092++	2	747.409	QGPIVLNPWDQVK	16.32	16.21	16.44	18162712	-1.3	0.9895	TRUE	16.32	16.22	16.39	3675039	1.8	0.9081	ALIGNED																						16.11	16.02	16.2	500657	1.2	0.945	ALIGNED
sp|P02663|CASA2_BOVIN	GPIVLNPWDQV	619.3324++	2	619.332	GPIVLNPWDQV	18.77	18.69	18.96	25908170	-0.6	0.9755	TRUE	18.76	18.67	18.91	32280622	-0.7	0.9886	TRUE	18.68	18.58	18.85	21567822	-1.6	0.9796	TRUE								18.19	18.05	18.37	144081744	3.3	0.9926	ALIGNED
sp|P02663|CASA2_BOVIN	GPIVLNPWDQVKR	507.9561+++	3	507.956	GPIVLNPWDQVKR																						14.62	14.54	14.69	1270567	1.8	0.9786	ALIGNED	14.58	14.51	14.75	4175939	-0.4	0.9908	TRUE
sp|P02663|CASA2_BOVIN	GPIVLNPW	448.2554++	2	448.255	GPIVLNPW	17.98	17.8	18.18	11598229	-2.2	0.9862	ALIGNED	17.95	17.8	18.27	15196434	-2.1	0.9355	TRUE	17.92	17.73	18.27	7541068	-1.2	0.9046	ALIGNED	17.62	17.49	17.71	199538	4.1	0.9538	ALIGNED	17.85	17.67	18	7943431	0.6	0.9972	ALIGNED	17.8	17.57	17.95	2122444	-0.8	0.9836	ALIGNED
sp|P02663|CASA2_BOVIN	GPIVLNPWDQVK	683.3799++	2	683.38	GPIVLNPWDQVK								15.97	15.96	16.17	2159689	3.6	0.8966	ALIGNED								16.16	15.91	16.54	1256079	0.4	0.8539	ALIGNED	16.1	15.87	16.3	3736095	-1.9	0.9107	TRUE	16.09	15.87	16.25	3962257	0.2	0.9688	TRUE
sp|P02663|CASA2_BOVIN	GPIVLNPWDQVKR	508.2841+++	3	508.284	GPIVLNPWDQ[+1]VKR																						15.06	14.97	15.18	354595	1.2	0.9329	ALIGNED	15.02	14.95	15.17	1226619	4.3	0.9937	TRUE	14.96	14.87	15.04	123531	4.2	0.9166	ALIGNED
sp|P02663|CASA2_BOVIN	GPIVLNPWDQ	569.7982++	2	569.798	GPIVLNPWDQ								17.03	16.81	17.07	8552367	-1.1	0.9743	ALIGNED	16.97	16.87	17.04	3721373	0.7	0.9614	ALIGNED	16.93	16.69	17.09	1491993	1.2	0.9824	ALIGNED	16.87	16.63	17.03	6485208	3.2	0.9816	TRUE	16.81	16.68	16.97	2776696	1.6	0.9732	TRUE
sp|P02663|CASA2_BOVIN	PIVLNPWDQV	590.8217++	2	590.822	PIVLNPWDQV	18.83	18.73	18.95	45999592	-0.1	0.9901	TRUE	18.8	18.72	18.95	51501252	-0.5	0.999	TRUE	18.73	18.64	18.84	37366124	-0.4	0.9886	TRUE
sp|P02663|CASA2_BOVIN	PIVLNPW	838.4822+	1	838.482	PIVLNPW	18.01	17.92	18.12	29284128	-1.7	0.9721	TRUE	17.99	17.92	18.09	22506412	-2.4	0.9555	TRUE	17.93	17.84	18.04	12885337	-2.1	0.98	TRUE
sp|P02663|CASA2_BOVIN	PIVLNPW	419.7447++	2	419.745	PIVLNPW	18.01	17.92	18.12	17594940	-1.2	0.9631	TRUE	17.99	17.92	18.09	11820993	-1.7	0.9707	TRUE	17.94	17.84	18.04	8608499	-0.9	0.9687	TRUE
sp|P02663|CASA2_BOVIN	IVL	344.2544+	1	344.254	IVL															11.25	11.17	11.47	1734966272	-0.8	0.9844	TRUE	11.36	11.27	11.52	470729	-1	0.9776	ALIGNED	11.39	11.29	11.58	3630643	-0.8	0.9708	ALIGNED	11.38	11.27	11.55	1424720	-2	0.9015	ALIGNED
sp|P02663|CASA2_BOVIN	VLNP	442.2660+	1	442.266	VLNP	5.45	5.21	5.74	19348900	-0.7	0.9329	ALIGNED	5.43	5.27	5.71	23584494	-0.5	0.9263	TRUE	5.46	5.28	5.73	98696928	0.4	0.9702	TRUE								5.52	5.4	5.68	1086105	-0.9	0.8657	ALIGNED	5.52	5.42	5.73	3320280	-1.2	0.9366	ALIGNED
sp|P02663|CASA2_BOVIN	NPWDQV	758.3468+	1	758.347	NPWDQV	12.46	12.34	12.6	1404728192	-2	0.9942	TRUE	12.43	12.34	12.58	1927193472	-2.7	0.9953	TRUE	12.41	12.29	12.55	2036999040	-2.2	0.9906	TRUE								12.41	12.35	12.5	92424	3.7	0.8197	ALIGNED
sp|P02663|CASA2_BOVIN	NPWDQ	659.2784+	1	659.278	NPWDQ	8.42	8.32	8.55	26470310	-1.2	0.9449	TRUE	8.41	8.3	8.54	31685872	-1.3	0.9495	TRUE	8.46	8.34	8.59	112441456	-0.7	0.9823	TRUE	8.52	8.41	8.63	1148682	0.2	0.9681	ALIGNED	8.51	8.38	8.66	7729413	0.6	0.9828	ALIGNED	8.51	8.4	8.62	478990	0	0.8957	ALIGNED
sp|P02663|CASA2_BOVIN	NPWDQVK	443.7245++	2	443.725	NPWDQVK	9.73	9.57	9.84	131133168	0.3	0.9916	TRUE	9.71	9.57	9.78	17812318	5	0.9144	ALIGNED	9.73	9.6	9.8	14913654	0.9	0.9841	ALIGNED	9.82	9.67	9.95	372970	-1.8	0.9492	ALIGNED	9.8	9.66	9.94	3014590	-1	0.9933	ALIGNED	9.78	9.64	9.92	5883253	0	0.986	TRUE
sp|P02663|CASA2_BOVIN	RNAVPIT	770.4519+	1	770.452	RNAVPIT	7.39	7.22	7.53	26648894	-1.4	0.9753	TRUE	7.38	7.31	7.53	23192536	-1.1	0.9772	TRUE	7.39	7.22	7.52	19205456	-1.6	0.9683	TRUE
sp|P02663|CASA2_BOVIN	RNAVPIT	385.7296++	2	385.73	RNAVPIT	7.38	7.22	7.53	46546884	-0.7	0.9918	TRUE	7.38	7.31	7.53	36316976	-1	0.9791	TRUE	7.39	7.22	7.52	33231434	-1.2	0.9887	TRUE
sp|P02663|CASA2_BOVIN	RNAVPITPT	968.5524+	1	968.552	RNAVPITPT	8.58	8.48	8.7	63155420	0.3	0.9915	TRUE	8.56	8.46	8.67	54076952	-0.4	0.9953	TRUE	8.57	8.46	8.71	51628012	0.2	0.9891	TRUE
sp|P02663|CASA2_BOVIN	RNAVPITPT	484.7798++	2	484.78	RNAVPITPT	8.58	8.48	8.7	337883328	0.1	0.9951	TRUE	8.56	8.46	8.67	287195424	-0.5	0.9925	TRUE	8.59	8.46	8.71	295874656	-0.2	0.9894	TRUE															8.61	8.47	8.72	1272427	-2.8	0.9345	ALIGNED
sp|P02663|CASA2_BOVIN	NAVPITPT	812.4512+	1	812.451	NAVPITPT	9.48	9.4	9.62	5680727552	-0.7	0.9947	TRUE	9.47	9.39	9.6	5927768576	-1.4	0.9953	TRUE	9.47	9.39	9.61	4304112640	-1.1	0.9952	TRUE	9.53	9.44	9.64	473321	1.8	0.977	ALIGNED	9.53	9.44	9.68	4931310	1.5	0.9902	TRUE	9.52	9.42	9.63	5490246	-1	0.9861	TRUE
sp|P02663|CASA2_BOVIN	NAVPITPT	406.7293++	2	406.729	NAVPITPT	9.49	9.4	9.62	1752802176	-0.8	0.9944	TRUE	9.47	9.39	9.6	1648745984	-1.5	0.9932	TRUE	9.47	9.39	9.61	1568152192	-1.1	0.9931	TRUE	9.53	9.44	9.64	663394	1.1	0.9795	ALIGNED	9.53	9.44	9.68	4935841	1	0.9864	TRUE	9.5	9.42	9.63	4922378	-1.9	0.978	TRUE
sp|P02663|CASA2_BOVIN	NAVPIT	307.6790++	2	307.679	NAVPIT	8.3	8.2	8.42	86051776	-1.1	0.9701	TRUE	8.27	8.2	8.42	79250536	-1.3	0.9796	TRUE	8.31	8.24	8.43	72152232	-0.8	0.978	TRUE	8.42	8.29	8.45	24499	2.5	0.8348	ALIGNED
sp|P02663|CASA2_BOVIN	NAVPITPT	813.4353+	1	813.435	N[+1]AVPITPT	10.03	9.93	10.12	215722640	-0.3	0.9905	TRUE	10.01	9.91	10.1	216271136	-0.5	0.9897	TRUE	10	9.9	10.1	160283536	-0.1	0.9928	TRUE	9.99	9.95	10.06	67979	0.8	0.819	ALIGNED	9.98	9.88	10.05	373019	0.9	0.9414	ALIGNED
sp|P02663|CASA2_BOVIN	NAVPITPT	407.2213++	2	407.221	N[+1]AVPITPT	10.02	9.93	10.12	53371496	-0.2	0.9899	TRUE	10.01	9.91	10.1	56162300	-0.3	0.978	TRUE	10	9.9	10.1	44089084	-0.3	0.9753	TRUE	10.01	9.95	10.06	51563	2.3	0.957	ALIGNED
sp|P02663|CASA2_BOVIN	AVPITPT	698.4083+	1	698.408	AVPITPT	9.01	8.87	9.18	206443920	-0.3	0.9887	TRUE	8.98	8.86	9.17	260048688	-0.6	0.9898	TRUE	9	8.87	9.14	274645408	-0.1	0.9882	TRUE	9.01	8.88	9.22	3598919	1.2	0.9919	ALIGNED	9.02	8.9	9.22	23203586	0.2	0.9895	TRUE	9	8.89	9.23	50748660	-0.5	0.991	TRUE
sp|P02663|CASA2_BOVIN	AVPITPT	349.7078++	2	349.708	AVPITPT	9.01	8.87	9.18	47429256	-0.3	0.9761	TRUE	8.98	8.86	9.17	65386144	-0.5	0.9865	TRUE	9	8.87	9.14	76422112	-0.1	0.9792	TRUE	9.01	8.88	9.22	2084351	0.9	0.9858	ALIGNED	9.02	8.9	9.22	9625647	1.1	0.9928	TRUE	9.01	8.89	9.23	21848228	-0.7	0.9905	TRUE
sp|P02663|CASA2_BOVIN	AVPITPTL	406.2498++	2	406.25	AVPITPTL																						14.29	14.19	14.51	234107	2.1	0.9372	ALIGNED	14.3	14.13	14.54	884758	2.8	0.9638	ALIGNED	14.26	14.06	14.46	4359818	3	0.9881	TRUE
sp|P02663|CASA2_BOVIN	VPITPT	627.3712+	1	627.371	VPITPT	8.06	7.96	8.28	164974832	-0.9	0.9853	TRUE	8.06	7.96	8.37	138150688	-1	0.9822	TRUE	8.09	7.97	8.33	98015560	-0.4	0.9739	TRUE	8.1	7.99	8.39	38235192	-0.1	0.9916	TRUE	8.13	8.01	8.42	106813432	-0.7	0.9913	TRUE	8.13	8	8.4	55315580	-0.5	0.9914	TRUE
sp|P02663|CASA2_BOVIN	PITP	427.2551+	1	427.255	PITP	14.56	14.21	15.04	138769680	-0.5	0.951	TRUE	14.52	14.19	15.02	131075136	-1	0.9508	TRUE	14.44	14.13	15.02	224466080	-1.3	0.923	TRUE	5.73	5.54	6.76	6845289	0.8	0.9705	ALIGNED	5.76	5.55	6.76	85501304	0.1	0.9811	TRUE	5.81	5.59	6.77	112516280	-0.4	0.9905	TRUE
sp|P02663|CASA2_BOVIN	LNREQL	386.7192++	2	386.719	LNREQL	7.14	7.14	7.18	79857	2.3	0.8179	ALIGNED															7.21	7.13	7.33	2741450	0.5	0.9792	ALIGNED	7.27	7.18	7.43	13080880	-0.1	0.9904	TRUE	7.28	7.2	7.42	17928294	-0.9	0.9907	TRUE
sp|P02663|CASA2_BOVIN	NREQLSTSEENS	777.2795++	2	777.279	NREQLS[+80]TS[+80]EENS								5.21	5.16	5.3	10553748	-1.1	0.9586	ALIGNED	5.22	5.15	5.3	34300400	-1.2	0.9884	TRUE	5.2	5.14	5.36	97579	-2.1	0.8624	ALIGNED
sp|P02663|CASA2_BOVIN	NREQL	659.3471+	1	659.347	NREQL	4.48	4.41	4.65	98389776	-0.5	0.9862	TRUE	4.46	4.39	4.61	92886168	-0.8	0.985	TRUE	4.47	4.4	4.66	49178412	-0.6	0.9781	TRUE	4.62	4.54	4.71	1691971	-1.3	0.9824	TRUE	4.7	4.63	4.92	9063855	-1.5	0.9749	ALIGNED	4.72	4.64	4.91	2920871	-2	0.9699	TRUE
sp|P02663|CASA2_BOVIN	NREQL	330.1772++	2	330.177	NREQL	4.47	4.41	4.65	157364000	-0.7	0.9788	TRUE	4.44	4.39	4.61	149490016	-1.2	0.9766	TRUE	4.45	4.4	4.66	74276280	-1	0.9797	TRUE
sp|P02663|CASA2_BOVIN	EQLSTSEENSKK	770.3024++	2	770.302	EQLST[+80]S[+80]EENSKK	4.55	4.43	4.64	58171088	1.1	0.936	TRUE	4.54	4.5	4.61	28888972	0.3	0.9741	ALIGNED
sp|P02663|CASA2_BOVIN	EQLSTSEENSK	1411.5026+	1	1411.5	EQLS[+80]TS[+80]EENSK	4.82	4.76	4.9	13345775	0.6	0.9853	TRUE	4.82	4.75	4.91	12698111	0	0.976	TRUE	4.82	4.75	4.91	6133379	0.4	0.9814	ALIGNED								4.8	4.74	4.89	361270	-0.9	0.987	TRUE
sp|P02663|CASA2_BOVIN	EQLSTSEENSK	706.2549++	2	706.255	EQLS[+80]TS[+80]EENSK	4.82	4.76	4.9	37642752	-0.9	0.9823	TRUE	4.82	4.75	4.91	35801704	-1.1	0.9968	TRUE	4.81	4.75	4.91	19291036	-1.2	0.9886	ALIGNED	4.81	4.74	4.92	2194750	-0.2	0.9821	ALIGNED	4.8	4.74	4.89	11142980	-1.1	0.9845	TRUE	4.8	4.74	4.91	1740187	-1.8	0.9848	ALIGNED
sp|P02663|CASA2_BOVIN	EQLSTSEENSK	666.2718++	2	666.272	EQLSTS[+80]EENSK	5.16	5.1	5.26	20758520	0	0.9788	TRUE	5.16	5.09	5.27	18907516	-0.6	0.9543	ALIGNED	5.16	5.11	5.23	9079688	-0.5	0.976	ALIGNED
sp|P02663|CASA2_BOVIN	LST	320.1816+	1	320.182	LST	2.51	2.51	2.75	96054408	0.1	0.8	TRUE								3.25	3.18	3.43	1942701440	-0.4	0.9859	ALIGNED								3.39	3.32	3.54	2897571	-1.5	0.8922	TRUE	3.41	3.34	3.55	5159858	-1.3	0.9886	ALIGNED
sp|P02663|CASA2_BOVIN	KTVDMESTEV	609.7516++	2	609.752	KTVDMES[+80]TEV	9.26	9.19	9.38	90487272	-0.6	0.9789	TRUE	9.24	9.19	9.36	87513304	-0.8	0.9847	TRUE	9.24	9.16	9.34	57470488	-0.4	0.9915	TRUE								9.27	9.19	9.33	139820	1.3	0.8868	ALIGNED	9.24	9.18	9.33	85677	-0.2	0.8939	ALIGNED
sp|P02663|CASA2_BOVIN	TVDMESTEV	1106.3959+	1	1106.4	TVDM[+16]EST[+80]EV	6.95	6.88	7.03	17506698	0	0.9767	TRUE	6.93	6.87	7.02	11407491	-0.6	0.973	ALIGNED	6.92	6.86	7	8983352	0.3	0.974	ALIGNED
sp|P02663|CASA2_BOVIN	TVDMESTE	991.3326+	1	991.333	TVDMEST[+80]E	6.63	6.55	6.71	31254884	0.7	0.9884	TRUE	6.63	6.55	6.7	6865531	0.1	0.9751	ALIGNED
sp|P02663|CASA2_BOVIN	TVDMESTE	496.1699++	2	496.17	TVDMEST[+80]E	6.63	6.55	6.71	22965334	0.7	0.9804	TRUE	6.63	6.55	6.7	5182573	-0.5	0.9719	ALIGNED	6.61	6.57	6.67	570803	-0.1	0.8834	ALIGNED
sp|P02663|CASA2_BOVIN	TVDMESTEVFT	669.7622++	2	669.762	TVDMES[+80]TEVFT	13.32	13.24	13.45	58097660	0.7	0.9918	TRUE	13.31	13.21	13.44	90306880	0.8	0.9904	TRUE	13.25	13.17	13.35	16654005	0.6	0.9932	ALIGNED								13.17	13.1	13.31	258252	2.5	0.9515	ALIGNED	13.14	13.06	13.24	789521	1.4	0.9789	ALIGNED
sp|P02663|CASA2_BOVIN	TVDME	594.2440+	1	594.244	TVDME	5.94	5.85	6.07	112722216	-0.3	0.9441	TRUE	5.93	5.86	6.05	87395440	-0.8	0.95	TRUE	5.96	5.87	6.06	63376716	-0.4	0.9449	TRUE	5.95	5.87	6.07	1526906	-1.1	0.9388	ALIGNED	6	5.93	6.1	12089805	-1.5	0.9498	TRUE	6.01	5.92	6.13	7331026	-0.4	0.947	TRUE
sp|P02663|CASA2_BOVIN	TVDMESTEV	1090.4010+	1	1090.4	TVDMEST[+80]EV	9.95	9.86	10.05	391491296	0	0.9914	ALIGNED	9.93	9.86	10.04	310266624	-0.4	0.9954	TRUE	9.92	9.83	10	190007360	-0.3	0.992	TRUE
sp|P02663|CASA2_BOVIN	TVDMESTEV	545.7041++	2	545.704	TVDMEST[+80]EV	9.95	9.86	10.05	357967296	-0.1	0.9897	ALIGNED	9.94	9.86	10.04	298998880	-0.4	0.9849	TRUE	9.92	9.83	10	185039536	-0.3	0.9882	TRUE
sp|P02663|CASA2_BOVIN	DMESTEV	890.2849+	1	890.285	DMES[+80]TEV	8.21	8.14	8.31	31527550	-0.6	0.9808	ALIGNED	8.21	8.14	8.29	40545640	-0.8	0.9763	TRUE	8.19	8.1	8.27	18814420	0	0.9817	ALIGNED
sp|P02663|CASA2_BOVIN	MESTE	676.1895+	1	676.19	MES[+80]TE								2.52	2.46	2.6	3062628	-0.6	0.9539	ALIGNED								2.52	2.43	2.64	5680872	-0.2	0.9666	ALIGNED	2.54	2.48	2.64	22823230	-1.4	0.968	TRUE	2.55	2.46	2.65	4605346	0.5	0.9682	TRUE
sp|P02663|CASA2_BOVIN	MESTEVFTK	576.2381++	2	576.238	MES[+80]TEVFTK															9.76	9.72	9.8	210906	4.2	0.8584	ALIGNED	9.82	9.74	9.91	1291037	-1.7	0.9788	ALIGNED	9.8	9.71	9.92	15652510	-1.4	0.9912	TRUE	9.78	9.7	9.92	15601576	-0.6	0.9904	TRUE
sp|P02663|CASA2_BOVIN	MESTEVFT	512.1907++	2	512.191	MEST[+80]EVFT																						11.18	11.09	11.29	856130	1.9	0.9975	ALIGNED	11.11	11.04	11.23	6657350	-0.4	0.9833	TRUE	11.1	11.02	11.2	13391170	-1.7	0.9843	TRUE
sp|P02663|CASA2_BOVIN	ESTEVFTK	510.7179++	2	510.718	ES[+80]TEVFTK																						8.15	8.08	8.23	339855	0.6	0.9401	ALIGNED	8.16	8.05	8.27	3956307	-0.7	0.9874	TRUE	8.14	8.06	8.3	3866239	-0.7	0.9939	TRUE
sp|P02663|CASA2_BOVIN	STEVFT	763.2910+	1	763.291	S[+80]TEVFT																						9.31	9.22	9.4	611208	1.5	0.9782	ALIGNED	9.27	9.17	9.39	6126754	2.1	0.9844	TRUE	9.25	9.18	9.35	3331797	1.3	0.9926	ALIGNED
sp|P02663|CASA2_BOVIN	STEVFT	382.1491++	2	382.149	S[+80]TEVFT																						9.29	9.22	9.4	328989	0.7	0.9815	ALIGNED	9.27	9.17	9.39	2821275	1.3	0.9883	TRUE	9.25	9.18	9.35	1561344	0.8	0.9867	ALIGNED
sp|P02663|CASA2_BOVIN	STEVFTK	446.1966++	2	446.197	S[+80]TEVFTK																						7.68	7.61	7.76	342831	0.8	0.9562	ALIGNED	7.69	7.61	7.85	3056414	-0.9	0.9988	TRUE	7.68	7.6	7.85	2236799	-1.2	0.9959	TRUE
sp|P02663|CASA2_BOVIN	EVFT	495.2449+	1	495.245	EVFT																						7.8	7.68	7.95	1209490	1.1	0.9838	TRUE	7.84	7.74	7.98	10386841	0.1	0.9913	TRUE	7.84	7.75	7.97	1690630	-0.2	0.9705	TRUE
sp|P02663|CASA2_BOVIN	FTK	395.2289+	1	395.229	FTK	1.68	1.5	1.75	5902707	-0.1	0.9427	TRUE
sp|P02663|CASA2_BOVIN	KTK	376.2554+	1	376.255	KTK	0.43	0.38	0.54	32370632	1.2	0.9719	TRUE	0.43	0.39	0.53	17557172	1.4	0.963	TRUE	0.43	0.38	0.52	2316104	1.1	0.9235	ALIGNED
sp|P02663|CASA2_BOVIN	TKLTEEEK	977.5150+	1	977.515	TKLTEEEK	3.73	3.66	3.83	47120912	0	0.9918	TRUE	3.7	3.63	3.8	38174448	-0.7	0.9884	TRUE	3.73	3.64	3.83	11814111	-0.4	0.9957	TRUE
sp|P02663|CASA2_BOVIN	TKLTEEEK	489.2611++	2	489.261	TKLTEEEK	3.73	3.66	3.83	349482784	-0.2	0.9923	TRUE	3.7	3.63	3.8	278381856	-0.9	0.9948	TRUE	3.73	3.64	3.83	76020664	-0.9	0.99	TRUE
sp|P02663|CASA2_BOVIN	TKLTEEEK	326.5098+++	3	326.51	TKLTEEEK	3.73	3.66	3.83	416316064	-0.4	0.997	TRUE	3.7	3.63	3.8	323380672	-1.1	0.9938	TRUE	3.73	3.64	3.83	95556648	-1	0.9755	TRUE	4.06	3.95	4.17	114492	-0.2	0.9813	ALIGNED	3.87	3.81	3.96	134873	-1.2	0.9295	ALIGNED	3.87	3.71	3.94	43457	-0.9	0.9145	ALIGNED
sp|P02663|CASA2_BOVIN	TKLTEEEKN	546.2826++	2	546.283	TKLTEEEKN	3.63	3.57	3.71	71457528	0.2	0.9859	TRUE	3.62	3.55	3.69	100955888	-0.4	0.9901	TRUE	3.63	3.55	3.71	58966932	-0.1	0.989	TRUE
sp|P02663|CASA2_BOVIN	TKLTEE	360.6923++	2	360.692	TKLTEE																						4.48	4.4	4.59	1199277	-1.1	0.9662	ALIGNED	4.53	4.46	4.66	3552181	-0.9	0.9565	ALIGNED	4.54	4.46	4.69	3382440	-1.2	0.9777	TRUE
sp|P02663|CASA2_BOVIN	TKLTEEE	425.2136++	2	425.214	TKLTEEE	5.14	5.06	5.21	14522596	1.8	0.9724	ALIGNED	5.13	5.06	5.22	21382880	1	0.981	TRUE	5.16	5.08	5.23	24951444	0.5	0.973	TRUE	5.29	5.24	5.4	418307	-0.2	0.9106	ALIGNED	5.22	5.14	5.3	3274022	-0.6	0.9815	ALIGNED
sp|P02663|CASA2_BOVIN	KLTEEEK	438.7373++	2	438.737	KLTEEEK	2.41	2.36	2.49	21086368	-0.4	0.9846	ALIGNED	2.4	2.35	2.49	16086333	-0.4	0.9818	TRUE	2.42	2.37	2.5	5223089	-1	0.9706	ALIGNED
sp|P02663|CASA2_BOVIN	LTE	362.1922+	1	362.192	LTE	3.18	3.03	3.23	9761270	-0.5	0.8873	TRUE	3.16	3	3.23	9809173	-0.9	0.928	ALIGNED	3.17	3.02	3.23	8057504	-0.2	0.9183	ALIGNED	3.33	3.24	3.42	135783	-0.7	0.872	ALIGNED	3.39	3.33	3.53	1047930	-1.3	0.9551	ALIGNED	3.3	3.26	3.51	857470	-1.6	0.9698	ALIGNED
sp|P02663|CASA2_BOVIN	LTEEEKN	431.7113++	2	431.711	LTEEEKN	2.43	2.32	2.51	316101184	-0.4	0.9832	TRUE	2.42	2.32	2.5	444211104	-0.8	0.9856	TRUE	2.43	2.32	2.5	227852896	-0.8	0.9785	TRUE	2.71	2.61	2.77	231531	0	0.9962	ALIGNED	2.77	2.61	2.85	857841	-0.4	0.985	ALIGNED	2.77	2.7	2.93	1322553	0.7	0.9944	ALIGNED
sp|P02663|CASA2_BOVIN	LTEEEK	748.3723+	1	748.372	LTEEEK	2.79	2.68	2.96	735630464	-0.7	0.9934	TRUE	2.78	2.64	2.95	653950592	-1.1	0.9934	TRUE								2.92	2.85	2.99	10229	-0.6	0.8194	ALIGNED	2.97	2.92	3.04	115351	-0.8	0.8321	ALIGNED	2.98	2.91	3.1	16182	0.1	0.8176	ALIGNED
sp|P02663|CASA2_BOVIN	LTEEEK	374.6898++	2	374.69	LTEEEK	2.79	2.68	2.96	1288337024	-0.9	0.996	TRUE	2.78	2.64	2.95	1141674624	-1.4	0.9907	TRUE	2.75	2.61	2.94	351869600	-2	0.9541	TRUE	2.92	2.85	2.99	129338	0.6	0.9318	ALIGNED	2.97	2.92	3.04	592823	-0.8	0.9856	ALIGNED	2.98	2.91	3.1	236817	-2.8	0.9054	ALIGNED
sp|P02663|CASA2_BOVIN	TEEE	507.1933+	1	507.193	TEEE																						1.02	0.91	1.14	2115940	-0.3	0.9769	ALIGNED								1.07	1.02	1.14	4389105	-1.2	0.9835	TRUE
sp|P02663|CASA2_BOVIN	TEEEK	635.2883+	1	635.288	TEEEK	2.78	2.66	2.97	203398000	-0.6	0.9927	TRUE	2.78	2.64	2.95	174853328	-0.8	0.9884	TRUE	2.76	2.66	2.97	67452816	-0.6	0.9824	ALIGNED	0.83	0.8	1	101402	2.8	0.8405	ALIGNED	2.88	2.78	3.03	886500	-0.9	0.9678	ALIGNED
sp|P02663|CASA2_BOVIN	NRLN	516.2889+	1	516.289	NRLN	1.14	1.1	1.2	218613312	-0.6	0.9726	TRUE	1.14	1.09	1.2	189090208	-1	0.9711	TRUE	1.12	1.08	1.19	100723816	-0.1	0.9838	TRUE	1.25	1.14	1.48	2508259	2	0.9757	ALIGNED	1.28	1.22	1.36	616526	1.4	0.9434	ALIGNED	1.4	1.28	1.55	1474826	2.5	0.9817	ALIGNED
sp|P02663|CASA2_BOVIN	NRLNF	332.1823++	2	332.182	NRLNF																						9.67	9.58	9.78	7254122	0.2	0.9787	TRUE	9.74	9.65	9.94	12004425	-1.7	0.9835	TRUE	9.73	9.69	9.98	7792371	-1.2	0.9878	TRUE
sp|P02663|CASA2_BOVIN	LNFL	506.2973+	1	506.297	LNFL								16.54	16.44	16.65	3611969	0	0.9187	ALIGNED								16.5	16.33	16.66	297632	0.7	0.9204	ALIGNED	16.48	16.32	16.68	795823	2.8	0.9341	TRUE	16.37	16.28	16.57	355407	2	0.8611	ALIGNED
sp|P02663|CASA2_BOVIN	LNFLK	317.6998++	2	317.7	LNFLK	11.6	11.57	11.7	493406	0.6	0.8031	ALIGNED	11.68	11.55	11.7	696942	0	0.8466	ALIGNED	11.64	11.54	11.75	1707315	-1.4	0.9439	ALIGNED	11.62	11.53	11.71	208167	0	0.9702	ALIGNED	11.65	11.56	11.82	2796304	-0.5	0.9549	TRUE	11.62	11.56	11.79	323298	-1.5	0.9212	ALIGNED
sp|P02663|CASA2_BOVIN	LKKISQ	358.7369++	2	358.737	LKKISQ																																				3.28	3.19	3.41	1866728	-1.6	0.9904	TRUE
sp|P02663|CASA2_BOVIN	KIS	347.2289+	1	347.229	KIS	0.64	0.6	0.79	9236480	-2	0.9006	ALIGNED	0.64	0.6	0.79	9011607	-2.2	0.9049	ALIGNED	0.79	0.62	0.8	6258908	-1.9	0.9037	ALIGNED								0.97	0.94	1.03	657226	-1.1	0.9719	ALIGNED	0.89	0.85	1.14	2287874	-1.6	0.9781	TRUE
sp|P02663|CASA2_BOVIN	KISQ	475.2875+	1	475.287	KISQ	1.06	1	1.17	72733920	-0.9	0.9788	ALIGNED	1.06	0.97	1.17	62353636	-1.5	0.9757	ALIGNED	1.03	0.99	1.04	8464209	-0.5	0.9806	ALIGNED	1.1	0.99	1.22	1208538	0	0.9826	ALIGNED								1.16	1.1	1.3	5256674	-1	0.9822	TRUE
sp|P02663|CASA2_BOVIN	ISQRYQ	397.7114++	2	397.711	ISQRYQ																						4.22	4.13	4.29	737003	0.4	0.9796	ALIGNED	4.26	4.17	4.35	1636764	-0.8	0.9579	TRUE	4.26	4.2	4.36	1969849	-1.9	0.9911	ALIGNED
sp|P02663|CASA2_BOVIN	KFALPQY	433.7422++	2	433.742	KFALPQY																																				13.39	13.22	13.53	6646930	2.2	0.9846	TRUE
sp|P02663|CASA2_BOVIN	FAL	350.2074+	1	350.207	FAL	12.21	12.11	12.39	179060288	-0.3	0.9809	TRUE	12.21	12.09	12.36	149381984	-0.7	0.9813	TRUE	12.22	12.12	12.3	3205903	-0.7	0.8986	ALIGNED	12.27	12.18	12.41	60607	2.4	0.9632	ALIGNED	12.32	12.21	12.5	258670	3.3	0.8255	ALIGNED	12.29	12.16	12.46	4990399	0.7	0.9841	ALIGNED
sp|P02663|CASA2_BOVIN	FALPQ	575.3188+	1	575.319	FALPQ	12.26	12.1	12.38	1042087168	0.5	0.9897	TRUE	12.23	12.09	12.36	978857856	-0.1	0.9908	TRUE	12.19	12.06	12.35	341458432	0.3	0.9884	TRUE	12.21	12.1	12.45	392802	4.8	0.9744	ALIGNED	12.21	12.08	12.33	1818742	1.1	0.9626	ALIGNED	12.18	12.06	12.26	832837	0.7	0.956	ALIGNED
sp|P02663|CASA2_BOVIN	FALPQ	288.1630++	2	288.163	FALPQ	12.24	12.1	12.38	439975776	-0.3	0.9884	TRUE	12.23	12.09	12.36	375147552	-0.8	0.9878	TRUE	12.19	12.06	12.35	148848816	-0.4	0.9824	TRUE	12.2	12.1	12.45	322281	0.1	0.9402	ALIGNED	12.2	12.08	12.33	1362022	0.5	0.9488	ALIGNED	12.18	12.06	12.26	596599	-0.5	0.9588	ALIGNED
sp|P02663|CASA2_BOVIN	FALPQY	369.6947++	2	369.695	FALPQY																						14.9	14.83	14.99	51095	2.8	0.9227	ALIGNED	14.85	14.73	15.06	237528	3.3	0.9594	ALIGNED	14.84	14.69	14.96	8035179	2.9	0.9864	TRUE
sp|P02663|CASA2_BOVIN	ALPQ	428.2504+	1	428.25	ALPQ	5.16	5.07	5.33	4702972928	-0.1	0.9874	TRUE	5.17	5.07	5.32	5111717888	-1	0.9877	TRUE	5.18	5.11	5.35	2553980928	-0.3	0.9857	TRUE	5.21	5.12	5.42	3452403	0.3	0.9808	ALIGNED	5.27	5.18	5.47	19215564	-0.2	0.8878	ALIGNED	5.27	5.2	5.39	2144426	-0.9	0.8707	ALIGNED
sp|P02663|CASA2_BOVIN	ALPQYLKT	467.2738++	2	467.274	ALPQYLKT																						11.6	11.46	11.73	10652456	-0.3	0.9881	ALIGNED	11.62	11.47	11.78	27476070	-1.2	0.9877	TRUE	11.59	11.49	11.68	785170	-0.6	0.9389	ALIGNED
sp|P02663|CASA2_BOVIN	ALPQYLK	416.7500++	2	416.75	ALPQYLK	10.9	10.86	10.96	1005736	0.4	0.8117	ALIGNED	10.91	10.82	10.97	1129944	0	0.8068	ALIGNED	10.9	10.85	10.99	798453	-0.9	0.812	ALIGNED	10.92	10.74	11.05	1996001	0.6	0.9811	ALIGNED	10.95	10.82	11.13	8161904	0.3	0.9795	TRUE	10.93	10.79	11.04	840822	-1.6	0.9596	ALIGNED
sp|P02663|CASA2_BOVIN	LPQYL	317.1840++	2	317.184	LPQYL	13.63	13.41	13.7	5053970	0.6	0.9287	ALIGNED	13.59	13.44	13.69	5705820	0.1	0.9122	ALIGNED								13.52	13.34	13.67	3828678	1.8	0.9842	ALIGNED	13.53	13.35	13.68	8109214	2.1	0.9459	TRUE	13.49	13.34	13.6	825464	0.7	0.9511	ALIGNED
sp|P02663|CASA2_BOVIN	LPQYLK	381.2314++	2	381.231	LPQYLK																						10.1	9.79	10.23	5204515	0.6	0.9865	ALIGNED	10.13	9.81	10.28	12578372	0.5	0.9862	TRUE	10.11	9.86	10.23	995830	0.9	0.9877	ALIGNED
sp|P02663|CASA2_BOVIN	LPQYLKT	431.7553++	2	431.755	LPQYLKT																						10.86	10.51	11	17278006	1	0.9934	TRUE	10.87	10.56	11.04	48608740	0.7	0.9956	TRUE	10.86	10.66	10.96	623869	0.3	0.9339	ALIGNED
sp|P02663|CASA2_BOVIN	LPQYL	317.6760++	2	317.676	LPQ[+1]YL																						12.25	12.05	12.27	82624	4.8	0.8567	ALIGNED	12.14	12.07	12.26	110793	4	0.8909	ALIGNED	12.09	12.02	12.23	1635988	-0.3	0.9664	TRUE
sp|P02663|CASA2_BOVIN	PQY	407.1925+	1	407.193	PQY	4.29	4.12	4.35	42905144	-0.3	0.9721	ALIGNED	4.28	4.08	4.34	40435524	-0.6	0.9635	ALIGNED															4.45	4.36	4.54	34417136	-1.3	0.9821	ALIGNED	4.46	4.38	4.57	1863106	-0.7	0.9706	TRUE
sp|P02663|CASA2_BOVIN	PQY	408.1765+	1	408.177	PQ[+1]Y	4.93	4.72	4.96	4064987	3.4	0.8851	ALIGNED								4.95	4.71	4.98	5790268	1.3	0.9368	ALIGNED	4.78	4.71	4.92	336302	-1.1	0.858	ALIGNED	4.83	4.76	4.92	2184793	-1.3	0.9607	TRUE	4.85	4.78	4.94	170587	-0.8	0.8686	ALIGNED
sp|P02663|CASA2_BOVIN	PQYLK	648.3715+	1	648.372	PQYLK																						10.91	10.81	11.02	600047	1	0.9571	ALIGNED	10.94	10.82	11.07	2892093	0.7	0.9823	TRUE	10.93	10.83	10.99	284709	-1	0.9242	ALIGNED
sp|P02663|CASA2_BOVIN	YLK	423.2602+	1	423.26	YLK	2.61	2.36	3.02	41603388	-0.3	0.9719	TRUE	2.61	2.36	3.01	26193422	-0.8	0.9519	ALIGNED	2.64	2.58	2.73	3388840	-0.1	0.9824	ALIGNED
sp|P02663|CASA2_BOVIN	KTV	347.2289+	1	347.229	KTV	0.84	0.74	1.03	305811520	-1.9	0.9774	TRUE	0.9	0.74	1.01	227269520	-2	0.9782	TRUE	0.9	0.76	1.01	181246480	-1.8	0.9729	TRUE	1.24	1.17	1.35	84366	0	0.8915	ALIGNED	1.16	1.14	1.23	200547	-0.6	0.8907	ALIGNED	1.37	1.33	1.57	123310	2.7	0.9476	ALIGNED
sp|P02663|CASA2_BOVIN	TVYQ	510.2558+	1	510.256	TVYQ	4.17	4.09	4.31	28288282	-0.5	0.9825	ALIGNED	4.15	4.06	4.29	29256152	-0.6	0.9784	ALIGNED	4.17	4.09	4.31	9296131	-0.6	0.9475	ALIGNED	4.27	4.2	4.38	1194401	0.1	0.983	TRUE	4.32	4.23	4.43	12164971	-1.1	0.9807	ALIGNED	4.33	4.22	4.46	3327130	0.6	0.9786	ALIGNED
sp|P02663|CASA2_BOVIN	VYQHQ	674.3257+	1	674.326	VYQHQ	1.63	1.42	1.73	30446914	-0.6	0.9867	TRUE	1.59	1.42	1.72	42153700	-0.9	0.9878	TRUE	1.62	1.36	1.72	9698180	-0.5	0.9737	ALIGNED	1.67	1.54	1.83	39589	1	0.8271	ALIGNED	1.72	1.64	1.85	97118	1.2	0.8948	ALIGNED	1.73	1.66	1.84	57070	-0.1	0.9536	ALIGNED
sp|P02663|CASA2_BOVIN	VYQHQ	337.6665++	2	337.666	VYQHQ	1.63	1.42	1.73	64389940	-0.9	0.9836	TRUE	1.61	1.42	1.72	78308144	-1.3	0.98	TRUE	1.62	1.36	1.72	16341874	-0.7	0.9692	ALIGNED	1.69	1.54	1.83	268250	0.3	0.9655	ALIGNED	1.72	1.64	1.85	587512	0.7	0.9762	ALIGNED	1.73	1.66	1.84	552730	-0.2	0.9727	ALIGNED
sp|P02663|CASA2_BOVIN	QHQ	412.1939+	1	412.194	QHQ	1.63	1.42	1.77	9821512	-0.5	0.9318	ALIGNED	1.61	1.42	1.68	10248902	-0.5	0.9516	TRUE
sp|P02663|CASA2_BOVIN	AMKPW	324.6623++	2	324.662	AM[+16]KPW	7.54	7.4	7.74	313093312	-0.2	0.9513	TRUE	7.53	7.4	7.71	254338960	-0.3	0.9455	TRUE	7.55	7.39	7.7	261390880	-0.1	0.9466	TRUE	7.58	7.46	7.75	201755	0.4	0.8127	ALIGNED	7.67	7.54	7.78	535082	-2	0.8677	ALIGNED
sp|P02663|CASA2_BOVIN	AMKPW	632.3225+	1	632.322	AMKPW	9.91	9.81	10.08	2104296320	-0.5	0.9616	TRUE	9.91	9.79	10.07	1876829696	-1.1	0.9629	TRUE	9.92	9.82	10.1	1222219776	-0.5	0.961	TRUE	9.96	9.91	10.14	963257	-3.8	0.958	ALIGNED	10.05	9.91	10.29	2968151	-2.9	0.9205	ALIGNED	10.03	9.94	10.23	471768	2.1	0.8512	ALIGNED
sp|P02663|CASA2_BOVIN	AMKPW	316.6649++	2	316.665	AMKPW	9.94	9.81	10.08	3671661056	-0.2	0.9578	TRUE	9.91	9.79	10.07	3528530176	-0.8	0.9514	TRUE	9.93	9.82	10.1	3037292288	-0.2	0.9519	TRUE	10	9.91	10.14	4355562	0.7	0.956	ALIGNED	10.05	9.91	10.29	8755491	1.2	0.9476	ALIGNED	10.03	9.94	10.23	2320757	0.9	0.9438	ALIGNED
sp|P02663|CASA2_BOVIN	MKPW	561.2854+	1	561.285	MKPW	9.53	9.3	9.57	127505640	-0.1	0.8969	TRUE	9.5	9.39	9.64	183712208	-1	0.9363	TRUE	9.51	9.4	9.68	196909424	-0.7	0.9264	TRUE
sp|P02663|CASA2_BOVIN	MKPW	281.1463++	2	281.146	MKPW								9.5	9.39	9.64	410982432	-1.3	0.9593	TRUE	9.51	9.4	9.68	468682368	-0.9	0.9644	TRUE								9.62	9.46	9.71	1100794	0.2	0.9608	ALIGNED
sp|P02663|CASA2_BOVIN	KPW	430.2449+	1	430.245	KPW	9.92	9.81	10.09	719776256	-0.5	0.9825	TRUE	9.93	9.78	10.08	687595520	-0.8	0.9863	TRUE	9.92	9.82	10.1	590677056	-0.5	0.9763	TRUE	6.11	6	6.29	1256754	2.3	0.8867	ALIGNED	6.2	6.05	6.42	3282116	3	0.9029	ALIGNED
sp|P02663|CASA2_BOVIN	KPWIQPKT	333.1992+++	3	333.199	KPWIQPKT																						8.31	8.2	8.47	2160249	-0.2	0.9959	TRUE	8.38	8.24	8.59	4470431	-0.4	0.9885	TRUE	8.37	8.24	8.5	418337	-1.4	0.9597	ALIGNED
sp|P02663|CASA2_BOVIN	KPWIQP	384.7238++	2	384.724	KPWIQP																						11.14	10.86	11.32	7949446	0.7	0.987	TRUE	11.18	10.86	11.4	6091981	-1.2	0.9902	ALIGNED	11.12	11.05	11.38	984115	-1	0.8866	ALIGNED
sp|P02663|CASA2_BOVIN	KPWIQPK	448.7713++	2	448.771	KPWIQPK																						7.56	7.46	7.73	5386757	0.5	0.9907	TRUE	7.64	7.53	7.91	4938357	-0.7	0.972	TRUE	7.62	7.56	7.84	491392	-1.6	0.9236	ALIGNED
sp|P02663|CASA2_BOVIN	KPWIQPK	299.5166+++	3	299.517	KPWIQPK																						7.58	7.46	7.73	6750431	0.5	0.9882	TRUE	7.64	7.53	7.91	5090039	-0.7	0.9609	TRUE	7.64	7.56	7.84	569824	-1.3	0.9322	ALIGNED
sp|P02663|CASA2_BOVIN	WIQP	543.2926+	1	543.293	WIQP	11.58	11.47	11.62	4794497	-2.2	0.8538	ALIGNED	11.5	11.46	11.56	791477	2.5	0.8007	ALIGNED								11.55	11.26	11.72	15510910	0.5	0.9867	TRUE	11.55	11.31	11.71	18281168	0.2	0.9853	TRUE	11.54	11.32	11.7	5652238	-0.8	0.9871	ALIGNED
sp|P02663|CASA2_BOVIN	WIQPKT	386.7212++	2	386.721	WIQPKT																						8.81	8.66	8.94	7263711	0.6	0.9925	TRUE	8.85	8.69	8.99	21353690	-0.2	0.9872	TRUE	8.84	8.7	8.98	5455498	-0.8	0.9805	ALIGNED
sp|P02663|CASA2_BOVIN	WIQPK	671.3875+	1	671.388	WIQPK	7.72	7.61	7.86	38963344	-0.5	0.9474	TRUE	7.71	7.62	7.89	34310332	-1.1	0.9186	TRUE								7.75	7.66	7.87	2317328	1	0.9846	TRUE	7.78	7.7	7.97	14709517	-0.3	0.9911	TRUE	7.78	7.7	7.94	2389293	-0.6	0.9482	TRUE
sp|P02663|CASA2_BOVIN	WIQPK	336.1974++	2	336.197	WIQPK	7.72	7.61	7.86	45930472	-0.9	0.9313	TRUE	7.71	7.62	7.89	42006416	-1.4	0.8864	TRUE								7.75	7.66	7.87	20319194	0.2	0.9896	TRUE	7.78	7.7	7.97	28705526	-0.8	0.989	TRUE	7.79	7.7	7.94	9356406	-1.4	0.927	TRUE
sp|P02663|CASA2_BOVIN	IQPK	485.3082+	1	485.308	IQPK	1.26	1.23	1.4	1931564032	-1.2	0.9897	TRUE	1.27	1.21	1.43	1947859072	-1.5	0.9891	TRUE	1.26	1.21	1.38	987957568	-1.4	0.9868	TRUE	1.56	1.36	1.69	1217101	0.5	0.964	ALIGNED	1.63	1.49	1.73	4277993	-0.5	0.9795	ALIGNED	1.65	1.58	1.76	790040	-0.4	0.9679	ALIGNED
sp|P02663|CASA2_BOVIN	TKVIP	279.1865++	2	279.187	TKVIP	7.43	7.32	7.54	25380224	-0.4	0.9664	ALIGNED	7.42	7.3	7.53	18767314	-0.6	0.9246	ALIGNED	7.42	7.31	7.56	28102864	-0.6	0.9673	TRUE	7.45	7.35	7.58	1259686	-0.1	0.97	ALIGNED	7.52	7.43	7.7	4406209	-0.7	0.9676	TRUE	7.53	7.42	7.7	3360799	-1.6	0.9579	ALIGNED
sp|P02663|CASA2_BOVIN	TKVIPYVRYL	417.9202+++	3	417.92	TKVIPYVRYL																						14.37	14.17	14.53	2112240	1.5	0.9758	ALIGNED	14.41	14.3	14.61	1646668	2.2	0.9815	ALIGNED	14.36	14.23	14.55	6027976	1.4	0.9792	TRUE
sp|P02663|CASA2_BOVIN	TKVIPYVRY	380.2255+++	3	380.225	TKVIPYVRY																						11.36	11.31	11.49	413496	-1.5	0.9527	ALIGNED	11.43	11.37	11.53	507393	-0.7	0.9539	ALIGNED	11.37	11.21	11.55	5227312	-1.8	0.9638	TRUE
sp|P02663|CASA2_BOVIN	TKVIPY	360.7182++	2	360.718	TKVIPY	9.82	9.74	9.95	210524576	-0.8	0.9892	TRUE	9.82	9.72	9.92	155608448	-1.3	0.9886	TRUE	9.84	9.74	9.94	64740176	-1	0.9844	ALIGNED	9.87	9.78	10.01	4537047	-0.9	0.9835	ALIGNED	9.92	9.82	10.09	10819881	-0.6	0.9867	ALIGNED	9.91	9.8	10.07	8298911	-0.7	0.9845	ALIGNED
sp|P02663|CASA2_BOVIN	KVIPYVR	292.1885+++	3	292.188	KVIPYVR																						8.6	8.53	8.71	674858	-0.4	0.9861	ALIGNED	8.63	8.52	8.76	1874076	-0.7	0.9822	ALIGNED	8.61	8.49	8.83	991118	0.1	0.9588	TRUE
sp|P02663|CASA2_BOVIN	KVIPY	619.3814+	1	619.381	KVIPY	9.06	8.98	9.19	63048008	-0.7	0.9868	TRUE	9.04	8.95	9.17	52657172	-0.7	0.9795	TRUE	9.1	9	9.21	32449874	-0.2	0.9808	TRUE	9.12	9.03	9.25	3371529	1.6	0.9845	TRUE	9.16	9.08	9.34	11417950	1.3	0.9891	TRUE	9.15	9.06	9.32	4358630	0	0.9853	TRUE
sp|P02663|CASA2_BOVIN	KVIPY	310.1943++	2	310.194	KVIPY	9.08	8.98	9.19	83287808	-1	0.9785	TRUE	9.05	8.95	9.17	69696728	-1	0.9858	TRUE	9.1	9	9.21	38468952	-0.4	0.9704	TRUE	9.12	9.03	9.25	11624269	1.4	0.9847	TRUE	9.16	9.08	9.34	25182508	0.8	0.9791	TRUE	9.15	9.06	9.32	9973664	-0.4	0.9591	TRUE
sp|P02663|CASA2_BOVIN	VIPYVRYL	511.8053++	2	511.805	VIPYVRYL																						16.19	16.03	16.34	2474045	1.7	0.9961	TRUE								16.13	16	16.35	10539380	0.9	0.9921	ALIGNED
sp|P02663|CASA2_BOVIN	VIPYV	590.3548+	1	590.355	VIPYV	13.6	13.47	13.74	774990208	0.8	0.9929	TRUE	13.57	13.46	13.73	1065846848	-0.1	0.9936	TRUE	13.55	13.42	13.69	306152608	0.6	0.9909	TRUE															13.47	13.36	13.63	4677804	1.5	0.9648	ALIGNED
sp|P02663|CASA2_BOVIN	VIPYV	295.6811++	2	295.681	VIPYV	13.58	13.47	13.74	37286008	0.7	0.985	TRUE	13.57	13.46	13.73	50656228	-0.1	0.9836	TRUE	13.55	13.42	13.69	14190620	0.5	0.9768	TRUE	13.49	13.31	13.78	29946	1.5	0.9324	ALIGNED	13.52	13.37	13.79	80119	4	0.8205	ALIGNED	13.47	13.36	13.63	264281	0.8	0.949	ALIGNED
sp|P02663|CASA2_BOVIN	VIPYVRY	455.2633++	2	455.263	VIPYVRY																						12.58	12.49	12.69	397583	2	0.9874	ALIGNED	12.59	12.51	12.77	450504	0.9	0.9785	ALIGNED	12.55	12.47	12.72	16181047	-1.3	0.9871	TRUE
sp|P02663|CASA2_BOVIN	VIPYVR	373.7316++	2	373.732	VIPYVR	9.95	9.82	10.05	2298709	0.3	0.9173	ALIGNED	9.93	9.9	10.01	691724	0.5	0.8277	ALIGNED								10.01	9.95	10.1	1261030	0.8	0.9713	TRUE	10.03	9.95	10.19	3436709	1	0.9855	TRUE	10	9.92	10.14	5027550	0.1	0.9835	TRUE
sp|P02663|CASA2_BOVIN	VIPY	491.2864+	1	491.286	VIPY	10.13	10.06	10.24	4456559104	-1.1	0.9896	TRUE	10.11	10.04	10.22	4291075328	-1.6	0.9898	TRUE	10.14	10.06	10.25	1882582016	-1.2	0.9886	TRUE	10.17	10.1	10.39	4028708	0.9	0.9561	ALIGNED	10.21	10.1	10.36	18824138	1	0.9818	ALIGNED	10.19	10.09	10.33	14252559	1	0.9766	ALIGNED
sp|P02663|CASA2_BOVIN	IPYVR	324.1974++	2	324.197	IPYVR																						8.72	8.54	8.86	5700692	-0.2	0.9842	ALIGNED	8.76	8.55	8.93	8668956	-0.4	0.9853	TRUE	8.75	8.56	8.93	2971889	-0.9	0.9744	ALIGNED
sp|P02663|CASA2_BOVIN	IPYVRY	405.7291++	2	405.729	IPYVRY																						11.53	11.39	11.66	2920543	0.1	0.9923	ALIGNED	11.57	11.46	11.71	3332823	0.2	0.9874	TRUE	11.53	11.41	11.69	22401382	-1.1	0.9862	TRUE
sp|P02663|CASA2_BOVIN	PYV	378.2023+	1	378.202	PYV	7.13	7.06	7.24	447296032	-0.1	0.9831	TRUE	7.11	7.03	7.23	625565312	-0.6	0.9824	TRUE	7.13	7.06	7.26	563713088	-0.3	0.9806	TRUE	7.37	7.17	7.5	5131284	-0.7	0.9825	ALIGNED
sp|P02663|CASA2_BOVIN	PYVR	534.3035+	1	534.303	PYVR																						10.01	9.92	10.1	786555	1.2	0.9557	ALIGNED	10.02	9.96	10.13	2023110	2.8	0.9775	ALIGNED	10	9.94	10.14	3318983	0.6	0.9972	TRUE
sp|P02663|CASA2_BOVIN	YVRY	600.3140+	1	600.314	YVRY
sp|P02663|CASA2_BOVIN	YVRYL	713.3981+	1	713.398	YVRYL																						10.28	10.23	10.72	1264268	0.3	0.9867	TRUE	10.34	10.25	10.58	6440768	-1.6	0.9868	TRUE	10.31	10.23	10.54	10595282	-1.2	0.9848	TRUE
sp|P02663|CASA2_BOVIN	YVRYL	357.2027++	2	357.203	YVRYL																													10.34	10.25	10.58	35280116	-0.6	0.9787	TRUE	10.33	10.23	10.54	78494600	-1.1	0.9927	TRUE
sp|P02666|CASB_BOVIN	RELEE	675.3308+	1	675.331	RELEE	4.08	4.01	4.2	530926240	-0.6	0.992	TRUE	4.04	3.98	4.19	729964032	-0.9	0.9912	TRUE	4.06	3.99	4.23	738430848	-0.6	0.9928	TRUE	4.17	4.1	4.3	1438966	0.8	0.9836	TRUE	4.24	4.16	4.44	1750396	-1.4	0.9381	TRUE	4.24	4.17	4.39	23058588	-2.3	0.9886	ALIGNED
sp|P02666|CASB_BOVIN	RELEE	338.1690++	2	338.169	RELEE	4.08	4.01	4.2	768027392	0.5	0.988	TRUE	4.05	3.98	4.19	961681664	0.2	0.9901	TRUE	4.06	3.99	4.23	1143521152	-0.6	0.9915	TRUE	4.17	4.1	4.3	3800623	0.4	0.9823	TRUE	4.24	4.16	4.44	3926952	-0.9	0.9031	TRUE	4.24	4.17	4.39	65691532	-2.1	0.9925	ALIGNED
sp|P02666|CASB_BOVIN	RELEELNVPGE	642.8251++	2	642.825	RELEELNVPGE																						11.85	11.76	11.94	957229	1	0.9914	ALIGNED	11.83	11.76	11.97	415917	1.2	0.8781	ALIGNED	11.79	11.63	11.92	9692090	0	0.9944	TRUE
sp|P02666|CASB_BOVIN	RELEEL	788.4149+	1	788.415	RELEEL	9.55	9.48	9.72	1563427712	-0.5	0.993	TRUE	9.54	9.46	9.71	2256314368	-1	0.9952	TRUE	9.58	9.48	9.73	1522788992	-0.8	0.9927	TRUE	9.65	9.56	9.76	1517748	0	0.986	ALIGNED	9.68	9.6	9.79	869727	-1.1	0.9509	ALIGNED	9.64	9.57	9.84	237702976	-2.4	0.9939	TRUE
sp|P02666|CASB_BOVIN	RELEELNVPGEIVESL	953.4639++	2	953.464	RELEELNVPGEIVES[+80]L	17.63	17.5	17.8	4572895	3.7	0.9744	ALIGNED	17.6	17.45	17.77	6018936	3.2	0.984	TRUE
sp|P02666|CASB_BOVIN	RELEELN	451.7325++	2	451.733	RELEELN	7.91	7.8	8.04	8666972	0.2	0.9198	ALIGNED	7.88	7.81	8.05	11953702	-0.2	0.9364	ALIGNED	7.89	7.82	8.07	16171214	0	0.9206	ALIGNED															7.95	7.86	8.1	10407300	-1.1	0.9892	TRUE
sp|P02666|CASB_BOVIN	RELEELNVPGEI	699.3672++	2	699.367	RELEELNVPGEI	14.58	14.46	14.79	32926388	-0.6	0.9581	TRUE	14.55	14.44	14.75	37091128	-1.2	0.9665	ALIGNED	14.5	14.42	14.68	6643319	0.8	0.9461	ALIGNED
sp|P02666|CASB_BOVIN	ELEELNVPGE	564.7746++	2	564.775	ELEELNVPGE																						12.96	12.85	13.07	3350573	2.2	0.9874	ALIGNED	12.93	12.84	13.06	7363185	4.2	0.996	TRUE	12.89	12.81	13.02	11930905	3	0.9926	TRUE
sp|P02666|CASB_BOVIN	ELEEL	632.3137+	1	632.314	ELEEL																													11.05	10.96	11.19	848990784	-1.3	0.9965	TRUE	11.04	10.93	11.18	3191098880	-2.4	0.9951	ALIGNED
sp|P02666|CASB_BOVIN	ELEELN	746.3567+	1	746.357	ELEELN								8.73	8.66	8.84	2477674	-1.4	0.815	ALIGNED	8.79	8.67	8.85	1378303	-1.4	0.8018	ALIGNED	8.84	8.75	8.93	500854	1.9	0.984	ALIGNED	8.84	8.75	8.96	2060064	1.2	0.9958	ALIGNED	8.83	8.74	8.94	9085892	-0.2	0.9951	TRUE
sp|P02666|CASB_BOVIN	LEELNVPGEIVE	670.8508++	2	670.851	LEELNVPGEIVE	15.6	15.46	15.81	13581839	-0.5	0.9485	ALIGNED	15.61	15.44	15.79	12182962	0.3	0.9632	ALIGNED	15.53	15.4	15.67	9778346	0.8	0.9531	TRUE	15.5	15.37	15.7	420953	-1.2	0.8991	ALIGNED								15.41	15.3	15.64	2313117	3.7	0.9869	ALIGNED
sp|P02666|CASB_BOVIN	LEE	390.1871+	1	390.187	LEE	3.43	3.37	3.53	437299552	-0.8	0.9758	TRUE	3.42	3.28	3.65	536871424	-0.9	0.9952	ALIGNED	3.45	3.4	3.57	550651712	-1.1	0.9858	ALIGNED	3.35	3.26	3.55	10424494	-0.6	0.9767	ALIGNED								3.44	3.35	3.53	102120024	-1.2	0.9913	ALIGNED
sp|P02666|CASB_BOVIN	EELNVPGEIVE	614.3088++	2	614.309	EELNVPGEIVE	14.07	13.95	14.18	39975200	0.2	0.9749	TRUE	14.04	13.91	14.17	34263420	0.9	0.9819	ALIGNED	14.01	13.87	14.15	37420916	0	0.9653	TRUE	14.02	13.86	14.33	12582426	1.6	0.9929	TRUE	13.99	13.86	14.26	11297532	1.1	0.9964	ALIGNED	13.95	13.82	14.22	12314061	-0.4	0.9825	ALIGNED
sp|P02666|CASB_BOVIN	EELNVPGE	886.4153+	1	886.415	EELNVPGE	10.27	10.2	10.35	102103648	-0.5	0.9915	TRUE	10.24	10.17	10.34	99502200	-0.6	0.9944	TRUE								10.26	10.19	10.44	1540062	1.2	0.9912	ALIGNED	10.24	10.02	10.46	3140762	2.7	0.9573	TRUE
sp|P02666|CASB_BOVIN	EELNVPGE	443.7113++	2	443.711	EELNVPGE	10.27	10.2	10.35	46099524	-0.7	0.9975	TRUE	10.26	10.17	10.34	41705680	-1	0.9875	TRUE	10.23	10.18	10.33	20725504	-1	0.9801	TRUE	10.26	10.19	10.44	4353975	0.9	0.9777	ALIGNED	10.24	10.02	10.46	7887245	4.3	0.852	TRUE	10.23	10.17	10.39	2383101	1.9	0.913	ALIGNED
sp|P02666|CASB_BOVIN	ELNVPGEIVE	549.7875++	2	549.788	ELNVPGEIVE	13.93	13.73	14.18	27742550	-1.4	0.9241	ALIGNED	13.93	13.71	14.11	34730640	-1.8	0.9284	ALIGNED	13.86	13.63	14.16	15841349	-1.9	0.9269	ALIGNED	13.86	13.71	14.15	31730970	1.6	0.9974	TRUE	13.82	13.69	14.11	114324056	1.2	0.9983	TRUE	13.8	13.64	14.03	16769395	-0.5	0.9893	TRUE
sp|P02666|CASB_BOVIN	ELNVPGE	757.3727+	1	757.373	ELNVPGE															9.77	9.68	9.85	25485028	-0.3	0.9839	TRUE	9.8	9.69	9.91	7736937	-1.2	0.9932	ALIGNED	9.8	9.69	9.92	29021190	-1.3	0.9928	TRUE	9.78	9.7	9.93	2637118	-0.6	0.9922	TRUE
sp|P02666|CASB_BOVIN	ELNVPGE	379.1900++	2	379.19	ELNVPGE								9.75	9.7	10.08	32018178	-0.5	0.8567	TRUE	9.77	9.68	9.85	15270960	-0.8	0.9833	TRUE	9.8	9.69	9.91	7176786	-0.4	0.9842	ALIGNED	9.8	9.69	9.92	21085990	-1.2	0.99	TRUE	9.78	9.7	9.93	2995328	-0.7	0.9913	TRUE
sp|P02666|CASB_BOVIN	LNVPGEI	741.4141+	1	741.414	LNVPGEI	13.23	13.11	13.42	115558496	1.4	0.9889	TRUE	13.2	13.1	13.47	133069136	1.1	0.9918	TRUE	13.18	12.91	13.38	128142504	0.4	0.9804	TRUE
sp|P02666|CASB_BOVIN	LNVPGEIVE	969.5251+	1	969.525	LNVPGEIVE	13.52	13.43	13.77	311600192	1.2	0.9933	TRUE	13.52	13.41	13.77	304972800	0.5	0.9915	TRUE	13.5	13.24	13.74	239343936	1.4	0.9927	TRUE	13.45	13.32	13.72	9847552	2.6	0.9945	TRUE	13.43	13.25	13.69	27653800	3.1	0.9897	TRUE	13.41	13.09	13.65	5888645	2.3	0.9916	ALIGNED
sp|P02666|CASB_BOVIN	LNVPGEIVE	485.2662++	2	485.266	LNVPGEIVE	13.52	13.43	13.77	361745088	1.2	0.9957	TRUE	13.5	13.41	13.77	370269088	0.6	0.988	TRUE	13.46	13.24	13.74	308775360	1.5	0.9779	TRUE	13.47	13.32	13.72	30910096	1.8	0.9938	TRUE	13.43	13.25	13.69	59845980	2.5	0.9955	TRUE	13.41	13.09	13.65	13620256	1	0.9889	ALIGNED
sp|P02666|CASB_BOVIN	LNVPGEIVESL	585.3243++	2	585.324	LNVPGEIVESL	18.66	18.52	18.9	19307792	0.7	0.9927	TRUE	18.66	18.52	18.88	16667051	0.3	0.9869	TRUE	18.57	18.43	18.7	4589437	2	0.9843	ALIGNED															18.37	18.24	18.57	580911	4.5	0.9935	ALIGNED
sp|P02666|CASB_BOVIN	LNVPGE	628.3301+	1	628.33	LNVPGE	9.31	9.2	9.76	1530313216	-0.4	0.9944	TRUE	9.3	9.2	9.43	1444458752	-0.7	0.992	TRUE	9.28	9.18	9.39	1237899520	-0.9	0.9909	TRUE	9.32	9.25	9.47	9093904	0.9	0.9922	TRUE	9.32	9.26	9.45	22754754	1.6	0.9902	TRUE	9.31	9.21	9.42	28652254	0.7	0.9842	TRUE
sp|P02666|CASB_BOVIN	LNVPGE	314.6687++	2	314.669	LNVPGE	9.31	9.2	9.76	171858608	-1	0.9723	TRUE	9.3	9.2	9.43	189226208	-1.2	0.9835	TRUE	9.29	9.18	9.39	146048992	-1.1	0.961	TRUE	9.32	9.25	9.47	3629309	0.2	0.98	TRUE	9.32	9.26	9.45	6945400	1	0.984	TRUE	9.31	9.21	9.42	8775569	0.1	0.9771	TRUE
sp|P02666|CASB_BOVIN	LNVPG	499.2875+	1	499.287	LNVPG	8.51	8.44	8.63	49898724	-0.6	0.9123	ALIGNED	8.5	8.42	8.63	34506184	-0.6	0.9784	TRUE	8.52	8.45	8.63	8589107	-2	0.9012	ALIGNED	8.59	8.5	8.7	30817002	0.3	0.9873	TRUE	8.6	8.53	8.72	55805600	0.1	0.9841	ALIGNED	8.6	8.49	8.77	2370368	0.6	0.9498	ALIGNED
sp|P02666|CASB_BOVIN	LNVPGEIVESL	625.3074++	2	625.307	LNVPGEIVES[+80]L	16.56	16.39	16.89	158045616	-1.1	0.9978	TRUE	16.55	16.38	16.88	169646048	-1.2	0.9991	TRUE	16.48	16.28	16.79	169654672	-0.5	0.9969	TRUE	16.42	16.36	16.74	241926	0.2	0.8902	ALIGNED	16.33	16.22	16.65	1318044	0.1	0.9578	ALIGNED	16.29	16.14	16.6	3084883	1.2	0.9976	ALIGNED
sp|P02666|CASB_BOVIN	NVPGE	515.2460+	1	515.246	NVPGE	4.33	4.25	4.57	589855360	0	0.979	TRUE	4.31	4.23	4.57	825807552	-0.5	0.983	TRUE	4.36	4.26	4.57	813454912	-0.2	0.9831	TRUE	4.38	4.29	4.63	46478704	-0.3	0.9866	TRUE	4.43	4.31	4.68	156358656	-0.9	0.9861	TRUE	4.42	4.33	4.67	56568940	-0.1	0.9891	TRUE
sp|P02666|CASB_BOVIN	NVPGEIVESL	568.7654++	2	568.765	NVPGEIVES[+80]L	14.48	14.29	14.89	177625904	-1.2	0.9916	TRUE	14.48	14.28	14.86	231608640	-1.5	0.9903	TRUE	14.36	14.23	14.82	230701008	-2.7	0.9861	TRUE	14.36	14.22	14.76	1400655	1.9	0.946	ALIGNED	14.28	14.13	14.65	7132039	3.1	0.9847	ALIGNED	14.25	14.1	14.54	10674065	1.5	0.9888	ALIGNED
sp|P02666|CASB_BOVIN	NVPG	386.2034+	1	386.203	NVPG	2.86	2.59	3.18	19177666	-0.1	0.9207	ALIGNED	2.88	2.54	3.07	16918254	-0.9	0.9086	TRUE								2.92	2.78	3.18	16237970	0.4	0.9783	ALIGNED	2.99	2.82	3.26	44930664	-0.6	0.9806	ALIGNED	2.98	2.88	3.25	1821875	-0.3	0.8731	ALIGNED
sp|P02666|CASB_BOVIN	VPG	272.1605+	1	272.16	VPG	1.94	1.81	2.09	11288952	-1.4	0.919	ALIGNED	1.9	1.79	2.03	7637472	-1.7	0.9092	ALIGNED	1.98	1.81	2.06	4681780	-1.3	0.9132	ALIGNED	1.96	1.87	2.49	10006714	0	0.9831	TRUE	2.05	1.97	2.52	24834416	-0.9	0.975	TRUE	2.05	1.91	2.56	1884996	0.2	0.9868	TRUE
sp|P02666|CASB_BOVIN	VPGE	401.2031+	1	401.203	VPGE	3.35	3.28	3.64	45640736	-0.5	0.9307	TRUE	3.34	3.26	3.61	27421438	-0.8	0.9226	ALIGNED	3.36	3.31	3.6	15148696	0	0.9416	ALIGNED	3.4	3.33	3.71	38041136	-0.1	0.9827	ALIGNED	3.46	3.38	3.77	75000344	-1.2	0.9814	ALIGNED	3.45	3.38	3.74	17248826	-1.2	0.981	ALIGNED
sp|P02666|CASB_BOVIN	VPGEIVE	742.3981+	1	742.398	VPGEIVE	9.58	9.41	9.95	142934016	-0.1	0.9881	TRUE	9.59	9.38	9.89	197426832	-0.5	0.9925	TRUE	9.58	9.47	9.92	49275968	0.8	0.985	ALIGNED	9.62	9.51	10.06	93785328	0.1	0.9927	TRUE	9.65	9.51	10.08	435566816	-0.4	0.9956	TRUE	9.61	9.5	10.06	78517160	-1.8	0.9906	TRUE
sp|P02666|CASB_BOVIN	VPGEIVE	371.7027++	2	371.703	VPGEIVE	9.57	9.41	9.95	12810863	-0.1	0.9811	TRUE	9.58	9.38	9.89	18294508	-0.2	0.9912	TRUE								9.6	9.51	10.06	17558678	0	0.9911	TRUE	9.62	9.51	10.08	68164496	-0.6	0.9906	TRUE	9.63	9.5	10.06	11872125	-2.5	0.978	TRUE
sp|P02666|CASB_BOVIN	PGEIVE	643.3297+	1	643.33	PGEIVE	13.51	13.4	13.76	51586572	0	0.9632	TRUE	13.5	13.39	13.72	50151912	-0.5	0.9662	TRUE	13.47	13.31	13.68	41595012	0.5	0.9763	TRUE	10.4	10.2	11	16573823	0.6	0.9868	TRUE	10.38	10.22	11.04	45545244	0.3	0.9898	TRUE	10.39	10.23	10.68	12065914	-0.4	0.9898	TRUE
sp|P02666|CASB_BOVIN	EIVE	489.2555+	1	489.256	EIVE	5.97	5.88	6.07	208892720	0	0.9878	ALIGNED	5.95	5.87	6.07	164832800	-0.6	0.9816	ALIGNED	5.97	5.45	6	20154166	-3.8	0.9606	ALIGNED								6.02	5.93	6.14	1908058112	-1.5	0.9942	ALIGNED	6.03	5.91	6.15	46146744	-0.3	0.99	TRUE
sp|P02666|CASB_BOVIN	IVE	360.2129+	1	360.213	IVE	4.29	4.22	4.37	73804224	-0.7	0.9587	TRUE	4.28	4.21	4.34	77849032	-0.9	0.9696	ALIGNED	4.31	4.24	4.38	67829784	-0.7	0.9655	TRUE	4.5	4.42	4.59	286922	-1.4	0.9574	ALIGNED	4.43	4.24	4.5	1189476	-1.7	0.9098	ALIGNED	4.43	4.39	4.57	295422	-0.7	0.8178	ALIGNED
sp|P02666|CASB_BOVIN	IVES	447.2449+	1	447.245	IVES	3.34	3.08	3.52	95663408	2.2	0.8761	ALIGNED	3.33	3.05	3.5	97452208	1.7	0.8746	ALIGNED	3.35	3.3	3.51	77288088	2.2	0.8879	ALIGNED								3.44	3.24	3.59	7283741	-0.7	0.959	ALIGNED	3.45	3.38	3.6	687483	-0.1	0.948	TRUE
sp|P02666|CASB_BOVIN	IVES	527.2113+	1	527.211	IVES[+80]																						2.99	2.92	3.15	1241141	0.8	0.9759	TRUE	3.03	2.97	3.17	2662822	0.4	0.9791	ALIGNED	3.03	2.98	3.12	92083	1.8	0.8733	ALIGNED
sp|P02666|CASB_BOVIN	SLSSSEESITR	718.2432++	2	718.243	SLS[+80]S[+80]S[+80]EESITR																						8.19	8.1	8.37	19142992	0.5	0.9962	TRUE	8.13	8.04	8.26	112804784	-1.3	0.9955	TRUE	8.11	8.02	8.23	4643597	-0.7	0.989	TRUE
sp|P02666|CASB_BOVIN	SLSSSEESITR	479.1645+++	3	479.165	SLS[+80]S[+80]S[+80]EESITR																						8.19	8.1	8.37	865609	0.8	0.9991	TRUE	8.13	8.04	8.26	5216968	-1.4	0.9865	TRUE	8.13	8.02	8.23	195469	-0.3	0.9254	TRUE
sp|P02666|CASB_BOVIN	SLSSSEESITR	718.2432++	2	718.243	S[+80]LSS[+80]S[+80]EESITR																						9.17	9.08	9.37	1425417	2	0.9846	TRUE	9.09	9.02	9.25	3365914	1	0.9891	ALIGNED	9.07	9.02	9.18	238584	-1.2	0.9673	ALIGNED
sp|P02666|CASB_BOVIN	SLSSSEESITR	678.2600++	2	678.26	SLSS[+80]S[+80]EESITR																						8.44	8.22	8.54	880036	-0.2	0.9818	ALIGNED	8.39	8.23	8.51	5396389	0.1	0.9846	TRUE	8.38	8.32	8.46	1132370	-0.2	0.9905	ALIGNED
sp|P02666|CASB_BOVIN	SLSSSEES	533.1268++	2	533.127	SLS[+80]S[+80]S[+80]EES																						3.11	2.7	4	13443488	0	0.9918	ALIGNED	2.89	2.7	3.31	45147728	-0.5	0.9975	TRUE	2.94	2.76	3.21	168453	0.1	0.9465	ALIGNED
sp|P02666|CASB_BOVIN	SLSSSEESITR	758.2263++	2	758.226	S[+80]LS[+80]S[+80]S[+80]EESITR																						7.98	7.58	9.19	107894744	0.2	0.9946	TRUE	7.68	7.47	8.15	418213280	-0.6	0.9976	TRUE	7.71	7.47	8.24	10571645	-0.8	0.9921	ALIGNED
sp|P02666|CASB_BOVIN	SLSSSEESITR	505.8200+++	3	505.82	S[+80]LS[+80]S[+80]S[+80]EESITR																						7.95	7.58	9.19	6973751	0.5	0.991	TRUE	7.69	7.47	8.15	27246670	-0.2	0.9948	TRUE
sp|P02666|CASB_BOVIN	LSSSEESITR	674.7272++	2	674.727	LS[+80]S[+80]S[+80]EESITR																						7.15	7.07	7.4	5456194	0.2	0.9879	TRUE	7.1	7.03	7.28	23410846	-0.9	0.9977	TRUE	7.11	7.03	7.21	190843	-0.5	0.8933	ALIGNED
sp|P02666|CASB_BOVIN	LSSSEESITR	634.7440++	2	634.744	LSS[+80]S[+80]EESITR																						7.83	7.75	7.94	1124417	1	0.9761	ALIGNED	7.8	7.72	7.87	2947882	-0.1	0.9989	TRUE	7.78	7.72	7.86	396904	0.3	0.9588	ALIGNED
sp|P02666|CASB_BOVIN	SSSEESITR	618.1851++	2	618.185	S[+80]S[+80]S[+80]EESITR																						5.28	5.19	5.53	2922976	0	0.9898	ALIGNED	5.24	5.17	5.39	22232620	-0.7	0.9968	TRUE	5.24	5.14	5.43	3863507	-2.1	0.986	ALIGNED
sp|P02666|CASB_BOVIN	SSSEESITRIN	731.7486++	2	731.749	S[+80]S[+80]S[+80]EESITRIN																																				9.35	9.24	9.5	1811374	0	0.9873	TRUE
sp|P02666|CASB_BOVIN	SSSEESITR	578.2020++	2	578.202	SS[+80]S[+80]EESITR																						5.42	5.24	5.51	513648	1	0.9833	ALIGNED	5.42	5.34	5.5	4115994	-0.6	0.9827	TRUE	5.41	5.33	5.5	2321980	-0.8	0.9847	ALIGNED
sp|P02666|CASB_BOVIN	SITR	238.6450++	2	238.645	SITR																						1.86	1.7	1.93	1295462	1.5	0.9294	TRUE	1.96	1.88	2.03	4613772	-0.6	0.959	TRUE
sp|P02666|CASB_BOVIN	ITRIN	308.6925++	2	308.692	ITRIN																													4.73	4.67	4.83	611300	-1.6	0.8538	ALIGNED	4.73	4.66	4.88	4275585	-2.1	0.9785	TRUE
sp|P02666|CASB_BOVIN	INKKIE	372.7343++	2	372.734	INKKIE																													3.32	3.26	3.42	4948188	-2	0.9774	ALIGNED	3.33	3.26	3.51	11776833	-1.1	0.9903	TRUE
sp|P02666|CASB_BOVIN	KKIEKF	264.8375+++	3	264.837	KKIEKF																						3.96	3.88	4.28	3872385	0.1	0.9884	ALIGNED	4.11	4.02	4.4	3690776	-0.8	0.9717	ALIGNED	4.11	4.02	4.39	10561567	-1.8	0.9867	TRUE
sp|P02666|CASB_BOVIN	KIE	389.2395+	1	389.239	KIE	2.74	2.67	2.92	8039752	-0.6	0.9396	ALIGNED	2.74	2.64	2.91	10903134	-1.2	0.9345	ALIGNED	2.72	2.67	2.91	5729113	-1.1	0.925	ALIGNED	2.86	2.76	2.97	3878103	-0.4	0.9767	TRUE	2.92	2.71	3.03	5597653	-1.3	0.9745	TRUE
sp|P02666|CASB_BOVIN	KIEK	517.3344+	1	517.334	KIEK	0.73	0.67	0.79	959555072	-1	0.99	TRUE	0.73	0.66	0.79	849249152	-1.5	0.991	ALIGNED	0.74	0.69	0.82	753304704	-1.4	0.9894	ALIGNED
sp|P02666|CASB_BOVIN	KIEK	259.1708++	2	259.171	KIEK	0.72	0.67	0.79	640405696	-0.6	0.9843	TRUE	0.73	0.66	0.79	550205056	-0.8	0.9765	ALIGNED	0.73	0.69	0.82	641556736	-0.8	0.9785	ALIGNED
sp|P02666|CASB_BOVIN	KIEKF	332.7051++	2	332.705	KIEKF	5.71	5.61	5.84	6083666	-0.2	0.975	ALIGNED	5.71	5.64	5.83	6564253	-0.4	0.9684	ALIGNED	5.75	5.64	5.86	2921100	-0.5	0.94	ALIGNED								5.84	5.76	6	3584779	0.2	0.9809	ALIGNED	5.84	5.75	6.02	7044359	-1.6	0.9817	TRUE
sp|P02666|CASB_BOVIN	KIEKFQSEE	609.2761++	2	609.276	KIEKFQS[+80]EE																						6.73	6.67	6.85	2909175	1	0.9952	ALIGNED	6.75	6.68	6.86	1781736	-0.6	0.9914	ALIGNED	6.75	6.69	6.92	5756690	-0.1	0.9905	TRUE
sp|P02666|CASB_BOVIN	IEK	389.2395+	1	389.239	IEK	3.78	3.73	3.87	14572412	0.6	0.9464	ALIGNED	3.65	3.53	3.72	37521848	-0.4	0.9781	ALIGNED	3.66	3.57	3.73	30824822	-0.4	0.9785	TRUE	3.72	3.65	3.88	506058	-0.6	0.933	ALIGNED	3.79	3.7	4.02	1301737	-0.9	0.9468	ALIGNED	3.87	3.82	4.05	66796	-0.9	0.8633	ALIGNED
sp|P02666|CASB_BOVIN	IEKFQSE	480.7073++	2	480.707	IEKFQS[+80]E																						6.95	6.88	7.06	4470348	0.2	0.9935	TRUE	6.94	6.88	7.08	4135269	0.1	0.9834	TRUE	6.95	6.89	7.11	5520780	-0.6	0.9917	TRUE
sp|P02666|CASB_BOVIN	IEKFQ	332.6869++	2	332.687	IEKFQ	6.15	6.08	6.25	21560688	-0.2	0.9854	TRUE	6.14	6.06	6.24	18347120	-0.9	0.9733	TRUE	6.16	6.08	6.26	20834190	-0.4	0.9719	TRUE	6.18	6.09	6.28	1947143	-0.2	0.992	TRUE	6.22	6.1	6.37	3496414	0.3	0.9846	ALIGNED	6.23	6.16	6.38	3957288	-0.1	0.9869	TRUE
sp|P02666|CASB_BOVIN	IEKFQSEEQQQ	737.3165++	2	737.317	IEKFQS[+80]EEQQQ	7.1	7.04	7.21	42436344	0	0.9894	TRUE	7.11	7.03	7.22	38022368	-0.4	0.9871	ALIGNED	7.09	7.03	7.19	44220284	-0.4	0.9859	TRUE	7.14	7.09	7.2	80693	0.6	0.9798	ALIGNED	7.11	7.08	7.17	130681	-0.2	0.9759	ALIGNED	7.11	7.06	7.22	714002	-0.6	0.9835	ALIGNED
sp|P02666|CASB_BOVIN	IEKFQSEEQQ	673.2872++	2	673.287	IEKFQS[+80]EEQQ	7.07	7	7.14	18483212	-0.3	0.9716	ALIGNED	7.06	6.99	7.13	17154732	-0.6	0.99	ALIGNED	7.06	6.97	7.16	53827220	-0.6	0.993	TRUE	7.08	7.02	7.18	403795	-0.4	0.959	ALIGNED	7.07	6.98	7.16	1185559	-4.2	0.9368	ALIGNED
sp|P02666|CASB_BOVIN	KFQ	422.2398+	1	422.24	KFQ	1.79	1.65	1.89	5359223	-1.4	0.8853	ALIGNED	1.76	1.64	1.85	5645570	-1.9	0.8636	ALIGNED	1.79	1.66	1.87	2860040	-1.7	0.8146	ALIGNED	1.87	1.76	1.98	1128965	0.7	0.9713	TRUE	1.96	1.87	2.09	5074459	-0.3	0.9775	ALIGNED	1.98	1.89	2.14	971805	0.2	0.9663	TRUE
sp|P02666|CASB_BOVIN	KFQSEEQQ	552.7159++	2	552.716	KFQS[+80]EEQ[+1]Q																						5.01	4.94	5.12	3491215	1.5	0.9953	ALIGNED	5.03	4.93	5.12	10652204	-0.5	0.9872	TRUE	5.05	4.95	5.13	4557091	-1	0.9891	ALIGNED
sp|P02666|CASB_BOVIN	KFQSEEQQ	552.2239++	2	552.224	KFQS[+80]EEQQ	4.6	4.54	4.67	11160763	-0.6	0.9946	TRUE	4.58	4.54	4.65	10615302	-0.9	0.987	ALIGNED	4.62	4.56	4.69	36002292	-0.4	0.9779	TRUE	4.65	4.57	4.76	17042620	-1.2	0.9963	TRUE	4.67	4.59	4.76	36458600	-1.7	0.993	TRUE	4.66	4.59	4.77	28226212	-2.4	0.995	TRUE
sp|P02666|CASB_BOVIN	KFQSEEQQQ	616.2532++	2	616.253	KFQS[+80]EEQQQ	4.76	4.71	4.85	20331258	-0.6	0.9908	TRUE	4.75	4.7	4.85	21863718	-0.7	0.9847	TRUE	4.77	4.71	4.85	29677058	-0.6	0.9907	TRUE	4.8	4.67	4.96	6211638	-0.7	0.9878	TRUE	4.81	4.7	4.99	14049788	-2.2	0.9702	TRUE	4.82	4.67	4.99	16799026	-2.9	0.9232	TRUE
sp|P02666|CASB_BOVIN	KFQSEEQQ	552.7159++	2	552.716	KFQS[+80]EEQQ[+1]																						5.17	5.12	5.32	1640372	0.8	0.97	ALIGNED	5.18	5.12	5.31	5717516	-0.7	0.9849	TRUE	5.19	5.13	5.3	2869695	-1.4	0.9839	ALIGNED
sp|P02666|CASB_BOVIN	KFQSEEQQQTE	731.2983++	2	731.298	KFQS[+80]EEQQQTE																						5.74	5.67	5.83	2984555	0.4	0.9926	ALIGNED								5.73	5.64	5.84	4920395	-0.6	0.9959	TRUE
sp|P02666|CASB_BOVIN	KFQSEEQQQTEDELQD	687.9477+++	3	687.948	KFQS[+80]EEQQQTEDELQD																						9.64	9.56	9.78	664077	0.1	0.9852	ALIGNED	9.59	9.51	9.76	7972444	-0.8	0.9874	TRUE	9.56	9.44	9.75	6638850	-4.8	0.937	ALIGNED
sp|P02666|CASB_BOVIN	KFQSEE	424.6573++	2	424.657	KFQ[+1]S[+80]EE																						5.14	5.07	5.26	2150193	0.7	0.9792	ALIGNED	5.15	5.08	5.28	6944537	-0.4	0.9794	TRUE	5.16	5.09	5.28	1992688	-0.8	0.9916	ALIGNED
sp|P02666|CASB_BOVIN	KFQSE	359.6440++	2	359.644	KFQS[+80]E	3.64	3.61	3.68	2051943	0.2	0.898	ALIGNED	3.62	3.51	3.69	1730808	0.8	0.8404	ALIGNED								3.67	3.6	3.8	10122559	-1.5	0.9864	TRUE	3.72	3.65	3.84	11360471	-2.1	0.9847	TRUE	3.74	3.65	3.86	3703827	-0.4	0.9816	ALIGNED
sp|P02666|CASB_BOVIN	KFQSEEQQQTED	788.8118++	2	788.812	KFQS[+80]EEQQQTED								5.83	5.78	5.86	741834	-1	0.9585	ALIGNED								5.86	5.79	5.97	6020655	0.5	0.9951	TRUE	5.85	5.78	5.94	13798042	0.5	0.9911	TRUE	5.84	5.78	5.95	6907163	-1.3	0.9957	ALIGNED
sp|P02666|CASB_BOVIN	KFQSEE	847.3233+	1	847.323	KFQS[+80]EE	4.61	4.56	4.69	8629652	-0.6	0.9233	ALIGNED	4.6	4.54	4.68	6945016	-1.4	0.9025	ALIGNED	4.63	4.58	4.69	2502391	-0.4	0.9223	ALIGNED	4.67	4.58	4.78	10141509	-1	0.9916	TRUE	4.71	4.6	4.81	25307192	-1.7	0.9923	TRUE	4.7	4.61	4.82	7901920	-2.1	0.9909	TRUE
sp|P02666|CASB_BOVIN	KFQSEE	424.1653++	2	424.165	KFQS[+80]EE	4.62	4.56	4.69	5322256	-2.1	0.8218	ALIGNED	4.61	4.54	4.68	4307532	-2.5	0.9502	ALIGNED	4.62	4.58	4.69	2575695	-1.3	0.9597	ALIGNED	4.67	4.58	4.78	26702004	-1.6	0.9955	TRUE	4.69	4.6	4.81	53784456	-2.2	0.9939	TRUE	4.7	4.61	4.82	24259612	-2.3	0.9975	TRUE
sp|P02666|CASB_BOVIN	KFQSEEQ	488.1946++	2	488.195	KFQS[+80]EEQ																						4.41	4.35	4.53	2568088	-0.4	0.9899	TRUE	4.43	4.34	4.53	6986273	-1.2	0.9978	TRUE	4.43	4.32	4.54	2870688	-0.8	0.9883	ALIGNED
sp|P02666|CASB_BOVIN	FQSEEQQ	488.6684++	2	488.668	FQ[+1]S[+80]EEQQ																						4.96	4.89	5.17	5883224	0.9	0.9919	ALIGNED	5.03	4.99	5.12	9412362	-0.8	0.99	TRUE
sp|P02666|CASB_BOVIN	FQSEE	720.2124+	1	720.212	FQ[+1]S[+80]EE																						5.03	4.96	5.16	5413216	1.4	0.9908	ALIGNED	5.03	4.96	5.13	44275172	-0.7	0.9904	ALIGNED	5.04	4.96	5.14	2798545	-1.2	0.9872	TRUE
sp|P02666|CASB_BOVIN	FQSEEQQ	488.6684++	2	488.668	FQS[+80]EEQQ[+1]																													4.94	4.88	5	15462403	-1.5	0.9952	TRUE	4.95	4.88	5.13	5826384	-1.3	0.9865	TRUE
sp|P02666|CASB_BOVIN	FQSEEQQQTED	724.7643++	2	724.764	FQS[+80]EEQQQTED								5.63	5.54	5.69	2827109	1.7	0.9377	ALIGNED								5.62	5.54	5.72	4930566	0.6	0.9967	TRUE	5.59	5.52	5.68	12044043	-1.5	0.9906	TRUE	5.58	5.52	5.68	3791341	-1.1	0.9914	ALIGNED
sp|P02666|CASB_BOVIN	FQSEEQQ	976.3295+	1	976.33	FQS[+80]EEQ[+1]Q																						4.73	4.67	4.84	1923006	-0.3	0.9892	TRUE	4.74	4.66	4.83	12038104	-0.9	0.9908	TRUE	4.74	4.67	4.81	721446	-1.4	0.9803	ALIGNED
sp|P02666|CASB_BOVIN	FQSEEQQ	488.6684++	2	488.668	FQS[+80]EEQ[+1]Q								4.73	4.67	4.8	1580592	-0.3	0.9614	ALIGNED								4.73	4.67	4.84	7654711	-0.7	0.9959	TRUE	4.74	4.66	4.83	36803540	-1.3	0.9949	TRUE	4.73	4.67	4.81	3855818	-2	0.9885	ALIGNED
sp|P02666|CASB_BOVIN	FQSEEQ	847.2870+	1	847.287	FQS[+80]EEQ	4.13	4.07	4.23	67493784	-0.4	0.9917	TRUE	4.14	4.07	4.23	78499808	-0.8	0.9889	TRUE	4.13	4.07	4.24	74241440	-0.5	0.9933	TRUE	4.14	4.06	4.26	1989156	1.4	0.9966	TRUE	4.13	4.07	4.24	11795894	-0.9	0.9949	TRUE	4.13	4.07	4.23	1162262	-2.2	0.9824	ALIGNED
sp|P02666|CASB_BOVIN	FQSEEQ	424.1471++	2	424.147	FQS[+80]EEQ	4.13	4.07	4.23	47217616	-0.6	0.982	TRUE	4.14	4.07	4.23	48271660	-0.9	0.9937	TRUE	4.14	4.07	4.24	58900160	-0.6	0.9934	TRUE	4.14	4.06	4.26	4989525	0.7	0.9982	TRUE	4.13	4.07	4.24	20468862	-1.3	0.9938	TRUE	4.13	4.07	4.23	2187751	-2.6	0.9895	ALIGNED
sp|P02666|CASB_BOVIN	FQSEEQQQTEDELQDKIHPF	852.7024+++	3	852.702	FQS[+80]EEQQQTEDELQDKIHPF	15.23	15.12	15.36	60062524	-1.2	0.9806	TRUE	15.22	15.11	15.34	44936652	-2.1	0.9786	TRUE	15.12	15.07	15.28	10001707	-0.9	0.9598	ALIGNED								15.08	15.01	15.16	39863	0.8	0.8384	ALIGNED	15.07	14.89	15.1	326955	2.8	0.9382	ALIGNED
sp|P02666|CASB_BOVIN	FQSEE	640.2461+	1	640.246	FQ[+1]SEE
sp|P02666|CASB_BOVIN	FQSEEQQQT	603.2215++	2	603.222	FQS[+80]EEQ[+1]QQT																						5.59	5.48	5.7	1936522	0.2	0.9969	ALIGNED	5.57	5.45	5.64	6001513	-0.8	0.988	TRUE	5.57	5.44	5.65	554934	1	0.9301	ALIGNED
sp|P02666|CASB_BOVIN	FQSEEQQQ	552.6977++	2	552.698	FQS[+80]EEQQ[+1]Q																						4.85	4.78	4.99	4698194	-0.1	0.997	ALIGNED	4.84	4.77	4.96	18069460	-1.1	0.9971	TRUE	4.88	4.78	4.98	3269725	-1.5	0.9954	ALIGNED
sp|P02666|CASB_BOVIN	FQSEEQQQTEDELQDK	1031.4179++	2	1031.42	FQS[+80]EEQQQTEDELQDK	9.72	9.65	9.83	129744080	0.6	0.9951	TRUE	9.7	9.63	9.8	116686528	1	0.9998	TRUE	9.69	9.62	9.8	45763848	1.3	0.9937	TRUE	9.62	9.57	9.77	247781	0.9	0.9986	ALIGNED	9.59	9.51	9.76	3622043	-0.4	0.964	ALIGNED
sp|P02666|CASB_BOVIN	FQSEEQQQTEDELQDK	687.9477+++	3	687.948	FQS[+80]EEQQQTEDELQDK	9.72	9.65	9.83	225612240	0	0.9969	TRUE	9.71	9.63	9.8	209079424	0.3	0.9942	TRUE	9.69	9.62	9.8	93006952	0.2	0.9989	TRUE	9.62	9.57	9.77	622496	0.2	0.9972	ALIGNED	9.59	9.51	9.76	7972452	-0.8	0.9874	ALIGNED	9.56	9.44	9.76	6709171	-4.5	0.9351	ALIGNED
sp|P02666|CASB_BOVIN	FQSEEQQQ	1103.4041+	1	1103.4	FQS[+80]EEQQQ	4.49	4.44	4.59	243093328	0.2	0.9922	TRUE	4.5	4.43	4.58	231746544	-0.6	0.993	TRUE	4.51	4.44	4.59	193080880	-0.2	0.9944	TRUE	4.5	4.42	4.6	811080	-0.2	0.9886	TRUE	4.49	4.34	4.58	1591176	0	0.9925	TRUE	4.49	4.34	4.59	585973	0.6	0.9904	TRUE
sp|P02666|CASB_BOVIN	FQSEEQQQ	552.2057++	2	552.206	FQS[+80]EEQQQ	4.49	4.44	4.59	396030976	-0.4	0.9946	TRUE	4.5	4.43	4.58	349506016	-1.1	0.9958	TRUE	4.49	4.44	4.59	297041120	-0.7	0.9924	TRUE	4.5	4.42	4.6	12315226	-0.6	0.9972	TRUE	4.49	4.34	4.58	24094900	-2.2	0.916	TRUE	4.49	4.34	4.59	13881248	-0.4	0.974	TRUE
sp|P02666|CASB_BOVIN	FQSEE	719.2284+	1	719.228	FQS[+80]EE	4.34	4.29	4.47	45718964	-0.5	0.988	TRUE	4.36	4.29	4.44	35775984	-1	0.9905	ALIGNED	4.37	4.3	4.44	10047416	-0.5	0.9866	ALIGNED	4.36	4.29	4.47	76707984	-1.1	0.9958	TRUE	4.35	4.3	4.46	307276672	-1.8	0.9948	TRUE	4.36	4.29	4.45	25225130	-1	0.9938	ALIGNED
sp|P02666|CASB_BOVIN	FQSEE	360.1178++	2	360.118	FQS[+80]EE								4.36	4.29	4.44	2112146	-1.5	0.8439	ALIGNED								4.36	4.29	4.47	15006573	-1.4	0.991	TRUE	4.35	4.3	4.46	37809492	-2.2	0.99	TRUE	4.36	4.29	4.45	3951942	-1.5	0.9928	ALIGNED
sp|P02666|CASB_BOVIN	FQSEEQQQTEDE	789.2856++	2	789.286	FQS[+80]EEQQQTEDE	6.22	6.16	6.3	39826368	0	0.9956	TRUE	6.22	6.15	6.31	27580748	-0.6	0.9983	TRUE	6.2	6.15	6.29	12485306	0.5	0.992	ALIGNED
sp|P02666|CASB_BOVIN	FQSE	510.2195+	1	510.219	FQSE	3.71	3.64	3.77	5204105	0.6	0.8719	ALIGNED	3.67	3.63	3.76	4327403	0	0.8674	ALIGNED	3.7	3.66	3.78	2221273	-0.3	0.9461	ALIGNED	3.72	3.65	3.83	6508530	-0.8	0.9742	ALIGNED	3.79	3.71	3.89	26631884	-1.5	0.9815	TRUE	3.8	3.73	3.9	1620871	-1.4	0.9603	ALIGNED
sp|P02666|CASB_BOVIN	FQSEEQQQTEDEL	845.8276++	2	845.828	FQS[+80]EEQQQTEDEL	10.72	10.64	10.82	126962088	0	0.9976	TRUE	10.71	10.64	10.82	107395984	-0.2	0.9949	TRUE	10.67	10.58	10.77	64603756	0.2	0.9951	TRUE								10.6	10.56	10.66	120252	1.6	0.9396	ALIGNED
sp|P02666|CASB_BOVIN	FQSEE	639.2620+	1	639.262	FQSEE	4.5	4.42	4.57	3856921	-3.3	0.9044	ALIGNED	4.49	4.43	4.56	4713968	-3	0.9328	ALIGNED								4.59	4.51	4.68	7155703	-0.5	0.9886	TRUE	4.62	4.54	4.72	38922740	-1.3	0.9879	TRUE	4.61	4.51	4.7	1944688	-0.8	0.9917	ALIGNED
sp|P02666|CASB_BOVIN	FQSE	511.2035+	1	511.203	FQ[+1]SE																						4.05	3.99	4.17	644777	0.7	0.9779	ALIGNED	4.1	4.01	4.2	4343860	0.3	0.9293	TRUE	4.11	4.05	4.17	166534	-2	0.867	ALIGNED
sp|P02666|CASB_BOVIN	FQSEEQQ	975.3455+	1	975.346	FQS[+80]EEQQ	4.35	4.29	4.46	91578792	-0.4	0.989	TRUE	4.34	4.28	4.45	89659120	-0.8	0.9966	TRUE	4.35	4.29	4.45	219525152	-0.5	0.9934	TRUE	4.34	4.29	4.45	6293553	-1.1	0.9952	TRUE	4.34	4.28	4.43	23394040	-1.8	0.9929	TRUE	4.34	4.28	4.43	5260784	-1	0.9852	TRUE
sp|P02666|CASB_BOVIN	FQSEEQQ	488.1764++	2	488.176	FQS[+80]EEQQ	4.35	4.29	4.46	120123368	-0.1	0.9978	TRUE	4.34	4.28	4.45	113263216	-0.6	0.9924	TRUE	4.35	4.29	4.45	350706624	-0.4	0.9966	TRUE	4.34	4.29	4.45	36593272	-0.8	0.996	TRUE	4.34	4.28	4.43	97457952	-1.6	0.9987	TRUE	4.34	4.28	4.43	34275300	-1.3	0.9952	TRUE
sp|P02666|CASB_BOVIN	FQSEEQQQ	552.6977++	2	552.698	FQS[+80]EEQ[+1]QQ																													5.07	5.03	5.13	4582169	0.4	0.9845	TRUE
sp|P02666|CASB_BOVIN	QSE	444.1014+	1	444.101	Q[+1]S[+80]E																						0.69	0.56	0.87	10211237	-0.2	0.976	TRUE	0.81	0.77	0.87	24404594	-1.9	0.9872	ALIGNED
sp|P02666|CASB_BOVIN	QSEEQ	701.2026+	1	701.203	Q[+1]S[+80]EEQ																						0.89	0.82	0.98	2443315	-0.1	0.985	ALIGNED	0.94	0.86	1.02	12297334	-1.1	0.9892	TRUE	1.07	1.02	1.21	583486	-0.5	0.961	ALIGNED
sp|P02666|CASB_BOVIN	SEEQQQ	828.2771+	1	828.277	S[+80]EEQQQ								0.84	0.77	0.94	4158761	-1.3	0.9271	ALIGNED	0.89	0.79	0.96	4741627	-1	0.9477	ALIGNED	0.87	0.76	0.98	3718010	-0.7	0.9921	ALIGNED	0.87	0.84	1.02	12819087	-1.5	0.9809	TRUE	0.92	0.8	1.05	1841392	-2.6	0.9407	ALIGNED
sp|P02666|CASB_BOVIN	QQTEDELQDK	617.2833++	2	617.283	QQTEDELQDK	5.7	5.63	5.8	47695084	0.6	0.9956	TRUE	5.69	5.62	5.81	44095880	0	0.9973	TRUE	5.72	5.63	5.81	19537212	0.5	0.9939	TRUE
sp|P02666|CASB_BOVIN	QQTEDE	749.2948+	1	749.295	QQTEDE	1.23	1.16	1.3	4571129	-1.4	0.9558	TRUE	1.23	1.18	1.31	4167956	-2	0.9708	ALIGNED
sp|P02666|CASB_BOVIN	QTEDELQDK	553.2540++	2	553.254	QTEDELQDK	5.31	5.24	5.4	56143264	-0.7	0.9879	TRUE	5.3	5.23	5.39	54970192	-0.1	0.9901	ALIGNED	5.31	5.23	5.41	26242110	0	0.9887	TRUE								5.36	5.29	5.46	2723152	-0.5	0.9708	ALIGNED
sp|P02666|CASB_BOVIN	QTEDELQD	489.2065++	2	489.207	QTEDELQD	6.55	6.49	6.62	1558228	0.5	0.9606	ALIGNED	6.53	6.44	6.62	2329432	0.7	0.8976	ALIGNED	6.56	6.43	6.62	3218564	1.1	0.9317	ALIGNED	6.56	6.5	6.66	915657	0.5	0.989	ALIGNED	6.57	6.49	6.67	9085236	-0.2	0.9978	TRUE	6.58	6.47	6.7	2421259	0	0.9882	ALIGNED
sp|P02666|CASB_BOVIN	TEDELQDK	977.4422+	1	977.442	TEDELQDK	4.9	4.85	5	218187456	-0.6	0.9969	TRUE	4.89	4.82	4.98	242595152	-0.8	0.994	TRUE	4.93	4.86	5.02	105682400	-0.5	0.9888	TRUE								5.02	4.88	5.1	505780	-1.7	0.9503	ALIGNED	5.02	4.93	5.12	522498	-0.8	0.9142	TRUE
sp|P02666|CASB_BOVIN	TEDELQDK	489.2247++	2	489.225	TEDELQDK	4.92	4.85	5	884946112	-0.4	0.9941	TRUE	4.89	4.82	4.98	912819584	-0.5	0.9975	TRUE	4.93	4.86	5.02	414388448	-0.4	0.9952	TRUE								5	4.88	5.1	2769735	-1.3	0.9959	ALIGNED	5.02	4.93	5.12	3769611	-1.5	0.9869	TRUE
sp|P02666|CASB_BOVIN	TEDELQDKIHPF	491.2403+++	3	491.24	TEDELQDKIHPF	12.94	12.79	13.09	227417648	-1.2	0.9519	TRUE	12.92	12.84	13.08	174341904	-1.7	0.9332	TRUE								12.88	12.7	13.02	612255	3.1	0.9577	ALIGNED	12.9	12.69	13.08	1648175	3.6	0.9822	ALIGNED	12.85	12.73	13.06	5720845	2.8	0.9874	ALIGNED
sp|P02666|CASB_BOVIN	TEDELQDKIHP	442.2175+++	3	442.217	TEDELQDKIHP	9.61	9.38	9.75	48210784	-0.3	0.987	TRUE	9.59	9.24	9.69	42132452	-0.9	0.9821	ALIGNED	9.58	9.22	9.7	67316648	-0.6	0.9876	TRUE	9.63	9.47	9.74	1184941	0.6	0.9861	ALIGNED	9.62	9.27	9.76	2898705	0.1	0.9923	ALIGNED	9.61	9.41	9.74	802580	-2.4	0.8747	ALIGNED
sp|P02666|CASB_BOVIN	TEDELQD	849.3472+	1	849.347	TEDELQD	6.3	6.24	6.41	25347930	0.3	0.9885	TRUE	6.31	6.23	6.39	31457916	-0.4	0.9893	TRUE	6.31	6.24	6.41	39320968	-0.2	0.9904	TRUE	6.32	6.24	6.44	1420972	0.7	0.9888	ALIGNED	6.34	6.26	6.44	14609178	-0.1	0.995	TRUE	6.34	6.26	6.46	3859913	0.5	0.9884	ALIGNED
sp|P02666|CASB_BOVIN	TEDELQD	425.1773++	2	425.177	TEDELQD	6.3	6.24	6.41	19710660	0.3	0.9697	TRUE	6.31	6.23	6.39	22456198	-0.5	0.9833	TRUE	6.31	6.24	6.41	25937952	0	0.9861	TRUE	6.32	6.24	6.44	2156912	0.1	0.9861	ALIGNED	6.34	6.26	6.44	18420282	-0.4	0.9935	TRUE	6.34	6.26	6.46	5641700	0	0.9881	ALIGNED
sp|P02666|CASB_BOVIN	TEDELQ	734.3203+	1	734.32	TEDELQ	5.63	5.51	5.74	19073306	0.2	0.9828	ALIGNED	5.6	5.51	5.74	17002346	-0.6	0.9896	TRUE	5.63	5.55	5.73	12482090	0	0.9834	ALIGNED	5.63	5.56	5.74	5681827	0.6	0.9945	ALIGNED	5.67	5.59	5.77	27032968	-0.2	0.9877	TRUE	5.67	5.6	5.79	11159435	0	0.9873	ALIGNED
sp|P02666|CASB_BOVIN	TEDEL	606.2617+	1	606.262	TEDEL	7.06	6.99	7.2	839551552	-0.2	0.991	TRUE	7.06	6.97	7.18	899531840	-0.5	0.9927	TRUE	7.09	6.99	7.2	590697600	-0.3	0.9915	TRUE	7.1	7.02	7.27	4163954	0.5	0.9866	ALIGNED	7.15	7.06	7.28	34745252	-0.5	0.9907	TRUE	7.15	7.06	7.26	9721150	-0.6	0.985	ALIGNED
sp|P02666|CASB_BOVIN	EDELQDKIHPF	457.5577+++	3	457.558	EDELQDKIHPF	12.9	12.74	13.02	1465717	-0.9	0.9754	ALIGNED	12.9	12.73	12.99	2279531	-0.9	0.8884	ALIGNED	12.87	12.77	12.94	3991052	-0.8	0.9614	ALIGNED	12.89	12.75	13.07	828889	2.2	0.9705	ALIGNED	12.86	12.76	13.03	1832937	3.6	0.976	ALIGNED	12.82	12.72	12.95	15956250	2.1	0.9971	TRUE
sp|P02666|CASB_BOVIN	EDELQDK	438.7009++	2	438.701	EDELQDK	4.27	4.2	4.35	19321030	-0.1	0.9807	ALIGNED	4.24	4.17	4.33	22552280	-0.3	0.98	TRUE	4.27	4.2	4.38	66984308	-0.4	0.9861	TRUE	4.33	4.21	4.5	822075	0	0.9956	ALIGNED	4.38	4.31	4.5	2847958	-1	0.9828	ALIGNED	4.39	4.32	4.51	7192280	-0.7	0.9934	TRUE
sp|P02666|CASB_BOVIN	DELQDKIHP	365.5207+++	3	365.521	DELQDKIHP															9.17	9.03	9.25	3515964	0	0.96	ALIGNED	9.24	8.97	9.39	4574646	1.6	0.9836	ALIGNED	9.22	8.81	9.4	8276745	1.4	0.9883	TRUE	9.21	9.02	9.41	5075970	0.4	0.9854	TRUE
sp|P02666|CASB_BOVIN	DELQDKIHPF	621.3117++	2	621.312	DELQDKIHPF															12.79	12.69	12.89	1641564	-0.2	0.9817	ALIGNED	12.79	12.72	12.93	765391	2.2	0.9876	ALIGNED	12.77	12.68	12.95	1598753	3.2	0.9909	ALIGNED	12.73	12.63	12.92	16190808	0.7	0.9927	TRUE
sp|P02666|CASB_BOVIN	DELQDK	747.3519+	1	747.352	DELQDK	3.57	3.51	3.67	35420904	-0.3	0.991	TRUE	3.56	3.51	3.65	39757900	-0.7	0.9922	TRUE	3.57	3.47	3.65	54608208	-0.4	0.9888	TRUE								3.66	3.6	3.75	689181	-2	0.961	ALIGNED
sp|P02666|CASB_BOVIN	DELQDK	374.1796++	2	374.18	DELQDK	3.57	3.51	3.67	86164848	-0.5	0.981	TRUE	3.56	3.51	3.65	89663280	-0.9	0.9757	TRUE	3.58	3.47	3.65	134765376	-0.5	0.9876	TRUE								3.66	3.6	3.75	2161429	-2.1	0.9877	ALIGNED
sp|P02666|CASB_BOVIN	DELQD	619.2570+	1	619.257	DELQD								4.85	4.78	5.04	28286918	-0.5	0.9771	ALIGNED	4.86	4.79	5.01	47035608	0.1	0.9851	ALIGNED	5.05	5.05	5.25	113671	0.7	0.9252	ALIGNED	4.93	4.85	5.07	103719728	-1.4	0.9823	TRUE
sp|P02666|CASB_BOVIN	ELQD	505.2140+	1	505.214	ELQ[+1]D																						4.05	3.96	4.15	5987957	0.3	0.9893	ALIGNED	4.12	4.04	4.22	42705452	-0.7	0.9886	TRUE	4.11	4.04	4.26	6256470	-1.9	0.9795	ALIGNED
sp|P02666|CASB_BOVIN	LQD	376.1714+	1	376.171	LQ[+1]D	3.06	2.82	3.07	9795235	-0.2	0.9902	ALIGNED	2.91	2.8	3	8220510	-0.4	0.9837	ALIGNED	3.06	2.79	3.07	7708913	-0.9	0.9652	ALIGNED								3.02	2.97	3.12	850166	0	0.941	TRUE	3.03	2.82	3.11	692233	-0.5	0.9669	ALIGNED
sp|P02666|CASB_BOVIN	LQDKIHPF	499.2769++	2	499.277	LQDKIHPF																						10.42	10.31	10.65	4890287	-2.1	0.9501	ALIGNED	10.48	10.33	10.72	5138166	-0.4	0.9772	ALIGNED	10.46	10.38	10.67	20324886	-0.8	0.9856	TRUE
sp|P02666|CASB_BOVIN	QDKIHP	246.4695+++	3	246.47	QDKIHP	3.85	3.58	3.94	25246258	-0.1	0.9633	ALIGNED	3.83	3.43	3.97	22640750	-0.5	0.9856	ALIGNED	3.87	3.4	3.97	77068424	-0.5	0.9863	TRUE	3.92	3.33	4.01	1461944	-0.4	0.9738	ALIGNED	3.99	3.55	4.13	2233665	-0.8	0.9376	ALIGNED
sp|P02666|CASB_BOVIN	DKIHP	305.1714++	2	305.171	DKIHP	3.31	3.02	3.41	121187888	-0.7	0.9826	TRUE	3.31	3.25	3.44	80171272	-1.1	0.9881	TRUE	3.36	3.02	3.47	168423600	-0.6	0.9868	TRUE	3.45	2.91	3.6	44683952	-0.7	0.9857	ALIGNED	3.53	3.11	3.7	111021456	-1.8	0.9862	TRUE	3.53	3.08	3.76	21105430	-2.1	0.9774	TRUE
sp|P02666|CASB_BOVIN	DKIHPFAQ	478.2534++	2	478.253	DKIHPFAQ																						8.12	8.07	8.2	71296	-0.2	0.9118	ALIGNED	8.13	8.07	8.2	360710	-0.1	0.9396	ALIGNED	8.13	8.03	8.33	3975350	-0.4	0.9958	TRUE
sp|P02666|CASB_BOVIN	DKIHPF	378.7056++	2	378.706	DKIHPF	8.56	8.46	8.73	687719552	0.3	0.992	ALIGNED	8.56	8.46	8.71	754681024	-0.3	0.9885	TRUE	8.55	8.33	8.56	11625890	0.4	0.9733	ALIGNED	8.69	8.58	8.84	139165248	-1.1	0.994	ALIGNED	8.63	8.42	8.64	978636	-4.4	0.9585	ALIGNED	8.72	8.41	8.98	458652096	-1.4	0.9942	ALIGNED
sp|P02666|CASB_BOVIN	KIHP	494.3085+	1	494.309	KIHP	2.02	1.92	2.12	48912800	-0.9	0.9799	TRUE	2.01	1.91	2.09	34677980	-0.9	0.9797	ALIGNED								2.1	1.7	2.22	3552638	0.9	0.9823	ALIGNED	2.24	1.78	2.43	22378330	-0.1	0.9808	ALIGNED	2.25	1.84	2.5	2266292	0.5	0.9772	ALIGNED
sp|P02666|CASB_BOVIN	KIHP	247.6579++	2	247.658	KIHP																						2.1	1.7	2.22	28446732	1.1	0.9815	ALIGNED	2.24	1.78	2.43	54379524	0.1	0.9846	ALIGNED	2.25	1.84	2.5	30527548	0.3	0.9749	ALIGNED
sp|P02666|CASB_BOVIN	KIHPFA	356.7107++	2	356.711	KIHPFA	7.25	7.2	7.32	7372901	0	0.9309	ALIGNED	7.25	7.14	7.32	6164202	-0.5	0.8936	ALIGNED	7.24	7.2	7.33	7739239	-0.1	0.9589	ALIGNED	7.33	7.2	7.55	1964075	-1.1	0.9908	ALIGNED	7.4	7.31	7.53	4330752	-1.2	0.9913	ALIGNED	7.41	7.31	7.61	26316230	-2.2	0.9876	TRUE
sp|P02666|CASB_BOVIN	KIHPFAQTQ	535.2931++	2	535.293	KIHPFAQTQ																													7.12	7.06	7.27	300749	0.8	0.9351	ALIGNED	7.12	7.04	7.29	5010057	-0.5	0.9827	TRUE
sp|P02666|CASB_BOVIN	KIHPF	641.3770+	1	641.377	KIHPF	7.38	7.27	7.52	63367136	-0.7	0.9883	TRUE	7.37	7.25	7.54	52760276	-0.9	0.9802	TRUE								7.4	7.31	7.6	3756855	-0.1	0.988	TRUE	7.54	7.43	7.7	12124022	-0.4	0.9916	TRUE	7.56	7.42	7.76	25550802	-1.4	0.9853	TRUE
sp|P02666|CASB_BOVIN	KIHPF	321.1921++	2	321.192	KIHPF	7.36	7.27	7.52	279321344	-0.5	0.9793	TRUE	7.37	7.25	7.54	217893328	-1.1	0.9838	TRUE	7.35	7.25	7.51	11660739	-1.1	0.9348	ALIGNED	7.42	7.31	7.6	71539992	-0.3	0.9918	TRUE	7.52	7.43	7.7	110329112	-0.7	0.9929	TRUE	7.53	7.42	7.76	231312592	-1.4	0.9904	TRUE
sp|P02666|CASB_BOVIN	KIHPFAQTQSL	423.9032+++	3	423.903	KIHPFAQTQSL																																				10.59	10.5	10.92	4105481	0.6	0.9928	TRUE
sp|P02666|CASB_BOVIN	IHPFAQ	356.6925++	2	356.692	IHPFAQ																						8.52	8.05	8.68	15377	-1.2	0.8254	ALIGNED								8.52	8.42	8.69	3005007	-0.1	0.9696	TRUE
sp|P02666|CASB_BOVIN	IHPF	513.2820+	1	513.282	IHPF	9.15	9.04	9.45	6641662464	-0.4	0.9885	TRUE	9.12	9.02	9.43	7185769984	-0.8	0.9887	TRUE	9.22	9.13	9.48	3325474560	-0.1	0.9892	TRUE	9.33	9.22	9.45	1007537	1.2	0.9905	TRUE	9.4	9.29	9.61	5762727	1.8	0.9685	ALIGNED	9.38	9.29	9.63	13671262	0	0.9753	TRUE
sp|P02666|CASB_BOVIN	IHPF	257.1446++	2	257.145	IHPF	9.16	9.04	9.45	14228122624	-0.9	0.9891	TRUE	9.14	9.02	9.43	15407596544	-1.1	0.9892	TRUE	9.25	9.13	9.48	7019672576	-0.6	0.9878	TRUE	9.33	9.22	9.45	5426507	0.4	0.9801	TRUE	9.42	9.29	9.61	24555952	1.2	0.9837	ALIGNED	9.4	9.29	9.63	61839696	-0.7	0.9834	TRUE
sp|P02666|CASB_BOVIN	FAQTQSL	794.4043+	1	794.404	FAQTQSL																						9.6	9.51	9.77	45828	-0.9	0.8243	ALIGNED	9.61	9.5	9.68	278010	4.4	0.9903	ALIGNED	9.6	9.5	9.7	12383059	-2.1	0.9856	TRUE
sp|P02666|CASB_BOVIN	FAQTQSL	397.7058++	2	397.706	FAQTQSL																						9.6	9.51	9.77	133881	0.1	0.9008	ALIGNED	9.61	9.5	9.68	519798	-0.2	0.9086	ALIGNED	9.6	9.5	9.7	16017516	-2.8	0.9856	TRUE
sp|P02666|CASB_BOVIN	FAQTQ	595.2722+	1	595.272	FAQ[+1]TQ																						4.72	4.61	4.8	888618	0.7	0.9543	ALIGNED	4.76	4.64	4.89	6960015	-0.7	0.98	TRUE	4.75	4.66	4.87	18560392	-1.8	0.9866	TRUE
sp|P02666|CASB_BOVIN	AQTQ	447.2198+	1	447.22	AQTQ																						0.65	0.54	0.76	2205029	-0.7	0.9645	ALIGNED	0.74	0.6	0.8	18528940	-1.9	0.9799	ALIGNED	0.63	0.55	0.71	1642751	-0.6	0.9734	TRUE
sp|P02666|CASB_BOVIN	QSLVYPFPGPIPN	714.8797++	2	714.88	QSLVYPFPGPIPN	18.33	18.15	18.47	25076180	-1.3	0.9845	TRUE	18.3	18.19	18.44	18136202	-1.5	0.9771	TRUE	18.23	18.14	18.31	1952827	0.4	0.9847	ALIGNED								18.11	17.95	18.2	89540	2.6	0.9679	ALIGNED	18.25	18.14	18.36	335945	-0.5	0.9061	ALIGNED
sp|P02666|CASB_BOVIN	QSLVYPFPGPIP	657.8583++	2	657.858	QSLVYPFPGPIP	19.9	19.81	20.06	9928391	2.2	0.9842	ALIGNED	19.89	19.76	20.04	11562559	2.3	0.9971	TRUE	19.78	19.64	19.97	3844707	3.9	0.9979	ALIGNED
sp|P02666|CASB_BOVIN	QSLVYPFPGPI	609.3319++	2	609.332	QSLVYPFPGPI	19.78	19.58	19.93	26209296	4.2	0.9894	TRUE	19.76	19.53	19.9	19384604	3.7	0.987	TRUE
sp|P02666|CASB_BOVIN	SLVYPFPGPIPN	1300.6936+	1	1300.69	SLVYPFPGPIPN	18.55	18.42	18.69	339355584	0.4	0.9984	TRUE	18.54	18.4	18.68	433037696	-0.3	0.9958	TRUE	18.44	18.31	18.59	112132080	0.6	0.9934	TRUE	18.36	18.25	18.58	105252	2.7	0.9839	ALIGNED	18.29	18.18	18.47	872213	1.4	0.951	ALIGNED	18.23	18.13	18.39	500915	2	0.9332	TRUE
sp|P02666|CASB_BOVIN	SLVYPFPGPIPN	650.8504++	2	650.85	SLVYPFPGPIPN	18.55	18.42	18.69	1178608896	-0.2	0.9958	TRUE	18.53	18.4	18.68	1359063296	-0.9	0.9975	TRUE	18.44	18.31	18.59	455132352	-0.2	0.9935	TRUE	18.38	18.25	18.58	2580144	1.5	0.9849	ALIGNED	18.29	18.18	18.47	10331994	0.8	0.9971	ALIGNED	18.24	18.13	18.39	7238626	1.1	0.9967	TRUE
sp|P02666|CASB_BOVIN	SLVYPFPGPI	1089.5979+	1	1089.6	SLVYPFPGPI	20.07	19.96	20.25	798040960	0.1	0.9952	TRUE	20.06	19.94	20.21	985445248	-0.3	0.9964	TRUE	19.95	19.84	20.11	274323264	1.6	0.9938	TRUE
sp|P02666|CASB_BOVIN	SLVYPFPGPI	545.3026++	2	545.303	SLVYPFPGPI	20.07	19.96	20.25	1229127040	0.3	0.9952	TRUE	20.06	19.94	20.21	1469152000	0	0.9955	TRUE	19.95	19.84	20.11	550073216	1.7	0.9947	TRUE	19.95	19.66	20.13	213848	-1.8	0.8824	ALIGNED	19.85	19.54	20.01	62814	-0.1	0.8769	ALIGNED	19.78	19.58	19.98	87920	-0.1	0.9169	ALIGNED
sp|P02666|CASB_BOVIN	LVY	394.2336+	1	394.234	LVY	8.14	8.07	8.25	199109680	-1.5	0.9825	TRUE	8.14	8.06	8.25	196835568	-1.4	0.9842	TRUE	8.15	8.08	8.25	18740086	-0.7	0.9361	ALIGNED
sp|P02666|CASB_BOVIN	LVYPFPGPIPN	1213.6616+	1	1213.66	LVYPFPGPIPN	18.07	17.94	18.24	663914048	-1.1	0.9946	TRUE	18.02	17.94	18.23	763093888	-1.3	0.9974	TRUE	17.96	17.83	18.14	261150560	-1	0.9927	TRUE	17.94	17.76	18.1	1006027	2	0.9858	ALIGNED	17.87	17.74	18.03	3513311	2.1	0.9943	TRUE	17.8	17.69	17.96	4592097	-0.1	0.9907	ALIGNED
sp|P02666|CASB_BOVIN	LVYPFPGPIPN	607.3344++	2	607.334	LVYPFPGPIPN	18.07	17.94	18.24	1558537344	-1.5	0.9945	TRUE	18.05	17.94	18.23	1759706496	-1.6	0.9981	TRUE	17.96	17.83	18.14	787158656	-1.4	0.9947	TRUE	17.94	17.76	18.1	10816892	0.7	0.9918	ALIGNED	17.87	17.74	18.03	26003268	1.6	0.9968	TRUE	17.8	17.69	17.96	27743904	-0.4	0.9934	ALIGNED
sp|P02666|CASB_BOVIN	LVYPF	638.3548+	1	638.355	LVYPF	17.03	16.89	17.23	8808527	0.1	0.9752	ALIGNED	17.02	16.7	17.18	18676404	0.4	0.9094	TRUE	16.91	16.78	17.1	2810649	1.3	0.8981	ALIGNED	16.93	16.8	17.02	192864	1.8	0.9318	ALIGNED	16.9	16.76	17.14	452984	3.8	0.9693	ALIGNED	16.86	16.66	17.04	1305348	4.1	0.9534	ALIGNED
sp|P02666|CASB_BOVIN	LVYPFPGPI	1002.5659+	1	1002.57	LVYPFPGPI	19.64	19.5	19.8	1397921792	-0.3	0.9945	TRUE	19.61	19.49	19.78	1613773312	-0.5	0.9961	TRUE	19.51	19.39	19.68	691548928	0.5	0.9943	TRUE
sp|P02666|CASB_BOVIN	LVYPFPGPI	501.7866++	2	501.787	LVYPFPGPI	19.64	19.5	19.8	2320284416	0	0.9965	TRUE	19.61	19.49	19.78	2556540928	-0.2	0.9961	TRUE	19.51	19.39	19.68	1194049280	0.7	0.9956	TRUE								19.44	19.24	19.51	99459	2.1	0.885	ALIGNED	19.35	19.26	19.48	193293	3.8	0.9571	ALIGNED
sp|P02666|CASB_BOVIN	LVYPFPGPIP	550.3130++	2	550.313	LVYPFPGPIP	19.82	19.66	19.99	1614485	3.2	0.9793	ALIGNED	19.79	19.66	20	2609985	2.3	0.9735	ALIGNED	19.7	19.54	20.04	23120042	3.8	0.9917	TRUE	19.6	19.51	19.75	159228	-1.5	0.8961	ALIGNED	19.58	19.2	20.05	761868	1.7	0.9522	ALIGNED	19.53	19.34	20.03	7743525	4.3	0.9921	ALIGNED
sp|P02666|CASB_BOVIN	VYPFPGPIP	986.5346+	1	986.535	VYPFPGPIP															18.32	18.02	18.65	242270992	0	0.9777	TRUE								18.15	18.04	18.45	218394	0.3	0.8583	ALIGNED	18.18	17.89	18.67	8806050	1.8	0.9895	ALIGNED
sp|P02666|CASB_BOVIN	VYPF	525.2708+	1	525.271	VYPF	13.73	13.6	13.9	31171762	2.3	0.9094	ALIGNED	13.77	13.5	13.86	62840884	1.2	0.9735	TRUE																						13.65	13.19	13.71	2300321	-1.8	0.9441	ALIGNED
sp|P02666|CASB_BOVIN	VYPFPGPIPNS	1187.6095+	1	1187.61	VYPFPGPIPNS	16.06	15.87	16.33	49294528	2.1	0.9964	TRUE	16.02	15.85	16.28	38640452	1.5	0.9949	ALIGNED	15.95	15.77	16.21	27045622	1.9	0.9942	ALIGNED
sp|P02666|CASB_BOVIN	VYPFPGPIPNS	594.3084++	2	594.308	VYPFPGPIPNS	16.06	15.87	16.33	135669360	1.1	0.9979	TRUE	16.02	15.85	16.28	107302800	0.6	0.998	ALIGNED	16	15.77	16.21	86815816	1.3	0.9931	ALIGNED								15.91	15.72	16.06	272761	3.6	0.8818	ALIGNED	15.86	15.72	16.03	740161	1.9	0.9277	ALIGNED
sp|P02666|CASB_BOVIN	VYPFPGPI	889.4818+	1	889.482	VYPFPGPI	18.04	17.77	18.36	17248305152	-1.3	0.9945	TRUE	18.02	17.75	18.34	17875863552	-1.4	0.9951	TRUE	17.96	17.69	18.27	8243624960	-1	0.9949	TRUE
sp|P02666|CASB_BOVIN	VYPFPGPI	445.2445++	2	445.245	VYPFPGPI	18.02	17.77	18.36	9830704128	-1	0.9942	TRUE	18.02	17.75	18.34	9576357888	-1.2	0.9963	TRUE	17.94	17.69	18.27	5329720320	-0.8	0.9944	TRUE
sp|P02666|CASB_BOVIN	VYPFPGPIPN	1100.5775+	1	1100.58	VYPFPGPIPN	16.48	16.25	16.81	10259974144	-0.9	0.9957	TRUE	16.43	16.24	16.8	9923540992	-1	0.9959	TRUE	16.46	16.19	16.73	4305235968	0	0.9949	TRUE	16.41	15.92	16.72	952762	2.3	0.9863	TRUE	16.32	16.11	16.69	3597283	2.1	0.9768	ALIGNED	16.29	16.05	16.6	10317966	1.8	0.9924	TRUE
sp|P02666|CASB_BOVIN	VYPFPGPIPN	550.7924++	2	550.792	VYPFPGPIPN	16.49	16.25	16.81	13596049408	-0.3	0.9947	TRUE	16.49	16.24	16.8	13330502656	-0.4	0.9964	TRUE	16.44	16.19	16.73	6537946112	0.7	0.9946	TRUE	16.41	15.92	16.72	6771396	1.5	0.9891	TRUE	16.34	16.11	16.69	16602750	1.6	0.9907	ALIGNED	16.29	16.05	16.6	44905656	1.2	0.9955	TRUE
sp|P02666|CASB_BOVIN	YPFPGPI	790.4134+	1	790.413	YPFPGPI	16.89	16.62	17.18	1030777216	-0.2	0.9955	TRUE	16.89	16.63	17.29	925348800	-0.6	0.9912	TRUE	16.81	16.56	17.22	391154784	-1.6	0.9537	TRUE	16.79	16.57	17.19	1595621	4.7	0.9912	ALIGNED								16.74	16.47	16.89	719062	0.2	0.8563	ALIGNED
sp|P02666|CASB_BOVIN	YPFPGPI	395.7103++	2	395.71	YPFPGPI	16.88	16.62	17.18	185182736	0.5	0.9926	TRUE	16.86	16.63	17.29	161058416	0.2	0.991	TRUE	16.81	16.56	17.22	68537712	0.3	0.9855	TRUE															16.74	16.47	16.89	496890	3.8	0.8747	ALIGNED
sp|P02666|CASB_BOVIN	YPFPGPIPN	1001.5091+	1	1001.51	YPFPGPIPN	15.51	15.36	15.75	482000864	-0.2	0.9949	TRUE	15.55	15.35	15.75	430052576	-0.7	0.9951	TRUE	15.45	15.29	15.67	154048624	-0.4	0.9941	TRUE	15.41	15.25	15.68	25929362	2.5	0.9917	TRUE	15.37	15.19	15.64	50397584	3.1	0.9909	TRUE	15.34	15.16	15.6	16929620	4.2	0.9911	TRUE
sp|P02666|CASB_BOVIN	YPFPGPIPN	501.2582++	2	501.258	YPFPGPIPN	15.51	15.36	15.75	541467136	-0.3	0.9936	TRUE	15.5	15.35	15.75	484693248	-0.9	0.9922	TRUE	15.45	15.29	15.67	183339952	-0.2	0.996	TRUE	15.41	15.25	15.68	99151280	2.3	0.995	TRUE	15.37	15.19	15.64	141194496	2.5	0.9958	TRUE	15.32	15.16	15.6	55952576	3.3	0.9961	TRUE
sp|P02666|CASB_BOVIN	YPFP	523.2551+	1	523.255	YPFP	14.82	14.72	14.93	113589080	-0.2	0.9866	TRUE	14.78	14.7	14.91	107978624	-0.6	0.9897	TRUE	14.74	14.66	14.89	64587080	0.6	0.9854	TRUE	13.32	13.07	13.83	19490032	2	0.9907	TRUE	13.37	13.17	13.79	34611448	3.2	0.9928	ALIGNED	13.3	13.15	13.7	9777525	3.4	0.918	ALIGNED
sp|P02666|CASB_BOVIN	YPFPGPIP	444.2367++	2	444.237	YPFPGPIP	18.47	18.33	18.65	107573608	1	0.9034	TRUE	18.44	18.3	18.64	229649392	-0.2	0.9426	ALIGNED	18.37	18.21	18.56	163851648	1.1	0.8962	ALIGNED	18.34	18.19	18.54	3058931	0.1	0.9753	ALIGNED	18.28	18.14	18.46	4599930	0.1	0.9906	ALIGNED	18.23	18.08	18.41	5240939	0.4	0.9833	ALIGNED
sp|P02666|CASB_BOVIN	PFP	360.1918+	1	360.192	PFP	8.96	8.8	9.1	33260826	-0.5	0.9659	TRUE															8.98	8.32	9.53	4612090	0.9	0.9482	TRUE	10.15	9.97	10.68	7909449	0.1	0.9901	TRUE	9.07	7.99	9.5	12148522	-0.3	0.9343	TRUE
sp|P02666|CASB_BOVIN	PFPGPI	627.3501+	1	627.35	PFPGPI	18.03	17.77	18.35	1281006848	-1.5	0.9888	TRUE	18.01	17.74	18.37	1266216448	-1.8	0.9893	TRUE	14.46	14.46	14.8	147020192	-0.7	0.9861	TRUE	14.37	14.28	14.42	135704	2.5	0.9299	ALIGNED	14.62	14.49	14.82	3106550	0.1	0.8172	ALIGNED
sp|P02666|CASB_BOVIN	PFPGPI	314.1787++	2	314.179	PFPGPI	18.03	17.77	18.35	15375572	-1.8	0.9555	TRUE	17.96	17.74	18.37	15135131	-2.1	0.9681	TRUE
sp|P02666|CASB_BOVIN	PFPGPIPN	838.4458+	1	838.446	PFPGPIPN	13.43	13.22	13.68	368838400	0.9	0.9933	TRUE	13.41	13.23	13.67	395886720	0.6	0.9928	TRUE	13.36	13.19	13.64	271864704	1	0.9886	TRUE								13.36	13.22	13.56	229746	-0.1	0.8047	ALIGNED
sp|P02666|CASB_BOVIN	PFPGPIPN	419.7265++	2	419.727	PFPGPIPN	13.42	13.22	13.68	267191264	0.2	0.9935	TRUE	13.41	13.23	13.67	297108096	0	0.9925	TRUE	13.36	13.19	13.64	222948080	0.8	0.9924	TRUE	13.19	13.19	13.59	522080	2.1	0.8185	ALIGNED	13.36	13.22	13.56	928573	2.4	0.9849	ALIGNED	13.31	13.22	13.49	892595	3.2	0.9686	ALIGNED
sp|P02666|CASB_BOVIN	FPGPIPN	741.3930+	1	741.393	FPGPIPN	13	12.39	13.19	83073440	-0.2	0.9874	TRUE	13.05	12.29	13.14	68951888	-1	0.9772	ALIGNED	12.89	12.36	13.09	27101320	-0.6	0.9784	ALIGNED	12.71	12.33	13.64	19065044	2.2	0.9911	ALIGNED	12.64	12.35	13.65	61348376	2.9	0.9881	TRUE	12.56	12.31	13.54	24722412	1.8	0.9797	ALIGNED
sp|P02666|CASB_BOVIN	FPGPIPN	371.2001++	2	371.2	FPGPIPN	12.8	12.39	13.19	11152475	1.2	0.9676	TRUE	12.8	12.29	13.14	9452912	0.3	0.9747	ALIGNED	12.75	12.36	13.09	3317130	0.5	0.9655	ALIGNED	12.46	12.33	13.64	7559291	2	0.9932	ALIGNED	12.47	12.35	13.65	17532304	2.1	0.9923	TRUE	12.65	12.31	13.54	6218692	1.3	0.9857	ALIGNED
sp|P02666|CASB_BOVIN	FPGPI	530.2973+	1	530.297	FPGPI	13.7	13.32	13.77	16438287	1.7	0.946	TRUE	17.96	17.7	18.46	60550704	-0.8	0.9728	TRUE	17.97	17.69	18.37	38125364	-2.5	0.8857	TRUE
sp|P02666|CASB_BOVIN	PGPIPN	594.3246+	1	594.325	PGPIPN	16.48	16.27	16.75	231276160	-0.8	0.9862	TRUE	16.49	16.27	16.74	224599696	-0.9	0.9915	TRUE	16.41	16.19	16.69	110316608	0.3	0.9902	TRUE	8.24	8.02	8.4	3520344	1	0.9873	TRUE	8.27	8.1	8.41	10241716	0.7	0.9849	TRUE
sp|P02666|CASB_BOVIN	PGPI	383.2289+	1	383.229	PGPI	19.64	19.48	19.8	56079204	-0.7	0.9759	TRUE	18.01	17.76	18.37	512944768	-1.5	0.9795	TRUE	17.93	17.7	18.33	279641568	-1.1	0.9796	TRUE	17.53	17.33	17.92	1389442	-2	0.9038	ALIGNED	17.43	17.32	17.69	282185	2	0.9069	ALIGNED	17.48	17.23	17.7	303044	-0.9	0.9101	ALIGNED
sp|P02666|CASB_BOVIN	GPIPN	497.2718+	1	497.272	GPIPN	6.77	6.56	7.04	180510704	0.1	0.9786	TRUE	6.79	6.55	7.04	200112608	-0.3	0.9844	TRUE	6.81	6.57	7.05	46321776	-0.2	0.9625	ALIGNED	6.8	6.62	7.06	70164096	0.7	0.9864	TRUE	6.84	6.63	7.09	273180608	0.2	0.9894	TRUE	6.85	6.71	6.86	21874190	0.2	0.991	TRUE
sp|P02666|CASB_BOVIN	GPIPN	249.1395++	2	249.14	GPIPN																						6.8	6.62	7.06	4321384	0.7	0.9495	TRUE	6.84	6.63	7.09	14079342	0.1	0.9354	TRUE
sp|P02666|CASB_BOVIN	PIPNSLPQ	433.2425++	2	433.243	PIPNSLPQ	11.04	10.87	11.15	151791776	0.9	0.9654	ALIGNED	11.03	10.73	11.23	172726992	0.5	0.9587	TRUE	11.04	10.76	11.2	150126512	1.1	0.9547	ALIGNED
sp|P02666|CASB_BOVIN	NSLPQ	558.2882+	1	558.288	NSLPQ	5.49	5.39	5.58	53771612	0.8	0.9901	TRUE	5.48	5.41	5.57	51070008	-0.6	0.9842	ALIGNED	5.5	5.43	5.64	27175624	0.6	0.9843	ALIGNED	5.49	5.42	5.63	784835	1.1	0.957	ALIGNED	5.55	5.46	5.67	7866591	-0.8	0.9256	ALIGNED	5.55	5.42	5.67	1643322	-0.6	0.9165	ALIGNED
sp|P02666|CASB_BOVIN	SLPQNIPPLTQTP	703.3879++	2	703.388	SLPQNIPPLTQTP	14.72	14.53	15.03	43889580	-0.7	0.9916	TRUE	14.7	14.33	14.99	39754232	-0.9	0.9665	ALIGNED	14.67	14.49	14.85	41892040	-0.6	0.9895	ALIGNED
sp|P02666|CASB_BOVIN	SLPQNIPPL	978.5619+	1	978.562	SLPQNIPPL	15.55	15.36	16.26	157625744	1.1	0.9898	TRUE	15.55	15.35	16.3	149081280	0.6	0.9923	TRUE	15.52	15.27	16.2	230838464	1.2	0.9929	TRUE								15.55	15.28	16.13	1731411	2.3	0.8096	ALIGNED	15.48	15.07	16.12	4586446	2.4	0.8987	ALIGNED
sp|P02666|CASB_BOVIN	SLPQNIPPL	489.7846++	2	489.785	SLPQNIPPL	15.65	15.36	16.26	276854688	0.7	0.9924	TRUE	15.65	15.35	16.3	271609632	0.2	0.9907	TRUE	15.52	15.27	16.2	468976096	1.2	0.9929	TRUE	15.59	15.28	15.9	479930	1.1	0.9295	ALIGNED	15.46	15.28	16.13	4498014	1.8	0.9879	ALIGNED	15.43	15.07	16.12	22602998	2.1	0.9948	ALIGNED
sp|P02666|CASB_BOVIN	SLPQ	444.2453+	1	444.245	SLPQ	5	4.91	5.18	3761416960	-0.6	0.982	TRUE	4.99	4.89	5.17	3962720768	-1.2	0.9828	TRUE	5.01	4.93	5.2	3825461760	-0.9	0.9851	TRUE	5.07	4.96	5.25	5464051	1.2	0.974	ALIGNED	5.12	5.02	5.28	58694880	0.1	0.984	TRUE	5.13	5.01	5.26	24860352	-0.7	0.9807	ALIGNED
sp|P02666|CASB_BOVIN	SLPQNIPPLT	1079.6095+	1	1079.61	SLPQNIPPLT															14.43	14.03	15.13	390132992	-0.2	0.9938	TRUE
sp|P02666|CASB_BOVIN	SLPQNIPPLT	540.3084++	2	540.308	SLPQNIPPLT	14.62	14.59	15.04	147625136	0.2	0.9761	TRUE	14.41	14.4	14.99	284144672	0	0.9788	TRUE	14.37	14.03	15.13	539512320	0.2	0.9799	TRUE
sp|P02666|CASB_BOVIN	SLPQNIPPLTQT	1308.7158+	1	1308.72	SLPQNIPPLTQT	13.98	13.73	14.54	2437275392	-0.3	0.9945	TRUE	13.94	13.72	14.51	2370492160	-0.8	0.9959	TRUE	13.91	13.67	14.44	1875696000	0	0.9948	TRUE
sp|P02666|CASB_BOVIN	SLPQNIPPLTQT	654.8615++	2	654.862	SLPQNIPPLTQT	13.97	13.73	14.54	10127855616	-0.4	0.9954	TRUE	13.94	13.72	14.51	9455909888	-1	0.9967	TRUE	13.96	13.67	14.44	8679407616	-0.1	0.9965	TRUE
sp|P02666|CASB_BOVIN	SLPQNIPPLTQT	436.9101+++	3	436.91	SLPQNIPPLTQT	13.96	13.73	14.54	329090848	-0.3	0.9925	TRUE	13.96	13.72	14.51	315252192	-0.8	0.9983	TRUE	13.96	13.67	14.44	295328800	-0.3	0.9927	TRUE
sp|P02666|CASB_BOVIN	SLPQNIPPLTQTPV	752.9221++	2	752.922	SLPQNIPPLTQTPV	15.84	15.61	16.24	1186723328	0.7	0.9949	TRUE	15.86	15.6	16.21	1237690112	0.1	0.9982	TRUE	15.74	15.53	16.15	1662000896	1.2	0.9959	TRUE								15.71	15.55	15.91	144802	2.1	0.8584	ALIGNED	15.63	15.42	15.9	1676201	1.4	0.9803	ALIGNED
sp|P02666|CASB_BOVIN	SLPQNIPPLTQTPV	502.2838+++	3	502.284	SLPQNIPPLTQTPV	15.88	15.61	16.24	151639296	0	0.9843	TRUE	15.86	15.6	16.21	159291136	-0.4	0.9854	TRUE	15.74	15.53	16.15	222550720	0.6	0.9886	TRUE
sp|P02666|CASB_BOVIN	SLPQNIPPLTQTPVVVPPFLQPEV	1305.7307++	2	1305.73	SLPQNIPPLTQTPVVVPPFLQPEV	22.01	21.92	22.11	66226304	2.7	0.9984	ALIGNED	22	21.92	22.1	64196648	2.4	0.9985	TRUE
sp|P02666|CASB_BOVIN	SLPQNIPPLTQTPVVVPPFLQPEV	870.8229+++	3	870.823	SLPQNIPPLTQTPVVVPPFLQPEV	22.02	21.92	22.11	257224192	1.9	0.9982	ALIGNED	22	21.92	22.1	248431024	1.5	0.9974	TRUE
sp|P02666|CASB_BOVIN	SLPQNIPPLTQ	604.3377++	2	604.338	SLPQNIPPLTQ	13.78	13.48	14.38	181275696	0.1	0.9915	TRUE	13.77	13.39	14.38	160014336	-0.5	0.9888	TRUE	13.73	13.36	14.12	80140064	0.3	0.9896	TRUE								13.67	13.64	13.7	25110	-3.3	0.917	ALIGNED	13.46	13.31	13.92	961685	-0.5	0.9671	ALIGNED
sp|P02666|CASB_BOVIN	LPQNIPPLTQT	611.3455++	2	611.346	LPQNIPPLTQT															13.38	13.2	14.02	85799152	-2.1	0.9253	TRUE															13.35	13.18	13.61	578430	-0.4	0.876	ALIGNED
sp|P02666|CASB_BOVIN	LPQNIPPL	891.5298+	1	891.53	LPQNIPPL															14.91	14.76	15.25	39728392	-0.1	0.9421	TRUE	14.97	14.81	15.46	489584	2.3	0.9633	ALIGNED	14.9	14.76	14.91	534680	3.3	0.8941	TRUE	14.94	14.7	15.6	20416818	1.2	0.9875	TRUE
sp|P02666|CASB_BOVIN	LPQNIPPL	446.2686++	2	446.269	LPQNIPPL															14.91	14.76	15.25	12211378	-1.5	0.9039	TRUE	14.95	14.81	15.46	1226049	3.4	0.9335	ALIGNED								14.94	14.7	15.6	37473128	2.5	0.9902	TRUE
sp|P02666|CASB_BOVIN	PQNIPPLTQTPVVVPPFLQPEV	804.1175+++	3	804.118	PQNIPPLTQTPVVVPPFLQPEV	21.89	21.73	21.97	43218012	4	0.9933	TRUE	21.86	21.74	21.99	39921304	3.8	0.9974	TRUE	21.84	21.61	21.94	41515092	3.8	0.9947	TRUE
sp|P02666|CASB_BOVIN	PQNIPPLTQTPVVVPPFLQPE	1156.1385++	2	1156.14	PQNIPPLTQTPVVVPPFLQPE	21.23	21.04	21.38	26263268	-1.5	0.9916	TRUE	21.18	20.94	21.32	22602898	-1.4	0.9887	TRUE
sp|P02666|CASB_BOVIN	PQNIPPLTQTPVVVPPFLQPE	771.0947+++	3	771.095	PQNIPPLTQTPVVVPPFLQPE	21.22	21.04	21.38	47413576	-1.5	0.9821	TRUE	21.17	20.94	21.32	42612024	-2.1	0.9697	TRUE	21.08	20.77	21.18	18387344	-1.9	0.9706	TRUE
sp|P02666|CASB_BOVIN	PQNIPPLTQTPV	652.8641++	2	652.864	PQNIPPLTQTPV	13.78	13.26	13.8	105825808	0.1	0.9373	TRUE	13.77	13.23	13.78	105019784	-0.7	0.9484	TRUE
sp|P02666|CASB_BOVIN	PQNIPPLTQT	1108.5997+	1	1108.6	PQNIPPLTQT	11.27	11.04	11.92	421680096	-0.4	0.9929	TRUE	11.28	11.04	11.97	356146240	-0.8	0.9936	TRUE	11.19	11.02	11.89	143866912	-0.2	0.9819	TRUE
sp|P02666|CASB_BOVIN	PQNIPPLTQT	554.8035++	2	554.803	PQNIPPLTQT	11.27	11.04	11.92	574098432	0.5	0.9882	TRUE	11.26	11.04	11.97	490019072	0.2	0.9965	TRUE	11.28	11.02	11.89	227289968	0.6	0.9898	TRUE															11.34	11.25	11.44	132310	1.5	0.8886	ALIGNED
sp|P02666|CASB_BOVIN	PQNIPPLT	959.4598+	1	959.46	PQNIPPLT[+80]	13.98	13.9	14.08	5311142	-3.8	0.9212	ALIGNED	13.98	13.89	14.06	7657504	-2.9	0.9679	ALIGNED	13.9	13.81	14.02	52608652	-1	0.9761	TRUE
sp|P02666|CASB_BOVIN	PQNIPPLTQTPVVVPPFLQPEVM	847.7977+++	3	847.798	PQNIPPLTQTPVVVPPFLQPEVM	22.06	21.99	22.17	16287099	2.2	0.9915	TRUE	22.04	21.97	22.11	16205866	2	0.9893	ALIGNED
sp|P02666|CASB_BOVIN	NIPPLTQTPVVVPPFLQPEVM	778.0922+++	3	778.092	NIPPLTQTPVVVPPFLQPEVM[+16]	21.68	21.57	22.03	19176650	2.7	0.9457	TRUE	21.65	21.55	21.99	18578690	2.5	0.9075	ALIGNED	21.54	21.45	21.9	6155525	3.4	0.8894	ALIGNED
sp|P02666|CASB_BOVIN	NIPPLTQTPVVVPPF	809.9638++	2	809.964	NIPPLTQTPVVVPPF	20.66	20.27	21.26	115833032	0	0.9906	TRUE	20.63	20.36	21.19	127143456	-0.1	0.9927	TRUE	20.54	20.28	21.12	168703808	0.1	0.994	TRUE								20.28	20.23	20.55	138539	2.6	0.9272	ALIGNED	20.17	20.04	20.39	317428	3.8	0.9718	ALIGNED
sp|P02666|CASB_BOVIN	NIPPL	553.3344+	1	553.334	NIPPL	12.57	12.52	12.93	189009536	0.6	0.9596	TRUE	12.42	12.3	12.95	480078592	-0.4	0.985	TRUE	12.61	12.26	14.25	1053201472	0.4	0.983	TRUE	12.6	12.31	13.31	9365094	1.8	0.9838	TRUE	12.61	12.34	13.05	79666568	2.1	0.9871	TRUE	12.58	12.32	13.7	213483264	0.7	0.9841	TRUE
sp|P02666|CASB_BOVIN	NIPPL	277.1708++	2	277.171	NIPPL	12.67	12.52	12.93	4058469	0.8	0.9194	TRUE	12.67	12.3	12.95	7144234	-0.1	0.9149	TRUE	12.62	12.26	14.25	18531794	0.6	0.9555	TRUE	12.6	12.31	13.31	472215	1.5	0.9802	TRUE	12.62	12.34	13.05	3312452	1.2	0.9856	TRUE	12.55	12.32	13.7	7613969	-0.4	0.9784	TRUE
sp|P02666|CASB_BOVIN	NIPPLTQTPVVVPPFLQPE	1043.5828++	2	1043.58	NIPPLTQTPVVVPPFLQPE	21.58	21.32	21.86	323921792	0.4	0.9952	TRUE	21.57	21.3	21.86	297289312	0	0.995	TRUE	21.41	21.1	21.78	263555200	0.9	0.9907	TRUE
sp|P02666|CASB_BOVIN	NIPPLTQTPVVVPPFLQPE	696.0576+++	3	696.058	NIPPLTQTPVVVPPFLQPE	21.59	21.32	21.86	548487616	0.5	0.9966	TRUE	21.57	21.3	21.86	490596096	0.1	0.9957	TRUE	21.46	21.1	21.78	464056448	0.6	0.9947	TRUE								21.34	21.14	21.52	97790	3	0.9724	ALIGNED	21.36	21.16	21.4	88217	-1.9	0.8942	ALIGNED
sp|P02666|CASB_BOVIN	NIPPLT	654.3821+	1	654.382	NIPPLT	11.36	11	12.44	492924800	-0.2	0.9816	TRUE	11.33	10.98	12.44	450081568	-0.4	0.9837	ALIGNED	11.36	10.96	12.78	586780160	0.1	0.9777	TRUE	11.14	10.85	11.27	1074740	-2.3	0.8582	ALIGNED	11.19	10.82	11.93	4236208	-0.5	0.8623	ALIGNED
sp|P02666|CASB_BOVIN	NIPPLTQTPVVVPPFLQPEV	1093.1170++	2	1093.12	NIPPLTQTPVVVPPFLQPEV	22	21.9	22.12	155383296	2.4	0.9971	TRUE	21.99	21.9	22.11	153540512	2	0.9928	TRUE	21.97	21.86	22.1	130581512	2.2	0.9988	TRUE
sp|P02666|CASB_BOVIN	NIPPLTQTPVVVPPFLQ	620.6925+++	3	620.692	NIPPLTQTPVVVPPFLQ	21.66	21.48	21.94	19124540	1.6	0.9864	TRUE	21.63	21.46	21.97	17752400	1.2	0.9864	TRUE	21.69	21.35	21.8	1990928	-2	0.9544	ALIGNED
sp|P02666|CASB_BOVIN	NIPPLTQTPV	1079.6095+	1	1079.61	NIPPLTQTPV	13.89	13.72	14.28	494753088	0.2	0.9946	TRUE	13.87	13.7	14.23	512954816	-0.3	0.9962	TRUE	13.83	13.67	14.17	471911648	0.3	0.9948	TRUE								13.82	13.67	14.06	917633	1.5	0.9562	ALIGNED	13.84	13.63	14.1	3560582	-0.1	0.9854	ALIGNED
sp|P02666|CASB_BOVIN	NIPPLTQT	883.4884+	1	883.488	NIPPLTQT	11.1	10.86	11.93	6416545792	-0.8	0.9932	ALIGNED	11.04	10.84	12.14	6344144896	-1.1	0.9941	TRUE	11.09	10.83	12.12	4027333632	-0.6	0.9932	TRUE
sp|P02666|CASB_BOVIN	NIPPLTQTPVVVPPFL	866.5058++	2	866.506	NIPPLTQTPVVVPPFL	22.1	22.02	22.24	27118306	3.3	0.9976	ALIGNED	22.08	22.01	22.23	29473140	2.8	0.9954	TRUE	21.9	21.86	21.92	31483	4.6	0.8699	ALIGNED
sp|P02666|CASB_BOVIN	IPP	326.2074+	1	326.207	IPP	4.23	4.01	4.66	40389064	-0.6	0.9282	ALIGNED	4.21	3.44	4.63	123633336	-0.6	0.9675	ALIGNED	4.36	4.33	4.52	1780205	-0.4	0.8854	ALIGNED	4.37	3.52	6.1	92578680	-0.6	0.9848	TRUE	4.67	4.55	5.94	302489824	-1.2	0.9868	TRUE	4.34	3.63	5.53	78543544	-1.8	0.9819	TRUE
sp|P02666|CASB_BOVIN	IPPLTQTP	433.7527++	2	433.753	IPPLTQTP															12.11	12.02	12.39	7552152	1	0.9526	ALIGNED	12.04	11.33	12.83	2183055	3.4	0.9487	ALIGNED	11.8	11.58	11.82	1458460	3	0.9791	ALIGNED	12.03	11.24	12.78	23495456	1.8	0.9779	TRUE
sp|P02666|CASB_BOVIN	IPPLTQ	669.3818+	1	669.382	IPPLTQ[+1]	11.49	11.12	11.92	38393404	1.9	0.8714	ALIGNED	10.92	10.75	10.96	6624479	-1.6	0.842	ALIGNED								11.05	10.56	12.35	39883612	0	0.992	TRUE	11.08	10.61	12.19	224609824	-0.9	0.9916	TRUE	11.05	10.61	11.96	20822252	-2.8	0.9939	TRUE
sp|P02666|CASB_BOVIN	IPPLTQ	335.1945++	2	335.195	IPPLTQ[+1]	11.36	11.12	11.92	4984983	0.4	0.8938	ALIGNED															11.18	10.56	12.35	19202170	-0.2	0.9832	TRUE	11.08	10.61	12.19	78780976	-0.9	0.9796	TRUE	11.2	10.61	11.96	6515239	-1.9	0.9311	TRUE
sp|P02666|CASB_BOVIN	IPPLTQTPVVVPP	679.9001++	2	679.9	IPPLTQ[+1]TPVVVPP	17.07	16.89	17.3	4550292	2.5	0.8855	ALIGNED	17.01	16.77	17.36	9598337	0.8	0.9309	ALIGNED								16.91	16.01	17.92	5591644	4.3	0.9734	ALIGNED	16.89	15.96	17.83	23765248	4.5	0.979	TRUE
sp|P02666|CASB_BOVIN	IPPLTQT	770.4294+	1	770.429	IPPLTQ[+1]T								11.48	11.4	11.58	8869780	-1.6	0.8654	TRUE															11.47	11.44	11.59	99699	0.2	0.8259	ALIGNED
sp|P02666|CASB_BOVIN	IPPLTQ	668.3978+	1	668.398	IPPLTQ	10.07	9.95	10.1	1423571	-2.5	0.8321	ALIGNED								10.78	10.66	10.89	22757900	0.3	0.9748	ALIGNED								10.34	9.67	11.57	45805432	0.3	0.9419	TRUE	10.47	9.7	11.43	33049216	0	0.9574	TRUE
sp|P02666|CASB_BOVIN	IPPLTQ	334.7025++	2	334.703	IPPLTQ															10.78	10.66	10.89	2747164	0.6	0.9397	ALIGNED	10.31	9.79	10.46	5424152	0.5	0.9567	ALIGNED	10.39	9.67	11.57	41279716	-0.1	0.9748	TRUE	10.34	9.7	11.43	30986204	-0.3	0.9811	TRUE
sp|P02666|CASB_BOVIN	IPPL	439.2915+	1	439.291	IPPL	11.78	11.5	12.73	872736000	0.1	0.9654	ALIGNED	11.8	11.48	12.7	829708928	-0.4	0.9646	ALIGNED	12.82	12.7	13.33	530364192	0.3	0.969	ALIGNED	11.78	11.49	13.11	471535904	0.8	0.9892	TRUE	11.84	11.53	12.69	1857584384	0.4	0.9889	TRUE	11.82	11.52	12.71	1385713920	-0.3	0.9882	TRUE
sp|P02666|CASB_BOVIN	IPPLTQTPVVVPPF	752.9423++	2	752.942	IPPLTQTPVVVPPF	20.76	20.25	21.83	107967104	0	0.9924	TRUE	20.72	20.22	21.77	103877072	-0.9	0.9833	TRUE	20.54	20.18	21.08	10615219	1.2	0.9528	ALIGNED	20.47	20.09	21.52	2447581	-2.2	0.9152	ALIGNED	20.44	19.99	21.69	7267287	-1.6	0.8854	ALIGNED	20.38	19.92	21.1	1973724	2.4	0.9865	ALIGNED
sp|P02666|CASB_BOVIN	IPPLTQTPV	966.5506+	1	966.551	IPPLTQ[+1]TPV	14.39	14.22	14.89	46042504	-1.6	0.9694	TRUE	14.32	14.17	14.82	43781944	-1.8	0.97	TRUE								14.24	13.59	15.22	7633504	2.9	0.9882	TRUE	14.22	13.68	15.13	19278554	2.9	0.9868	TRUE	14.2	13.93	14.36	3197246	0.8	0.9945	TRUE
sp|P02666|CASB_BOVIN	IPPLTQTPV	483.7790++	2	483.779	IPPLTQ[+1]TPV	14.39	14.22	14.89	50532144	-1.1	0.9865	TRUE	14.37	14.17	14.82	42833336	-1.6	0.9691	TRUE	14.29	14.25	14.4	2199064	-1.4	0.9628	ALIGNED	14.13	13.59	15.22	27779410	1.7	0.988	TRUE	14.09	13.68	15.13	46848600	1.8	0.9855	TRUE	14.2	13.93	14.36	6598803	0.6	0.86	TRUE
sp|P02666|CASB_BOVIN	IPPLT	540.3392+	1	540.339	IPPLT	10.78	10.2	11.95	388715168	-4.2	0.9061	ALIGNED															11.05	10.24	12.18	85015896	0.9	0.9886	TRUE	11.07	10.29	11.93	327847360	0.2	0.9881	TRUE	10.76	10.46	10.77	4360801	1.4	0.9907	TRUE
sp|P02666|CASB_BOVIN	IPPLT	270.6732++	2	270.673	IPPLT																						10.85	10.24	12.18	5705698	0.4	0.9737	TRUE	10.88	10.29	11.93	14837392	0	0.9701	TRUE	10.72	10.46	10.77	283366	0.4	0.8907	TRUE
sp|P02666|CASB_BOVIN	IPPLTQTPV	965.5666+	1	965.567	IPPLTQTPV															13.55	13.16	14.52	118802536	0.2	0.9962	TRUE															13.53	13.08	14.51	52420784	-3.4	0.9346	TRUE
sp|P02666|CASB_BOVIN	IPPLTQTPV	483.2869++	2	483.287	IPPLTQTPV	13.71	13.2	14.28	88087632	1.4	0.9681	TRUE	13.72	13.2	14.13	66011612	0.7	0.9709	ALIGNED	13.6	13.16	14.52	217225904	1.2	0.9896	TRUE								14.09	13.13	14.11	23283684	0.5	0.9841	ALIGNED	13.57	13.08	14.51	172067360	0.4	0.9971	TRUE
sp|P02666|CASB_BOVIN	PPL	326.2074+	1	326.207	PPL	15.65	15.33	16.19	76940800	-0.1	0.9625	TRUE	15.57	15.26	16.3	76390656	-0.7	0.9642	TRUE	15.52	15.15	16.13	129223912	0.3	0.9701	TRUE	14.97	14.7	15.42	714433	0.8	0.9363	ALIGNED	15	14.64	15.25	3180195	2	0.9488	TRUE	14.93	14.63	15.24	17109318	1.6	0.9713	TRUE
sp|P02666|CASB_BOVIN	PPLTQTPV	852.4825+	1	852.483	PPLTQTPV																																				15.62	15.57	15.65	33617	2	0.8729	ALIGNED
sp|P02666|CASB_BOVIN	PPLTQT	656.3614+	1	656.361	PPLTQT	11.05	10.86	11.19	466381024	-0.7	0.9865	TRUE	11.01	10.77	11.23	479067008	-0.8	0.9851	TRUE	11.01	10.84	11.22	426004192	-0.2	0.9902	TRUE	10.87	10.8	10.96	44855	3.3	0.8109	ALIGNED	10.86	10.79	10.96	223340	4.6	0.8317	ALIGNED
sp|P02666|CASB_BOVIN	PPLTQTPVVVPPFLQPE	930.0193++	2	930.019	PPLTQTPVVVPPFLQPE															21.7	21.43	21.86	8570126	2.9	0.9727	TRUE
sp|P02666|CASB_BOVIN	PPLTQTPVVVPPFLQPEVMGVSKV	1280.2164++	2	1280.22	PPLTQTPVVVPPFLQPEVMGVSKV								21.15	21.02	21.25	3263101	4.3	0.9195	ALIGNED	20.99	20.86	21.28	20684102	4	0.9873	TRUE
sp|P02666|CASB_BOVIN	PLTQTP	656.3614+	1	656.361	PLTQTP	11.37	11.34	11.81	185336640	0.4	0.9942	TRUE	11.45	11.42	11.53	19123934	0	0.9541	TRUE	11.71	11.71	12.15	63959780	1.4	0.99	ALIGNED															11.81	11.77	11.96	273918	3	0.8382	ALIGNED
sp|P02666|CASB_BOVIN	LTQTP	320.6331++	2	320.633	LT[+80]Q[+1]TP								11	10.96	11.06	1059845	2.1	0.8288	ALIGNED								11.09	11.03	11.21	395734	2.6	0.9737	ALIGNED	11.11	11.01	11.24	7197344	2.7	0.9599	TRUE	11.09	11.01	11.23	14584079	1.4	0.9897	TRUE
sp|P02666|CASB_BOVIN	TQTPVVVPPFLQPE	776.4245++	2	776.424	TQTPVVVPPFLQPE	19.08	18.81	19.32	51529228	-1.7	0.9773	TRUE	19.07	18.83	19.2	60409024	-1.8	0.9774	TRUE	18.99	18.67	19.16	119979000	-1.2	0.9862	TRUE	18.91	18.73	19.13	543998	2.8	0.9547	ALIGNED	18.84	18.57	19.01	3789905	3.7	0.9956	ALIGNED	18.77	18.5	18.94	8742645	-0.4	0.9967	TRUE
sp|P02666|CASB_BOVIN	TQTPVVVPPFLQPE	517.9521+++	3	517.952	TQTPVVVPPFLQPE	19.03	18.81	19.32	9521246	-2	0.8747	TRUE	19.06	18.83	19.2	10742606	-2.2	0.8804	TRUE	18.94	18.67	19.16	19001436	-1.3	0.9274	TRUE	18.91	18.73	19.13	83124	0.2	0.8823	ALIGNED	18.84	18.57	19.01	736562	3.7	0.995	ALIGNED	18.77	18.5	18.94	1400141	0.6	0.9659	TRUE
sp|P02666|CASB_BOVIN	TQTPV	546.2770+	1	546.277	TQ[+1]TPV
sp|P02666|CASB_BOVIN	TQTPVVVPPFLQPEV	825.9587++	2	825.959	TQTPVVVPPFLQPEV	20.5	20.1	20.67	34097536	0.2	0.9923	ALIGNED	20.49	20.09	20.66	37865444	0	0.9819	ALIGNED	20.41	20.1	20.54	49868016	-0.4	0.99	TRUE															20.08	19.9	20.15	43811	1.8	0.9527	ALIGNED
sp|P02666|CASB_BOVIN	TQTPV	545.2930+	1	545.293	TQTPV	5.21	5.14	5.31	30156454	0.3	0.9647	TRUE	5.21	5.12	5.3	39465652	-0.3	0.9829	ALIGNED	5.22	5.15	5.32	91491224	-0.2	0.9765	ALIGNED								5.3	5.15	5.39	13812283	-4.3	0.8763	ALIGNED	5.29	5.18	5.39	17944648	-2.2	0.9877	ALIGNED
sp|P02666|CASB_BOVIN	QTPVVVPPFLQPE	725.9007++	2	725.901	QTPVVVPPFLQPE	19.05	18.77	19.23	28900514	-2.2	0.981	ALIGNED	19.08	18.81	19.21	29769752	-1.6	0.9645	ALIGNED	18.93	18.74	19.11	35239368	-2.7	0.9943	TRUE	18.9	18.77	19.03	234579	2.1	0.9738	ALIGNED	18.83	18.65	18.97	815328	3.2	0.9953	ALIGNED	18.76	18.58	18.91	3002918	-1.2	0.9638	ALIGNED
sp|P02666|CASB_BOVIN	TPVVVPP	708.4291+	1	708.429	TPVVVPP	10.94	10.85	11.24	29836618	-1.5	0.963	ALIGNED	10.91	10.83	11.16	30218032	-1.5	0.9455	ALIGNED	10.91	10.82	11.1	13714551	-1.4	0.9464	ALIGNED	10.94	10.79	11.33	4341562	0.7	0.9936	TRUE	11.04	10.77	11.82	36969576	0	0.9887	TRUE	11.04	10.81	11.31	7841190	-2.2	0.9408	ALIGNED
sp|P02666|CASB_BOVIN	TPVVVPP	354.7182++	2	354.718	TPVVVPP	10.97	10.85	11.24	6520625	-1.3	0.8999	ALIGNED	10.91	10.83	11.16	7018209	-1.7	0.9054	ALIGNED	10.92	10.82	11.1	3718427	-0.4	0.9083	ALIGNED	10.94	10.79	11.33	3627284	0.1	0.9757	TRUE	10.93	10.77	11.82	19559716	-0.5	0.9784	TRUE	10.93	10.81	11.31	3813492	-1.7	0.9571	ALIGNED
sp|P02666|CASB_BOVIN	TPVVVPPFLQP	597.3501++	2	597.35	TPVVVPPFLQP	19.67	19.33	19.86	22387840	-0.4	0.99	TRUE	19.64	19.46	19.8	9761142	-1	0.9905	ALIGNED	19.55	19.21	19.77	4685704	-0.3	0.9661	ALIGNED	19.47	19.27	19.67	2230506	0.8	0.9802	ALIGNED	19.44	19.13	19.6	4075806	3.5	0.9877	ALIGNED	19.38	19.04	19.56	1905645	3.3	0.9892	ALIGNED
sp|P02666|CASB_BOVIN	TPVVVPPFLQPEV	711.4056++	2	711.406	TPVVVPPFLQPEV	20.45	20.32	20.54	15091648	-4.6	0.9878	TRUE	20.43	20.29	20.5	15445549	-4.1	0.9828	TRUE																						20.15	20.04	20.33	112336	3.4	0.9565	ALIGNED
sp|P02666|CASB_BOVIN	TPVVVPPFLQPEVM	776.9258++	2	776.926	TPVVVPPFLQPEVM	21.49	21.39	21.59	11720343	-0.9	0.9872	TRUE	21.5	21.34	21.57	13731956	-1.1	0.9935	TRUE								21.29	21.18	21.38	104002	2.6	0.9672	ALIGNED	21.21	21.1	21.3	163940	4	0.9435	ALIGNED	21.14	20.96	21.29	2432862	-1.9	0.9758	ALIGNED
sp|P02666|CASB_BOVIN	TPVVVPPFLQPE	661.8714++	2	661.871	TPVVVPPFLQPE	19.09	18.82	19.28	90325200	-0.5	0.9962	TRUE	19.1	18.8	19.27	75208848	-0.6	0.9939	TRUE	19	18.57	19.15	111463456	-0.4	0.9949	TRUE	18.93	18.71	19.09	3678791	2.1	0.9898	TRUE	18.89	18.62	19.05	5790912	4	0.992	TRUE	18.81	18.55	18.99	12660736	0.8	0.9917	TRUE
sp|P02666|CASB_BOVIN	TPVVVPPF	855.4975+	1	855.497	TPVVVPPF	17.07	16.92	17.57	165416624	-0.7	0.9918	TRUE	17.07	16.91	17.51	156336944	-0.8	0.9914	TRUE	17.01	16.85	17.45	45130220	1.4	0.9858	TRUE	16.96	16.78	17.52	6110267	2	0.9951	TRUE	16.94	16.74	17.5	18625730	2.5	0.9844	TRUE	16.9	16.72	17.46	7554878	2.8	0.9773	TRUE
sp|P02666|CASB_BOVIN	TPVVVPPF	428.2524++	2	428.252	TPVVVPPF	17.07	16.92	17.57	163606816	-0.3	0.9889	TRUE	17.07	16.91	17.51	150338624	-0.5	0.9873	TRUE	17.03	16.85	17.45	60129940	0.5	0.9844	TRUE	16.96	16.78	17.52	19332822	1.8	0.9962	TRUE	16.94	16.74	17.5	45224216	3	0.9957	TRUE	16.9	16.72	17.46	21004118	3.4	0.9924	TRUE
sp|P02666|CASB_BOVIN	TPVVVPPFL	968.5815+	1	968.582	TPVVVPPFL	20.45	20.3	20.68	19414844	0	0.9626	TRUE	20.43	20.3	20.69	21956308	-0.1	0.9689	TRUE	20.28	20.16	20.36	89076	2.8	0.9202	ALIGNED	20.24	20.13	20.49	4465993	2.7	0.9873	TRUE	20.19	20.08	20.46	27364214	1.5	0.9932	TRUE	20.14	20.03	20.43	8649184	4.4	0.9922	TRUE
sp|P02666|CASB_BOVIN	TPVVVPPFL	484.7944++	2	484.794	TPVVVPPFL	20.44	20.3	20.68	32175950	-0.9	0.9825	TRUE	20.43	20.3	20.69	33658932	-1	0.9876	TRUE								20.24	20.13	20.49	21370236	2.3	0.9961	TRUE	20.21	20.08	20.46	87669776	1.3	0.9955	TRUE	20.14	20.03	20.43	31618744	3.6	0.9976	TRUE
sp|P02666|CASB_BOVIN	PVVV	413.2758+	1	413.276	PVVV	8.58	8.49	8.75	45211828	0	0.9721	TRUE	8.58	8.49	8.75	42921896	-0.6	0.9694	ALIGNED	8.67	8.52	8.8	29406576	-0.3	0.9567	ALIGNED	8.6	8.53	8.69	291425	1.4	0.8808	ALIGNED	8.66	8.55	8.78	2012858	0.3	0.9479	ALIGNED	8.67	8.6	8.72	185152	2.2	0.875	ALIGNED
sp|P02666|CASB_BOVIN	PVVVPPFLQPEVMGVS	855.9604++	2	855.96	PVVVPPFLQPEVM[+16]GVS	19.95	19.69	20.19	18729968	2.8	0.9927	TRUE	19.9	19.67	20.09	6913965	2.7	0.9926	TRUE	19.79	19.55	19.92	4642786	4.3	0.9946	ALIGNED
sp|P02666|CASB_BOVIN	PVVVPPFLQPEVM	1451.7967+	1	1451.8	PVVVPPFLQPEVM	21.58	21.41	21.72	495649824	-0.1	0.9949	TRUE	21.57	21.39	21.7	527728224	-0.5	0.9956	TRUE	21.45	21.27	21.59	14456696	1	0.9939	TRUE
sp|P02666|CASB_BOVIN	PVVVPPFLQPEVM	726.4020++	2	726.402	PVVVPPFLQPEVM	21.58	21.41	21.72	4463587328	0.1	0.994	TRUE	21.57	21.39	21.7	4464881664	-0.2	0.9957	TRUE	21.45	21.27	21.59	150516928	0	0.9945	TRUE	21.36	21.25	21.47	93420	3.2	0.8901	ALIGNED	21.31	21.2	21.42	86448	5	0.9765	ALIGNED	21.23	21.1	21.37	707654	2.4	0.9609	ALIGNED
sp|P02666|CASB_BOVIN	PVVVPPFLQPEVM	484.6037+++	3	484.604	PVVVPPFLQPEVM	21.58	21.41	21.72	64835272	-0.5	0.9828	TRUE	21.55	21.39	21.7	61450624	-1	0.989	TRUE	21.45	21.27	21.59	1881462	0	0.9775	TRUE
sp|P02666|CASB_BOVIN	PVVVPPFLQPEV	661.3737++	2	661.374	PVVVPPFLQ[+1]PEV	21.15	21.02	21.29	13708496	2.5	0.9842	TRUE	21.12	20.98	21.14	3037223	-1.6	0.9157	TRUE
sp|P02666|CASB_BOVIN	PVVVPPFLQ	995.5924+	1	995.592	PVVVPPFLQ	19.02	18.84	19.15	289582656	-1.4	0.9932	TRUE	19.02	18.83	19.14	247377296	-1.6	0.9905	TRUE	18.92	18.72	18.99	13329073	-1.2	0.9636	TRUE	18.7	18.3	18.95	451910	3.3	0.9814	ALIGNED
sp|P02666|CASB_BOVIN	PVVVPPFLQ	498.2999++	2	498.3	PVVVPPFLQ	19.01	18.84	19.15	677609216	-1.4	0.9937	TRUE	19	18.83	19.14	551028160	-1.5	0.9913	TRUE	18.92	18.72	18.99	22372332	-0.1	0.9932	TRUE	18.7	18.3	18.95	3049653	-0.6	0.9416	ALIGNED	18.65	18.55	19.12	2327400	2.2	0.8985	ALIGNED	18.6	18.44	18.67	1406240	1.2	0.9744	ALIGNED
sp|P02666|CASB_BOVIN	PVVVPPFL	867.5339+	1	867.534	PVVVPPFL	20.51	20.38	20.85	733765824	-1.7	0.9936	TRUE	20.5	20.37	20.83	707706624	-1.6	0.9942	TRUE	20.41	20.27	20.72	73711344	-1	0.9943	TRUE	20.34	20.19	20.63	2679443	3.3	0.9858	TRUE	20.29	20.16	20.61	14524122	3	0.9874	TRUE	20.23	20.05	20.52	2842642	4.3	0.9933	TRUE
sp|P02666|CASB_BOVIN	PVVVPPFL	434.2706++	2	434.271	PVVVPPFL	20.54	20.38	20.85	527038368	-1.2	0.9896	TRUE	20.52	20.37	20.83	484404448	-1.1	0.9942	TRUE	20.41	20.27	20.72	53595612	-0.6	0.9946	TRUE	20.34	20.19	20.63	4102770	2.9	0.995	TRUE	20.29	20.16	20.61	16308453	2.4	0.9955	TRUE	20.23	20.05	20.52	3281460	3.4	0.9933	TRUE
sp|P02666|CASB_BOVIN	PVVVPPFLQPEV	1320.7562+	1	1320.76	PVVVPPFLQPEV	20.51	20.29	20.63	1577060864	-1	0.9948	TRUE	20.48	20.27	20.6	1476427008	-1	0.9949	TRUE	20.39	20.15	20.48	585581440	-0.3	0.9958	TRUE
sp|P02666|CASB_BOVIN	PVVVPPFLQPEV	660.8817++	2	660.882	PVVVPPFLQPEV	20.5	20.29	20.63	12198742016	-0.6	0.9945	TRUE	20.48	20.27	20.6	11317753856	-0.5	0.9963	TRUE	20.38	20.15	20.48	5686581248	0.1	0.9957	TRUE
sp|P02666|CASB_BOVIN	PVVVPPFLQPEV	440.9236+++	3	440.924	PVVVPPFLQPEV	20.51	20.29	20.63	38568720	-1.3	0.9945	TRUE	20.48	20.27	20.6	34023144	-1.3	0.9896	TRUE	20.36	20.15	20.48	17634226	-0.4	0.9958	TRUE
sp|P02666|CASB_BOVIN	PVVVPPFLQ	498.7919++	2	498.792	PVVVPPFLQ[+1]	19.53	19.36	19.64	20646282	-0.6	0.9733	TRUE	19.49	19.36	19.62	10911596	-0.3	0.99	ALIGNED	19.41	19.24	19.51	3753769	0.7	0.9667	ALIGNED
sp|P02666|CASB_BOVIN	PVVVPPFLQP	1092.6452+	1	1092.65	PVVVPPFLQP	19.7	19.4	19.84	26817628	0.3	0.9902	TRUE	19.64	19.32	19.84	25216058	0.1	0.9891	TRUE	19.55	19.28	19.74	8603846	1.1	0.9823	TRUE	19.48	19.35	19.7	57814	4.2	0.8936	ALIGNED
sp|P02666|CASB_BOVIN	PVVVPPFLQP	546.8262++	2	546.826	PVVVPPFLQP	19.67	19.4	19.84	149022736	-0.1	0.9877	TRUE	19.64	19.32	19.84	136413104	-0.2	0.9966	TRUE	19.55	19.28	19.74	47591704	1	0.9919	TRUE	19.48	19.35	19.7	672191	4.3	0.9263	ALIGNED	19.45	19.11	19.6	1579258	4.4	0.9902	TRUE
sp|P02666|CASB_BOVIN	PVVVPPF	754.4498+	1	754.45	PVVVPPF	17.02	16.79	17.63	3279139328	-0.7	0.9941	TRUE	16.99	16.78	17.59	3252318208	-0.9	0.9941	TRUE	16.91	16.71	17.51	4044644096	0	0.9941	TRUE	16.86	16.66	17.35	5822042	0.9	0.9492	TRUE	16.87	16.64	17.49	21531458	3.3	0.9872	TRUE	16.81	16.64	17.19	2497523	1.5	0.8789	ALIGNED
sp|P02666|CASB_BOVIN	PVVVPPF	377.7285++	2	377.729	PVVVPPF	17	16.79	17.63	1172872192	-0.6	0.9913	TRUE	16.98	16.78	17.59	1132399488	-0.9	0.9931	TRUE	16.89	16.71	17.51	1539541120	-0.1	0.9938	TRUE								16.85	16.64	17.49	11615236	2.7	0.9866	TRUE	16.81	16.64	17.19	1529069	2.1	0.9796	ALIGNED
sp|P02666|CASB_BOVIN	PVVVPPFLQPE	1222.6718+	1	1222.67	PVVVPPFLQ[+1]PE	19.51	19.32	19.59	13213794	0.4	0.9919	TRUE	19.48	19.37	19.57	9364741	0.3	0.9765	TRUE	19.36	19.27	19.47	1956807	2.5	0.9725	ALIGNED
sp|P02666|CASB_BOVIN	PVVVPPFLQPE	611.8395++	2	611.84	PVVVPPFLQ[+1]PE	19.51	19.32	19.59	58346860	0	0.9966	TRUE								19.39	19.27	19.47	12411127	0.8	0.9688	ALIGNED	19.3	19.21	19.4	78962	0.6	0.9423	ALIGNED	19.28	19.17	19.38	188147	3.9	0.939	ALIGNED	19.21	19.1	19.3	133189	4.3	0.9478	ALIGNED
sp|P02666|CASB_BOVIN	PVVVPP	607.3814+	1	607.381	PVVVPP	10.15	10.08	10.41	73029600	-0.2	0.9723	TRUE	10.18	10.05	10.43	81106464	-0.6	0.9587	TRUE	10.16	10.08	10.38	198183552	-0.3	0.9824	TRUE	10.3	10.16	10.82	6092325	0.9	0.9876	TRUE	10.31	10.17	10.97	56121708	0.5	0.988	TRUE
sp|P02666|CASB_BOVIN	PVVVPPFLQPEVM	726.8940++	2	726.894	PVVVPPFLQ[+1]PEVM
sp|P02666|CASB_BOVIN	PVVVPPFLQPEVMG	754.9127++	2	754.913	PVVVPPFLQPEVMG	21.28	21.12	21.44	471134944	-1.8	0.9966	TRUE	21.27	21.1	21.4	379786816	-1.8	0.9914	TRUE	21.15	21.02	21.27	93138160	-1.4	0.9838	TRUE								20.89	20.85	21.02	29566	1.2	0.9674	ALIGNED	20.83	20.78	20.94	29027	2.6	0.8398	ALIGNED
sp|P02666|CASB_BOVIN	PVVVPPFLQPEVMG	503.6109+++	3	503.611	PVVVPPFLQPEVMG	21.31	21.12	21.44	23978704	-2.2	0.9681	TRUE	21.27	21.1	21.4	19343012	-2.2	0.9817	TRUE	21.13	21.02	21.27	4168773	-2.8	0.9115	TRUE
sp|P02666|CASB_BOVIN	PVVVPPFLQPE	1221.6878+	1	1221.69	PVVVPPFLQPE	19.05	18.85	19.23	3848351744	-1.1	0.9953	TRUE	19.02	18.82	19.22	3602708480	-1.2	0.9953	TRUE	18.93	18.74	19.13	2838519296	-0.6	0.9956	TRUE								18.83	18.63	18.99	77151	4.8	0.9244	ALIGNED
sp|P02666|CASB_BOVIN	PVVVPPFLQPE	611.3475++	2	611.348	PVVVPPFLQPE	19.05	18.85	19.23	18098225152	-0.9	0.9938	TRUE	19.02	18.82	19.22	16500856832	-1.1	0.9954	TRUE	18.93	18.74	19.13	14097232896	-0.4	0.9947	TRUE	18.91	18.71	19.06	1720060	1.7	0.9926	ALIGNED	18.85	18.63	18.99	2351192	3.8	0.9913	ALIGNED	18.79	18.66	18.91	2475311	-0.2	0.9749	ALIGNED
sp|P02666|CASB_BOVIN	PVVVPPFLQPEVMGV	812.4444++	2	812.444	PVVVPPFLQPEVM[+16]GV	20.88	20.58	21.12	48861448	2.4	0.9984	TRUE	20.86	20.68	21.08	27147144	2.2	0.9951	TRUE	20.76	20.61	20.93	15624064	3.7	0.9958	TRUE
sp|P02666|CASB_BOVIN	PVVVPPFLQPEVMGV	541.9653+++	3	541.965	PVVVPPFLQPEVM[+16]GV	20.88	20.58	21.12	15143981	2.5	0.9816	TRUE	20.86	20.68	21.08	8583811	2.4	0.9739	TRUE	20.77	20.61	20.93	5257045	3.4	0.9922	TRUE
sp|P02666|CASB_BOVIN	PVVVPPFLQPEVM	1467.7916+	1	1467.79	PVVVPPFLQPEVM[+16]	19.52	19.29	19.66	27775744	-0.2	0.9851	TRUE	19.48	19.27	19.65	19790794	-0.2	0.9829	TRUE	19.38	19.2	19.55	3817252	1.2	0.9681	TRUE
sp|P02666|CASB_BOVIN	PVVVPPFLQPEVM	734.3994++	2	734.399	PVVVPPFLQPEVM[+16]	19.52	19.29	19.66	623119552	0.3	0.9944	TRUE	19.49	19.27	19.65	456960160	0.2	0.9953	TRUE	19.37	19.2	19.55	130931088	1.6	0.9909	TRUE
sp|P02666|CASB_BOVIN	PVVVPPFLQPEVM	489.9354+++	3	489.935	PVVVPPFLQPEVM[+16]	19.52	19.29	19.66	92590704	-0.6	0.9891	TRUE	19.49	19.27	19.65	70754088	-0.7	0.9935	TRUE	19.37	19.2	19.55	21036008	0.4	0.9891	TRUE														ALIGNED	19.22	19.22	19.52	18860	1.2	0.959	ALIGNED
sp|P02666|CASB_BOVIN	VVVPPFL	770.4811+	1	770.481	VVVPPFL	19.6							19.58	19.46	19.76	7314538	-0.3	0.9587	ALIGNED								19.43	19.31	19.83	4781178	2	0.9934	TRUE	19.4	19.27	19.87	27869714	4	0.9901	TRUE	19.34	19.22	19.8	24948396	4.2	0.9905	TRUE
sp|P02666|CASB_BOVIN	VVVPPFL	385.7442++	2	385.744	VVVPPFL	19.62	19.5	19.79	2480834	-0.9	0.9317	ALIGNED	19.58	19.46	19.76	3785310	-0.8	0.9473	ALIGNED								19.43	19.31	19.83	4291720	2	0.9769	TRUE	19.4	19.27	19.87	21715478	3	0.9924	TRUE	19.34	19.22	19.8	19497102	3.2	0.9922	TRUE
sp|P02666|CASB_BOVIN	VVVPP	510.3286+	1	510.329	VVVPP																						8.28	8.13	9.26	9204665	0.9	0.982	TRUE	8.38	8.16	9.72	75682080	0.7	0.9795	TRUE	8.35	8.15	9.4	41872660	0.1	0.9874	TRUE
sp|P02666|CASB_BOVIN	VVVPPFLQPEV	612.3554++	2	612.355	VVVPPFLQPEV	19.79	19.58	19.93	62823552	2.1	0.9852	TRUE	19.77	19.56	19.92	61359636	1.6	0.9852	ALIGNED	19.66	19.44	19.82	44767384	3.2	0.9821	TRUE								19.56	19.53	19.69	24088	2.7	0.9394	ALIGNED	19.49	19.4	19.62	90869	3	0.9737	ALIGNED
sp|P02666|CASB_BOVIN	VVVPPF	657.3970+	1	657.397	VVVPPF	15.78	15.58	16.45	41756192	0.4	0.976	TRUE	15.75	15.58	16.41	45954676	-0.1	0.978	TRUE	15.68	15.47	16.18	75792384	1.4	0.9853	TRUE	15.66	15.46	16.29	5693163	0.7	0.9596	TRUE	15.65	15.44	16.52	28865072	1.6	0.9749	TRUE	15.62	15.43	16.51	198481568	1.5	0.9908	TRUE
sp|P02666|CASB_BOVIN	VVVPPF	329.2022++	2	329.202	VVVPPF	15.77	15.58	16.45	10737247	0.1	0.9667	TRUE	15.78	15.58	16.41	12144844	-0.3	0.9762	TRUE	15.68	15.47	16.18	20923500	1	0.9797	TRUE	15.62	15.46	16.29	3082828	-0.3	0.9041	TRUE	15.65	15.44	16.52	9524495	0.7	0.9938	TRUE	15.62	15.43	16.51	66793692	1	0.9884	TRUE
sp|P02666|CASB_BOVIN	VVVPPFLQPE	562.8211++	2	562.821	VVVPPFLQPE								18.14	18.01	18.38	1666786560	-1	0.9974	ALIGNED	18.06	17.92	18.33	1366955648	-0.5	0.9971	ALIGNED	18.09	17.93	18.29	1906660	2.3	0.991	ALIGNED	18.04	17.86	18.26	4652079	3.8	0.9871	ALIGNED	17.97	17.77	18.21	9709775	3.1	0.9919	TRUE
sp|P02666|CASB_BOVIN	VVPPFLQPE	513.2869++	2	513.287	VVPPFLQPE	16.35	16.21	16.64	1697244032	-0.5	0.9968	ALIGNED	16.34	16.2	16.57	1745232256	-0.7	0.9939	ALIGNED	16.27	16.12	16.52	2141569536	0	0.9948	TRUE	16.21	16.05	16.54	3080436	1.9	0.9904	ALIGNED	16.18	16	16.47	10651745	0	0.9867	ALIGNED	16.13	16.01	16.42	39604020	0.7	0.9667	ALIGNED
sp|P02666|CASB_BOVIN	VVPP	411.2602+	1	411.26	VVPP	6.29	6.08	6.87	21612128	0.5	0.9228	ALIGNED	6.19	6.06	6.38	15974215	-0.5	0.8828	ALIGNED	6.2	6.08	6.98	33428232	0.3	0.9421	ALIGNED	6.19	6.06	6.87	5927504	0.3	0.983	TRUE	6.23	6.1	6.96	26517644	0.4	0.9873	TRUE	6.25	6.1	6.97	5429804	0.2	0.9591	ALIGNED
sp|P02666|CASB_BOVIN	VVPPFLQ	799.4713+	1	799.471	VVPPFLQ
sp|P02666|CASB_BOVIN	VVPPFL	671.4127+	1	671.413	VVPPFL	17.74	17.61	18.23	112020368	0.8	0.9808	TRUE	17.74	17.61	18.22	136874144	0	0.9885	TRUE	17.67	17.54	17.97	21775022	1.4	0.9763	TRUE	17.6	17.45	18.16	5704261	1.6	0.9826	TRUE	17.57	17.45	18.1	31763420	4	0.9881	TRUE	17.52	17.41	17.99	79111792	1	0.9906	TRUE
sp|P02666|CASB_BOVIN	VVPPFL	336.2100++	2	336.21	VVPPFL	17.74	17.61	18.23	23617446	0.7	0.9738	TRUE	17.74	17.61	18.22	28507836	0.3	0.9937	TRUE	17.64	17.54	17.97	4686695	1.7	0.989	TRUE	17.6	17.45	18.16	1903197	0.9	0.983	TRUE	17.57	17.45	18.1	9671875	2.8	0.9898	TRUE	17.52	17.41	17.99	20836934	0.4	0.9883	TRUE
sp|P02666|CASB_BOVIN	VVPPFLQPEV	562.8211++	2	562.821	VVPPFLQPEV	18.14	18	18.42	1460268288	-0.9	0.9952	ALIGNED	18.14	18	18.38	1681834880	-1	0.9958	TRUE	18.06	17.9	18.33	1376313472	-0.5	0.9966	TRUE	18.1	17.93	18.29	1908241	2.4	0.991	ALIGNED	18.03	17.85	18.27	4624628	3.9	0.9861	ALIGNED	17.97	17.79	18.21	9660191	3	0.992	ALIGNED
sp|P02666|CASB_BOVIN	VVPPF	558.3286+	1	558.329	VVPPF	13.78	13.46	14.41	410285600	0.3	0.9954	TRUE	13.77	13.47	14.35	439971040	-0.4	0.9942	TRUE	13.73	13.45	14.29	960698176	0.3	0.9929	TRUE	13.67	13.45	14.19	20758724	0.9	0.9886	TRUE	13.7	13.44	14.33	61159988	1.6	0.9907	TRUE	13.66	13.41	14.29	199341312	1	0.9833	TRUE
sp|P02666|CASB_BOVIN	VVPPF	279.6679++	2	279.668	VVPPF	13.78	13.46	14.41	20470282	0	0.9669	TRUE	13.76	13.47	14.35	22634474	-0.6	0.9629	TRUE	13.73	13.45	14.29	53659156	0	0.9698	TRUE	13.72	13.45	14.19	1741122	0.8	0.9669	TRUE	13.72	13.44	14.33	4240088	1.1	0.9752	TRUE	13.66	13.41	14.29	13349386	0.1	0.9728	TRUE
sp|P02666|CASB_BOVIN	VPP	312.1918+	1	312.192	VPP	2.45	2	3.81	62541224	1.7	0.8815	ALIGNED	2.45	2.05	3.31	75037824	0.7	0.9059	TRUE								2.63	2.04	4.41	51176168	-0.5	0.9882	TRUE	2.71	2.14	5.08	369549504	-0.9	0.9844	TRUE	2.72	2.14	3.64	25242130	-0.5	0.9856	TRUE
sp|P02666|CASB_BOVIN	VPPF	459.2602+	1	459.26	VPPF	11.65	11.16	12.47	774964480	-0.4	0.9873	ALIGNED	11.78	11.76	12.31	282534304	-0.7	0.9902	ALIGNED	11.66	11.15	12.69	356140992	-0.1	0.9917	TRUE	11.71	11.23	12.83	353598944	0.3	0.9861	ALIGNED	11.71	11.28	12.61	1851210880	-0.1	0.9889	TRUE	11.66	11.57	12.84	444572800	-0.1	0.9893	TRUE
sp|P02666|CASB_BOVIN	VPPFLQP	797.4556+	1	797.456	VPPFLQP	15.65	15.44	15.95	33826720	0.8	0.9248	TRUE	15.82	15.45	15.96	18769046	1.8	0.8348	ALIGNED	15.59	15.4	15.87	8726423	-0.3	0.9273	ALIGNED	15.57	15.21	15.88	7751607	1.2	0.9797	TRUE	15.55	15.19	15.93	14676839	0.8	0.9767	TRUE	15.48	15.17	15.83	8223380	2.9	0.974	TRUE
sp|P02666|CASB_BOVIN	VPPFLQP	399.2314++	2	399.231	VPPFLQP	15.67	15.44	15.95	25851282	0	0.9127	TRUE	15.65	15.45	15.96	14862032	-0.2	0.8324	ALIGNED	15.57	15.4	15.87	7674262	-0.1	0.9677	ALIGNED	15.54	15.21	15.88	12839339	1.1	0.9903	TRUE	15.51	15.19	15.93	17234738	0.9	0.9946	TRUE	15.48	15.17	15.83	10525276	2.4	0.9861	TRUE
sp|P02666|CASB_BOVIN	VPPFLQPEVM	586.8046++	2	586.805	VPPFLQPEVM[+16]																						15.6	15.57	15.75	125371	0.3	0.8167	ALIGNED	15.58	15.48	15.75	984204	0.5	0.9698	ALIGNED	15.57	15.38	15.83	3176529	2.3	0.9792	TRUE
sp|P02666|CASB_BOVIN	VPPFL	572.3443+	1	572.344	VPPFL	16.23	15.97	16.68	65887268	0.9	0.9911	ALIGNED	16.22	15.97	16.67	85833264	0.3	0.981	TRUE	16.19	16.06	16.3	2942306	4.4	0.9247	ALIGNED	16.16	15.96	16.72	224897264	1.4	0.9912	TRUE	16.16	15.94	16.72	1063648960	0.3	0.9948	TRUE	16.13	15.89	16.67	523546912	0.9	0.9925	TRUE
sp|P02666|CASB_BOVIN	VPPFL	286.6758++	2	286.676	VPPFL	16.21	15.97	16.68	1979546	0.5	0.888	ALIGNED	16.25	15.97	16.67	2854274	0	0.8873	TRUE	16.17	16.06	16.3	58144	3.9	0.8055	ALIGNED	16.15	15.96	16.72	18379790	0.6	0.983	TRUE	16.18	15.94	16.72	65157740	-0.4	0.9852	TRUE	16.13	15.89	16.67	31023182	0.2	0.9826	TRUE
sp|P02666|CASB_BOVIN	VPPFLQPEV	1025.5666+	1	1025.57	VPPFLQPEV	20.49	20.31	20.61	16802938	-1.8	0.9702	TRUE	20.47	20.32	20.59	16237109	-1.9	0.98	TRUE								16.75	16.45	17.13	105906	-1.8	0.9279	ALIGNED
sp|P02666|CASB_BOVIN	VPPFLQPEV	513.2869++	2	513.287	VPPFLQPEV															16.98	16.73	17.28	47620292	-3.3	0.8263	TRUE	16.88	16.45	17.13	851826	-0.4	0.9495	ALIGNED								16.8	16.69	17.18	1325005	3.3	0.985	ALIGNED
sp|P02666|CASB_BOVIN	VPPFLQPE	926.4982+	1	926.498	VPPFLQPE	14.83	14.65	15.06	43058196	-0.6	0.9741	TRUE	14.8	14.57	15.01	36350928	-1.2	0.9618	TRUE	14.77	14.59	15.05	66240308	-0.1	0.9902	TRUE	14.82	14.61	15.26	6366460	2	0.9977	ALIGNED	14.79	14.59	15.08	14898302	3.6	0.9877	TRUE	14.72	14.56	15.01	36293692	2.4	0.9937	TRUE
sp|P02666|CASB_BOVIN	VPPFLQPE	463.7527++	2	463.753	VPPFLQPE	14.82	14.65	15.06	52537812	0.4	0.9704	TRUE	14.81	14.57	15.01	47060516	-0.1	0.9798	TRUE	14.78	14.59	15.05	90192096	1	0.9839	TRUE	14.81	14.61	15.26	22005148	2.1	0.9969	ALIGNED	14.81	14.59	15.08	36383396	3	0.9956	TRUE	14.76	14.56	15.01	79772824	1.9	0.9944	TRUE
sp|P02666|CASB_BOVIN	VPPFLQ	350.7051++	2	350.705	VPPFLQ																						14.35	14.17	14.53	1014141	1.8	0.9823	ALIGNED	14.32	14.07	14.61	2614033	2.2	0.9807	TRUE	14.35	14.11	14.47	297841	1.1	0.9516	ALIGNED
sp|P02666|CASB_BOVIN	VPPFLQPEVM	578.8072++	2	578.807	VPPFLQPEVM	18.33	18.19	18.53	8690722	-1.3	0.9674	ALIGNED	18.3	18.17	18.5	8284545	-1.5	0.9648	ALIGNED	18.35	18.12	18.37	1434792	-1.8	0.8898	ALIGNED	18.16	18.06	18.42	2681331	1.3	0.9612	ALIGNED	18.15	17.86	18.47	7299854	1.5	0.9824	ALIGNED	18.07	17.76	18.37	34986532	1.3	0.9877	TRUE
sp|P02666|CASB_BOVIN	PPFLQPEVM	1057.5387+	1	1057.54	PPFLQPEVM	21.58	21.47	21.69	15691514	-1.5	0.9705	TRUE	21.54	21.47	21.66	15157473	-2.4	0.978	ALIGNED
sp|P02666|CASB_BOVIN	PPF	360.1918+	1	360.192	PPF	17.01	16.8	17.67	112827736	-0.8	0.9712	TRUE	17.01	16.78	17.7	107849712	-1	0.9792	TRUE	16.91	16.69	17.53	145123936	-0.3	0.9819	TRUE	16.97	16.68	17.53	1578076	1.5	0.9483	ALIGNED	16.95	16.62	17.51	4546364	2.2	0.9541	ALIGNED	16.89	16.65	17.41	2454733	2.6	0.9316	ALIGNED
sp|P02666|CASB_BOVIN	PPFLQPEV	926.4982+	1	926.498	PPFLQPEV	20.51	20.28	20.62	80787776	-1.2	0.9894	TRUE	20.49	20.27	20.6	77888512	-1.1	0.995	TRUE	20.37	20.18	20.47	35606392	-0.6	0.99	TRUE	14.81	14.61	15.19	6254064	2.5	0.9912	TRUE	14.78	14.58	15.19	15628908	3	0.9857	TRUE	14.73	14.55	15.02	37876832	2.3	0.9878	ALIGNED
sp|P02666|CASB_BOVIN	PPFLQPEV	463.7527++	2	463.753	PPFLQPEV																						14.81	14.61	15.19	21779120	2.1	0.9971	TRUE	14.8	14.58	15.19	37040368	2.9	0.9945	TRUE	14.77	14.55	15.02	80374832	1.8	0.9936	ALIGNED
sp|P02666|CASB_BOVIN	PPFLQPEV	464.2447++	2	464.245	PPFLQ[+1]PEV																						15.28	15.14	15.57	2006369	1.6	0.9916	ALIGNED	15.28	15.06	15.61	5328013	1.5	0.9886	ALIGNED	15.07	15.04	15.73	9294382	1.2	0.9629	TRUE
sp|P02666|CASB_BOVIN	PPFLQPE	827.4298+	1	827.43	PPFLQPE	16.33	16.2	16.57	83643400	-1.2	0.9854	TRUE	16.35	16.18	16.53	90609160	-1.4	0.9908	TRUE	16.27	16.12	16.53	109290864	-0.7	0.9958	TRUE	16.22	16.09	16.42	82253	1.1	0.8013	ALIGNED								16.13	16.01	16.32	1530961	-0.8	0.9278	ALIGNED
sp|P02666|CASB_BOVIN	PPFLQPE	414.2185++	2	414.219	PPFLQPE	16.33	16.2	16.57	64600680	-1.6	0.9789	TRUE	16.34	16.18	16.53	68635480	-1.7	0.985	TRUE	16.27	16.12	16.53	81359024	-0.9	0.9926	TRUE	16.22	16.09	16.42	85779	-0.1	0.9093	ALIGNED	16.18	16.09	16.32	284357	-1.4	0.8116	ALIGNED	16.13	16.01	16.32	1253771	-0.5	0.9517	ALIGNED
sp|P02666|CASB_BOVIN	PFL	376.2231+	1	376.223	PFL	12.79	12.55	13.33	1104569600	1	0.9568	ALIGNED	12.72	12.53	13.32	1115435136	0.5	0.9546	ALIGNED	12.73	12.52	13.3	1291746176	0.8	0.9666	ALIGNED	12.73	12.5	13.02	2139011	1.6	0.9564	ALIGNED	12.95	12.88	13.09	1290177	3.6	0.9832	TRUE	12.95	12.86	13.07	438827	2.6	0.9488	ALIGNED
sp|P02666|CASB_BOVIN	LQPEVM	716.3647+	1	716.365	LQPEVM	10.74	10.64	10.88	142834752	-0.1	0.9698	ALIGNED	10.73	10.64	10.86	146885600	-0.3	0.9718	ALIGNED	10.73	10.64	10.82	13916589	0.1	0.9596	ALIGNED	10.73	10.64	10.89	282788	1	0.9454	ALIGNED	10.74	10.62	10.92	3084355	-0.4	0.9728	TRUE	10.73	10.61	10.93	12216256	-1.2	0.9771	ALIGNED
sp|P02666|CASB_BOVIN	PEV	344.1816+	1	344.182	PEV	18.14	17.92	18.4	57617608	-1.4	0.9692	TRUE	18.13	17.92	18.37	75799672	-1.6	0.9759	TRUE	18.05	17.85	18.29	57248944	-1.1	0.9747	TRUE	4.34	4.18	4.52	1167604	-0.7	0.9433	TRUE	4.41	4.28	4.53	6388239	-1.5	0.9732	TRUE	4.42	4.34	4.57	1094102	-1	0.9766	TRUE
sp|P02666|CASB_BOVIN	PEVMG	532.2436+	1	532.244	PEVMG	6.32	6.27	6.44	56879284	-0.3	0.9722	TRUE	6.33	6.26	6.43	42862036	-1.3	0.9448	TRUE	6.36	6.28	6.43	14239982	-1	0.9264	ALIGNED	6.46	6.31	6.51	77775	-3.6	0.935	ALIGNED	6.4	6.32	6.55	1079196	-3.3	0.952	ALIGNED	6.4	6.33	6.6	457344	-0.3	0.8992	ALIGNED
sp|P02666|CASB_BOVIN	PEVM	491.2170+	1	491.217	PEVM[+16]	3.16	2.92	3.3	23020714	-0.3	0.9314	TRUE	3.16	2.92	3.23	18200272	-0.7	0.924	TRUE															3.26	3.12	3.32	297212	-0.9	0.8115	ALIGNED
sp|P02666|CASB_BOVIN	PEVM	475.2221+	1	475.222	PEVM	19.39	19.27	19.63	17406672	0.9	0.9531	TRUE	19.38	19.24	19.61	19046990	0.7	0.9617	TRUE															19.17	19.06	19.35	33293	3.6	0.938	ALIGNED	19.1	18.96	19.28	456858	4.4	0.9167	ALIGNED
sp|P02666|CASB_BOVIN	VMG	306.1482+	1	306.148	VMG	2.46	2.4	2.53	97460576	-0.6	0.9817	TRUE	2.45	2.39	2.52	90089208	-1.2	0.9835	TRUE	2.46	2.4	2.54	48996000	-1.1	0.9282	ALIGNED								2.57	2.49	2.63	1293978	-0.7	0.9754	ALIGNED	2.61	2.57	2.81	830346	-0.3	0.9845	ALIGNED
sp|P02666|CASB_BOVIN	VMGVS	492.2486+	1	492.249	VMGVS	7.3	7.18	7.37	20855654	-1.2	0.9185	ALIGNED	7.28	7.21	7.42	28232408	-2	0.952	ALIGNED	7.29	7.19	7.38	17468616	-1.4	0.9554	ALIGNED	7.31	7.25	7.4	228056	-0.4	0.8279	ALIGNED	7.35	7.27	7.44	3096880	-0.7	0.9335	TRUE	7.35	7.28	7.46	2460710	-1.1	0.9367	TRUE
sp|P02666|CASB_BOVIN	GVSK	390.2347+	1	390.235	GVSK	0.69	0.64	0.74	664363904	-2.3	0.9821	TRUE	0.69	0.64	0.74	220398528	-2.4	0.9826	TRUE
sp|P02666|CASB_BOVIN	GVSKVKEA	409.2425++	2	409.243	GVSKVKEA																																				2.85	2.77	3.03	3087583	-0.6	0.9865	TRUE
sp|P02666|CASB_BOVIN	GVSKVKE	373.7240++	2	373.724	GVSKVKE																																				2.37	2.29	2.51	3771478	-1.8	0.973	TRUE
sp|P02666|CASB_BOVIN	GVSKVKE	249.4851+++	3	249.485	GVSKVKE																																				2.37	2.29	2.51	4939481	0.2	0.9797	TRUE
sp|P02666|CASB_BOVIN	GVSKVKEAM	474.7628++	2	474.763	GVSKVKEAM																																				5.78	5.72	5.91	2220087	-0.8	0.9631	TRUE
sp|P02666|CASB_BOVIN	VSK	333.2132+	1	333.213	VSK	0.69	0.64	0.73	47242524	-1.8	0.9951	TRUE
sp|P02666|CASB_BOVIN	KVKEAM	353.2018++	2	353.202	KVKEAM																						2.98	2.91	3.18	710269	-0.1	0.9523	ALIGNED	3.1	3.01	3.25	2480351	-0.9	0.9361	ALIGNED	3.11	3.02	3.25	56148384	-0.6	0.982	TRUE
sp|P02666|CASB_BOVIN	KVKEAMAPK	334.5319+++	3	334.532	KVKEAMAPK																																				3.26	3.18	3.44	5086560	-0.9	0.8589	TRUE
sp|P02666|CASB_BOVIN	KEA	347.1925+	1	347.193	KEA	0.87	0.82	0.99	385231808	-1.1	0.9708	TRUE	0.85	0.81	0.96	395791488	-1.8	0.9768	TRUE	0.86	0.82	0.93	327912832	-1.3	0.9793	TRUE	1.25	1.11	1.32	88535	-4.4	0.8902	ALIGNED								1.3	1.12	1.43	566990	0.5	0.8861	ALIGNED
sp|P02666|CASB_BOVIN	KEAM	478.2330+	1	478.233	KEAM																																				4.26	4.15	4.39	12311661	-1.9	0.9567	TRUE
sp|P02666|CASB_BOVIN	KEAMAPK	774.4178+	1	774.418	KEAMAPK	2.36	2.29	2.43	16593301	-0.9	0.9737	TRUE	2.36	2.25	2.42	25832668	-1.4	0.9733	TRUE	2.36	2.27	2.43	15372604	-1.3	0.9655	TRUE
sp|P02666|CASB_BOVIN	KEAMAPK	387.7126++	2	387.713	KEAMAPK	2.36	2.29	2.43	78731920	-0.6	0.9523	TRUE	2.36	2.25	2.42	118125696	-1	0.9672	TRUE	2.36	2.27	2.43	80954856	-1	0.9591	TRUE															2.58	2.4	2.67	343056	-1.9	0.868	ALIGNED
sp|P02666|CASB_BOVIN	EAMAPK	646.3229+	1	646.323	EAMAPK	3.35	3.23	3.54	3280229120	-0.4	0.9675	TRUE	3.35	3.24	3.52	3026511616	-0.6	0.9655	TRUE	3.36	3.29	3.52	2221142528	-0.3	0.9646	TRUE								3.51	3.47	3.62	305704	-0.5	0.9621	ALIGNED	3.53	3.46	3.64	1106658	-0.7	0.9583	TRUE
sp|P02666|CASB_BOVIN	EAMAPK	323.6651++	2	323.665	EAMAPK	3.37	3.23	3.54	2775999488	0	0.9409	TRUE	3.33	3.24	3.52	2702168064	-0.3	0.9427	TRUE	3.36	3.29	3.52	2333431808	0	0.9472	TRUE	3.45	3.36	3.54	171799	-1.1	0.9296	ALIGNED	3.53	3.47	3.62	363527	-2	0.9905	ALIGNED	3.53	3.46	3.64	3677905	-1.3	0.9554	TRUE
sp|P02666|CASB_BOVIN	EAMAPK	662.3178+	1	662.318	EAM[+16]APK	1.71	1.3	1.84	477901696	-0.4	0.9665	TRUE	1.7	1.26	1.8	354691488	-0.7	0.9649	TRUE	1.71	1.29	1.82	439035136	-0.6	0.9659	TRUE
sp|P02666|CASB_BOVIN	EAMAPK	331.6625++	2	331.663	EAM[+16]APK	1.71	1.3	1.84	230680768	-0.7	0.9345	TRUE	1.68	1.26	1.8	170462368	-1.2	0.9428	TRUE	1.69	1.29	1.82	163375200	-0.9	0.9349	TRUE															1.85	1.66	1.94	118423	-0.3	0.8105	ALIGNED
sp|P02666|CASB_BOVIN	AMAPK	517.2803+	1	517.28	AMAPK	2.35	2.23	2.44	1405511936	0.8	0.9548	TRUE	2.31	2.22	2.42	1105185792	0.5	0.96	TRUE	2.32	2.25	2.43	886988544	0.7	0.9601	TRUE															2.49	2.42	2.6	2294081	0.4	0.927	TRUE
sp|P02666|CASB_BOVIN	AMAPK	259.1438++	2	259.144	AMAPK	2.3	2.23	2.44	1521382144	-0.6	0.9657	TRUE	2.29	2.22	2.42	1209974912	-0.9	0.9664	TRUE	2.32	2.25	2.43	954756224	-0.8	0.9707	TRUE								2.46	2.4	2.6	696305	-1.6	0.8164	ALIGNED	2.49	2.42	2.6	3548742	-0.5	0.9546	TRUE
sp|P02666|CASB_BOVIN	AMAPK	533.2752+	1	533.275	AM[+16]APK	1.03	0.96	1.09	112245504	-0.7	0.9487	TRUE	1.02	0.96	1.11	66746512	-1.1	0.9336	TRUE	1.02	0.97	1.12	71009008	-0.5	0.9445	TRUE								1.17	1.17	1.3	26457	4.5	0.8224	ALIGNED
sp|P02666|CASB_BOVIN	MAPK	462.2381+	1	462.238	M[+16]APK	0.67	0.63	0.83	230316192	-1.7	0.9613	TRUE	0.66	0.57	0.83	235423056	-2.5	0.9692	TRUE	0.67	0.63	0.84	287980192	-1.8	0.9685	TRUE															1.27	0.94	1.34	2910240	-1.2	0.9629	ALIGNED
sp|P02666|CASB_BOVIN	MAPK	231.6227++	2	231.623	M[+16]APK	0.67	0.63	0.83	57722880	-1	0.9629	TRUE	0.67	0.57	0.83	65577792	-1.9	0.9571	TRUE	0.67	0.63	0.84	85938856	-1.7	0.9539	TRUE															1.27	0.94	1.34	281813	-0.8	0.9564	ALIGNED
sp|P02666|CASB_BOVIN	MAPK	446.2432+	1	446.243	MAPK	1.12	1.06	1.23	3348409344	-1	0.9624	TRUE	1.12	1.05	1.25	3379428608	-1.5	0.9624	TRUE	1.1	1.06	1.26	3230955008	-0.9	0.9636	TRUE															1.26	1.19	1.46	8248364	-0.9	0.9579	TRUE
sp|P02666|CASB_BOVIN	MAPK	223.6252++	2	223.625	MAPK	1.12	1.06	1.23	1082485120	-1.9	0.9583	TRUE	1.11	1.05	1.25	1197472768	-2.2	0.9598	TRUE	1.1	1.06	1.26	1155350400	-1.6	0.9642	TRUE															1.26	1.19	1.46	1679420	1.3	0.8713	TRUE
sp|P02666|CASB_BOVIN	APK	315.2027+	1	315.203	APK	1.11	1.05	1.22	466290464	-1.1	0.9832	TRUE	1.11	1.06	1.24	544427840	-1.7	0.9861	TRUE	2.31	2.25	2.48	269487232	-1.1	0.9843	TRUE															2.49	2.42	2.71	1131361	0.1	0.9555	ALIGNED
sp|P02666|CASB_BOVIN	HKEMP	321.1574++	2	321.157	HKEMP															2.61	2.38	2.97	13666875	0	0.9486	ALIGNED								3.09	3.03	3.27	448542	-1.5	0.8961	ALIGNED	3.09	3.02	3.31	5969025	-1	0.9422	TRUE
sp|P02666|CASB_BOVIN	HKEMPFPK	1013.5237+	1	1013.52	HKEMPFPK	6.95	6.71	7.31	341908960	0	0.9884	TRUE	6.97	6.7	7.31	312788608	-0.5	0.9872	TRUE	6.97	6.73	7.31	212796928	0.1	0.9908	TRUE
sp|P02666|CASB_BOVIN	HKEMPFPK	507.2655++	2	507.265	HKEMPFPK	6.95	6.71	7.31	1647638016	-0.1	0.9895	TRUE	6.97	6.7	7.31	1497363200	-0.4	0.9921	TRUE	6.98	6.73	7.31	1077823232	0	0.9881	TRUE
sp|P02666|CASB_BOVIN	HKEMPFPK	338.5128+++	3	338.513	HKEMPFPK	6.98	6.71	7.31	6406339072	-0.4	0.9948	TRUE	6.97	6.7	7.31	5760255488	-0.8	0.9926	TRUE	6.98	6.73	7.31	4570447872	-0.4	0.9946	TRUE	7.13	6.89	7.25	208376	0.1	0.9657	ALIGNED	7.1	6.89	7.35	770838	-0.3	0.9983	ALIGNED
sp|P02666|CASB_BOVIN	HKEMPFPK	515.2629++	2	515.263	HKEM[+16]PFPK	4.58	4.44	4.8	158428368	0	0.9855	TRUE	4.56	4.43	4.8	113099136	-0.4	0.9719	TRUE	4.62	4.46	4.83	128536680	-0.1	0.9787	TRUE
sp|P02666|CASB_BOVIN	HKEMPFPK	343.8444+++	3	343.844	HKEM[+16]PFPK	4.58	4.44	4.8	691866688	-0.2	0.9764	TRUE	4.56	4.43	4.8	487449408	-0.7	0.9763	TRUE	4.62	4.46	4.83	596074752	-0.3	0.9793	TRUE
sp|P02666|CASB_BOVIN	KEMPFPKY	520.2677++	2	520.268	KEMPFPKY																																				10.82	10.61	11.05	10079416	0.7	0.9787	TRUE
sp|P02666|CASB_BOVIN	KEMPFPKY	347.1809+++	3	347.181	KEMPFPKY																																				10.83	10.61	11.05	21030270	-0.2	0.9768	TRUE
sp|P02666|CASB_BOVIN	KEMPFPK	438.7360++	2	438.736	KEMPFPK	8.01	7.85	8.2	77089080	-0.4	0.9792	TRUE	8.02	7.77	8.16	78400952	-0.6	0.9652	TRUE	8.04	7.86	8.2	88161448	-0.1	0.9636	TRUE	8.13	7.98	8.43	165400	1.1	0.8955	ALIGNED								8.17	8	8.36	1134029	-0.5	0.874	ALIGNED
sp|P02666|CASB_BOVIN	KEMPFPK	292.8264+++	3	292.826	KEMPFPK	8.01	7.85	8.2	53431364	-0.1	0.9666	TRUE	8.01	7.77	8.16	59535084	-0.5	0.9637	TRUE	8.04	7.86	8.2	74764520	-0.1	0.9581	TRUE	8.14	7.98	8.43	186154	-0.7	0.8622	ALIGNED	8.17	8.04	8.38	448134	0.2	0.9096	ALIGNED	8.17	8	8.36	1104720	-0.5	0.95	ALIGNED
sp|P02666|CASB_BOVIN	EMPFPKY	456.2202++	2	456.22	EMPFPKY	12.89	12.62	13	45819160	1.1	0.9541	ALIGNED	12.86	12.64	12.99	52797312	0.8	0.9667	ALIGNED	13.03	12.94	13.14	10844814	2.1	0.9879	ALIGNED	12.99	12.93	13.09	147395	1.9	0.9203	ALIGNED	13.04	12.92	13.13	127398	3.7	0.9438	ALIGNED	12.99	12.84	13.14	94776136	2.2	0.9943	TRUE
sp|P02666|CASB_BOVIN	EMPFPK	748.3698+	1	748.37	EMPFPK	10.16	10.03	10.47	8000214016	-0.9	0.9776	TRUE	10.14	9.99	10.43	8232618496	-1.3	0.9778	TRUE	10.16	10.03	10.47	6550416896	-0.9	0.9759	TRUE								10.39	10.2	10.58	513678	-1.2	0.8998	ALIGNED	10.39	10.22	10.58	896407	-0.2	0.9317	TRUE
sp|P02666|CASB_BOVIN	EMPFPK	374.6885++	2	374.689	EMPFPK	10.16	10.03	10.47	16566564864	-0.6	0.9855	TRUE	10.14	9.99	10.43	17925134336	-1	0.9881	TRUE	10.17	10.03	10.47	14947176448	-0.6	0.987	TRUE	10.37	10.2	10.55	490418	-0.5	0.945	ALIGNED	10.39	10.2	10.58	2801233	-0.6	0.9488	ALIGNED	10.38	10.22	10.58	6496924	-0.6	0.9564	TRUE
sp|P02666|CASB_BOVIN	EMPF	523.2221+	1	523.222	EMPF	13	12.87	13.16	102064416	-0.3	0.9519	TRUE	12.98	12.86	13.13	101105800	-0.9	0.9443	TRUE	12.96	12.84	13.13	99873184	-0.2	0.9505	TRUE															12.97	12.87	13.13	876349	2.4	0.8873	ALIGNED
sp|P02666|CASB_BOVIN	EMPFP	620.2749+	1	620.275	EMPFP	14.39	14.33	14.82	37523916	-0.2	0.9519	TRUE	14.22	14.1	14.89	144289808	-0.9	0.9439	TRUE	14.26	14.06	14.95	380471552	-0.5	0.9527	TRUE	14.2	13.88	14.91	385409	1.8	0.8964	ALIGNED	14.21	14.08	14.76	1345319	2.8	0.88	ALIGNED	14.21	14.02	14.93	46390504	1	0.9472	TRUE
sp|P02666|CASB_BOVIN	EMPFPK	764.3647+	1	764.365	EM[+16]PFPK	7.25	7.06	7.45	551532672	-0.5	0.9912	TRUE	7.24	7.05	7.44	520331712	-1	0.9931	TRUE	7.23	7.06	7.46	512090336	-0.9	0.9792	TRUE
sp|P02666|CASB_BOVIN	EMPFPK	382.6860++	2	382.686	EM[+16]PFPK	7.23	7.06	7.45	1407634944	-0.3	0.9686	TRUE	7.22	7.05	7.44	1279491584	-0.8	0.9686	TRUE	7.2	7.06	7.46	1300060544	-0.8	0.9664	TRUE
sp|P02666|CASB_BOVIN	MPFP	491.2323+	1	491.232	MPFP	13.59	13.28	13.68	2988747	0.5	0.9064	ALIGNED	13.53	13.49	13.55	288346	-2.8	0.9658	ALIGNED	13.51	13.23	14.05	19577814	0.1	0.9265	ALIGNED	13.56	13.34	14.12	2405656	-3.5	0.8228	ALIGNED	13.62	13.32	14.43	6340514	0.8	0.9638	ALIGNED	13.54	13.28	14.3	26057284	0.4	0.9615	TRUE
sp|P02666|CASB_BOVIN	MPFPK	619.3272+	1	619.327	MPFPK	9.42	9.28	9.59	160498000	-0.2	0.9505	TRUE	9.38	9.24	9.49	175937008	-0.5	0.9531	TRUE	9.42	9.28	9.59	147820384	0.5	0.9499	TRUE								9.47	9.33	9.71	661522	-0.2	0.8699	TRUE
sp|P02666|CASB_BOVIN	MPFPK	310.1673++	2	310.167	MPFPK	9.41	9.28	9.59	264242752	-0.5	0.9521	TRUE	9.38	9.24	9.49	281133728	-0.6	0.9536	TRUE	9.39	9.28	9.59	269954848	-0.7	0.9539	TRUE	9.43	9.28	9.65	1524040	0.9	0.9731	ALIGNED	9.48	9.33	9.71	3318507	1.3	0.9756	TRUE	9.47	9.33	9.67	3858638	-0.6	0.964	TRUE
sp|P02666|CASB_BOVIN	MPFPKYP	440.2253++	2	440.225	MPFPKYP																						13.23	13.03	13.81	9369570	2.5	0.9765	TRUE	13.29	13.1	13.81	6606389	2.6	0.9784	ALIGNED	13.23	13.1	13.76	6687602	2.8	0.9648	TRUE
sp|P02666|CASB_BOVIN	MPFPKY	782.3906+	1	782.391	MPFPKY																																				12.34	12.21	12.52	7820922	1	0.9778	TRUE
sp|P02666|CASB_BOVIN	MPFPKY	391.6989++	2	391.699	MPFPKY																						12.35	12.27	12.51	586563	1.2	0.9524	ALIGNED	12.36	12.25	12.48	367729	2.5	0.9293	ALIGNED	12.34	12.21	12.52	119437824	0.4	0.9881	TRUE
sp|P02666|CASB_BOVIN	PFPK	488.2867+	1	488.287	PFPK	10.16	10.02	10.46	6021344768	-0.2	0.9853	TRUE	10.14	10	10.44	6275942400	-0.6	0.9867	TRUE	10.16	10.03	10.47	5590968320	-0.3	0.9875	TRUE	9.41	9.3	9.67	729552	-0.4	0.9176	ALIGNED	9.46	9.34	9.65	1650985	1.4	0.9363	ALIGNED	9.46	9.32	9.6	1823099	0	0.9489	ALIGNED
sp|P02666|CASB_BOVIN	PFPKY	326.1787++	2	326.179	PFPKY																						9.6	9.53	9.91	157014	3.7	0.8535	ALIGNED								9.65	9.55	9.82	10832161	-2.9	0.9804	TRUE
sp|P02666|CASB_BOVIN	FPK	391.2340+	1	391.234	FPK	10.15	10.01	10.45	1048147008	-1.1	0.9825	ALIGNED	3.97	3.9	4.08	14809998	-0.7	0.9564	TRUE	10.15	10.03	10.48	963764672	-1.1	0.9805	TRUE								4.15	4.08	4.27	600260	-1.6	0.8929	ALIGNED	4.16	4.08	4.31	154173	-2.3	0.8833	ALIGNED
sp|P02666|CASB_BOVIN	FPKYPVEP	488.7606++	2	488.761	FPKYPVEP	12.22	12.09	12.32	1355345	-0.3	0.944	ALIGNED	12.23	12.16	12.31	1408667	-3.2	0.8976	ALIGNED								12.19	11.89	12.39	13454286	1.4	0.9926	TRUE	12.2	11.9	12.42	40496672	1	0.9967	TRUE	12.17	11.94	12.38	7904107	0.4	0.9874	ALIGNED
sp|P02666|CASB_BOVIN	FPKYPVEPF	562.2948++	2	562.295	FPKYPVEPF								15.65	15.53	15.79	1448293	-3	0.8335	ALIGNED								15.67	15.55	15.89	10569373	1	0.9955	TRUE	15.68	15.53	15.91	18568696	1.3	0.9931	TRUE	15.62	15.51	15.84	9690038	1.7	0.9897	ALIGNED
sp|P02666|CASB_BOVIN	FPKYP	326.1787++	2	326.179	FPKYP	10.05	9.91	10.15	2119259	0.7	0.9871	ALIGNED	10.03	10	10.1	488808	-0.4	0.8156	ALIGNED								10.06	9.88	10.53	10396499	1	0.9772	TRUE	10.11	9.95	10.57	30918942	0.5	0.9898	TRUE	10.08	9.94	10.53	8600908	1.1	0.976	TRUE
sp|P02666|CASB_BOVIN	PKYPVEPF	488.7606++	2	488.761	PKYPVEPF	13.24	12.98	13.42	101578352	0.8	0.9584	TRUE	13.24	13.15	13.38	81557616	-0.6	0.9892	TRUE	13.21	12.92	13.34	84392192	1.9	0.9472	ALIGNED	13.16	13.03	13.28	234316	0.6	0.9132	ALIGNED	13.17	13.05	13.32	1154872	1.1	0.955	ALIGNED	13.13	13	13.33	324337	0.6	0.9233	ALIGNED
sp|P02666|CASB_BOVIN	KYP	407.2289+	1	407.229	KYP																						3.3	3.22	3.44	230064	-1.7	0.8747	ALIGNED	3.41	3.32	3.51	2122488	-1.4	0.9182	TRUE	3.42	3.31	3.53	1493471	-1.2	0.9601	ALIGNED
sp|P02666|CASB_BOVIN	KYPVEPF	440.2342++	2	440.234	KYPVEPF	12.69	12.45	12.93	37336472	1.3	0.9691	ALIGNED	12.67	12.5	12.95	33879308	0.7	0.9643	ALIGNED	12.65	12.47	12.87	25132618	1.4	0.982	TRUE								12.63	12.47	12.87	1583608	1.6	0.9768	ALIGNED	12.64	12.46	12.9	2305855	-0.4	0.9921	ALIGNED
sp|P02666|CASB_BOVIN	YPV	378.2023+	1	378.202	YPV	7.36	7.27	7.46	38556696	-0.3	0.9685	ALIGNED	7.36	7.28	7.5	24055276	-1.5	0.9729	ALIGNED	7.35	7.28	7.49	38075464	-1.3	0.9598	ALIGNED	7.37	7.28	7.5	5137478	-0.5	0.9781	ALIGNED	7.41	7.32	7.55	6343490	-0.8	0.963	TRUE	7.42	7.34	7.55	1236642	-1.4	0.9318	ALIGNED
sp|P02666|CASB_BOVIN	YPVEPF	751.3661+	1	751.366	YPVEPF	14.25	14.08	14.6	30259748864	-1.4	0.9959	TRUE	14.23	14.06	14.61	33223354368	-1.7	0.9964	TRUE	14.16	14.03	14.58	22560094208	-1	0.9957	TRUE	14.26	14.06	14.6	20415150	2.2	0.9895	TRUE	14.26	14.06	14.6	77663360	3.2	0.9928	TRUE	14.21	14.03	14.49	19519264	1.7	0.9938	TRUE
sp|P02666|CASB_BOVIN	YPVEPF	376.1867++	2	376.187	YPVEPF	14.25	14.08	14.6	4507185664	-1.4	0.9917	TRUE	14.24	14.06	14.61	4696669184	-1.8	0.9938	TRUE	14.19	14.03	14.58	3718579968	-1.1	0.9914	TRUE	14.26	14.06	14.6	9280578	1.9	0.9863	TRUE	14.26	14.06	14.6	29956870	2.4	0.9909	TRUE	14.19	14.03	14.49	7278836	1.4	0.9884	TRUE
sp|P02666|CASB_BOVIN	YPVEP	604.2977+	1	604.298	YPVEP	9.05	8.8	9.19	565890880	-0.5	0.9939	TRUE	9.04	8.81	9.18	594147712	-0.7	0.9951	TRUE	9.06	8.82	9.2	1741635072	-0.2	0.9955	TRUE	9.09	8.83	9.25	21204970	1.5	0.9918	TRUE	9.09	8.87	9.24	74837432	0.9	0.9928	TRUE	9.07	8.84	9.23	109969592	-0.4	0.9944	TRUE
sp|P02666|CASB_BOVIN	YPVEP	302.6525++	2	302.652	YPVEP	9.05	8.8	9.19	32064702	-0.9	0.9629	TRUE	9.04	8.81	9.18	31923692	-1.1	0.9865	TRUE	9.06	8.82	9.2	107634864	-0.3	0.9905	TRUE	9.09	8.83	9.25	3216383	0.9	0.9769	TRUE	9.09	8.87	9.24	7971246	0.2	0.9856	TRUE	9.07	8.84	9.23	11838641	-0.9	0.9883	TRUE
sp|P02666|CASB_BOVIN	YPVE	507.2449+	1	507.245	YPVE	6.69	6.61	6.85	1186464000	0.7	0.9917	TRUE	6.69	6.59	6.83	940217856	0.3	0.9877	TRUE	6.73	6.62	6.86	792433024	-0.2	0.9919	TRUE								6.74	6.58	6.9	4956939	-2.1	0.9525	ALIGNED	6.98	6.89	7.1	172502	-0.7	0.9815	ALIGNED
sp|P02666|CASB_BOVIN	YPVEPFT	852.4138+	1	852.414	YPVEPFT	13.65	13.51	13.84	84313984	1.1	0.993	TRUE	13.63	13.5	13.83	85101096	0.1	0.9925	ALIGNED	13.59	13.45	13.78	87648128	0.8	0.9946	TRUE	13.58	13.47	13.65	95529	2.4	0.9268	ALIGNED	13.55	13.43	13.67	437690	2.5	0.872	ALIGNED
sp|P02666|CASB_BOVIN	PVEPFTESQS	560.7615++	2	560.761	PVEPFTESQS																																				10.5	10.41	10.63	22441612	-0.6	0.9962	TRUE
sp|P02666|CASB_BOVIN	PVEPFTE	818.3931+	1	818.393	PVEPFTE																																				11.35	11.26	11.48	114745536	-1.3	0.9955	TRUE
sp|P02666|CASB_BOVIN	PVEPFTE	409.7002++	2	409.7	PVEPFTE																																				11.35	11.26	11.48	31856314	-1.2	0.9953	TRUE
sp|P02666|CASB_BOVIN	PVEPF	588.3028+	1	588.303	PVEPF	11.97	11.85	12.18	9965696000	-0.4	0.9939	TRUE	11.97	11.85	12.17	10096111616	-0.7	0.9955	TRUE	11.95	11.83	12.16	9052078080	-0.3	0.9946	TRUE	11.98	11.85	12.14	6790641	0.4	0.9866	TRUE	11.99	11.88	12.17	52461956	-0.3	0.9889	TRUE	12.01	11.85	12.15	1857632768	-1.1	0.9944	TRUE
sp|P02666|CASB_BOVIN	PVEPF	294.6550++	2	294.655	PVEPF	11.97	11.85	12.18	433052416	-0.7	0.9873	TRUE	11.97	11.85	12.17	398402176	-1	0.9883	TRUE	11.95	11.83	12.16	387306976	-0.6	0.9875	TRUE	11.98	11.85	12.14	456240	0.6	0.9547	TRUE	12.01	11.88	12.17	2400064	-0.1	0.9444	TRUE	11.98	11.85	12.15	95229872	-1.5	0.9868	TRUE
sp|P02666|CASB_BOVIN	PVEPFTESQ	517.2455++	2	517.245	PVEPFTESQ																						10.68	10.61	10.75	21375	0.9	0.8827	ALIGNED								10.64	10.56	10.77	40204272	1.4	0.9918	TRUE
sp|P02666|CASB_BOVIN	PVEPFTES	905.4251+	1	905.425	PVEPFTES																																				10.98	10.87	11.11	27320770	-1.9	0.9849	TRUE
sp|P02666|CASB_BOVIN	PVEPFTES	453.2162++	2	453.216	PVEPFTES																																				10.96	10.87	11.11	18422458	-2.1	0.9838	TRUE
sp|P02666|CASB_BOVIN	PVEPFTESQSL	617.3035++	2	617.304	PVEPFTESQSL																																				14.07	14	14.2	15124070	1.5	0.9925	TRUE
sp|P02666|CASB_BOVIN	PVEP	441.2344+	1	441.234	PVEP	5.26	5.02	5.36	98488744	-0.9	0.9702	TRUE	5.24	5.03	5.34	86762120	-1.3	0.9669	ALIGNED	5.26	5.05	5.38	423549120	-0.9	0.9827	ALIGNED	5.27	5.09	5.38	4904926	0	0.9801	ALIGNED	5.33	5.15	5.44	30553064	-0.9	0.9822	ALIGNED	5.44	5.44	5.53	793891	1.3	0.9671	TRUE
sp|P02666|CASB_BOVIN	PVEPFT	689.3505+	1	689.35	PVEPFT	11.32	11.22	11.42	54767104	-1.2	0.817	ALIGNED								11.28	11.2	11.43	44149636	-1.2	0.9612	ALIGNED															11.28	11.18	11.43	27122318	-0.9	0.9901	TRUE
sp|P02666|CASB_BOVIN	PVEPFT	345.1789++	2	345.179	PVEPFT								11.3	11.22	11.43	5334777	-2.3	0.9015	ALIGNED	11.28	11.2	11.43	7784183	-1.7	0.9262	ALIGNED								11.3	11.16	11.76	53218	-0.3	0.8473	ALIGNED	11.28	11.18	11.43	7621218	-0.7	0.9878	TRUE
sp|P02666|CASB_BOVIN	VEPF	491.2500+	1	491.25	VEPF	10.74	10.51	10.92	1155274496	0.1	0.9834	TRUE	10.68	10.49	10.9	1136350208	-0.1	0.983	ALIGNED	10.72	10.51	10.92	1021870848	-0.4	0.9819	TRUE	10.81	10.64	10.92	4279306	1	0.9503	ALIGNED	10.84	10.65	11.09	32766810	1.3	0.9784	ALIGNED	10.82	10.63	11.03	17853364	0.8	0.9796	ALIGNED
sp|P02666|CASB_BOVIN	PFT	364.1867+	1	364.187	PFT	5.67	5.6	5.78	13407039	1.7	0.9388	TRUE	5.66	5.57	5.76	10946936	1.6	0.9546	TRUE	5.68	5.62	5.81	21732558	1.9	0.9568	TRUE								5.77	5.62	5.84	444910	-0.1	0.8919	ALIGNED	5.77	5.69	5.86	165675	-1.2	0.8843	ALIGNED
sp|P02666|CASB_BOVIN	PFTES	580.2613+	1	580.261	PFTES	5.9	5.83	6.01	87355208	-0.6	0.9803	TRUE	5.89	5.82	6.02	64932200	-0.8	0.9852	TRUE	5.91	5.84	6.02	208921456	-0.7	0.9855	TRUE
sp|P02666|CASB_BOVIN	PFTESQS	795.3519+	1	795.352	PFTESQS	5.83	5.76	5.93	112211880	-0.1	0.9888	TRUE	5.83	5.76	5.93	92225336	-0.6	0.9906	TRUE	5.84	5.77	5.94	50331640	0.5	0.9851	TRUE
sp|P02666|CASB_BOVIN	PFTESQS	398.1796++	2	398.18	PFTESQS	5.84	5.76	5.93	59742292	-0.3	0.9899	TRUE	5.83	5.76	5.93	44590728	-0.6	0.9833	TRUE	5.84	5.77	5.94	30795452	-0.1	0.9842	TRUE
sp|P02666|CASB_BOVIN	FTESQ	611.2671+	1	611.267	FTESQ	3.99	3.89	4.09	27271038	-0.5	0.9836	TRUE	3.98	3.87	4.08	34167324	-0.7	0.9845	TRUE	4.01	3.92	4.1	19144780	-1.3	0.9759	ALIGNED								4.09	4.04	4.17	976277	-1.3	0.9853	ALIGNED
sp|P02666|CASB_BOVIN	TESQ	464.1987+	1	464.199	TESQ	0.62	0.56	0.72	1412416256	-1.9	0.9905	ALIGNED	0.61	0.57	0.71	1647404032	-1.9	0.989	ALIGNED	0.6	0.57	0.72	1348118400	-1.6	0.9863	TRUE								0.84	0.81	0.89	549038	2.5	0.8163	ALIGNED
sp|P02666|CASB_BOVIN	TLTDVEN	791.3781+	1	791.378	TLTDVEN	7.06	6.99	7.17	190029216	-0.6	0.9882	TRUE	7.06	6.98	7.16	204692416	-0.9	0.9893	TRUE	7.06	6.99	7.16	474461056	-0.7	0.9929	TRUE								7.1	7.04	7.24	325730	-1.2	0.9536	ALIGNED	7.11	7.03	7.21	7503501	-0.7	0.9886	TRUE
sp|P02666|CASB_BOVIN	TLTDVEN	396.1927++	2	396.193	TLTDVEN	7.06	6.99	7.17	56103884	-0.4	0.9971	TRUE	7.05	6.98	7.16	61123376	-0.8	0.9866	TRUE	7.06	6.99	7.16	135609504	-0.7	0.9842	TRUE								7.09	7.04	7.24	151633	-1.1	0.922	ALIGNED	7.11	7.03	7.21	4671848	-1	0.9954	TRUE
sp|P02666|CASB_BOVIN	TLTDVENLH	521.2642++	2	521.264	TLTDVENLH	10.22	10.15	10.33	21691084	-1	0.9402	TRUE	10.2	10.13	10.31	25817004	-0.8	0.9455	TRUE	10.18	10.14	10.29	10774679	-1.3	0.9159	ALIGNED
sp|P02666|CASB_BOVIN	TLTDVENL	904.4622+	1	904.462	TLTDVENL	13.06	12.99	13.18	1052328320	-0.3	0.9958	TRUE	13.06	12.98	13.16	1310505088	-0.7	0.996	TRUE	13.01	12.91	13.14	257693904	0.2	0.9925	TRUE								12.99	12.89	13.06	102867	4.9	0.8093	ALIGNED	12.96	12.87	13.09	3495115	2.9	0.9931	ALIGNED
sp|P02666|CASB_BOVIN	TLTDVENL	452.7347++	2	452.735	TLTDVENL	13.06	12.99	13.18	1064262080	-0.1	0.9957	TRUE	13.05	12.98	13.16	1238029312	-0.5	0.9952	TRUE	13.01	12.91	13.14	291316224	0.2	0.9949	TRUE	12.94	12.94	13.05	26110	-3.1	0.8422	ALIGNED	12.98	12.89	13.06	289298	2.5	0.9597	ALIGNED	12.96	12.87	13.09	7032952	3.8	0.9899	ALIGNED
sp|P02666|CASB_BOVIN	TLTDVE	677.3352+	1	677.335	TLTDVE	7.88	7.81	8	1687560064	-0.6	0.9954	TRUE	7.88	7.81	7.99	1499667712	-1	0.9955	TRUE	7.88	7.8	7.99	1157986688	-0.3	0.9932	ALIGNED	7.9	7.84	7.95	65662	-0.4	0.8344	ALIGNED	7.92	7.84	8	558244	0.4	0.9484	ALIGNED	7.9	7.83	8.02	78487536	-1.6	0.9914	TRUE
sp|P02666|CASB_BOVIN	TLTDVE	339.1712++	2	339.171	TLTDVE	7.88	7.81	8	201645824	-0.6	0.9857	TRUE	7.88	7.81	7.99	175640160	-0.9	0.9923	TRUE	7.88	7.8	7.99	147971872	-0.3	0.9933	ALIGNED															7.9	7.83	8.02	15092469	-1.3	0.9911	TRUE
sp|P02666|CASB_BOVIN	LTDVENL	803.4145+	1	803.415	LTDVENL	11.77	11.68	11.88	889350336	-0.8	0.9855	TRUE	11.74	11.67	11.87	815341696	-1.2	0.9839	TRUE	11.72	11.65	11.84	159713424	0.6	0.9559	ALIGNED								11.71	11.63	12	132956	0.2	0.8236	ALIGNED	11.7	11.61	11.81	8162085	0	0.9793	TRUE
sp|P02666|CASB_BOVIN	LTDVENL	402.2109++	2	402.211	LTDVENL	11.75	11.68	11.88	523683968	-0.7	0.9905	TRUE	11.76	11.67	11.87	500375936	-1.1	0.9916	TRUE	11.72	11.65	11.84	159188592	0.2	0.9872	ALIGNED								11.72	11.63	12	495299	2.3	0.8827	ALIGNED	11.7	11.61	11.81	11198287	-0.1	0.9845	TRUE
sp|P02666|CASB_BOVIN	LTDVENLHLPLPL	737.4192++	2	737.419	LTDVENLHLPLPL	20.82	20.59	21.14	26770072	0.8	0.9852	TRUE	20.79	20.58	21.11	23267046	0.5	0.9827	TRUE	20.67	20.61	20.92	2415763	1.4	0.9834	ALIGNED
sp|P02666|CASB_BOVIN	LTDVE	576.2875+	1	576.288	LTDVE	6.04	5.97	6.16	643486272	0	0.9914	TRUE	6.03	5.96	6.2	564999168	-0.5	0.9874	TRUE	6.06	5.94	6.21	474255776	-0.4	0.9839	ALIGNED	6.04	5.98	6.17	277737	0.8	0.9478	ALIGNED	6.11	6.02	6.3	1690644	0	0.9407	ALIGNED	6.11	6.04	6.21	127358640	-0.7	0.9929	TRUE
sp|P02666|CASB_BOVIN	LTDVENLH	470.7404++	2	470.74	LTDVENLH	8.7	8.66	8.83	19865524	0.6	0.9769	ALIGNED	8.69	8.63	8.82	20520578	0.6	0.9651	TRUE																						8.74	8.63	8.8	1769797	-1.2	0.9497	ALIGNED
sp|P02666|CASB_BOVIN	LTDVEN	690.3305+	1	690.33	LTDVEN	5.28	5.21	5.38	121966208	-1	0.9951	TRUE	5.28	5.2	5.37	113027704	-1.3	0.9925	TRUE	5.28	5.21	5.38	255694352	-0.8	0.9943	TRUE								5.4	5.28	5.5	945280	-1	0.813	ALIGNED
sp|P02666|CASB_BOVIN	LTDVEN	345.6689++	2	345.669	LTDVEN	5.28	5.21	5.38	24917804	0	0.9771	TRUE	5.27	5.2	5.37	20914300	0.1	0.9611	TRUE	5.28	5.21	5.38	51285004	-0.4	0.9815	TRUE								5.33	5.28	5.5	261837	-0.8	0.8439	ALIGNED	5.42	5.42	5.47	34768	-0.9	0.8274	ALIGNED
sp|P02666|CASB_BOVIN	TDVEN	577.2464+	1	577.246	TDVEN	1.7	1.63	1.82	418310048	-0.4	0.9925	ALIGNED	1.69	1.62	1.8	443136544	-0.8	0.9938	ALIGNED	1.71	1.61	1.82	1159962752	-0.6	0.9937	ALIGNED	1.73	1.64	1.84	173954	1.1	0.9394	ALIGNED	1.86	1.86	1.97	1794	-0.5	0.9037	ALIGNED	1.79	1.7	1.92	18025164	0.5	0.9895	TRUE
sp|P02666|CASB_BOVIN	TDVENLH	414.1983++	2	414.198	TDVENLH	6.24	6.19	6.34	116238400	-0.7	0.9889	TRUE	6.25	6.18	6.33	120226256	-1	0.9857	TRUE	6.26	6.19	6.36	71222664	-0.7	0.9886	TRUE								6.31	6.23	6.4	405860	1	0.9307	ALIGNED	6.29	6.22	6.41	1727194	-0.1	0.9891	ALIGNED
sp|P02666|CASB_BOVIN	TDVE	463.2035+	1	463.203	TDVE	2.27	2.2	2.34	434839712	-0.7	0.9881	TRUE	2.26	2.18	2.33	449412768	-1	0.9867	TRUE	2.29	2.22	2.36	421332736	-0.9	0.9884	TRUE	2.33	2.27	2.54	2076724	-0.9	0.8812	ALIGNED	2.38	2.32	2.46	19252566	-1.9	0.9833	ALIGNED	2.4	2.33	2.51	57890992	-2	0.9872	TRUE
sp|P02666|CASB_BOVIN	TDVENLHLPLPL	680.8772++	2	680.877	TDVENLHLPLPL	19.8	19.53	20.14	358664736	2.2	0.9988	TRUE	19.78	19.51	20.23	315737632	1.4	0.9965	TRUE	19.65	19.38	19.86	33628356	3.3	0.9901	TRUE															19.51	19.38	19.65	134673	3.6	0.8393	ALIGNED
sp|P02666|CASB_BOVIN	TDVENLHLPLPL	454.2539+++	3	454.254	TDVENLHLPLPL	19.77	19.53	20.14	41480232	2.2	0.9922	TRUE	19.77	19.51	20.23	35754012	1.5	0.9982	TRUE	19.67	19.38	19.86	3571899	2.7	0.9622	TRUE
sp|P02666|CASB_BOVIN	DVENLHLPLPL	1259.6994+	1	1259.7	DVENLHLPLPL	20.12	19.88	20.52	37453896	0.9	0.994	TRUE	20.06	19.84	20.53	36581224	0.4	0.9904	TRUE	19.98	19.75	20.49	3559534	2.4	0.9762	TRUE
sp|P02666|CASB_BOVIN	DVENLHLPLPL	630.3533++	2	630.353	DVENLHLPLPL	20.12	19.88	20.52	1439839488	0.2	0.9969	TRUE	20.1	19.84	20.53	1390720640	-0.2	0.9968	TRUE	19.95	19.75	20.49	292655680	1.7	0.9956	TRUE															19.84	19.62	20.05	1061997	3.8	0.9937	ALIGNED
sp|P02666|CASB_BOVIN	DVENLHLPLPL	420.5713+++	3	420.571	DVENLHLPLPL	20.13	19.88	20.52	46644668	0.3	0.9981	TRUE	20.1	19.84	20.53	43969516	-0.1	0.9902	TRUE	19.95	19.75	20.49	10331620	1.7	0.9885	TRUE
sp|P02666|CASB_BOVIN	DVEN	476.1987+	1	476.199	DVEN								1.05	1.01	1.13	114048760	-1.1	0.9761	ALIGNED	1.06	1.01	1.13	294661344	-0.8	0.9824	TRUE
sp|P02666|CASB_BOVIN	DVENLH	726.3417+	1	726.342	DVENLH	5.57	5.51	5.7	12615398	-2.7	0.988	TRUE	5.56	5.51	5.66	14777112	-3.4	0.9831	TRUE	5.58	5.52	5.67	9543015	-3.5	0.9781	TRUE
sp|P02666|CASB_BOVIN	DVENLH	363.6745++	2	363.674	DVENLH	5.57	5.51	5.7	43321836	-0.4	0.9744	TRUE	5.58	5.51	5.66	49018388	-1	0.9813	TRUE	5.58	5.52	5.67	33841716	-0.8	0.9779	TRUE								5.62	5.58	5.71	385734	-0.8	0.9489	ALIGNED
sp|P02666|CASB_BOVIN	VENLHLPLPL	1144.6725+	1	1144.67	VENLHLPLPL	19.21	18.95	19.49	48363000	0.3	0.9869	TRUE	19.17	18.91	19.47	44243924	0.5	0.9901	TRUE	19.04	18.81	19.38	10105297	0.8	0.9801	TRUE
sp|P02666|CASB_BOVIN	VENLHLPLPL	572.8399++	2	572.84	VENLHLPLPL	19.21	18.95	19.49	1365075968	0.4	0.9948	TRUE	19.17	18.91	19.47	1308218624	0.4	0.9967	TRUE	19.08	18.81	19.38	385698816	0.2	0.9993	TRUE															18.91	18.77	19.2	402302	3.6	0.9701	ALIGNED
sp|P02666|CASB_BOVIN	VENLHLPLPL	382.2290+++	3	382.229	VENLHLPLPL	19.23	18.95	19.49	13532785	0.4	0.9862	TRUE	19.24	18.91	19.47	12273904	0.6	0.9834	TRUE	19.1	18.81	19.38	3755446	1.2	0.969	TRUE
sp|P02666|CASB_BOVIN	VENLHLPLP	516.2978++	2	516.298	VENLHLPLP	16.43	16.4	16.69	18343832	-0.5	0.993	TRUE								16.25	16.04	16.6	36990432	4.6	0.9784	TRUE															16.27	15.85	16.5	1443600	1.9	0.9841	ALIGNED
sp|P02666|CASB_BOVIN	ENLHLPLPL	523.3057++	2	523.306	ENLHLPLPL	18.87	18.5	19.08	68788152	0.2	0.9543	TRUE	18.84	18.5	19.11	67845016	-0.2	0.9589	TRUE	18.78	18.56	19.02	28796632	0.9	0.9023	TRUE															18.62	18.42	18.71	448030	3	0.9921	ALIGNED
sp|P02666|CASB_BOVIN	ENLH	512.2463+	1	512.246	ENLH	5.57	5.5	5.74	20663584	-0.2	0.9222	ALIGNED	5.58	5.45	5.65	21572670	-0.3	0.9592	TRUE	5.57	5.47	5.67	14368245	-0.2	0.9501	ALIGNED
sp|P02666|CASB_BOVIN	NLHLPLPL	916.5615+	1	916.561	NLHLPLPL	19.02	18.77	19.35	146218368	-2.2	0.9897	TRUE	19.02	18.76	19.34	161003536	-2.4	0.99	TRUE	18.93	18.69	19.24	89043136	-2.5	0.9872	TRUE
sp|P02666|CASB_BOVIN	NLHLPLPL	458.7844++	2	458.784	NLHLPLPL	19.01	18.77	19.35	1657639296	-1.2	0.9921	TRUE	19	18.76	19.34	1741431936	-1.3	0.9933	TRUE	18.92	18.69	19.24	1023204480	-0.7	0.9908	TRUE								18.84	18.45	18.93	273913	0.4	0.8924	ALIGNED	18.74	18.53	19.03	11526172	-1.5	0.9923	TRUE
sp|P02666|CASB_BOVIN	NLHLPLP	402.2423++	2	402.242	NLHLPLP	16.12	15.58	16.4	40716068	0.4	0.9811	ALIGNED	16.07	15.57	16.45	43092484	0	0.987	ALIGNED	16.04	15.41	16.44	150335072	1.1	0.9901	TRUE								16.02	15.77	16.15	321771	2.9	0.9736	ALIGNED	15.94	15.38	16.36	16003959	1.1	0.9877	ALIGNED
sp|P02666|CASB_BOVIN	NLHLPLPL	459.2764++	2	459.276	N[+1]LHLPLPL	19.95	19.65	20.2	7578047	1.4	0.9357	TRUE	19.94	19.64	20.19	6304384	1	0.9009	TRUE	20.32	20.11	20.58	14153896	-0.7	0.9615	TRUE
sp|P02666|CASB_BOVIN	NLHLPLPLLQ	579.3557++	2	579.356	NLHLPLPLLQ																																				19.95	19.69	20.16	10841902	3.6	0.9905	TRUE
sp|P02666|CASB_BOVIN	NLHLPLPLL	515.3264++	2	515.326	NLHLPLPLL	21	20.6	21.11	11799085	2.9	0.9781	TRUE	20.94	20.61	21.09	10198346	2.5	0.9828	ALIGNED															20.89	20.89	21.23	101911	-1.3	0.8597	ALIGNED	20.96	20.78	21.21	18914836	2.9	0.9902	TRUE
sp|P02666|CASB_BOVIN	LHLPLP	689.4345+	1	689.434	LHLPLP	15.55	15.54	16.02	856051712	0	0.9902	TRUE	15.22	14.81	15.72	20340197376	-1.7	0.9933	ALIGNED																						15.3	15.01	15.52	2916597	2.9	0.8985	TRUE
sp|P02666|CASB_BOVIN	LHLPLP	345.2209++	2	345.221	LHLPLP								15.24	14.81	15.72	42726420480	-1.3	0.9941	ALIGNED
sp|P02666|CASB_BOVIN	LHLPLPLLQ	522.3342++	2	522.334	LHLPLPLLQ															19.76	19.75	19.87	44865	1.1	0.8218	ALIGNED								19.71	19.45	19.94	78594	2.4	0.9452	ALIGNED	19.65	19.31	19.89	10633527	3.8	0.9933	TRUE
sp|P02666|CASB_BOVIN	LHLPLPLL	458.3049++	2	458.305	LHLPLPLL	20.49	20.05	20.7	61088992	-1	0.9951	TRUE	20.43	19.97	20.7	62448340	-1.1	0.9729	TRUE	20.41	19.98	20.6	23247790	-0.4	0.9901	TRUE															20.72	20.51	20.98	13134056	2.8	0.9934	TRUE
sp|P02666|CASB_BOVIN	LHLPLPL	802.5185+	1	802.519	LHLPLPL	18.74	18.48	19.06	185776192	0	0.9878	TRUE	18.74	18.48	19.04	204057856	-0.4	0.9905	TRUE	18.63	18.12	18.95	107550352	0.2	0.986	TRUE															18.41	18.35	18.61	151843	2.6	0.8421	TRUE
sp|P02666|CASB_BOVIN	LHLPLPL	401.7629++	2	401.763	LHLPLPL	18.72	18.48	19.06	1326531584	0	0.9942	TRUE	18.74	18.48	19.04	1424786688	-0.3	0.9935	TRUE	18.65	18.12	18.95	927512576	0.3	0.9927	TRUE	18.18	18.04	18.29	75274	2.1	0.8999	ALIGNED								18.42	18.35	18.61	3405924	3.8	0.982	TRUE
sp|P02666|CASB_BOVIN	HLPLPLL	802.5185+	1	802.519	HLPLPLL	18.39	18.13	18.47	71929912	-1.2	0.99	TRUE	18.36	18.13	18.47	93167584	-1.5	0.9916	TRUE	18.64	18.13	18.96	107695880	0.2	0.9859	ALIGNED															18.13	17.93	18.33	4740832	1.4	0.9794	TRUE
sp|P02666|CASB_BOVIN	HLPLPLL	401.7629++	2	401.763	HLPLPLL	18.37	18.13	18.47	218764496	-1.1	0.9927	TRUE	18.37	18.13	18.47	263934640	-1.3	0.9883	TRUE	18.64	18.13	18.96	938350720	0.3	0.9926	ALIGNED	18.18	18.04	18.29	75280	2.1	0.8999	ALIGNED	18.16	17.98	18.18	130212	0.3	0.9735	ALIGNED	18.15	17.93	18.33	46249724	0.9	0.9901	TRUE
sp|P02666|CASB_BOVIN	HLPLPLLQS	509.3082++	2	509.308	HLPLPLLQS	16.82	16.56	17.02	16917302	1.3	0.9823	ALIGNED	16.8	16.61	16.99	13969296	0.8	0.9845	TRUE	16.74	16.38	16.91	8948423	1.3	0.9551	ALIGNED								16.7	16.52	16.84	278643	4.6	0.9438	ALIGNED	16.63	16.39	16.81	1362329	1.1	0.9918	ALIGNED
sp|P02666|CASB_BOVIN	HLPL	479.2976+	1	479.298	HLPL	9.42	9.18	9.68	460161120	-0.3	0.9715	TRUE	9.4	9.14	9.66	498027520	-0.7	0.972	TRUE	9.5	9.25	9.71	610005440	-0.5	0.9806	TRUE															9.64	9.41	9.83	9184417	-1.3	0.9566	TRUE
sp|P02666|CASB_BOVIN	HLPLPL	689.4345+	1	689.434	HLPLPL	15.26	14.86	15.74	19938555904	-1.1	0.9925	TRUE	15.22	14.81	15.73	20378187776	-1.7	0.9933	TRUE	15.2	14.85	15.7	14768174080	-0.7	0.9922	TRUE	15.18	14.85	15.22	279616	-1.6	0.8158	ALIGNED								15.3	14.97	15.35	2149102	2.1	0.9183	TRUE
sp|P02666|CASB_BOVIN	HLPLPL	345.2209++	2	345.221	HLPLPL	15.26	14.86	15.74	40701546496	-0.7	0.9928	TRUE	15.25	14.81	15.73	42757980160	-1.3	0.9941	TRUE	15.22	14.85	15.7	33527758848	-0.4	0.9934	TRUE
sp|P02666|CASB_BOVIN	HLPLP	576.3504+	1	576.35	HLPLP	11.64	11.02	12.09	915134784	-0.4	0.9832	TRUE	11.61	11.04	12.03	905004288	-0.8	0.9844	TRUE	11.61	10.97	12.07	2990291200	-0.4	0.9865	TRUE															11.55	11.12	12.08	26409302	-0.3	0.9896	TRUE
sp|P02666|CASB_BOVIN	HLPLP	288.6788++	2	288.679	HLPLP	11.61	11.02	12.09	634608832	-0.7	0.9809	TRUE	11.61	11.04	12.03	646872896	-1	0.9787	TRUE															11.72	11.33	11.94	1051824	-0.7	0.8561	ALIGNED	11.61	11.12	12.08	42534812	-0.9	0.9809	TRUE
sp|P02666|CASB_BOVIN	HLPLPLLQ	465.7922++	2	465.792	HLPLPLLQ	16.94	16.66	17.12	6627214	0.5	0.9467	ALIGNED	17.25	17.09	17.42	9117745	0.8	0.9701	ALIGNED	17.14	17.04	17.32	5519843	1.5	0.9803	ALIGNED	17.09	16.98	17.22	129361	1.7	0.9238	ALIGNED	17.07	16.9	17.25	537273	3.4	0.9525	ALIGNED	17.03	16.73	17.29	24896284	3.3	0.9946	TRUE
sp|P02666|CASB_BOVIN	HLP	366.2136+	1	366.214	HLP	3.29	2.77	3.39	1560600576	-0.3	0.9774	ALIGNED	3.27	2.84	3.37	1494755328	-0.8	0.9771	TRUE	3.27	2.63	3.42	4066586880	-0.5	0.9796	TRUE	3.44	3.06	3.59	6486495	-0.5	0.9798	ALIGNED	3.45	3.29	3.61	22090342	-1.2	0.98	ALIGNED	3.45	3.04	3.65	8916842	-1.1	0.9692	ALIGNED
sp|P02666|CASB_BOVIN	LPLPLLQ	793.5182+	1	793.518	LPLPLLQ																						18.73	18.62	18.86	317396	4	0.9014	ALIGNED	18.7	18.59	18.83	785773	4.1	0.9453	TRUE	18.65	18.51	18.82	24626260	-1.8	0.9877	TRUE
sp|P02666|CASB_BOVIN	LPLPLLQ	397.2627++	2	397.263	LPLPLLQ																						18.75	18.62	18.86	600343	1.8	0.9529	ALIGNED	18.72	18.59	18.83	1142130	2.2	0.9836	TRUE	18.65	18.51	18.82	25109190	-1.5	0.9868	TRUE
sp|P02666|CASB_BOVIN	LPLPL	552.3756+	1	552.376	LPLPL	17.34	17.14	17.65	3653972224	0	0.996	TRUE	17.33	17.13	17.64	4130726912	-0.1	0.9972	TRUE	17.27	17.06	17.59	2937681152	1.1	0.9951	TRUE	17.24	17	17.51	2394308	0.4	0.9665	ALIGNED	17.23	17.01	17.5	4235279	0.2	0.9722	ALIGNED	17.17	16.95	17.48	55487868	1.5	0.9881	TRUE
sp|P02666|CASB_BOVIN	LPLPL	276.6914++	2	276.691	LPLPL	17.37	17.14	17.65	123383056	-0.5	0.9858	TRUE	17.33	17.13	17.64	133741680	-0.6	0.9832	TRUE	17.29	17.06	17.59	110128528	0.6	0.9838	TRUE	17.2	17	17.51	120095	0.2	0.8295	ALIGNED	17.21	17.01	17.5	131907	-0.6	0.8415	ALIGNED	17.15	16.95	17.48	2469846	1	0.9718	TRUE
sp|P02666|CASB_BOVIN	LPLPLLQ	794.5022+	1	794.502	LPLPLLQ[+1]																													19.28	19.21	19.43	201747	2.1	0.9382	ALIGNED	19.24	19.07	19.45	3558782	4.4	0.9764	TRUE
sp|P02666|CASB_BOVIN	LPLPLLQ	397.7547++	2	397.755	LPLPLLQ[+1]																													19.32	19.21	19.43	94279	-1.2	0.8389	ALIGNED	19.24	19.07	19.45	1486140	3.2	0.9628	TRUE
sp|P02666|CASB_BOVIN	LPLP	439.2915+	1	439.291	LPLP	12.84	12.74	13.31	193206608	0.4	0.956	ALIGNED	12.81	12.73	12.93	133890616	-0.1	0.9792	ALIGNED	12.81	12.71	13.32	528405504	0.2	0.9693	TRUE	11.78	11.73	13.09	385064640	1	0.9865	TRUE	12.15	12.15	13.3	394375488	1.6	0.9901	TRUE	12.89	12.76	13.29	53910544	2.4	0.9909	TRUE
sp|P02666|CASB_BOVIN	LPLPLL	665.4596+	1	665.46	LPLPLL	20.7	20.55	21.01	9192676	-0.8	0.981	ALIGNED	20.69	20.54	20.97	11287161	-0.8	0.9776	ALIGNED	20.55	20.45	20.84	1563674	0.3	0.9048	ALIGNED	20.5	20.32	20.74	350396	2.2	0.9308	ALIGNED	20.47	20.31	20.76	1638793	4.1	0.9785	TRUE	20.43	20.23	20.72	77964960	2.8	0.9924	TRUE
sp|P02666|CASB_BOVIN	LPLPLL	333.2335++	2	333.233	LPLPLL	20.71	20.55	21.01	1327849	-0.8	0.9333	ALIGNED	20.69	20.54	20.97	1806298	-1.3	0.9369	ALIGNED	20.57	20.45	20.84	91606	-0.2	0.9233	ALIGNED	20.48	20.32	20.74	88780	1.5	0.9795	ALIGNED	20.47	20.31	20.76	388139	2.7	0.9744	TRUE	20.41	20.23	20.72	19154562	1.8	0.9924	TRUE
sp|P02666|CASB_BOVIN	LPLL	455.3228+	1	455.323	LPLL	14.97	14.87	15.09	21781062	-1	0.8766	TRUE	15.86	15.75	15.99	2859871	0	0.9483	ALIGNED	14.92	14.84	15.02	9466674	0.1	0.9213	ALIGNED	15.86	15.77	15.97	346163	2.8	0.87	ALIGNED	15.86	15.75	16.02	2090142	4.3	0.9712	ALIGNED	15.83	15.71	15.99	51110824	1.1	0.9854	TRUE
sp|P02666|CASB_BOVIN	LPLLQ	583.3814+	1	583.381	LPLLQ								13.59	13.52	13.82	1291148	-4.8	0.8828	ALIGNED								13.79	13.71	13.91	187739	2	0.8565	ALIGNED	13.79	13.68	13.91	1234161	1.4	0.9854	ALIGNED	13.76	13.64	13.92	20538294	-0.2	0.989	TRUE
sp|P02666|CASB_BOVIN	LPLLQ	292.1943++	2	292.194	LPLLQ																						13.77	13.71	13.91	111218	0.5	0.8204	ALIGNED	13.79	13.68	13.91	410430	0.7	0.9605	ALIGNED	13.76	13.64	13.92	6915030	-0.5	0.9906	TRUE
sp|P02666|CASB_BOVIN	LQS	348.1765+	1	348.177	LQ[+1]S	2.13	2.03	2.23	179844640	-0.5	0.8663	ALIGNED	2.11	1.99	2.22	65676164	-0.8	0.8364	ALIGNED								2.16	2.07	2.28	20343834	0.4	0.9853	TRUE	2.24	2.16	2.34	65467864	-0.7	0.987	ALIGNED	2.24	2.17	2.37	1995915	-0.6	0.9323	ALIGNED
sp|P02666|CASB_BOVIN	LQSW	533.2718+	1	533.272	LQSW	10.27	10.18	10.39	630158528	0.1	0.9787	TRUE	10.24	10.16	10.37	665008640	-0.2	0.9786	TRUE	10.28	10.08	10.32	21955742	-0.6	0.8796	ALIGNED	10.15	10.08	10.26	319383	1.4	0.9373	ALIGNED	10.16	10.1	10.27	460426	0.4	0.962	ALIGNED	10.35	10.28	10.47	1236788	0	0.9675	ALIGNED
sp|P02666|CASB_BOVIN	QSW	420.1878+	1	420.188	QSW	7.17	7.08	7.32	1535896320	-0.4	0.9832	TRUE	7.17	7.06	7.32	1817292032	-0.9	0.9838	TRUE	7.2	7.06	7.34	673888384	-0.7	0.9779	TRUE															7.3	7.18	7.44	3469571	-1	0.9587	ALIGNED
sp|P02666|CASB_BOVIN	WMHQPHQPLPPT	734.8613++	2	734.861	WMHQPHQPLPPT	9.86	9.74	10.07	49646176	-0.8	0.9825	TRUE	9.84	9.74	10.06	29950496	-1.3	0.9862	TRUE	9.86	9.69	9.99	11105831	-0.9	0.959	ALIGNED
sp|P02666|CASB_BOVIN	WMHQPHQPLPPT	490.2433+++	3	490.243	WMHQPHQPLPPT	9.84	9.74	10.07	123286944	-0.3	0.9845	TRUE	9.82	9.74	10.06	89561488	-0.8	0.9744	TRUE	9.83	9.69	9.99	38931584	-0.4	0.9743	ALIGNED
sp|P02666|CASB_BOVIN	WMHQPHQPLPPTVM	849.9158++	2	849.916	WMHQPHQPLPPTVM	12.78	12.66	13.1	59591028	0.1	0.9877	TRUE	12.75	12.61	12.95	31758252	-0.1	0.9746	TRUE
sp|P02666|CASB_BOVIN	WMHQPHQPLPPTVM	566.9463+++	3	566.946	WMHQPHQPLPPTVM	12.78	12.66	13.1	322119200	0.6	0.9929	TRUE	12.77	12.61	12.95	180143456	0.4	0.9953	TRUE	12.73	12.67	12.9	2454933	1	0.9699	ALIGNED
sp|P02666|CASB_BOVIN	MHQPHQPLPPT	649.8191++	2	649.819	M[+16]HQPHQPLPPT	6.53	6.45	6.81	35815748	0.3	0.9885	TRUE	6.52	6.44	6.68	28828772	-0.6	0.9921	TRUE	6.55	6.38	6.82	69771424	-0.2	0.9927	TRUE
sp|P02666|CASB_BOVIN	MHQPHQPLPPT	433.5485+++	3	433.549	M[+16]HQPHQPLPPT	6.54	6.45	6.81	71073856	0.4	0.9833	TRUE	6.54	6.44	6.68	53815052	-0.1	0.9864	TRUE	6.55	6.38	6.82	143607072	-0.1	0.9815	TRUE
sp|P02666|CASB_BOVIN	MHQPHQPLPPTVMFPPQSV	723.3642+++	3	723.364	MHQPHQPLPPTVMFPPQSV	16.07	15.78	17.3	527433216	0.4	0.9928	TRUE	16.02	15.79	17.31	478346592	0	0.996	TRUE	15.96	15.7	16.25	62608404	1.1	0.9517	TRUE															14.75	14.72	14.87	169009	2.1	0.8942	ALIGNED
sp|P02666|CASB_BOVIN	MHQPHQPLPPTVM	756.8761++	2	756.876	MHQPHQPLPPTVM	10.81	10.71	11.13	2292547072	-0.8	0.992	TRUE	10.79	10.7	11.17	2243299584	-1.1	0.9959	TRUE	10.8	10.69	11.13	219294928	-0.6	0.9855	TRUE
sp|P02666|CASB_BOVIN	MHQPHQPLPPTVM	504.9199+++	3	504.92	MHQPHQPLPPTVM	10.81	10.71	11.13	5557607936	-0.2	0.9947	TRUE	10.79	10.7	11.17	5219764736	-0.6	0.9942	TRUE	10.79	10.69	11.13	646401344	-0.7	0.989	TRUE															10.81	10.76	10.98	104367	-1.1	0.8847	ALIGNED
sp|P02666|CASB_BOVIN	MHQPH	649.2875+	1	649.287	MHQPH	1.13	1	1.19	131363808	-0.9	0.9648	TRUE	1.12	0.98	1.19	134848896	-1.4	0.9631	TRUE	1.12	1	1.2	80989776	-0.9	0.9616	TRUE
sp|P02666|CASB_BOVIN	MHQPH	325.1474++	2	325.147	MHQPH	1.12	1	1.19	71623640	-1.1	0.9631	TRUE	1.11	0.98	1.19	79289048	-1.8	0.9582	TRUE	1.11	1	1.2	45891124	-0.9	0.9357	TRUE
sp|P02666|CASB_BOVIN	MHQPHQPLPPTVM	764.8736++	2	764.874	M[+16]HQPHQPLPPTVM	10.29	10.16	10.52	93371720	-1.7	0.9712	TRUE	10.23	10.1	10.37	68485808	-1.9	0.9639	TRUE	10.22	10.13	10.38	9122099	-1.8	0.949	ALIGNED
sp|P02666|CASB_BOVIN	MHQPHQPLPPTVM	510.2515+++	3	510.251	M[+16]HQPHQPLPPTVM	10.29	10.16	10.52	158344896	-0.1	0.9882	TRUE	10.26	10.1	10.37	123719752	-0.4	0.9903	TRUE	10.22	10.13	10.38	17153022	-0.1	0.9639	ALIGNED
sp|P02666|CASB_BOVIN	MHQPHQPLPPT	1282.6361+	1	1282.64	MHQPHQPLPPT	7.39	7.29	7.64	88258912	0.3	0.9911	TRUE	7.38	7.28	7.72	103873008	0.1	0.9889	TRUE	7.41	7.28	7.69	145024768	0.2	0.9938	TRUE
sp|P02666|CASB_BOVIN	MHQPHQPLPPT	641.8217++	2	641.822	MHQPHQPLPPT	7.4	7.29	7.64	837024896	-0.8	0.9917	TRUE	7.41	7.28	7.72	999984512	-1.1	0.9938	TRUE	7.41	7.28	7.69	1363889408	-1	0.9905	TRUE															7.48	7.38	7.74	757719	-0.7	0.9822	ALIGNED
sp|P02666|CASB_BOVIN	MHQPHQPLPPT	428.2169+++	3	428.217	MHQPHQPLPPT	7.4	7.29	7.64	1239521536	-0.4	0.991	TRUE	7.39	7.28	7.72	1380377344	-0.7	0.9938	TRUE	7.41	7.28	7.69	2152697856	-0.5	0.9925	TRUE															7.48	7.38	7.74	2847975	-2.2	0.9489	ALIGNED
sp|P02666|CASB_BOVIN	MHQPHQPLPPTVM	764.8736++	2	764.874	MHQPHQPLPPTVM[+16]	8.59	8.52	9.04	134470208	0.5	0.9245	TRUE	8.57	8.49	8.7	69296024	-0.3	0.9653	TRUE
sp|P02666|CASB_BOVIN	MHQPHQPLPPTVM	510.2515+++	3	510.251	MHQPHQPLPPTVM[+16]	8.59	8.52	9.04	315668288	0.5	0.9869	TRUE	8.57	8.49	8.7	186464384	-0.1	0.9914	TRUE	8.59	8.52	9.03	46607988	0.6	0.9701	ALIGNED
sp|P02666|CASB_BOVIN	MHQPHQPL	987.4829+	1	987.483	MHQPHQPL	6.48	6.35	6.62	28691596	1	0.9846	TRUE	6.47	6.36	6.61	28401642	0.2	0.9886	TRUE	6.51	6.37	6.72	12113918	1.1	0.986	TRUE
sp|P02666|CASB_BOVIN	MHQPHQPL	494.2451++	2	494.245	MHQPHQPL	6.49	6.35	6.62	200720880	0.4	0.9791	TRUE	6.48	6.36	6.61	200186336	-0.4	0.9788	TRUE	6.51	6.37	6.72	81046352	-0.4	0.9836	TRUE
sp|P02666|CASB_BOVIN	MHQPHQPL	329.8325+++	3	329.832	MHQPHQPL	6.49	6.35	6.62	231107760	0.3	0.9801	TRUE	6.48	6.36	6.61	236851968	-0.4	0.9816	TRUE	6.51	6.37	6.72	103926816	-0.3	0.9768	TRUE
sp|P02666|CASB_BOVIN	MHQPHQPLPPTVMFPPQSV	728.6958+++	3	728.696	M[+16]HQPHQPLPPTVMFPPQSV	14.72	14.52	15.12	54446584	-1.5	0.9904	TRUE	14.71	14.44	15.02	40616776	-2	0.9936	ALIGNED	14.65	14.54	14.98	13736092	-0.8	0.9837	ALIGNED
sp|P02666|CASB_BOVIN	MHQPHQPLPPTV	1381.7045+	1	1381.7	MHQPHQPLPPTV	9.33	9.24	9.57	90362752	0.5	0.9747	TRUE	9.31	9.23	9.55	93988032	0.1	0.9607	TRUE	9.32	9.22	9.55	11909943	-0.4	0.8615	TRUE
sp|P02666|CASB_BOVIN	MHQPHQPLPPTV	691.3559++	2	691.356	MHQPHQPLPPTV	9.33	9.24	9.57	867659584	-0.4	0.9905	TRUE	9.31	9.23	9.55	900923520	-0.8	0.9918	TRUE	9.34	9.22	9.55	158496752	-0.6	0.9923	TRUE
sp|P02666|CASB_BOVIN	MHQPHQPLPPTV	461.2397+++	3	461.24	MHQPHQPLPPTV	9.33	9.24	9.57	1584258560	-0.6	0.9951	TRUE	9.31	9.23	9.55	1663380992	-0.9	0.9939	TRUE	9.34	9.22	9.55	301913280	-0.6	0.9916	TRUE
sp|P02666|CASB_BOVIN	HQPHQPLPPT	1151.5956+	1	1151.6	HQPHQPLPPT	6.29	6.17	6.92	68942304	1	0.986	TRUE	6.25	6.17	6.93	76811696	0.4	0.9915	TRUE	6.29	6.17	6.85	119154392	0.5	0.9915	TRUE
sp|P02666|CASB_BOVIN	HQPHQPLPPT	576.3014++	2	576.301	HQPHQPLPPT	6.29	6.17	6.92	465818752	0.7	0.9903	TRUE	6.26	6.17	6.93	500386496	0.2	0.9901	TRUE	6.27	6.17	6.85	831053248	0.3	0.99	TRUE															6.49	6.25	6.69	989770	2.8	0.8703	ALIGNED
sp|P02666|CASB_BOVIN	HQPHQPLPPT	384.5367+++	3	384.537	HQPHQPLPPT	6.29	6.17	6.92	436975360	0	0.9842	TRUE	6.26	6.17	6.93	451729696	-0.6	0.9889	TRUE	6.27	6.17	6.85	829514688	-0.3	0.9913	TRUE								6.4	6.26	6.57	97314	-0.5	0.9387	ALIGNED	6.34	6.25	6.69	2673229	0.1	0.9811	ALIGNED
sp|P02666|CASB_BOVIN	HQPHQPLPPTVM	466.5713+++	3	466.571	HQPHQPLPPTVM[+16]	7.72	7.41	8.1	100525680	-0.1	0.9988	TRUE	7.7	7.51	7.99	73347832	-0.3	0.9953	ALIGNED	7.71	7.56	8	13703138	-0.2	0.9284	ALIGNED
sp|P02666|CASB_BOVIN	HQPHQPLPPTV	625.8357++	2	625.836	HQPHQPLPPTV	8.48	8.38	8.75	430580032	-0.2	0.9909	TRUE	9.04	8.96	9.14	19299660	-0.8	0.997	TRUE	8.9	8.81	9.03	10877060	-0.4	0.898	TRUE
sp|P02666|CASB_BOVIN	HQPHQPLPPTV	417.5595+++	3	417.56	HQPHQPLPPTV	8.46	8.38	8.75	325936160	-0.7	0.9906	TRUE	9	8.96	9.14	38663664	-2.7	0.9546	TRUE
sp|P02666|CASB_BOVIN	HQPHQPLPPTVMFPPQSV	1019.0224++	2	1019.02	HQPHQPLPPTVMFPPQSV	15.82	15.68	17.03	36294512	2	0.9895	TRUE	16.6	15.66	17.01	34053680	2.2	0.9793	TRUE	15.78	15.63	15.97	3167221	0.6	0.8879	TRUE
sp|P02666|CASB_BOVIN	HQPHQPLPPTVMFPPQSV	679.6840+++	3	679.684	HQPHQPLPPTVMFPPQSV	15.84	15.68	17.03	293144640	0.5	0.9968	TRUE	15.82	15.66	17.01	271949664	0	0.9978	TRUE	15.74	15.63	15.97	14786634	1	0.9273	TRUE
sp|P02666|CASB_BOVIN	HQPHQPL	428.7248++	2	428.725	HQPHQPL	4.58	4.42	4.93	111841648	-0.9	0.9644	TRUE	4.55	4.4	4.68	89440096	-1.6	0.9768	TRUE	4.62	4.42	4.92	53829568	-0.7	0.9617	ALIGNED
sp|P02666|CASB_BOVIN	HQPHQPLPPTVM	1381.7045+	1	1381.7	HQPHQPLPPTVM								10.91	10.82	11.18	17465404	0.2	0.8919	TRUE	10.1	9.94	10.11	4422805	1.4	0.9485	TRUE
sp|P02666|CASB_BOVIN	HQPHQPLPPTVM	691.3559++	2	691.356	HQPHQPLPPTVM	10.95	10.82	11.14	114295328	-1.1	0.9088	TRUE	10.91	10.82	11.18	111785784	-1.2	0.9599	TRUE
sp|P02666|CASB_BOVIN	HQPHQPLPPTVM	461.2397+++	3	461.24	HQPHQPLPPTVM	10.95	10.82	11.14	278279168	-0.7	0.9664	TRUE	10.91	10.82	11.18	267903648	-0.9	0.9843	TRUE	10.07	9.94	10.11	45353120	-0.5	0.9925	TRUE
sp|P02666|CASB_BOVIN	QPHQPLPPTVM	622.8264++	2	622.826	QPHQPLPPTVM	11.53	11.36	11.8	33858352	1.3	0.9288	ALIGNED	11.51	11.42	11.76	32157336	0.8	0.9355	TRUE	11.52	11.38	11.62	3627484	1.7	0.8346	ALIGNED															11.47	11.4	11.56	81493	-0.2	0.8604	ALIGNED
sp|P02666|CASB_BOVIN	QPLPPTV	751.4349+	1	751.435	QPLPPTV	10.74	10.4	11.25	174932672	0.3	0.9584	TRUE	10.91	10.41	11.2	200594368	0.5	0.9299	TRUE	10.68	10.42	10.9	38855716	0.5	0.9815	ALIGNED								10.69	10.55	10.83	211365	3.1	0.8846	ALIGNED	10.89	10.79	10.99	219345	0.8	0.8057	ALIGNED
sp|P02666|CASB_BOVIN	PLPPT	524.3079+	1	524.308	PLPPT															9.38	9.21	9.56	76132376	-0.4	0.955	TRUE
sp|P02666|CASB_BOVIN	LPPT	427.2551+	1	427.255	LPPT	5.97	5.97	6.42	10254531	3.1	0.8073	ALIGNED								5.84	5.53	7.15	94018600	0.2	0.9504	ALIGNED	5.73	5.55	6.75	6896684	0.8	0.9757	ALIGNED	5.75	5.56	6.77	85225960	0.1	0.9822	TRUE	5.81	5.58	7.05	114705312	-0.3	0.9894	TRUE
sp|P02666|CASB_BOVIN	PTV	316.1867+	1	316.187	PTV	4.17	4.09	4.27	146867264	-1.7	0.9814	TRUE	4.15	4.08	4.26	176474784	-1.9	0.9845	TRUE	4.2	4.12	4.28	176978560	-1.5	0.98	TRUE	4.23	4.12	4.41	87061	1.3	0.887	ALIGNED	4.28	4.19	4.32	244437	-1.8	0.9107	ALIGNED
sp|P02666|CASB_BOVIN	PTVM	463.2221+	1	463.222	PTVM[+16]	3.11	2.98	3.23	19694288	-0.7	0.931	TRUE	3.1	2.99	3.22	16621276	-0.9	0.8826	TRUE	3.06	2.99	3.23	3832716	-0.2	0.8202	ALIGNED	3.37	3.26	3.48	1350742	0.9	0.9106	ALIGNED
sp|P02666|CASB_BOVIN	MFPPQSV	411.1967++	2	411.197	M[+16]FPPQSV	13.08	12.94	13.18	10489355	-0.2	0.9421	ALIGNED	13.05	12.88	13.16	9399915	-0.6	0.9347	ALIGNED	13.03	12.87	13.14	15623623	0	0.9354	TRUE															13.06	12.91	13.29	55316	2.5	0.8133	ALIGNED
sp|P02666|CASB_BOVIN	MFPPQSV	805.3913+	1	805.391	MFPPQSV	12.43	11.26	12.44	438643104	-0.5	0.9633	TRUE	13.69	13.44	13.82	218760048	0.4	0.9807	TRUE	13.56	13.2	13.81	309954144	0.9	0.9842	TRUE															13.43	13.22	13.58	548422	0.7	0.8638	ALIGNED
sp|P02666|CASB_BOVIN	MFPPQSV	403.1993++	2	403.199	MFPPQSV	12.09	11.26	12.44	280226400	-0.3	0.9642	TRUE	13.44	13.44	13.82	64089504	0.6	0.9486	TRUE	13.22	13.2	13.81	110799104	1	0.9413	TRUE															13.4	13.22	13.58	865220	3.1	0.8393	ALIGNED
sp|P02666|CASB_BOVIN	FPP	360.1918+	1	360.192	FPP																						10.24	10.22	10.75	487092	0.1	0.8845	ALIGNED	10.15	10.05	10.29	3092079	0.4	0.9775	TRUE	10.16	9.86	10.7	7422907	-0.2	0.9781	TRUE
sp|P02666|CASB_BOVIN	FPPQS	575.2824+	1	575.282	FPPQS								9.36	9.2	9.49	51971916	0.5	0.9843	TRUE																						7.42	7.29	7.49	4253509	-2.2	0.9526	TRUE
sp|P02666|CASB_BOVIN	FPPQS	288.1448++	2	288.145	FPPQS								9.38	9.2	9.49	1390553	-0.7	0.8415	TRUE																						7.42	7.29	7.49	429838	-0.4	0.8205	TRUE
sp|P02666|CASB_BOVIN	FPPQ	488.2504+	1	488.25	FPPQ	8.55	8.24	8.87	225387808	0.3	0.9866	TRUE	8.54	8.21	8.86	242061312	-0.2	0.9745	TRUE	8.58	8.23	8.79	283887264	-0.1	0.9807	TRUE								9.65	9.37	9.74	3164974	0.9	0.9878	TRUE	7.22	7.02	7.32	9064127	1.5	0.9054	TRUE
sp|P02666|CASB_BOVIN	FPPQSVL	787.4349+	1	787.435	FPPQSVL	14.72	14.21	15.06	283722240	-1	0.9522	TRUE	14.62	14.17	15.23	364527520	-1.3	0.9804	TRUE	14.09	14.01	14.48	27876500	-2.2	0.9619	ALIGNED															15.73	15.68	16.19	1825656	-1.1	0.9148	ALIGNED
sp|P02666|CASB_BOVIN	FPPQSVL	394.2211++	2	394.221	FPPQSVL	14.66	14.21	15.06	160951840	-0.8	0.9795	TRUE	14.69	14.17	15.23	131396144	-1.1	0.9751	TRUE	14.09	14.01	14.48	13774140	-0.7	0.9844	ALIGNED															15.68	15.68	16.19	1028433	0.7	0.9701	ALIGNED
sp|P02666|CASB_BOVIN	FPPQSV	674.3508+	1	674.351	FPPQSV	10.95	10.13	11.15	7364599808	-0.6	0.9914	TRUE	10.92	10.1	11.13	8107270656	-1	0.9911	TRUE	12.49	11.98	13.04	8311002112	-0.7	0.9939	TRUE															12.52	12.37	12.62	2030901	-1	0.9549	ALIGNED
sp|P02666|CASB_BOVIN	FPPQSV	337.6790++	2	337.679	FPPQSV	10.96	10.13	11.15	2041342208	-0.8	0.9847	TRUE	10.91	10.1	11.13	2127069696	-1.1	0.9868	TRUE	11.99	11.98	13.04	1619321984	-0.7	0.9899	TRUE															12.52	12.37	12.62	801905	-0.5	0.9664	ALIGNED
sp|P02666|CASB_BOVIN	PPQSVL	640.3665+	1	640.366	PPQSVL	9.92	9.84	10.1	97739736	-1.1	0.9764	TRUE	9.9	9.81	10.1	94467840	-1.5	0.9784	TRUE	9.91	9.9	10.06	1562799	1	0.8775	ALIGNED															9.94	9.81	10.31	1229551	0.3	0.905	ALIGNED
sp|P02666|CASB_BOVIN	PPQSV	527.2824+	1	527.282	PPQSV	4.74	4.6	5.02	562294208	-0.1	0.9806	TRUE	4.73	4.59	5.05	647630016	-0.3	0.9823	TRUE
sp|P02666|CASB_BOVIN	PPQSV	264.1448++	2	264.145	PPQSV	5.01	4.6	5.02	48811272	1.4	0.8359	TRUE	4.98	4.59	5.05	68410024	1.2	0.818	TRUE	4.71	4.6	4.91	22869048	-0.2	0.9335	TRUE
sp|P02666|CASB_BOVIN	LSL	332.2180+	1	332.218	LSL	10.58	10.49	10.71	648354944	-0.5	0.9818	TRUE	11.03	10.94	11.12	563669248	-1	0.981	TRUE	9.93	9.85	10.05	107033456	-0.7	0.9738	TRUE	9.97	9.88	10.12	1002511	-0.2	0.9126	ALIGNED	11.12	11.02	11.22	678365	-1.1	0.9702	ALIGNED
sp|P02666|CASB_BOVIN	LSLSQ	547.3086+	1	547.309	LSLSQ	8.3	8.2	8.39	38171516	-0.4	0.9702	TRUE	8.3	8.25	8.37	28345748	-0.6	0.9808	ALIGNED	8.43	8.05	8.44	8887499	0	0.8621	ALIGNED								8.38	8.32	8.45	268824	-0.9	0.8634	ALIGNED	8.37	8.31	8.57	416258	-3.2	0.8535	ALIGNED
sp|P02666|CASB_BOVIN	SLSQSK	649.3515+	1	649.352	SLSQSK	1.26	1.16	1.32	1308454912	-1.1	0.9924	TRUE	1.26	1.15	1.32	524361280	-1.3	0.9913	TRUE	1.26	1.11	1.41	10756288	-0.3	0.9494	ALIGNED															1.56	1.45	1.74	66458	1	0.8483	ALIGNED
sp|P02666|CASB_BOVIN	SLSQSK	325.1794++	2	325.179	SLSQSK	1.24	1.16	1.32	628445824	-1.5	0.9925	TRUE	1.25	1.15	1.32	253898784	-1.6	0.9737	TRUE																						1.56	1.45	1.74	551102	-0.1	0.9601	ALIGNED
sp|P02666|CASB_BOVIN	LSQ	348.1765+	1	348.177	LSQ[+1]	3.11	3.02	3.2	38225588	-1.1	0.9665	TRUE	3.1	3.03	3.19	30243752	-1.4	0.9733	ALIGNED	3.1	3.02	3.2	25893276	-0.9	0.94	ALIGNED	3.45	3.36	3.59	73521	3	0.8219	ALIGNED
sp|P02666|CASB_BOVIN	LSQSK	562.3195+	1	562.32	LSQSK	0.84	0.82	0.91	46354696	-1.3	0.9861	TRUE	0.84	0.79	0.93	20195528	-2	0.9697	ALIGNED
sp|P02666|CASB_BOVIN	SKVLPVPQ	434.2686++	2	434.269	SKVLPVPQ	9.74	9.64	9.97	34948648	0	0.9815	TRUE	9.74	9.64	9.97	20461050	-0.3	0.9816	ALIGNED	9.76	9.64	9.92	9856484	-0.1	0.9922	ALIGNED								9.91	9.8	10.12	684171	3.4	0.9509	ALIGNED
sp|P02666|CASB_BOVIN	KVL	359.2653+	1	359.265	KVL	5.16	5.06	5.29	61697320	-0.6	0.979	TRUE	5.15	5.02	5.28	52413264	-1.5	0.9664	TRUE	4.2	4.12	4.31	8827835	-0.8	0.8983	ALIGNED															4.36	4.29	4.48	208401	-0.7	0.9265	ALIGNED
sp|P02666|CASB_BOVIN	KVLP	456.3180+	1	456.318	KVLP	6.38	6.3	6.54	19286912	0.2	0.9643	ALIGNED	6.39	6.27	6.57	18413578	-0.9	0.9627	ALIGNED	6.4	6.31	6.57	15949590	0.2	0.9723	ALIGNED	6.41	6.33	6.54	5035282	1.1	0.9777	TRUE	6.51	6.42	6.77	27752550	0.2	0.9804	TRUE	6.53	6.42	6.65	4136443	0	0.9799	TRUE
sp|P02666|CASB_BOVIN	KVLP	228.6627++	2	228.663	KVLP	6.38	6.3	6.54	3940956	0.5	0.9478	ALIGNED	6.36	6.27	6.57	3697685	-0.5	0.8788	ALIGNED	6.4	6.31	6.57	3571958	-0.1	0.9497	ALIGNED	6.41	6.33	6.54	2164871	0.8	0.9828	TRUE	6.51	6.42	6.77	6351956	0.2	0.9825	TRUE	6.51	6.42	6.65	1650468	0.3	0.9802	TRUE
sp|P02666|CASB_BOVIN	KVLPVPQ	780.4978+	1	780.498	KVLPVPQ	9.34	9.17	9.67	184080896	-0.5	0.985	TRUE	9.37	9.17	9.64	155918288	-0.7	0.9899	TRUE	9.34	9.17	9.66	134574320	-0.5	0.9855	TRUE	9.38	9.18	9.65	50248	0.4	0.8021	ALIGNED	9.37	9.23	9.75	464049	3	0.8695	ALIGNED	9.35	9.19	9.76	4260126	-0.2	0.973	TRUE
sp|P02666|CASB_BOVIN	KVLPVPQ	390.7525++	2	390.753	KVLPVPQ	9.34	9.17	9.67	280875968	-0.5	0.9848	TRUE	9.37	9.17	9.64	240751056	-0.8	0.9852	TRUE	9.35	9.17	9.66	220704880	-0.5	0.9865	TRUE	9.38	9.18	9.65	1135956	0.3	0.9788	ALIGNED	9.42	9.23	9.75	3031291	1.2	0.9693	ALIGNED	9.36	9.19	9.76	33957552	-0.4	0.9892	TRUE
sp|P02666|CASB_BOVIN	VLPVPQ	652.4028+	1	652.403	VLPVPQ	10.36	10.27	10.59	28827836416	-0.8	0.9929	TRUE	10.38	10.25	10.59	31058661376	-1.2	0.9938	TRUE	10.36	10.24	10.57	27402266624	-0.7	0.993	TRUE	10.46	10.35	10.56	770245	0.4	0.9844	TRUE	10.46	10.37	10.57	4404952	0.2	0.9868	TRUE	10.45	10.34	10.57	70241448	-0.7	0.9896	TRUE
sp|P02666|CASB_BOVIN	VLPVPQ	326.7051++	2	326.705	VLPVPQ	10.37	10.27	10.59	12445309952	-1	0.9928	TRUE	10.35	10.25	10.59	13118375936	-1.4	0.9933	TRUE	10.37	10.24	10.57	12500078592	-0.9	0.9932	TRUE	10.46	10.35	10.56	627904	0.4	0.8104	TRUE	10.46	10.37	10.57	3351693	0.2	0.9721	TRUE	10.44	10.34	10.57	51199888	-0.9	0.9875	TRUE
sp|P02666|CASB_BOVIN	VLPVPQK	780.4978+	1	780.498	VLPVPQK	8.1	7.99	8.28	1053598912	-1.2	0.9925	TRUE	8.11	7.99	8.3	186411968	-1.5	0.9905	TRUE	8.13	8.02	8.28	14379955	-0.6	0.9236	TRUE								8.27	8.22	8.3	23496	1.9	0.8174	ALIGNED	8.25	8.11	8.42	1087450	-0.1	0.9838	TRUE
sp|P02666|CASB_BOVIN	VLPVPQK	390.7525++	2	390.753	VLPVPQK	8.1	7.99	8.28	4102996992	-1	0.9938	TRUE	8.1	7.99	8.3	700202496	-1.5	0.9864	TRUE	8.12	8.02	8.28	49859272	-0.9	0.984	TRUE															8.24	8.11	8.42	11434540	-0.7	0.9849	TRUE
sp|P02666|CASB_BOVIN	VLPV	427.2915+	1	427.291	VLPV	10.46	10.34	10.56	1198559232	-0.6	0.9855	TRUE	10.44	10.33	10.56	1018991808	-1.1	0.9816	TRUE	10.45	10.35	10.59	963627776	-0.4	0.9843	TRUE								10.45	10.41	10.49	15548	2.1	0.8863	ALIGNED
sp|P02666|CASB_BOVIN	VLPVPQ	327.1971++	2	327.197	VLPVPQ[+1]																																				11.18	11.09	11.29	5333190	-2.2	0.9765	TRUE
sp|P02666|CASB_BOVIN	LPVPQK	681.4294+	1	681.429	LPVPQK	6.84	6.71	6.96	24945848	-0.4	0.979	TRUE	6.83	6.7	6.94	3792685	0.3	0.8406	ALIGNED																						6.92	6.81	7.09	480972	-0.9	0.9007	TRUE
sp|P02666|CASB_BOVIN	LPVPQK	341.2183++	2	341.218	LPVPQK	6.85	6.71	6.96	68374904	-1.5	0.9836	TRUE	6.83	6.7	6.94	12065385	-1.7	0.9297	ALIGNED								6.87	6.77	7	308391	0.1	0.9523	ALIGNED	6.91	6.81	7.03	439045	1	0.9054	ALIGNED	6.92	6.81	7.09	5880017	-0.4	0.9831	TRUE
sp|P02666|CASB_BOVIN	LPVPQ	553.3344+	1	553.334	LPVPQ	8.87	8.76	8.99	1589037952	-0.1	0.9891	TRUE	8.89	8.75	8.97	1923996544	-0.6	0.9914	TRUE	8.89	8.76	9	1629413504	0.2	0.9909	TRUE	8.89	8.77	9.04	3501559	1.3	0.9815	TRUE	8.91	8.81	9.03	5960838	1	0.9814	TRUE	8.9	8.78	9.03	29796242	0.4	0.9886	TRUE
sp|P02666|CASB_BOVIN	LPVPQ	277.1708++	2	277.171	LPVPQ	8.89	8.76	8.99	340210016	-0.2	0.9812	TRUE	8.87	8.75	8.97	447767296	-0.7	0.9827	TRUE	8.89	8.76	9	401219392	-0.3	0.9865	TRUE	8.89	8.77	9.04	1926563	1.1	0.9712	TRUE	8.91	8.81	9.03	2487326	0.9	0.9817	TRUE	8.9	8.78	9.03	12483888	0.1	0.9834	TRUE
sp|P02666|CASB_BOVIN	PVPQK	568.3453+	1	568.345	PVPQK	8.1	7.99	8.28	2144981504	-0.7	0.9893	TRUE	8.1	7.99	8.27	354216160	-1.2	0.9872	TRUE	8.13	8.03	8.26	26579906	-1	0.9664	TRUE								7.74	7.63	8.14	3011858	-0.3	0.9609	ALIGNED	8.23	8.1	8.46	5674835	0.2	0.983	ALIGNED
sp|P02666|CASB_BOVIN	PVPQK	284.6763++	2	284.676	PVPQK	8.1	7.99	8.28	74663408	-0.8	0.9705	TRUE	8.1	7.99	8.27	12349594	-0.9	0.9341	TRUE								7.95	7.95	8.3	78292	0.1	0.8622	ALIGNED	7.75	7.63	8.14	8819308	-0.6	0.9726	ALIGNED	8.1	8.1	8.46	242487	-1.7	0.8412	ALIGNED
sp|P02666|CASB_BOVIN	PVPQ	440.2504+	1	440.25	PVPQ	10.36	10.26	10.6	3946586368	-0.7	0.9817	TRUE	10.34	10.25	10.59	4227125504	-1.1	0.9843	TRUE	10.35	10.24	10.56	4015223808	-0.7	0.9828	TRUE	3.47	3.35	3.67	3921464	0.3	0.9779	TRUE	3.55	3.38	3.71	4713542	-0.5	0.9773	TRUE	10.44	10.33	10.58	16199069	-1.2	0.9784	TRUE
sp|P02666|CASB_BOVIN	KAVPYPQ	802.4458+	1	802.446	KAVPYPQ	6.86	6.78	6.98	587179008	-0.6	0.9974	TRUE	6.86	6.77	6.98	610059840	-0.9	0.9981	TRUE	6.89	6.79	6.99	752998912	-0.6	0.9914	TRUE	6.94	6.85	7.08	214256	0.6	0.9767	ALIGNED	6.96	6.82	7.09	1459756	0	0.9879	ALIGNED	6.95	6.86	7.11	7287186	-0.5	0.9915	TRUE
sp|P02666|CASB_BOVIN	KAVPYPQ	401.7265++	2	401.727	KAVPYPQ	6.86	6.78	6.98	687527168	-0.8	0.9947	TRUE	6.86	6.77	6.98	642903424	-1.1	0.9938	TRUE	6.87	6.79	6.99	974821696	-0.7	0.9973	TRUE	6.94	6.85	7.08	1119985	0.2	0.9666	ALIGNED	6.96	6.82	7.09	3089136	-0.4	0.9795	ALIGNED	6.96	6.86	7.11	27772704	-0.8	0.9933	TRUE
sp|P02666|CASB_BOVIN	KAVP	414.2711+	1	414.271	KAVP	2.47	2.36	2.56	58496732	-0.2	0.9781	TRUE	2.46	2.37	2.53	50856652	-0.8	0.9758	TRUE	2.46	2.39	2.54	83829992	-0.5	0.9778	TRUE								2.76	2.68	2.92	59269	-0.6	0.8073	ALIGNED	2.75	2.5	3.01	433366	0.3	0.974	ALIGNED
sp|P02666|CASB_BOVIN	KAVPY	577.3344+	1	577.334	KAVPY	6.2	6.03	6.32	169775392	0.3	0.9844	TRUE	6.18	6.08	6.31	153380576	-0.3	0.9862	TRUE	6.19	6.06	6.33	262257280	-0.1	0.9893	TRUE															6.29	6.2	6.4	85788	-0.9	0.8548	ALIGNED
sp|P02666|CASB_BOVIN	KAVPY	289.1708++	2	289.171	KAVPY	6.19	6.03	6.32	104608696	0	0.9832	TRUE	6.18	6.08	6.31	96375104	-0.5	0.9811	TRUE	6.2	6.06	6.33	189680768	-0.2	0.9841	TRUE															6.28	6.2	6.4	147069	0	0.8551	ALIGNED
sp|P02666|CASB_BOVIN	AVPYPQ	675.3348+	1	675.335	AVPYPQ[+1]	8.88	8.63	9	74504136	-3.6	0.8857	TRUE																													8.89	8.78	9.01	4201260	1.7	0.993	TRUE
sp|P02666|CASB_BOVIN	AVPYPQ	338.1710++	2	338.171	AVPYPQ[+1]	8.88	8.63	9	18621728	-1.4	0.9364	TRUE	8.87	8.7	8.97	13995173	-2.8	0.8939	ALIGNED															8.93	8.87	9.21	263059	-1.7	0.8623	ALIGNED	8.89	8.78	9.01	3082410	-0.2	0.9606	TRUE
sp|P02666|CASB_BOVIN	AVPY	449.2395+	1	449.239	AVPY	7.78	7.71	7.9	636886336	-0.1	0.9899	TRUE	7.79	7.71	7.9	646393152	-0.4	0.9902	TRUE	7.78	7.7	7.91	704661504	0	0.9878	TRUE															7.83	7.77	7.93	242130	3.1	0.888	ALIGNED
sp|P02666|CASB_BOVIN	AVPYPQ	674.3508+	1	674.351	AVPYPQ	8.19	8.01	8.41	17332598784	-1.1	0.9928	TRUE	8.19	8	8.4	19449405440	-1.4	0.9938	TRUE	8.18	8.03	8.42	14940377088	-0.9	0.9933	TRUE	8.27	8.1	8.46	665341	0.1	0.9001	ALIGNED	8.29	8.11	8.54	4384036	-0.4	0.9047	ALIGNED	8.3	8.07	8.45	30277912	-0.1	0.9941	TRUE
sp|P02666|CASB_BOVIN	AVPYPQ	337.6790++	2	337.679	AVPYPQ	8.19	8.01	8.41	5244497920	-1.4	0.9913	TRUE	8.14	8	8.4	5275985920	-1.7	0.9924	TRUE	8.18	8.03	8.42	5153943040	-1.3	0.9928	TRUE	8.3	8.1	8.46	839523	-0.5	0.9255	ALIGNED	8.3	8.11	8.54	3268561	-1.1	0.9116	ALIGNED	8.3	8.07	8.45	28958534	-0.7	0.9937	TRUE
sp|P02666|CASB_BOVIN	VPYPQR	380.2110++	2	380.211	VPYPQR																						6.24	6.12	6.42	437387	0.1	0.9847	ALIGNED	6.28	6.11	6.37	555008	0.1	0.8984	ALIGNED	6.28	6.02	6.42	1981584	-0.4	0.9857	TRUE
sp|P02666|CASB_BOVIN	VPYPQRDMP	551.7711++	2	551.771	VPYPQRDMP																																				10.08	9.98	10.22	6052810	1.8	0.9834	TRUE
sp|P02666|CASB_BOVIN	VPYPQ	603.3137+	1	603.314	VPYPQ	7.38	7.21	7.58	244666048	-0.3	0.9878	TRUE	7.38	7.2	7.56	292615616	-0.8	0.9918	TRUE	7.4	7.18	7.58	310812992	-0.8	0.9946	TRUE	7.4	7.21	7.64	5355507	-0.1	0.9887	TRUE	7.41	7.25	7.64	9743035	-0.5	0.9829	TRUE	7.42	7.25	7.62	34002884	-1.8	0.9852	TRUE
sp|P02666|CASB_BOVIN	VPYPQ	302.1605++	2	302.16	VPYPQ	7.38	7.21	7.58	51809432	-0.8	0.9682	TRUE	7.38	7.2	7.56	57753852	-1.3	0.9825	TRUE	7.4	7.18	7.58	69370040	-1	0.9925	TRUE	7.43	7.21	7.64	3448717	-0.5	0.9817	TRUE	7.43	7.25	7.64	4668076	-1.1	0.9628	TRUE	7.44	7.25	7.62	14548200	-1.7	0.9887	TRUE
sp|P02666|CASB_BOVIN	PYP	376.1867+	1	376.187	PYP	5.62	5.51	5.71	48021016	0.2	0.9862	TRUE	5.61	5.51	5.71	52121504	-0.5	0.9838	TRUE	5.64	5.55	5.74	171714432	0.4	0.9787	TRUE	5.64	5.53	5.79	161889	4.7	0.8802	ALIGNED	5.69	5.52	5.86	874618	-1.5	0.878	ALIGNED	5.7	5.69	5.98	546387	0.9	0.8971	ALIGNED
sp|P02666|CASB_BOVIN	PYPQ	504.2453+	1	504.245	PYPQ	8.15	8	8.42	4187514112	-0.8	0.988	TRUE	8.14	8	8.41	4324005888	-1.2	0.9895	TRUE	8.18	8.01	8.43	4024451840	-0.7	0.9887	TRUE	8.29	8.14	8.54	526677	0.9	0.9288	ALIGNED	8.29	8.16	8.53	2090114	1.1	0.9208	ALIGNED	8.3	8.08	8.47	22279360	0.1	0.9864	TRUE
sp|P02666|CASB_BOVIN	PYPQ	252.6263++	2	252.626	PYPQ	8.16	8	8.42	95644840	-0.9	0.9663	TRUE	8.14	8	8.41	99131176	-1.4	0.9654	TRUE	8.18	8.01	8.43	90747152	-0.9	0.9645	TRUE								8.44	8.16	8.53	254568	0.7	0.8154	ALIGNED	8.44	8.08	8.47	778702	-0.1	0.9356	TRUE
sp|P02666|CASB_BOVIN	RDMPIQAFL	545.7893++	2	545.789	RDMPIQAFL																						17.35	17.32	17.57	93004	1.9	0.8764	ALIGNED	17.42	17.31	17.53	144614	4.7	0.9627	ALIGNED	17.36	17.16	17.54	3577513	2.5	0.9736	TRUE
sp|P02666|CASB_BOVIN	RDMPIQ	759.3818+	1	759.382	RDMPIQ	7.04	6.95	7.16	281730912	-0.7	0.9748	TRUE	7.04	6.94	7.15	271051328	-1	0.9753	TRUE	7.04	6.94	7.16	278257184	-0.6	0.9744	TRUE															7.12	7.04	7.29	984404	-1	0.9715	TRUE
sp|P02666|CASB_BOVIN	RDMPIQ	380.1945++	2	380.195	RDMPIQ	7.04	6.95	7.16	539401408	-0.6	0.9601	TRUE	7.04	6.94	7.15	537909632	-1	0.9642	TRUE	7.04	6.94	7.16	520133632	-0.6	0.9608	TRUE															7.12	7.04	7.29	7090925	-0.9	0.945	TRUE
sp|P02666|CASB_BOVIN	RDMPIQ	388.1920++	2	388.192	RDM[+16]PIQ	4.12	4.07	4.27	11068728	-0.7	0.838	ALIGNED	4.11	4.05	4.28	10586638	-1.1	0.8665	ALIGNED	4.02	3.95	4.08	12164439	-1	0.9303	TRUE															4.14	4.08	4.41	1939854	-4.8	0.9118	ALIGNED
sp|P02666|CASB_BOVIN	RDMPI	631.3232+	1	631.323	RDMPI	8.49	8.37	8.7	1495789312	1.2	0.9373	TRUE	8.49	8.35	8.69	1815162368	0.4	0.943	TRUE	8.52	8.36	8.7	1929131648	0.6	0.944	TRUE
sp|P02666|CASB_BOVIN	RDMPI	316.1652++	2	316.165	RDMPI	8.49	8.37	8.7	1533467136	-0.4	0.9512	TRUE	8.49	8.35	8.69	2001322112	-0.9	0.9395	TRUE	8.52	8.36	8.7	2418864128	-0.5	0.9385	TRUE	8.59	8.45	8.68	56293	4.5	0.9305	ALIGNED								8.55	8.44	8.81	866732	3.3	0.9024	ALIGNED
sp|P02666|CASB_BOVIN	RDMPIQA	415.7131++	2	415.713	RDMPIQA	8.56	8.48	8.7	29582296	-0.2	0.973	ALIGNED	8.56	8.46	8.69	28768488	-0.9	0.9752	ALIGNED	8.57	8.43	8.72	10269052	-1.1	0.9711	ALIGNED								8.63	8.55	8.91	225262	-1.4	0.8735	ALIGNED	8.61	8.49	8.73	4209254	0.2	0.9675	TRUE
sp|P02666|CASB_BOVIN	RDMPIQAFLL	602.3314++	2	602.331	RDMPIQAFLL																						19.62	19.51	19.82	159092	4.1	0.9659	ALIGNED	19.62	19.49	19.74	195041	3.8	0.9751	ALIGNED	19.54	19.4	19.78	2675877	4.1	0.9884	TRUE
sp|P02666|CASB_BOVIN	RDMPI	647.3181+	1	647.318	RDM[+16]PI	5.07	4.95	5.22	70622104	-0.6	0.9624	ALIGNED	5.07	4.87	5.15	74188504	-1.4	0.9607	TRUE	5.11	4.97	5.24	115367040	-0.9	0.9567	ALIGNED
sp|P02666|CASB_BOVIN	RDMPIQAF	489.2473++	2	489.247	RDMPIQAF																													13.27	13.15	13.35	51760	2	0.8214	ALIGNED	13.23	13.14	13.4	11684256	3.5	0.981	TRUE
sp|P02666|CASB_BOVIN	DMPIQA	674.3178+	1	674.318	DMPIQA	10.11	10.04	10.21	4580434944	-0.4	0.9719	TRUE	10.09	10.02	10.19	4253349888	-1	0.9714	TRUE	10.07	9.97	10.09	154851104	-0.1	0.9716	ALIGNED	10.17	10.08	10.39	801347	0.4	0.9667	ALIGNED	10.17	10.08	10.36	4292142	0.7	0.966	ALIGNED	10.16	10.08	10.28	9779802	1.4	0.9641	ALIGNED
sp|P02666|CASB_BOVIN	DMPIQA	690.3127+	1	690.313	DM[+16]PIQA	6.86	6.78	6.97	210271888	-0.8	0.9601	ALIGNED	6.86	6.76	6.96	170414112	-1	0.9559	TRUE	6.87	6.78	6.99	90644280	-0.6	0.9709	TRUE
sp|P02666|CASB_BOVIN	DMPIQ	619.2756+	1	619.276	DM[+16]PIQ	4.66	4.62	4.8	70343744	-0.9	0.9506	TRUE	4.66	4.6	4.77	57386480	-1.2	0.9589	TRUE	4.56	4.51	4.63	37907988	-0.7	0.9541	TRUE
sp|P02666|CASB_BOVIN	DMPIQ	603.2807+	1	603.281	DMPIQ	8.4	8.33	8.52	4925810176	-0.6	0.9723	TRUE	8.39	8.32	8.51	4544165376	-1	0.9688	TRUE	8.42	8.35	8.54	2625748224	-0.3	0.9681	TRUE	8.47	8.38	8.58	684715	-2.2	0.9511	ALIGNED	8.48	8.36	8.63	2677883	0.5	0.9753	TRUE	8.48	8.37	8.58	22287152	0.2	0.9514	TRUE
sp|P02666|CASB_BOVIN	DMPIQ	302.1440++	2	302.144	DMPIQ	8.4	8.33	8.52	1217053824	-0.7	0.951	TRUE	8.39	8.32	8.51	1069582784	-1.2	0.9566	TRUE	8.42	8.35	8.54	746215744	-0.4	0.9543	TRUE								8.48	8.36	8.63	2126811	-1.9	0.8951	TRUE	8.48	8.37	8.58	15188819	-0.6	0.9348	TRUE
sp|P02666|CASB_BOVIN	MPIQ	488.2537+	1	488.254	MPIQ	7.14	7.03	7.31	57726648	-2.4	0.9658	ALIGNED	7.15	6.99	7.33	100391624	-2.2	0.9732	TRUE	7.13	7.05	7.33	62999328	-3.5	0.9548	ALIGNED	7.19	7.07	7.25	566490	-3.2	0.8243	ALIGNED								7.23	7.02	7.32	9099986	-4.3	0.9458	ALIGNED
sp|P02666|CASB_BOVIN	MPIQAF	706.3593+	1	706.359	MPIQAF																																				14.38	14.27	14.54	8805367	1.3	0.9631	TRUE
sp|P02666|CASB_BOVIN	MPIQA	559.2908+	1	559.291	MPIQA	9.03	8.96	9.17	142754160	-0.5	0.9458	TRUE	9.04	8.94	9.14	204930160	-0.6	0.9384	TRUE	9.06	8.96	9.17	128524864	-0.4	0.9507	TRUE	9.06	8.97	9.26	379599	1.6	0.9329	ALIGNED	9.09	8.96	9.23	2427358	0.5	0.946	ALIGNED	9.08	8.94	9.22	7753488	-0.4	0.9438	TRUE
sp|P02666|CASB_BOVIN	PIQ	357.2132+	1	357.213	PIQ	2.3	2.24	2.38	46618240	-0.8	0.98	TRUE	2.29	2.23	2.36	49193364	-1.1	0.9759	TRUE	2.3	2.25	2.4	62016708	-1.1	0.9751	TRUE	2.37	2.28	2.48	5274659	-1.7	0.9803	TRUE	2.43	2.35	2.55	3322198	-0.9	0.9713	TRUE	2.46	2.13	2.67	4918601	-0.1	0.9483	TRUE
sp|P02666|CASB_BOVIN	PIQ	358.1973+	1	358.197	PIQ[+1]															3.35	3.28	3.41	1175730	-0.9	0.8971	ALIGNED	3.37	3.3	3.48	2744835	-0.4	0.9681	TRUE	3.45	3.39	3.6	2320329	-1.4	0.9676	ALIGNED	3.45	3.36	3.56	889019	-1.2	0.879	ALIGNED
sp|P02666|CASB_BOVIN	PIQA	428.2504+	1	428.25	PIQA	10.11	10.04	10.21	141540480	-0.7	0.9802	TRUE	10.09	10.02	10.19	132340800	-1.1	0.9718	TRUE	10.11	9.98	10.22	121065400	-0.4	0.9642	TRUE	10.18	10.1	10.32	88015	-1.7	0.8752	ALIGNED	9.96	9.87	10.12	3133296	-2.7	0.9294	ALIGNED	5.05	4.98	5.17	2515861	-0.7	0.9729	TRUE
sp|P02666|CASB_BOVIN	FLL	392.2544+	1	392.254	FLL	15.75	15.54	15.92	358874432	0.5	0.9862	ALIGNED	15.74	15.67	15.89	250820400	0.2	0.9864	TRUE	15.73	15.5	15.88	44976668	1.1	0.9801	ALIGNED	15.77	15.64	15.95	70511104	1	0.9888	TRUE	15.79	15.66	15.97	97077304	0.8	0.988	TRUE	15.74	15.63	15.92	341338784	0	0.9899	TRUE
sp|P02666|CASB_BOVIN	LLY	408.2493+	1	408.249	LLY	10.81	10.7	10.91	57110432	-0.3	0.9703	ALIGNED	10.77	10.69	10.89	66399668	-0.5	0.9741	TRUE	10.8	10.67	10.92	22789658	-0.2	0.9683	ALIGNED								10.89	10.65	11.03	1179397	-2.1	0.8065	ALIGNED	10.87	10.74	11.03	9174862	-0.5	0.9761	ALIGNED
sp|P02666|CASB_BOVIN	LYQEPVLGPV	1114.6143+	1	1114.61	LYQEPVLGPV	15.44	15.37	15.58	261187056	0	0.9942	TRUE	15.44	15.37	15.57	263480848	-0.7	0.9971	TRUE	15.39	15.31	15.5	84984664	0.4	0.9955	TRUE
sp|P02666|CASB_BOVIN	LYQEPVLGPV	557.8108++	2	557.811	LYQEPVLGPV	15.46	15.37	15.58	584571904	-0.6	0.9879	TRUE	15.44	15.37	15.57	570251776	-1.1	0.9915	TRUE	15.39	15.31	15.5	190424240	-0.2	0.9954	TRUE															15.27	15.19	15.37	461092	3.6	0.9516	ALIGNED
sp|P02666|CASB_BOVIN	LYQEPV	748.3876+	1	748.388	LYQEPV	9.42	9.32	9.53	107161624	-0.4	0.9887	TRUE	9.41	9.31	9.53	104818664	-0.8	0.9853	TRUE	9.42	9.31	9.5	62735320	-0.7	0.9888	TRUE															9.44	9.36	9.52	168442	0.8	0.8212	ALIGNED
sp|P02666|CASB_BOVIN	LYQEPVLGPVR	635.8613++	2	635.861	LYQEPVLGPVR	12.74	12.6	12.9	20368454	1.3	0.9866	TRUE	12.72	12.61	12.89	22166582	1.2	0.9908	ALIGNED	12.67	12.54	12.88	12309224	4.5	0.9864	ALIGNED
sp|P02666|CASB_BOVIN	YQEPVLGPV	1001.5302+	1	1001.53	YQEPVLGPV	14.2	14.1	14.35	7143087616	-1.6	0.9944	TRUE	14.15	14.07	14.34	7669188608	-2.1	0.9959	TRUE	14.12	14.05	14.3	5407593984	-1.2	0.994	TRUE	14.17	14.06	14.29	128572	2.5	0.9457	ALIGNED	14.16	14.06	14.26	629322	2.9	0.9566	TRUE
sp|P02666|CASB_BOVIN	YQEPVLGPV	501.2687++	2	501.269	YQEPVLGPV	14.18	14.1	14.35	4666514944	-1.2	0.9935	TRUE	14.15	14.07	14.34	4798315008	-1.9	0.9966	TRUE	14.12	14.05	14.3	4110498048	-0.8	0.9963	TRUE	14.18	14.06	14.29	817264	3	0.9489	ALIGNED	14.16	14.06	14.26	3153376	3.1	0.9889	TRUE	14.11	14.01	14.22	1675967	3.3	0.9666	ALIGNED
sp|P02666|CASB_BOVIN	YQEPVLGPVRGPFPI	834.9590++	2	834.959	YQEPVLGPVRGPFPI	18.82	18.72	19.02	115260064	-0.7	0.9935	TRUE	18.84	18.7	18.99	110001936	-1	0.9922	TRUE	18.73	18.61	18.9	54077636	-0.5	0.9951	TRUE	18.64	18.55	18.73	78829	3	0.9193	ALIGNED	18.65	18.52	18.77	97474	4.4	0.8903	ALIGNED	18.57	18.37	18.68	627980	3.9	0.9888	ALIGNED
sp|P02666|CASB_BOVIN	YQEPVLGPVRGPFPI	556.9751+++	3	556.975	YQEPVLGPVRGPFPI	18.82	18.72	19.02	63828844	-0.8	0.9916	TRUE	18.84	18.7	18.99	57882920	-0.9	0.9886	TRUE	18.77	18.61	18.9	29354624	-0.8	0.9854	TRUE	18.62	18.55	18.73	79506	3.1	0.9171	ALIGNED	18.61	18.52	18.77	111404	4.3	0.9538	ALIGNED	18.56	18.37	18.68	694466	2.3	0.9997	ALIGNED
sp|P02666|CASB_BOVIN	YQEPV	635.3035+	1	635.304	YQEPV	7.5	7.4	7.61	2614187520	-0.7	0.995	TRUE	7.49	7.39	7.6	3007434240	-0.7	0.9951	TRUE	7.48	7.39	7.6	2644347392	-0.6	0.9947	TRUE	7.53	7.44	7.65	607271	1.5	0.9649	ALIGNED	7.54	7.45	7.64	2767630	-0.2	0.9791	ALIGNED	7.53	7.45	7.68	4892017	-1.1	0.9889	TRUE
sp|P02666|CASB_BOVIN	YQEPVLG	805.4090+	1	805.409	YQEPVLG	10.96	10.88	11.05	852514048	-0.8	0.9894	TRUE	10.92	10.85	11.05	845964416	-1	0.9894	TRUE	10.92	10.85	11.04	633340736	-0.6	0.9926	TRUE
sp|P02666|CASB_BOVIN	YQEPVLG	403.2082++	2	403.208	YQEPVLG	10.94	10.88	11.05	288492480	-0.2	0.9886	TRUE	10.92	10.85	11.05	297778592	-0.4	0.9908	TRUE	10.93	10.85	11.04	288103520	-0.2	0.9909	TRUE	10.95	10.87	11.02	41644	0.4	0.9378	ALIGNED	10.95	10.82	10.96	79111	0.8	0.8946	ALIGNED	10.93	10.89	10.99	260214	2.8	0.9873	ALIGNED
sp|P02666|CASB_BOVIN	YQEP	537.2191+	1	537.219	YQ[+1]EP																						6.04	5.99	6.12	123390	0.6	0.8561	ALIGNED	6.07	6.01	6.17	749585	-1.7	0.8516	ALIGNED	6.07	5.95	6.21	2643208	0	0.9885	TRUE
sp|P02666|CASB_BOVIN	YQEPVLGPVR	1157.6313+	1	1157.63	YQEPVLGPVR	11.56	11.46	11.71	42861472	0.5	0.9895	TRUE	11.55	11.45	11.68	35551020	0.2	0.9943	TRUE	11.53	11.41	11.67	21531394	0.4	0.9832	TRUE
sp|P02666|CASB_BOVIN	YQEPVLGPVR	579.3193++	2	579.319	YQEPVLGPVR	11.57	11.46	11.71	434142496	-0.8	0.9947	TRUE	11.55	11.45	11.68	379628992	-1.2	0.9994	TRUE	11.53	11.41	11.67	282748128	-1	0.9912	TRUE	11.54	11.45	11.61	221253	-2	0.8552	ALIGNED	11.53	11.44	11.6	422290	-1.3	0.914	ALIGNED	11.5	11.41	11.6	1864655	-0.9	0.9611	ALIGNED
sp|P02666|CASB_BOVIN	YQEPVLGPVRGPFPIIV	941.0353++	2	941.035	YQEPVLGPVRGPFPIIV	21.23	21.13	21.35	24634858	-1.3	0.9953	TRUE	21.21	21.06	21.34	28693076	-1.7	0.9846	TRUE	21.09	21	21.2	18486540	-1	0.9838	TRUE	20.87	20.78	21	344220	2.7	0.9844	ALIGNED	20.85	20.76	21	222948	4.6	0.9966	ALIGNED	20.8	20.67	20.94	489403	4.2	0.9887	ALIGNED
sp|P02666|CASB_BOVIN	QEPV	472.2402+	1	472.24	QEPV	4.37	4.24	4.52	547660416	0.1	0.9789	ALIGNED	4.36	4.23	4.53	569929856	-0.5	0.9821	TRUE	4.37	4.25	4.53	622913216	-0.2	0.9813	ALIGNED	4.44	4.37	4.53	186769	0.8	0.9829	ALIGNED								4.5	4.34	4.72	1229750	1	0.9891	ALIGNED
sp|P02666|CASB_BOVIN	QEPVLGPVR	497.7876++	2	497.788	QEPVLGPVR	9.93	9.84	10.06	102551688	-0.1	0.9808	TRUE	9.92	9.82	10.04	87373520	-0.6	0.9828	TRUE	9.92	9.83	10.09	65493208	0.2	0.9892	TRUE	10.01	9.87	10.08	149498	2.4	0.9584	ALIGNED
sp|P02666|CASB_BOVIN	QEPVLGPVRGPFPIIV	859.5036++	2	859.504	QEPVLGPVRGPFPIIV	20.88	20.74	21.03	8785657	3	0.9949	TRUE	20.86	20.71	21.03	12032106	2.7	0.9951	TRUE	20.76	20.63	20.93	7667503	4	0.996	TRUE								20.42	20.31	20.49	40083	3.4	0.9462	ALIGNED	20.34	20.21	20.54	447361	2.4	0.9882	ALIGNED
sp|P02666|CASB_BOVIN	QEPVLGPVRGPFPI	753.4274++	2	753.427	QEPVLGPVRGPFPI	18.26	18.13	18.46	43609672	-1	0.9853	TRUE	18.26	18.13	18.4	44282036	-1	0.9912	TRUE	18.18	18.03	18.32	26393552	0.3	0.9769	TRUE								18.05	17.92	18.12	71944	3.6	0.8384	ALIGNED	17.97	17.84	18.1	633364	2.8	0.9606	ALIGNED
sp|P02666|CASB_BOVIN	QEPVLGPV	838.4669+	1	838.467	QEPVLGPV	12.92	12.83	13.09	2301876480	-1	0.9936	TRUE	12.91	12.82	13.08	2183405824	-1.7	0.9933	TRUE	12.89	12.79	13.04	1392094336	-1.1	0.9932	TRUE
sp|P02666|CASB_BOVIN	QEPVLGPV	419.7371++	2	419.737	QEPVLGPV	12.95	12.83	13.09	1141078528	-0.8	0.9922	TRUE	12.91	12.82	13.08	1127039872	-1.3	0.996	TRUE	12.89	12.79	13.04	766433152	-0.8	0.9956	TRUE	12.88	12.75	12.9	37762	3.9	0.9088	ALIGNED	12.87	12.78	12.98	76145	2.5	0.9141	ALIGNED	12.85	12.64	13.04	301515	2.3	0.9827	ALIGNED
sp|P02666|CASB_BOVIN	EPVLGPV	710.4083+	1	710.408	EPVLGPV	12.84	12.74	13.04	171673808	0	0.9868	TRUE	12.85	12.74	13.02	102486304	-0.7	0.9799	TRUE	12.82	12.71	12.98	86647016	0	0.9809	ALIGNED	12.79	12.7	12.99	319242	1.7	0.8308	ALIGNED	12.81	12.63	12.99	566679	-0.4	0.8043	ALIGNED	12.78	12.67	13.01	1871743	1.1	0.9478	ALIGNED
sp|P02666|CASB_BOVIN	EPVLGPVRGPFPI	689.3981++	2	689.398	EPVLGPVRGPFPI																						18.13	18.02	18.31	2217217	2	0.9939	TRUE								18.08	17.9	18.3	4007006	1.7	0.9862	ALIGNED
sp|P02666|CASB_BOVIN	EPVLGPVRGPFP	632.8561++	2	632.856	EPVLGPVRGPFP	15.97	15.92	16	515197	2.2	0.9648	ALIGNED	15.98	15.87	16.1	2018819	2.6	0.8196	ALIGNED	15.91	15.83	16.18	3524689	4	0.9304	ALIGNED	15.77	15.53	16.11	7061889	1.3	0.9631	TRUE	15.73	15.49	16.23	5703305	2.7	0.9718	TRUE	15.7	15.42	16.19	8934001	1.5	0.9879	TRUE
sp|P02666|CASB_BOVIN	PVL	328.2231+	1	328.223	PVL	8.61	8.52	8.73	554145088	0.6	0.9575	ALIGNED	8.6	8.5	8.72	539243968	-0.1	0.9646	ALIGNED	8.61	8.53	8.76	470843648	0.2	0.9587	ALIGNED	8.62	8.51	8.76	23484106	-0.2	0.9887	TRUE	8.69	8.58	8.84	34538080	-1.2	0.9803	ALIGNED	8.69	8.6	8.84	6784242	-1.6	0.9733	ALIGNED
sp|P02666|CASB_BOVIN	PVLGPV	581.3657+	1	581.366	PVLGPV	12.33	12.24	12.47	8685876224	-0.4	0.9925	TRUE	12.3	12.23	12.46	8521916928	-0.9	0.9933	TRUE	12.28	12.2	12.42	7878376960	-0.6	0.9924	TRUE	12.28	12.21	12.41	252236	2.1	0.9478	ALIGNED	12.3	12.21	12.52	569729	1.7	0.9596	ALIGNED	12.28	12.19	12.35	403707	0.5	0.9139	ALIGNED
sp|P02666|CASB_BOVIN	PVLGPV	291.1865++	2	291.187	PVLGPV	12.33	12.24	12.47	551168320	-0.9	0.9829	TRUE	12.32	12.23	12.46	516043584	-1.4	0.9809	TRUE	12.29	12.2	12.42	511301120	-1.1	0.9854	TRUE	12.26	12.21	12.41	15935	2.1	0.8565	ALIGNED	12.3	12.21	12.52	51794	2.4	0.835	ALIGNED
sp|P02666|CASB_BOVIN	PVLG	385.2445+	1	385.245	PVLG	7.18	7.1	7.3	149267008	-1.3	0.9778	ALIGNED	7.17	7.09	7.29	145945952	-1.7	0.9795	TRUE	7.22	7.12	7.31	142634032	-1.7	0.9758	TRUE								7.56	7.2	7.79	3977391	-0.3	0.886	ALIGNED	7.27	7.15	7.35	81526	1	0.8959	ALIGNED
sp|P02666|CASB_BOVIN	PVLGPVRGPFPI	624.8768++	2	624.877	PVLGPVRGPFPI	18.19	18.04	18.43	234573952	-0.7	0.9935	TRUE	18.18	18.01	18.4	214990000	-0.8	0.9931	TRUE	18.13	17.94	18.31	124909760	-0.1	0.9951	TRUE	17.98	17.86	18.13	527003	1.5	0.9755	ALIGNED	17.96	17.85	18.16	457632	3.8	0.9808	ALIGNED	17.93	17.81	18.08	324827	0.5	0.9934	ALIGNED
sp|P02666|CASB_BOVIN	PVLGPVR	737.4668+	1	737.467	PVLGPVR	9.01	8.93	9.14	46249312	-0.3	0.9836	TRUE	9	8.91	9.11	35172120	-0.4	0.9777	TRUE	9.06	8.95	9.16	24285102	-0.3	0.9907	TRUE
sp|P02666|CASB_BOVIN	PVLGPVR	369.2371++	2	369.237	PVLGPVR	9.01	8.93	9.14	217885360	-0.3	0.9865	TRUE	9	8.91	9.11	179495376	-0.4	0.9894	TRUE	9.03	8.95	9.16	138993472	-0.1	0.9908	TRUE	9.06	8.97	9.15	1116322	1.5	0.9824	TRUE	9.11	9	9.26	2164749	0.7	0.9847	TRUE	9.09	8.99	9.22	519122	-0.6	0.95	ALIGNED
sp|P02666|CASB_BOVIN	PVLGPVRGPFPIIV	730.9530++	2	730.953	PVLGPVRGPFPIIV	21.03	20.86	21.17	46455416	2.8	0.9905	TRUE	21.01	20.82	21.18	52161352	2	0.9951	TRUE	20.93	20.77	21.03	25500264	-0.3	0.9833	TRUE	20.83	20.72	20.96	7101	-1.7	0.8777	ALIGNED
sp|P02666|CASB_BOVIN	PVLGPVRGPFPIIV	487.6378+++	3	487.638	PVLGPVRGPFPIIV	21.01	20.86	21.17	5087713	2.8	0.9906	TRUE	21.01	20.82	21.18	5774517	2.3	0.9946	TRUE	20.96	20.77	21.03	2437280	-0.1	0.9572	TRUE
sp|P02666|CASB_BOVIN	VLGPV	484.3130+	1	484.313	VLGPV	10.18	10.1	10.26	26596730	-0.1	0.8747	ALIGNED	10.17	10.1	10.27	22380774	-1	0.9512	ALIGNED	10.18	10.12	10.3	45306100	0	0.9476	TRUE	10.22	10.15	10.32	382828	-0.3	0.9508	ALIGNED	10.25	10.16	10.36	1395076	1.3	0.9512	ALIGNED	10.25	10.15	10.36	6420485	0.2	0.9795	TRUE
sp|P02666|CASB_BOVIN	VLGPVRGPFP	519.8084++	2	519.808	VLGPVRGPFP																						14.38	14.13	14.78	3782619	2.3	0.9758	ALIGNED	14.41	14.14	14.78	3647890	2.9	0.9795	TRUE	14.37	14.14	14.8	15688904	1	0.9618	TRUE
sp|P02666|CASB_BOVIN	VLGPVR	320.7107++	2	320.711	VLGPVR																						7.37	7.21	7.5	1971362	-1.3	0.9049	ALIGNED	7.43	7.33	7.67	4027331	-1.5	0.9252	TRUE	7.42	7.32	7.52	7387236	-1.2	0.9808	TRUE
sp|P02666|CASB_BOVIN	LGP	286.1761+	1	286.176	LGP	6.86	6.79	6.88	3759319	-0.7	0.9686	ALIGNED								6.91	6.7	7.25	13282327	-1.2	0.9531	ALIGNED	6.89	6.81	7.91	10779371	-0.8	0.9793	TRUE	6.97	6.87	7.94	70953728	-1.1	0.987	TRUE	6.98	6.89	7.32	4751348	-1.1	0.9722	TRUE
sp|P02666|CASB_BOVIN	LGPVRGPFPI	526.8162++	2	526.816	LGPVRGPFPI	16.7	16.56	17.03	119768808	0.9	0.9926	TRUE	16.71	16.45	16.9	107907416	0.5	0.9926	TRUE	16.65	16.38	16.85	84919696	1.1	0.9911	TRUE	16.56	16.45	16.65	72286	1.3	0.8551	ALIGNED								16.5	16.32	16.72	1873867	2.3	0.9729	ALIGNED
sp|P02666|CASB_BOVIN	LGPVR	271.1765++	2	271.176	LGPVR	5.98	5.84	6.15	26485170	-0.4	0.9333	TRUE	5.97	5.83	6.14	21231902	-0.9	0.9536	TRUE	5.99	5.86	6.14	19838810	-0.6	0.9543	TRUE								6.04	5.98	6.19	328773	-1.6	0.8389	ALIGNED	6.06	5.96	6.21	1747345	-0.7	0.9561	ALIGNED
sp|P02666|CASB_BOVIN	LGPVRGPFPIIV	632.8924++	2	632.892	LGPVRGPFPIIV	19.66	19.49	19.86	13601325	0	0.987	TRUE	21.17	20.97	21.29	12360641	-0.4	0.9288	TRUE	19.52	19.38	19.72	13068761	0.3	0.9914	TRUE								19.08	18.86	19.26	435876	3.3	0.9874	ALIGNED	19.34	19.22	19.56	951450	3.9	0.9885	ALIGNED
sp|P02666|CASB_BOVIN	GPVRGPFP	413.7321++	2	413.732	GPVRGPFP	11.34	11.24	11.76	12622836	0.5	0.9502	ALIGNED	11.35	11.25	11.47	5428580	2	0.8663	ALIGNED	11.36	11.21	11.54	9013833	0.3	0.9378	ALIGNED	11.3	11.09	11.56	44401396	-0.2	0.993	TRUE	11.37	11.14	11.73	66147212	-0.5	0.9889	TRUE	11.33	11.08	11.75	42095484	-1.2	0.9864	TRUE
sp|P02666|CASB_BOVIN	GPVRGPFPII	526.8162++	2	526.816	GPVRGPFPII	17.34	17.15	17.5	197141936	0	0.9858	TRUE	17.33	17.13	17.47	150120448	-0.1	0.9952	TRUE	17.23	17.1	17.41	6109989	0.7	0.9764	ALIGNED	17.14	16.94	17.28	3816066	2.3	0.9857	TRUE	17.14	16.98	17.45	6479842	1.2	0.9915	ALIGNED	17.1	16.9	17.36	16143255	2.2	0.9883	TRUE
sp|P02666|CASB_BOVIN	GPVR	214.6344++	2	214.634	GPVR	1.15	1.09	1.32	19202256	-1.1	0.9093	TRUE	1.14	1.08	1.3	10757319	-1.5	0.893	ALIGNED	1.14	1.09	1.29	9615003	-0.7	0.877	ALIGNED	1.45	1.33	1.61	1151619	0.2	0.8853	ALIGNED	1.52	1.34	1.64	725851	2.1	0.9536	ALIGNED	1.37	1.33	1.57	564944	1.3	0.9355	ALIGNED
sp|P02666|CASB_BOVIN	GPVRGPF	365.2058++	2	365.206	GPVRGPF	10.08	9.98	10.22	23367208	-0.6	0.8913	ALIGNED															10.22	10.06	10.46	3925493	0.4	0.9814	TRUE	10.26	10.12	10.48	4219544	0.5	0.9772	TRUE	10.27	10.09	10.42	1267417	-1	0.9339	ALIGNED
sp|P02666|CASB_BOVIN	GPVRGPFPIIV	576.3504++	2	576.35	GPVRGPFPIIV	18.28	18.13	18.55	119706000	-0.7	0.9932	TRUE	18.27	18.1	18.53	123598920	-0.8	0.989	TRUE	18.18	18	18.49	85385520	0.3	0.9939	TRUE	18.09	17.91	18.25	4188425	1.4	0.9876	ALIGNED	18.1	17.92	18.32	9443845	1.8	0.9889	ALIGNED	18.04	17.84	18.28	17077154	2	0.9903	TRUE
sp|P02666|CASB_BOVIN	GPVRGPFPI	939.5411+	1	939.541	GPVRGPFPI	14.76	14.56	14.99	330027712	-0.2	0.9922	TRUE	14.72	14.54	14.97	226170240	-0.4	0.9921	TRUE	14.73	14.51	14.92	197866352	0.4	0.99	TRUE	14.72	14.56	14.91	215198	2.3	0.9758	TRUE								14.76	14.76	14.85	159358	1.8	0.8225	TRUE
sp|P02666|CASB_BOVIN	GPVRGPFPI	470.2742++	2	470.274	GPVRGPFPI	14.76	14.56	14.99	2554053888	0.3	0.9942	TRUE	14.72	14.54	14.97	1903422720	-0.1	0.9955	TRUE	14.7	14.51	14.92	1922477824	0.7	0.9946	TRUE	14.72	14.56	14.91	21332218	1.9	0.9837	TRUE	14.77	14.59	15.05	27018798	1.9	0.9968	TRUE
sp|P02666|CASB_BOVIN	PVRGPFPI	441.7634++	2	441.763	PVRGPFPI	14.62	14.45	14.79	218612400	-0.2	0.9905	TRUE	14.58	14.41	14.81	165899312	-0.6	0.9876	TRUE	14.56	14.36	14.75	134729472	-0.3	0.988	TRUE
sp|P02666|CASB_BOVIN	PVRGPFPIIV	547.8397++	2	547.84	PVRGPFPIIV	18.28	18.11	18.47	30203988	-0.2	0.989	TRUE	18.27	18.09	18.41	32463974	-0.4	0.9867	TRUE	18.18	18.02	18.36	19517480	0.8	0.9767	TRUE	18.07	17.96	18.33	321066	2.6	0.9571	ALIGNED	18.12	17.88	18.28	876676	2.1	0.9818	ALIGNED	18.03	17.81	18.19	1976551	2	0.9872	ALIGNED
sp|P02666|CASB_BOVIN	VRGPFPIIV	499.3133++	2	499.313	VRGPFPIIV	17.91	17.73	17.97	1222447	-0.6	0.8041	ALIGNED	17.84	17.71	17.95	1511468	0.1	0.834	ALIGNED								17.73	17.55	17.89	1268351	1.7	0.9735	ALIGNED	17.76	17.54	17.98	4279949	1.1	0.9876	TRUE	17.72	17.52	17.95	7984731	-0.2	0.9921	TRUE
sp|P02666|CASB_BOVIN	VRGPFPI	393.2371++	2	393.237	VRGPFPI	14.14	13.98	14.25	22752152	-0.7	0.9858	ALIGNED	14.1	13.96	14.21	17365326	-0.8	0.9618	ALIGNED	14.09	13.93	14.3	27338572	-0.5	0.9791	TRUE	14.13	13.91	14.35	1541220	1.8	0.9764	ALIGNED	14.2	13.98	14.47	4622859	2.7	0.9763	TRUE	14.16	13.98	14.36	7510575	1.2	0.9815	TRUE
sp|P02666|CASB_BOVIN	VRGPFP	336.6950++	2	336.695	VRGPFP																						10.37	10.1	10.59	2609153	-0.5	0.9756	TRUE	10.4	10.17	10.7	12966715	-0.6	0.9892	TRUE	10.4	10.17	10.65	25666316	-1.7	0.9341	TRUE
sp|P02666|CASB_BOVIN	RGPF	476.2616+	1	476.262	RGPF	6.72	6.34	6.74	29734154	-0.3	0.9693	TRUE	6.79	6.63	6.86	85787096	-1.4	0.9413	TRUE	6.77	6.66	6.93	102713176	-0.8	0.9661	TRUE															6.91	6.83	7.01	714442	-0.9	0.9316	ALIGNED
sp|P02666|CASB_BOVIN	RGPFPII	799.4825+	1	799.482	RGPFPII	16.15	15.98	16.28	195130864	-1	0.9873	TRUE	16.13	15.96	16.27	185221280	-2.2	0.9881	TRUE	16.05	15.89	16.19	11667322	-2.7	0.9924	ALIGNED
sp|P02666|CASB_BOVIN	RGPFPII	400.2449++	2	400.245	RGPFPII	16.15	15.98	16.28	312240608	-0.2	0.9839	TRUE	16.14	15.96	16.27	301490816	-1.1	0.9825	TRUE	16.08	15.89	16.19	18084276	0.8	0.9855	ALIGNED
sp|P02666|CASB_BOVIN	RGPFPIIV	449.7791++	2	449.779	RGPFPIIV	17.21	17.04	17.39	250091360	0.2	0.9889	TRUE	17.18	17.03	17.48	223228016	-0.1	0.9935	TRUE	17.13	16.96	17.41	93698792	0.4	0.99	TRUE	17.03	16.94	17.25	186907	2.4	0.9453	ALIGNED	16.76	16.54	16.94	2030769	5	0.9839	ALIGNED	17	16.89	17.2	1772328	3.3	0.9811	ALIGNED
sp|P02666|CASB_BOVIN	RGPFPI	686.3984+	1	686.398	RGPFPI	13.21	13.06	13.42	2425764864	-0.6	0.9923	TRUE	13.2	13.04	13.41	2191004416	-0.7	0.9936	TRUE	13.14	13.01	13.41	2747023872	-0.5	0.9918	TRUE
sp|P02666|CASB_BOVIN	RGPFPI	343.7028++	2	343.703	RGPFPI	13.21	13.06	13.42	3896287232	-0.4	0.9929	TRUE	13.19	13.04	13.41	3447275776	-0.5	0.9946	TRUE	13.15	13.01	13.41	4824306176	-0.2	0.994	TRUE	13.14	13.05	13.36	109749	2.5	0.9166	ALIGNED	13.23	13.08	13.33	128221	2.4	0.8369	ALIGNED	13.17	12.86	13.29	559046	2.2	0.9769	ALIGNED
sp|P02666|CASB_BOVIN	GPFPII	643.3814+	1	643.381	GPFPII	18.38	18.24	18.54	5914776576	-1	0.9939	TRUE	18.35	18.23	18.51	6637978624	-1.4	0.9948	TRUE	18.31	18.18	18.44	1176548352	-1.1	0.9928	TRUE	18.26	18.07	18.42	2782594	0.4	0.9746	ALIGNED	18.22	18.09	18.38	8124725	-0.3	0.9862	TRUE	18.17	18.05	18.34	9300717	0.7	0.9906	ALIGNED
sp|P02666|CASB_BOVIN	GPFPII	322.1943++	2	322.194	GPFPII	18.34	18.24	18.54	680418624	-1.3	0.9919	TRUE	18.34	18.23	18.51	718573632	-1.7	0.9919	TRUE	18.29	18.18	18.44	135737440	-1.1	0.9906	TRUE								18.22	18.09	18.38	1435754	-0.7	0.9858	TRUE	18.17	18.05	18.34	1687020	-0.2	0.9911	ALIGNED
sp|P02666|CASB_BOVIN	GPFPIIV	742.4498+	1	742.45	GPFPIIV	19.49	19.37	19.66	3487313152	-1.1	0.9961	TRUE	19.45	19.36	19.65	3362991872	-1	0.996	TRUE	19.37	19.27	19.56	1243702912	0.3	0.9951	ALIGNED	19.31	19.21	19.5	922232	2	0.9904	ALIGNED	19.29	19.2	19.43	4517104	4.4	0.9939	ALIGNED	19.24	19.11	19.38	6425234	4.4	0.9911	ALIGNED
sp|P02666|CASB_BOVIN	GPFPIIV	371.7285++	2	371.729	GPFPIIV	19.47	19.37	19.66	767438976	-1.2	0.9915	TRUE	19.46	19.36	19.65	758731776	-1.3	0.9954	TRUE	19.37	19.27	19.56	294854720	-0.1	0.9933	ALIGNED	19.31	19.21	19.5	489142	2.5	0.954	ALIGNED	19.29	19.2	19.43	2089104	3.5	0.9955	ALIGNED	19.24	19.11	19.38	2994364	3.5	0.9915	ALIGNED
sp|P02666|CASB_BOVIN	GPFP	417.2132+	1	417.213	GPFP	10.58	10.13	11.22	180648800	-0.4	0.9761	ALIGNED	10.68	10.68	10.93	15332556	0	0.9565	ALIGNED	10.64	10.64	10.8	8654748	0.4	0.9533	ALIGNED	10.55	10.28	11.33	14679593	0.9	0.9667	TRUE	10.59	10.32	11.39	31927968	0.7	0.9726	ALIGNED	10.56	10.28	11.35	8022386	0.2	0.951	ALIGNED
sp|P02666|CASB_BOVIN	PFPI	473.2758+	1	473.276	PFPI	20.54	20.35	20.87	32090642	-0.7	0.9624	TRUE	14.27	14.14	14.51	89882072	-0.6	0.9243	TRUE	14.26	14.12	14.45	108661216	-0.3	0.9469	TRUE	16.14	15.81	16.55	2125176	0.4	0.9333	ALIGNED	16.14	15.94	16.54	8874225	0.3	0.9779	TRUE	16.11	15.94	16.5	4424782	0.7	0.9478	TRUE
sp|P02666|CASB_BOVIN	FPIIV	588.3756+	1	588.376	FPIIV	17.9	17.76	18.13	299729056	-1.3	0.9925	TRUE	17.93	17.74	18.25	318623520	-1.5	0.99	TRUE	17.83	17.67	18.18	150709776	-1	0.9886	TRUE	17.78	17.63	17.96	1920909	1.5	0.9967	ALIGNED	17.76	17.59	17.99	5752573	1.8	0.9879	ALIGNED	17.72	17.54	18.01	5604327	0.3	0.971	ALIGNED
sp|P02666|CASB_BOVIN	PII	342.2387+	1	342.239	PII								18.34	18.17	18.53	27183138	-1.6	0.9474	ALIGNED	18.31	18.12	18.42	4943133	-0.8	0.9568	ALIGNED															18.13	17.89	18.34	1867611	0.1	0.9712	TRUE
sp|P02666|CASB_BOVIN	IIV	344.2544+	1	344.254	IIV	10.77	10.7	10.91	149230288	-0.6	0.9803	TRUE	10.74	10.69	10.88	168825088	-0.9	0.9777	TRUE	10.78	10.71	10.91	122863808	-0.5	0.983	TRUE	9.87	9.76	9.98	473459	-0.9	0.903	ALIGNED	10.76	10.64	10.86	99279	0.4	0.8697	ALIGNED	9.89	9.81	10.04	1700740	-0.5	0.9588	ALIGNED
sp|P02668|CASK_BOVIN	EQNQEQPI	985.4585+	1	985.459	EQNQEQPI	6.88	6.79	6.97	31583156	-0.4	0.9898	TRUE	6.88	6.78	6.96	8938982	-1.8	0.9734	ALIGNED	6.89	6.81	6.96	3358227	-0.9	0.9534	ALIGNED
sp|P02668|CASK_BOVIN	QNQEQPIR	506.7622++	2	506.762	QNQEQPIR	12.62	12.52	12.79	65346724	-3.2	0.9877	ALIGNED	12.61	12.48	12.75	57026748	-3.8	0.9833	TRUE	12.59	12.4	12.76	24949464	-2.7	0.9846	ALIGNED	12.6	12.47	12.71	112351	-2.5	0.9866	ALIGNED	12.59	12.53	12.66	242719	-2.7	0.9283	ALIGNED	12.59	12.48	12.74	881368	-4.5	0.9647	ALIGNED
sp|P02668|CASK_BOVIN	QNQE	520.1885+	1	520.189	Q[+1]NQ[+1]E																						0.94	0.71	1.07	4897783	-0.1	0.983	TRUE	0.98	0.93	1.03	20716748	-0.8	0.984	ALIGNED	0.98	0.94	1.09	93406	0	0.8311	ALIGNED
sp|P02668|CASK_BOVIN	NQEQPI	728.3573+	1	728.357	NQEQPI	6.64	6.51	6.72	19240898	0.2	0.9591	TRUE	6.63	6.5	6.72	20323324	-1	0.9232	TRUE	6.64	6.53	6.77	15670399	0.6	0.9865	TRUE
sp|P02668|CASK_BOVIN	QEQPI	614.3144+	1	614.314	QEQPI	6.41	6.32	6.58	55754780	-1.9	0.9233	TRUE	6.4	6.33	6.57	62519092	-2.1	0.9391	TRUE	6.42	6.34	6.58	74581456	-1.7	0.9637	ALIGNED
sp|P02668|CASK_BOVIN	EQPIR	642.3570+	1	642.357	EQPIR	3.59	3.52	3.72	5503586	-1	0.9401	ALIGNED	3.59	3.46	3.66	2303230	-2.1	0.9579	ALIGNED								3.62	3.56	3.74	3531629	-0.4	0.9891	TRUE	3.71	3.6	3.82	13377058	-1.4	0.989	TRUE
sp|P02668|CASK_BOVIN	EQPIR	321.6821++	2	321.682	EQPIR																						3.62	3.56	3.74	13701326	-0.8	0.9862	TRUE	3.71	3.6	3.82	22334348	-1.6	0.9847	TRUE	3.72	3.54	3.81	1287319	1	0.9519	ALIGNED
sp|P02668|CASK_BOVIN	EKDERF	412.2009++	2	412.201	EKDERF																						4.34	4.26	4.48	5897967	-1.1	0.9853	ALIGNED	4.42	4.27	4.58	4073842	-1.6	0.9829	TRUE	4.44	4.34	4.54	266127	-0.8	0.9348	ALIGNED
sp|P02668|CASK_BOVIN	DER	419.1885+	1	419.188	DER	0.57	0.54	0.66	190571088	-2.1	0.978	TRUE	0.57	0.54	0.66	227376848	-2	0.9802	TRUE	0.57	0.53	0.67	59402804	-2.2	0.9673	TRUE
sp|P02668|CASK_BOVIN	DERF	283.6321++	2	283.632	DERF	5.79	5.72	5.9	12778373	0.5	0.9806	TRUE	5.79	5.7	5.89	14229053	0.3	0.978	TRUE	5.81	5.76	5.88	146873	0.1	0.8346	ALIGNED	5.85	5.76	5.97	22731384	-0.3	0.9921	TRUE	5.9	5.81	6.03	20128138	0.4	0.9863	TRUE	5.9	5.8	6.08	1539473	-0.4	0.9794	ALIGNED
sp|P02668|CASK_BOVIN	ERF	451.2300+	1	451.23	ERF	3.35	3.26	3.5	76868056	-1	0.9708	TRUE	3.33	3.26	3.48	74763752	-1.2	0.9661	ALIGNED	3.38	3.31	3.49	48902508	-0.7	0.9709	ALIGNED
sp|P02668|CASK_BOVIN	FFSDK	643.3086+	1	643.309	FFSDK	7.23	7.14	7.32	48811048	-0.2	0.9884	TRUE	7.22	7.13	7.33	51743420	-0.7	0.9896	TRUE	7.23	7.16	7.33	3849957	-1.8	0.9236	TRUE
sp|P02668|CASK_BOVIN	FFSDK	322.1579++	2	322.158	FFSDK	7.23	7.14	7.32	166926112	0	0.986	TRUE	7.22	7.13	7.33	176189328	-0.5	0.987	TRUE	7.24	7.16	7.33	15515466	-0.7	0.9725	TRUE								7.3	7.19	7.33	103936	-1.2	0.9201	ALIGNED	7.32	7.24	7.4	404682	-1.3	0.9696	ALIGNED
sp|P02668|CASK_BOVIN	FSDK	496.2402+	1	496.24	FSDK	2.05	1.97	2.19	840246336	-0.8	0.987	TRUE	2.02	1.95	2.17	790004544	-0.9	0.9877	TRUE	2.05	1.98	2.2	252418432	-0.7	0.985	TRUE	2.14	2.07	2.27	163374	0.7	0.9689	ALIGNED	2.24	2.17	2.35	560828	-0.1	0.9695	ALIGNED	2.26	2.11	2.38	546218	0.1	0.9779	ALIGNED
sp|P02668|CASK_BOVIN	FSDK	248.6237++	2	248.624	FSDK	2.04	1.97	2.19	1287707648	-1.2	0.9854	TRUE	2.02	1.95	2.17	1147654528	-1.3	0.9847	TRUE	2.05	1.98	2.2	338532992	-1.5	0.9803	TRUE	2.16	2.07	2.27	401678	0.4	0.9775	ALIGNED	2.24	2.17	2.35	1186839	-1.5	0.9651	ALIGNED	2.26	2.11	2.38	1876839	-2	0.9771	ALIGNED
sp|P02668|CASK_BOVIN	FSDKIA	340.6843++	2	340.684	FSDKIA	8.11	8.06	8.2	88995008	-2	0.9768	TRUE	8.11	8.06	8.2	112514176	-2.8	0.9759	TRUE	8.14	8.08	8.22	83900616	-2.3	0.9862	TRUE								8.23	8.17	8.35	402155	-1.1	0.9559	ALIGNED	8.24	8.16	8.39	2980871	-0.8	0.9653	ALIGNED
sp|P02668|CASK_BOVIN	SDK	349.1718+	1	349.172	SDK	2.04	1.96	2.18	611752384	-1.2	0.9845	ALIGNED	2.01	1.94	2.17	561313408	-1.1	0.9856	TRUE	2.05	1.98	2.19	166673200	-0.9	0.9852	ALIGNED															2.24	2.17	2.37	875216	-1.1	0.9551	ALIGNED
sp|P02668|CASK_BOVIN	KIA	331.2340+	1	331.234	KIA	1.16	1.1	1.21	10044226	-1.4	0.9505	TRUE	1.16	1.1	1.23	10081189	-1.5	0.9581	TRUE	1.14	1.09	1.22	13589081	-1.3	0.98	TRUE															1.38	1.32	1.56	324695	1.8	0.9306	ALIGNED
sp|P02668|CASK_BOVIN	IAK	331.2340+	1	331.234	IAK	0.82	0.77	0.93	545151680	-1.4	0.9829	TRUE	0.81	0.78	0.92	429531872	-1.7	0.9859	TRUE	0.83	0.79	0.93	97986992	-1.7	0.9813	ALIGNED
sp|P02668|CASK_BOVIN	KYI	423.2602+	1	423.26	KYI	5.94	5.81	6.1	17527106	-0.2	0.9345	ALIGNED	5.91	5.77	6.07	15897645	-0.5	0.9311	TRUE
sp|P02668|CASK_BOVIN	YIPI	505.3021+	1	505.302	YIPI	12.92	12.85	13.09	8659734528	-0.4	0.9936	TRUE	12.91	12.82	13.08	8742168576	-1	0.9926	TRUE	12.89	12.8	13.06	8260835328	-0.3	0.9931	TRUE	12.93	12.66	13.06	462392	2.6	0.8197	ALIGNED								12.92	12.82	13.08	298259	4.1	0.8895	ALIGNED
sp|P02668|CASK_BOVIN	YIPIQ	633.3606+	1	633.361	YIPIQ	10.19	10.12	10.33	3525943808	-0.7	0.9931	TRUE	10.18	10.09	10.3	3628628224	-1	0.9934	TRUE	10.21	10.12	10.32	2533310464	-0.5	0.9928	TRUE
sp|P02668|CASK_BOVIN	IPIQYVL	846.4971+	1	846.497	IPIQ[+1]YVL																						18	17.57	18.02	89835	-1.8	0.8907	ALIGNED								17.9	17.74	18.04	6084529	2.2	0.9939	TRUE
sp|P02668|CASK_BOVIN	IPIQYVL	423.7522++	2	423.752	IPIQ[+1]YVL																																				17.9	17.74	18.04	5999604	1.9	0.9896	TRUE
sp|P02668|CASK_BOVIN	IPIQY	633.3606+	1	633.361	IPIQY	11.59	11.51	11.78	79150016	-0.6	0.9882	ALIGNED	11.61	11.47	11.74	70128088	-0.8	0.984	ALIGNED	11.56	11.49	11.67	8276853	-0.1	0.8449	ALIGNED	11.57	11.46	11.73	1203403	0.8	0.9816	ALIGNED	11.55	11.46	11.73	2655806	0.4	0.9742	ALIGNED	11.54	11.43	11.72	226625024	-1.2	0.9919	TRUE
sp|P02668|CASK_BOVIN	IPIQ	470.2973+	1	470.297	IPIQ	7.43	7.34	7.66	4667709952	-0.4	0.9895	TRUE	7.44	7.32	7.65	5325585408	-0.5	0.9901	TRUE	7.42	7.31	7.65	5910725632	-0.3	0.9891	TRUE	7.47	7.37	7.65	1012681	0.7	0.9421	ALIGNED	7.5	7.42	7.66	1199999	-0.2	0.9236	ALIGNED	7.52	7.41	7.65	1217817	-1.7	0.9204	ALIGNED
sp|P02668|CASK_BOVIN	IPIQ	235.6523++	2	235.652	IPIQ	7.43	7.34	7.66	129795456	-0.3	0.9727	TRUE	7.44	7.32	7.65	129531776	-0.6	0.9732	TRUE	7.42	7.31	7.65	171547248	-0.5	0.9805	TRUE	7.47	7.37	7.65	50004	1.1	0.8278	ALIGNED
sp|P02668|CASK_BOVIN	IPIQYV	732.4291+	1	732.429	IPIQYV	13.71	13.61	13.81	44586308	0.1	0.9452	TRUE	13.7	13.6	13.84	28221896	-1.3	0.8802	ALIGNED	13.64	13.57	13.85	8609552	0	0.9038	ALIGNED	13.65	13.56	13.74	114029	0.5	0.8265	ALIGNED	13.63	13.57	13.72	430231	4.3	0.8005	ALIGNED	13.59	13.46	13.69	3043721	1.4	0.9911	ALIGNED
sp|P02668|CASK_BOVIN	IPIQYV	366.7182++	2	366.718	IPIQYV	13.71	13.61	13.81	17722980	1	0.9686	TRUE	13.7	13.6	13.84	11936282	0.4	0.9896	ALIGNED	13.66	13.57	13.85	4153840	0.9	0.9572	ALIGNED	13.61	13.56	13.74	105281	-0.3	0.8435	ALIGNED								13.59	13.46	13.69	2192613	0	0.9805	ALIGNED
sp|P02668|CASK_BOVIN	IPIQY	634.3447+	1	634.345	IPIQ[+1]Y	12.11	11.98	12.19	2879275	-1.1	0.836	ALIGNED	12.08	12	12.14	2732579	-1.7	0.8842	ALIGNED								12.12	12.03	12.32	797455	0.5	0.9912	ALIGNED	12.13	12.04	12.26	1483133	0.6	0.9738	ALIGNED	12.1	12	12.26	27848568	-0.1	0.989	TRUE
sp|P02668|CASK_BOVIN	IPIQYVL	845.5131+	1	845.513	IPIQYVL																																				17.52	17.41	17.66	91509232	0.5	0.9935	TRUE
sp|P02668|CASK_BOVIN	IPIQYVL	423.2602++	2	423.26	IPIQYVL																						17.58	17.29	17.71	319931	-1.1	0.9583	ALIGNED	17.56	17.48	17.66	382255	3.4	0.9657	ALIGNED	17.5	17.41	17.66	96643856	0.2	0.9957	TRUE
sp|P02668|CASK_BOVIN	YVL	394.2336+	1	394.234	YVL	10.84	10.76	11	88119296	-0.3	0.9818	ALIGNED	10.82	10.74	10.98	83568856	-0.5	0.9797	ALIGNED	10.86	10.8	10.96	2885618	1.3	0.89	ALIGNED	10.93	10.84	11.04	139910	-0.1	0.8941	ALIGNED	10.94	10.85	11.03	218013	0.2	0.9614	ALIGNED	10.95	10.85	11.06	2394912	-1.6	0.9596	TRUE
sp|P02668|CASK_BOVIN	VLSRYPSYGLN	634.8353++	2	634.835	VLSRYPSYGLN																						11.5	11.47	11.52	26855	1.3	0.8965	ALIGNED								11.45	11.37	11.61	33101432	-1.1	0.9913	TRUE
sp|P02668|CASK_BOVIN	VLSRYPSY	492.7611++	2	492.761	VLSRYPSY																																				9.78	9.67	9.93	5847127	-0.7	0.9785	TRUE
sp|P02668|CASK_BOVIN	SRYPSYGLN	528.7591++	2	528.759	SRYPSYGLN																						9.75	9.56	9.85	608567	-0.8	0.9684	ALIGNED	9.75	9.63	9.83	427764	0.2	0.9471	ALIGNED
sp|P02668|CASK_BOVIN	SRYPSYG	829.3839+	1	829.384	SRYPSYG	6.88	6.66	7	51796056	-0.5	0.9983	TRUE	6.86	6.66	7.03	44274604	-0.7	0.9826	TRUE	6.85	6.68	7.04	55174360	-0.5	0.9974	TRUE															6.96	6.74	7.15	424909	0.4	0.9007	ALIGNED
sp|P02668|CASK_BOVIN	SRYPSYG	415.1956++	2	415.196	SRYPSYG	6.85	6.66	7	118600696	-0.6	0.9874	TRUE	6.84	6.66	7.03	93741112	-0.9	0.9925	TRUE	6.85	6.68	7.04	150324080	-0.8	0.9906	TRUE								6.94	6.8	7.03	183039	-2.1	0.8322	ALIGNED	6.95	6.74	7.15	2767461	-0.6	0.902	ALIGNED
sp|P02668|CASK_BOVIN	SRYPS	609.2991+	1	609.299	SRYPS	3.61	3.36	3.77	1101183360	-0.2	0.9904	TRUE	3.6	3.34	3.75	1154652544	-0.7	0.9898	TRUE	3.61	3.33	3.78	1278222208	-0.4	0.9906	TRUE															3.81	3.56	3.9	346034	3.5	0.8149	ALIGNED
sp|P02668|CASK_BOVIN	SRYPS	305.1532++	2	305.153	SRYPS	3.6	3.36	3.77	1413344128	-0.4	0.982	TRUE	3.58	3.34	3.75	1399367040	-0.9	0.9813	TRUE	3.58	3.33	3.78	1588521088	-0.5	0.9857	TRUE								3.52	3.34	3.61	657015	2.3	0.917	ALIGNED	3.81	3.56	3.9	829793	2.3	0.8132	ALIGNED
sp|P02668|CASK_BOVIN	RYPS	522.2671+	1	522.267	RYPS	2.82	2.62	3.05	162139664	0.1	0.9817	TRUE	2.78	2.64	3.05	151245168	-0.7	0.9813	TRUE	2.78	2.63	3.05	128918696	-0.6	0.9736	TRUE															3.06	2.97	3.08	36596	3.9	0.8464	ALIGNED
sp|P02668|CASK_BOVIN	YPSYG	586.2508+	1	586.251	YPSYG	7.62	7.2	7.78	160758160	-0.1	0.9879	TRUE	7.61	7.22	7.75	145204576	-0.2	0.9912	TRUE	7.62	7.31	7.76	158247360	-0.2	0.9887	TRUE	7.65	7.4	7.75	259889	0.9	0.9373	ALIGNED	7.66	7.39	7.77	543099	-0.1	0.909	ALIGNED	7.64	7.41	7.76	1413074	-1.1	0.938	ALIGNED
sp|P02668|CASK_BOVIN	YGL	352.1867+	1	352.187	YGL	8.91	8.79	9.05	529026048	-0.5	0.9893	ALIGNED								8.93	8.83	9.07	209682368	-0.6	0.9814	ALIGNED	8.96	8.87	9.09	33829128	0.4	0.9848	TRUE	9	8.91	9.15	119337904	-0.1	0.9878	ALIGNED	9.33	9.12	9.5	2999193	-0.3	0.8313	TRUE
sp|P02668|CASK_BOVIN	YYQ	473.2031+	1	473.203	YYQ	4.03	3.95	4.15	28973502	0.4	0.9798	TRUE	4.01	3.94	4.11	31029370	0.2	0.9733	TRUE	4.03	3.96	4.1	6217666	0.6	0.9507	ALIGNED
sp|P02668|CASK_BOVIN	YYQQKPVAL	555.3031++	2	555.303	YYQQKPVAL																																				10.54	10.46	10.72	86507712	1	0.9964	TRUE
sp|P02668|CASK_BOVIN	YYQQKPVAL	555.7951++	2	555.795	YYQQ[+1]KPVAL																																				11.07	10.99	11.24	8704296	-2	0.989	TRUE
sp|P02668|CASK_BOVIN	YQQKPVA	833.4516+	1	833.452	YQQKPVA	4.56	4.49	4.66	611578304	-1.1	0.9894	TRUE	4.56	4.47	4.64	567088640	-1.4	0.9906	TRUE	4.59	4.52	4.73	434553728	-0.9	0.9902	TRUE															4.69	4.56	4.84	393926	-2.4	0.8162	ALIGNED
sp|P02668|CASK_BOVIN	YQQKPVA	417.2294++	2	417.229	YQQKPVA	4.56	4.49	4.66	2254384384	-1.8	0.9936	TRUE	4.56	4.47	4.64	2071452672	-2.2	0.9949	TRUE	4.59	4.52	4.73	1741332352	-0.9	0.9929	TRUE															4.69	4.56	4.84	1423024	-1.4	0.9643	ALIGNED
sp|P02668|CASK_BOVIN	YQQKPV	762.4145+	1	762.414	YQQKPV	4.33	4.22	4.47	436719456	-0.7	0.9925	TRUE	4.31	4.22	4.46	477316384	-1.2	0.992	TRUE	4.36	4.25	4.49	448587264	-0.8	0.9899	TRUE															4.49	4.39	4.67	27009	-0.4	0.8135	ALIGNED
sp|P02668|CASK_BOVIN	YQQKPV	381.7109++	2	381.711	YQQKPV	4.33	4.22	4.47	1668930688	-0.8	0.9957	TRUE	4.31	4.22	4.46	1864579840	-1.2	0.9947	TRUE	4.35	4.25	4.49	1846960256	-1	0.9968	TRUE															4.49	4.39	4.67	687090	2.4	0.9217	ALIGNED
sp|P02668|CASK_BOVIN	YQQKPVAL	473.7715++	2	473.771	YQQKPVAL	9.31	9.24	9.47	2263321	1.4	0.8499	ALIGNED																						9.36	9.27	9.45	37655	0.5	0.9899	ALIGNED	9.36	9.26	9.53	20501886	-0.1	0.9887	TRUE
sp|P02668|CASK_BOVIN	QQKPV	599.3511+	1	599.351	QQKPV	2.22	2.11	2.35	336759072	-0.2	0.9903	TRUE	2.21	2.09	2.33	399344768	-0.5	0.9904	TRUE	2.22	2.11	2.35	370689216	-0.5	0.9893	TRUE
sp|P02668|CASK_BOVIN	QQKPVA	670.3883+	1	670.388	QQKPVA	2.46	2.39	2.53	474646656	-0.1	0.9881	TRUE	2.43	2.38	2.52	360454496	-0.8	0.9882	TRUE	2.46	2.39	2.53	294563680	-0.3	0.9884	TRUE
sp|P02668|CASK_BOVIN	LIN	359.2289+	1	359.229	LIN	5.25	5.17	5.34	14778364	-0.8	0.964	TRUE	5.24	5.16	5.34	18504288	-1.2	0.9651	ALIGNED	5.29	5.2	5.38	17733796	-0.7	0.9647	ALIGNED								5.36	5.31	5.43	38805	0.9	0.9019	ALIGNED
sp|P02668|CASK_BOVIN	LINNQ	601.3304+	1	601.33	LINNQ	4.38	4.31	4.49	118151584	-0.1	0.9848	ALIGNED	4.37	4.3	4.46	115737848	-0.7	0.9834	ALIGNED	4.4	4.33	4.48	117117616	-0.2	0.9834	TRUE
sp|P02668|CASK_BOVIN	LINNQFLPYP	609.8295++	2	609.83	LINNQFLPYP	17.7	17.53	17.88	104083064	2.3	0.9933	TRUE	17.68	17.51	17.87	103828448	2.2	0.9985	TRUE	17.61	17.45	17.77	66132448	4	0.9967	TRUE
sp|P02668|CASK_BOVIN	INN	360.1878+	1	360.188	INN	0.89	0.83	0.99	105837808	-1.8	0.9785	TRUE	0.88	0.82	0.96	102081704	-2.2	0.9792	TRUE	0.89	0.73	0.99	209646448	-1.9	0.98	TRUE
sp|P02668|CASK_BOVIN	INNQ	488.2463+	1	488.246	INNQ	0.93	0.89	1.01	866379392	-1.2	0.9878	ALIGNED	0.94	0.88	1.01	848289920	-1.5	0.9876	TRUE	0.93	0.89	1.01	985794112	-1.6	0.9857	TRUE
sp|P02668|CASK_BOVIN	INNQFLPY	1008.5149+	1	1008.51	INNQFLPY	15.57	15.47	15.73	64640504	0.5	0.9896	TRUE	15.56	15.43	15.72	65205404	-0.1	0.9918	TRUE	15.5	15.4	15.66	8506159	0.2	0.9819	ALIGNED
sp|P02668|CASK_BOVIN	INNQFLPY	504.7611++	2	504.761	INNQFLPY	15.58	15.47	15.73	141156464	0.1	0.9933	TRUE	15.56	15.43	15.72	145560336	-0.5	0.9953	TRUE	15.5	15.4	15.66	19919074	0.3	0.9795	ALIGNED
sp|P02668|CASK_BOVIN	INNQFLPYP	1105.5677+	1	1105.57	INNQFLPYP	16.39	16.24	16.59	1339453952	-1.6	0.9978	TRUE	16.34	16.23	16.59	1330678656	-1.6	0.9974	TRUE	16.31	16.15	16.52	1201878912	-0.9	0.996	TRUE
sp|P02668|CASK_BOVIN	INNQFLPYP	553.2875++	2	553.287	INNQFLPYP	16.37	16.24	16.59	3180837376	-2.2	0.9973	TRUE	16.34	16.23	16.59	3105765888	-2.3	0.9962	TRUE	16.3	16.15	16.52	3178162432	-1.4	0.9961	TRUE															16.18	16.04	16.35	538793	1.3	0.9304	ALIGNED
sp|P02668|CASK_BOVIN	INNQFLPYPY	1268.6310+	1	1268.63	INNQFLPYPY	17.34	17.21	17.5	765458432	-0.3	0.9938	TRUE	17.33	17.19	17.47	800279104	-0.5	0.9952	TRUE	17.25	17.1	17.4	15590620	0.8	0.9951	TRUE
sp|P02668|CASK_BOVIN	INNQFLPYPY	634.8191++	2	634.819	INNQFLPYPY	17.34	17.21	17.5	3076036608	-0.5	0.995	TRUE	17.33	17.19	17.47	3121421056	-0.7	0.9939	TRUE	17.25	17.1	17.4	109789080	0.1	0.9942	TRUE															17.12	16.99	17.27	153271	3.2	0.8074	ALIGNED
sp|P02668|CASK_BOVIN	INNQFLPYPY	635.3111++	2	635.311	IN[+1]NQFLPYPY	17.57	17.48	17.87	78590608	2.5	0.9982	TRUE	17.57	17.47	17.72	59531556	2.4	0.9744	TRUE
sp|P02668|CASK_BOVIN	INNQ	489.2304+	1	489.23	IN[+1]NQ	1.24	1.07	1.39	19078572	-2.3	0.9578	ALIGNED	1.24	1.06	1.4	25267558	-1.9	0.9557	ALIGNED	1.24	1.05	1.39	26561620	-1.3	0.9886	TRUE
sp|P02668|CASK_BOVIN	INNQFLPYP	553.7795++	2	553.779	IN[+1]NQFLPYP								16.52	16.52	16.94	69827144	0.6	0.9955	TRUE
sp|P02668|CASK_BOVIN	NNQFLPYPY	578.7691++	2	578.769	NN[+1]QFLPYPY	16.92	16.77	17.09	34957840	0.3	0.9795	ALIGNED	16.91	16.77	17.07	39091860	-0.3	0.9922	TRUE
sp|P02668|CASK_BOVIN	NNQFLPYP	992.4836+	1	992.484	NNQFLPYP	15.6	15.47	15.95	240997008	0.2	0.995	TRUE	15.57	15.46	15.87	227475504	0	0.9964	TRUE	15.52	15.39	15.8	276260544	0.8	0.9991	TRUE
sp|P02668|CASK_BOVIN	NNQFLPYP	496.7454++	2	496.745	NNQFLPYP	15.61	15.47	15.95	529242016	0.6	0.9966	TRUE	15.6	15.46	15.87	509748128	0.2	0.9947	TRUE	15.53	15.39	15.8	678381056	0.7	0.995	TRUE															15.44	15.34	15.59	93407	0.8	0.9269	ALIGNED
sp|P02668|CASK_BOVIN	NNQFLPYPY	1155.5469+	1	1155.55	NNQFLPYPY	16.62	16.49	16.77	175733760	-0.5	0.99	TRUE	16.59	16.48	16.77	185477616	-0.7	0.9908	TRUE	16.55	16.42	16.7	9701630	1	0.9682	TRUE
sp|P02668|CASK_BOVIN	NNQFLPYPY	578.2771++	2	578.277	NNQFLPYPY	16.62	16.49	16.77	538870592	-1	0.9908	TRUE	16.61	16.48	16.77	556852736	-1.3	0.9914	TRUE	16.54	16.42	16.7	37953864	-0.5	0.9729	TRUE
sp|P02668|CASK_BOVIN	NNQFLPYP	497.2374++	2	497.237	N[+1]NQFLPYP	15.91	15.76	16.27	28727384	0.6	0.9473	TRUE	15.86	15.78	16.27	30244284	-0.5	0.954	TRUE	15.81	15.71	16.1	33309450	-0.1	0.9939	TRUE
sp|P02668|CASK_BOVIN	NQFLPYPY	521.2556++	2	521.256	NQFLPYPY	16.83	16.72	16.97	33632780	1.5	0.9967	TRUE	16.81	16.67	16.94	38454600	1	0.9918	TRUE	16.77	16.61	16.84	1992965	1	0.9538	ALIGNED
sp|P02668|CASK_BOVIN	NQFLPYP	878.4407+	1	878.441	NQFLPYP
sp|P02668|CASK_BOVIN	NQFLPYP	439.7240++	2	439.724	NQFLPYP	15.82	15.75	16.31	20343266	0.9	0.9823	ALIGNED	15.81	15.46	16.06	24195948	0.5	0.9865	ALIGNED	15.7	15.4	15.71	8064151	1.7	0.9839	TRUE
sp|P02668|CASK_BOVIN	QFLPYPY	927.4611+	1	927.461	QFLPYPY	16.93	16.81	17.1	117572496	-0.1	0.9915	TRUE	16.93	16.8	17.08	142541616	-0.6	0.9943	TRUE	16.86	16.74	17.06	4613925	-0.2	0.9616	ALIGNED
sp|P02668|CASK_BOVIN	QFLPYPY	464.2342++	2	464.234	QFLPYPY	16.94	16.81	17.1	188045024	0.2	0.9936	TRUE	16.93	16.8	17.08	230109344	-0.2	0.9931	TRUE	16.84	16.74	17.06	9291774	-0.2	0.9778	ALIGNED															16.73	16.67	16.78	66158	0.5	0.9355	ALIGNED
sp|P02668|CASK_BOVIN	QFLPYP	764.3978+	1	764.398	QFLPYP	15.98	15.83	16.22	254990608	0.2	0.9901	TRUE	15.94	15.68	16.15	290377664	0.4	0.9852	TRUE	15.88	15.6	16.14	561755648	0.5	0.9883	TRUE
sp|P02668|CASK_BOVIN	QFLPYP	382.7025++	2	382.703	QFLPYP	15.96	15.83	16.22	163769968	0.4	0.9583	TRUE	15.94	15.68	16.15	182762976	-0.1	0.9589	TRUE	15.85	15.6	16.14	374636544	0.3	0.9662	TRUE
sp|P02668|CASK_BOVIN	FLPYPY	799.4025+	1	799.403	FLPYPY	15.78	15.65	16.02	932010624	0.3	0.9949	TRUE	15.78	15.64	16.02	1003356992	-0.3	0.9948	TRUE	15.74	15.54	15.93	29303192	1.2	0.9915	TRUE															15.61	15.49	15.74	346334	2.5	0.9088	ALIGNED
sp|P02668|CASK_BOVIN	FLPYPY	400.2049++	2	400.205	FLPYPY	15.8	15.65	16.02	620093760	0.3	0.9931	TRUE	15.79	15.64	16.02	657486336	-0.2	0.9954	TRUE	15.73	15.54	15.93	21842426	1	0.9769	TRUE															15.6	15.49	15.74	411715	1.5	0.9363	ALIGNED
sp|P02668|CASK_BOVIN	FLPY	539.2864+	1	539.286	FLPY	13.28	13.17	13.44	59353000	0.3	0.9836	TRUE	13.27	13.14	13.43	65229908	0.2	0.9898	TRUE	13.25	13.14	13.42	34316404	0.7	0.9787	ALIGNED															13.13	13	13.3	559865	-1.1	0.8423	ALIGNED
sp|P02668|CASK_BOVIN	FLPYP	636.3392+	1	636.339	FLPYP	14.62	14.43	14.79	3419078912	-0.5	0.9935	TRUE	14.62	14.41	14.76	3378385664	-0.9	0.9935	TRUE	14.56	14.37	14.74	6989454848	-0.8	0.9939	TRUE
sp|P02668|CASK_BOVIN	FLPYP	318.6732++	2	318.673	FLPYP	14.62	14.43	14.79	397487552	-0.5	0.9898	TRUE	14.59	14.41	14.76	375678016	-1	0.9918	TRUE	14.56	14.37	14.74	726896960	-0.8	0.9886	TRUE															14.52	14.32	14.61	50192	-0.3	0.8401	ALIGNED
sp|P02668|CASK_BOVIN	LPY	392.2180+	1	392.218	LPY	8.3	8.22	8.41	400088800	-0.9	0.9776	TRUE	8.29	8.22	8.42	466722592	-1.2	0.977	TRUE	8.31	8.23	8.42	226229728	-0.6	0.9698	TRUE	8.34	8.23	8.48	3268227	-0.1	0.9713	ALIGNED	8.38	8.28	8.5	17166106	-0.6	0.9698	ALIGNED	8.38	8.25	8.55	2083263	-1	0.957	ALIGNED
sp|P02668|CASK_BOVIN	LPYP	489.2708+	1	489.271	LPYP	10.88	10.58	11.05	2540055552	-0.1	0.9836	TRUE	10.91	10.57	11.02	2691191040	-0.4	0.9866	TRUE	10.87	10.57	11.02	5865523712	0.1	0.9882	TRUE															10.92	10.67	10.99	1016474	0.1	0.909	ALIGNED
sp|P02668|CASK_BOVIN	LPYPY	652.3341+	1	652.334	LPYPY	12.47	12.34	12.68	1422815104	-1.4	0.9911	TRUE	12.43	12.34	12.65	1581563008	-1.9	0.9916	TRUE	12.41	12.25	12.64	189571840	-1.1	0.9816	TRUE	12.46	12.35	12.62	668613	3.9	0.9362	ALIGNED
[truncated: 108 more rows]
