# Supplementary material for: Effect of Ripening and In Vitro Digestion on Bioactive Peptides Profile in Ras Cheese and Their Biological Activities
Source: Biology (Basel). 2023 Jul 2;12(7):948. doi: 10.3390/biology12070948 (PMC10376354; doi:10.3390/biology12070948)
Supplement: Supplementary file 1 [file biology-12-00948-s001.zip › Table_S4.xlsx]

## Sheet: ACE_inhibitory_evolution 
ACE-inhibitory peptide abundance expresses as AUP/g of cheese. Empty cells indicated that the peptide was not found in that specific sample. DR means digested Ras cheese whereas R means un-digested Ras cheese. The number indicates the days of ripening.
Peptide	DR180 Total Area	DR90 Total Area	DR30 Total Area	R180 Total Area	R90 Total Area	R30 Total Area
RPK	385672192000	568203648000	652693952000
RPKHPI		6666088000	7418120000	498098680000	85372644000	16973273000
ENLLRF	5489104000	10303592000		405137100000	383704818000	2704703616000
LRFF	983472000					331715360000
FVAPFPEVFG	1515345344000	4136294784000	3220217088000	414774440000	62972983000	45386430000
PFPEVFGK				3888290000	2560592000	834720000
FPEVFGK				184385860000	138950185000	7630605000
VPSERYL				219518540000	11211020000	45871636000
VPSERY				192869400000	25090246000	10619365000
RYLGY			37414832000			5077722000
YLGY	152156288000		36556712000	87141580000	20956146000	42027524000
YLGYLE	4270432000	8244544000		1425170310000	140346629000	37057902000
LGY	2271036672000	3048551936000	45276960000	21373400000	6354179000	4600298000
YKVPQL	4054699264000	6303626752000		167497380000	17153316000	58916460000
AYFYPE	1251700928000	878024896000	438695440000	17832360000	5405043000	15111835000
AYFYPEL	2898443392000	2839326976000	150263216000	1264760000		543511000
YFYPEL	21230891008000	24066013184000	2213036032000
DAYPSGAW	1442024960000	1224294144000	71181584000	13252590000	473296000
GAW	20038645760000	22562172928000	12442897408000
NMAINPSK	2890464000000	1701426832000	298415800000
YQKFPQY				23754410000	5673362000	68301952000
FALPQY				510950000	237528000	8035179000
AMKPW	2504746496000	2034711680000	2091127040000	2017550000	535082000
WIQP	38355976000	6331816000		155109100000	18281168000	5652238000
TKVIP	203041792000	150138512000	224822912000	12596860000	4406209000	3360799000
LNVPGEIVE	5386762240000	5401935104000	4384954368000	407576480000	87499780000	19508901000
DKIHP	969503104000	641370176000	1347388800000	446839520000	111021456000	21105430000
DKIHPF	5501756416000	6037448192000	93007120000	1391652480000	978636000	458652096000
LVYPFPGPI	29745649664000	33362513920000	15084785664000		99459000	193293000
LVYPFPGPIP	12915880000	20879880000	184960336000	1592280000	7618680000	77435250000
VYPFPGPIPN	190848188416000	186032349184000	86745456640000	77241580000	20200033000	55223622000
YPFPGPI	9727679616000	8691257728000	3677539968000	15956210000		1215952000
YPFPGPIPN	8187744000000	7317966592000	2699108608000	1250806420000	191592080000	72882196000
YPFPGPIP	860588864000	1837195136000	1310813184000	30589310000	4599930000	5240939000
PFP	266086608000			46120900000	7909449000	12148522000
PFPGPIPN	5088237312000	5543958528000	3958502272000	5220800000	1158319000	892595000
PGPIPN	1850209280000	1796797568000	882532864000	35203440000	10241716000
SLPQ	30091335680000	31701766144000	30603694080000	54640510000	58694880000	24860352000
NIPPLTQTPVVVPPFLQ	152996320000	142019200000	15927424000
NIPPLTQTPV	3958024704000	4103638528000	3775293184000		917633000	3560582000
IPP	323112512000	989066688000	14241640000	925786800000	302489824000	78543544000
TPVVVPPFLQP	179102720000	78089136000	37485632000	22305060000	4075806000	1905645000
VVPP	172897024000	127793720000	267425856000	59275040000	26517644000	5429804000
VPP	500329792000	600302592000		511761680000	369549504000	25242130000
EMPFPK	212207571968000	223660609024000	186477953792000	4904180000	3314911000	7393331000
KYP				2300640000	2122488000	1493471000
NLHLPLP	325728544000	344739872000	1202680576000		321771000	16003959000
NLHLPLPLL	94392680000	81586768000			101911000	18914836000
LHLPLP	6848413696000	504532942848000				2916597000
LHLPLPL	1486209536000	1632462848000	860402816000			151843000
HLPLP	12397948928000	12415017472000	23922329600000		1051824000	68944114000
LPLP	1545652864000	1071124928000	4227244032000	3850646400000	394375488000	53910544000
LPLPLL	84164200000	104747672000	13242240000	4391760000	2026932000	97119522000
LQSW	5041268224000	5320069120000	175645936000	3193830000	460426000	1236788000
WMHQPHQPLPPT	1383464960000	956095872000	400299320000
HQPHQPLPPT	7773891328000	8231423104000	14237778624000		97314000	3662999000
SKVLPVPQ	279589184000	163688400000	78851872000		684171000
KVLPVPQ	3719654912000	3173354752000	2842233600000	11862040000	3495340000	38217678000
VLPVPQK	41252767232000	7092915712000	513913816000		23496000	12521990000
RDMPIQAF					51760000	11684256000
LYQEPVLGPVR	162947632000	177332656000	98473792000
YQEP				1233900000	749585000	2643208000
YQEPVLGPVR	3816031744000	3321440096000	2434236176000	2212530000	422290000	1864655000
YQEPVLGPVRGPFPIIV	197078864000	229544608000	147892320000	3442200000	222948000	489403000
QEPVLGPVRGPFPIIV	70285256000	96256848000	61340024000		40083000	447361000
EPVLGPVRGPFP	4121576000	16150552000	28197512000	70618890000	5703305000	8934001000
VLGPVRGPFP				37826190000	3647890000	15688904000
VRGPFPIIV	9779576000	12091744000		12683510000	4279949000	7984731000
VRGPFP				26091530000	12966715000	25666316000
EKDERF				58979670000	4073842000	266127000
DERF	102226984000	113832424000	1174984000	227313840000	20128138000	1539473000
IAK	4361213440000	3436254976000	783895936000
YGL	4232208384000		1677458944000	338291280000	119337904000	2999193000
LPYPY	12621282688000	13906053632000	1676283536000	7974560000	94956000	358533000
IIAEK	1644392544000	1192155488000	456766320000
IAEK	397151328000	293740384000	111401464000
VLDTDYK	342608256000	226730976000
YLL	416430208000	502706368000	38349240000	3731220000	376786000	1157131000
ALPM	98560816000	87827664000	4798792736000
ALPMH	285955376000	862478080000	1445246080000

## Sheet: Antioxidant_evolution
Antioxidant peptide abundance expresses as AUP/g of cheese. Empty cells indicated that the peptide was not found in that specific sample. DR means digested Ras cheese whereas R means un-digested Ras cheese. The number indicates the days of ripening.
Peptide	DR180 Total Area	DR90 Total Area	DR30 Total Area	R180 Total Area	R90 Total Area	R30 Total Area
RYLGY			37414832000			5077722000
YLG	15206770688000	21003589632000	20974254080000	435325400000	115990656000	7799691000
YLGY	152156288000		36556712000	87141580000	20956146000	42027524000
YLGYLE	4270432000	8244544000		1425170310000	140346629000	37057902000
LGY	2271036672000	3048551936000	45276960000	21373400000	6354179000	4600298000
LHSMK	131773000000	19068208000	13083336000
AYFYPE	1251700928000	878024896000	438695440000	17832360000	5405043000	15111835000
AYFYPEL	2898443392000	2839326976000	150263216000	1264760000		543511000
YFYPEL	21230891008000	24066013184000	2213036032000
PEL	8646327296000	9697793024000	3585723136000	16867940000	3888333000	631697000
KALNEINQF	11627552000	4065368000			1376194000	11379786000
YQKFPQY				23754410000	5673362000	68301952000
RELEEL	12507421696000	18050514944000	12182311936000	15177480000	869727000	237702976000
NVPGEIVESL	1421007232000	1852869120000	1845608064000	14006550000	7132039000	10674065000
VYPFPGPIPN	190848188416000	186032349184000	86745456640000	77241580000	20200033000	55223622000
YPFPGPI	9727679616000	8691257728000	3677539968000	15956210000		1215952000
YPFPGPIPN	8187744000000	7317966592000	2699108608000	1250806420000	191592080000	72882196000
YPFPGPIP	860588864000	1837195136000	1310813184000	30589310000	4599930000	5240939000
IPP	323112512000	989066688000	14241640000	925786800000	302489824000	78543544000
TQTPVVVPPFLQPE	488403792000	569213040000	1111843488000	6271220000	4526467000	10142786000
VPP	500329792000	600302592000		511761680000	369549504000	25242130000
FPKYPVEPF		11586344000		105693730000	18568696000	9690038000
YPVEPF	278135476224000	303360188416000	210229393408000	296957280000	107620230000	26798100000
VLPVPQK	41252767232000	7092915712000	513913816000		23496000	12521990000
VPYPQR				4373870000	555008000	1981584000
VPYPQ	2371803840000	2802955744000	3041464256000	88042240000	14411111000	48551084000
PYPQ	34265271616000	35385096512000	32921591936000	5266770000	2344682000	23058062000
LLY	456883456000	531197344000	182317264000		1179397000	9174862000
YQEP				1233900000	749585000	2643208000
YQEPVLGPVR	3816031744000	3321440096000	2434236176000	2212530000	422290000	1864655000
YVL	704954368000	668550848000	23084944000	1399100000	218013000	2394912000
YLL	416430208000	502706368000	38349240000	3731220000	376786000	1157131000

## Sheet: DPPIV_inhibitory_evolution
DPP-IV-inhibitory peptide abundance expresses as AUP/g of cheese. Empty cells indicated that the peptide was not found in that specific sample. DR means digested Ras cheese whereas R means un-digested Ras cheese. The number indicates the days of ripening.
Peptide	DR180 Total Area	DR90 Total Area	DR30 Total Area	R180 Total Area	R90 Total Area	R30 Total Area
APFPE	779326592000	227203488000	63436160000	8602148080000	983993008000	317770436000
VPITPT	1319798656000	1105205504000	784124480000	382351920000	106813432000	55315580000
WIQP	38355976000	6331816000		155109100000	18281168000	5652238000
VPGEIVE	1245959032000	1725770720000	394207744000	1113440060000	503731312000	90389285000
YPFPGPIPN	8187744000000	7317966592000	2699108608000	1250806420000	191592080000	72882196000
FPGPIPN	753807320000	627238400000	243347600000	266243350000	78880680000	30941104000
SLPQNIPPL	3475843456000	3365527296000	5598516480000	4799300000	6229425000	27189444000
IPP	323112512000	989066688000	14241640000	925786800000	302489824000	78543544000
IPPLTQT		70958240000			99699000
YPVEPF	278135476224000	303360188416000	210229393408000	296957280000	107620230000	26798100000
LPLPL	30218842240000	34115748736000	24382477440000	25144030000	4367186000	57957714000
LPLPLL	84164200000	104747672000	13242240000	4391760000	2026932000	97119522000
LPVPQ	15433983744000	18974110720000	16245063168000	54281220000	8448164000	42280130000
VPYPQ	2371803840000	2802955744000	3041464256000	88042240000	14411111000	48551084000
IPIQY	656234328000	582885336000	66214824000	20008580000	4138939000	254473592000
INNQFLPYPY	31360685184000	31849853728000	1003037600000			153271000
LPYPY	12621282688000	13906053632000	1676283536000	7974560000	94956000	358533000
TPEVDDEALEK	471561728000	369945984000	298750912000

## Sheet: Antimicrobial_evolution
Anti-microbial peptide abundance expresses as AUP/g of cheese. Empty cells indicated that the peptide was not found in that specific sample. DR means digested Ras cheese whereas R means un-digested Ras cheese. The number indicates the days of ripening.
Peptide	DR180 Total Area	DR90 Total Area	DR30 Total Area	R180 Total Area	R90 Total Area	R30 Total Area
RPKHPIK				88813850000		1099040000
VLNENLLR				43986990000	16881928000	252576048000
YLEQLLR		9065016000	5034016000	290156080000	33986840000	4706069000
SDIPNPIGSENSEK	10501508864000	8810559616000	1582828800000	1669990000	1233022000	153869000
LKKISQ						1866728000
TKVIPYVRYL				21122400000	1646668000	6027976000
SSSEESITRIN						1811374000
EAMAPK	54118488576000	50030668288000	41255877376000	1717990000	669231000	4902986000
HKEMPFPK	68434515328000	61468051456000	47916837696000	2083760000	770838000
EMPFPK	212207571968000	223660609024000	186477953792000	4904180000	3314911000	7393331000
YPVEPF	278135476224000	303360188416000	210229393408000	296957280000	107620230000	26798100000
DVENLHLPLPL	12191504416000	11770171040000	2452374672000			1061997000
VLPVPQK	41252767232000	7092915712000	513913816000		23496000	12521990000
YQEPVLGPVRGPFPI	1432711264000	1343078848000	667458080000	1583350000	208878000	1322446000
YQEPVLGPVRGPFPIIV	197078864000	229544608000	147892320000	3442200000	222948000	489403000
FFSDK	1725897280000	1823461984000	154923384000		103936000	404682000
IAK	4361213440000	3436254976000	783895936000
YVL	704954368000	668550848000	23084944000	1399100000	218013000	2394912000
TPEVDDEALEK	471561728000	369945984000	298750912000

## Sheet: Opioid_evolution
Opioid peptide abundance expresses as AUP/g of cheese. Empty cells indicated that the peptide was not found in that specific sample. DR means digested Ras cheese whereas R means un-digested Ras cheese. The number indicates the days of ripening.
Peptide	DR180 Total Area	DR90 Total Area	DR30 Total Area	R180 Total Area	R90 Total Area	R30 Total Area
YLGYLE	4270432000	8244544000		1425170310000	140346629000	37057902000
AYFYPEL	2898443392000	2839326976000	150263216000	1264760000		543511000
YFYPEL	21230891008000	24066013184000	2213036032000
YFYPE	11237409280000	8808509568000	10039087104000	19272250000	6474232000	13862287000
YPFPGPI	9727679616000	8691257728000	3677539968000	15956210000		1215952000
YPFP	908712640000	863828992000	516696640000	194900320000	34611448000	9777525000
YPVEPF	278135476224000	303360188416000	210229393408000	296957280000	107620230000	26798100000
